# Supplementary material for: ESCO1 and CTCF enable formation of long chromatin loops by protecting cohesinSTAG1 from WAPL
Source: eLife. 2020 Feb 17;9:e52091. doi: 10.7554/eLife.52091 (PMC7054000; doi:10.7554/eLife.52091)
Supplement: Figure 2—figure supplement 2—source data 1. [file elife-52091-fig2-figsupp2-data1.xlsx]

## Sheet: G1
time (s)	STAG1-EGFP H8 G1						STAG2-EGFP F2 G1						EGFP-STAG1 H4 G1						STAG1-EGFP H8 G2							STAG2-EGFP F2 G2							EGFP-STAG1 H4 G2
-18.9669	0.971136	1.00145	1.01761	1.03688	1.01293	1.02831	0.968334	0.982092	0.990779	1.01145	0.969462	0.984636	0.922619	1.01476	0.987414	1.07454	0.948544		0.988353	0.972654	1.00843	1.05802	0.974344	0.997292		0.986926	0.966693	1.00509	1.01037	1.00504	0.975281	0.986224	1.07672	1.02745	0.988506	1.01345	1.02837
-16.9854	1.01721	1.02817	1.05704	0.913823	1.07673	1.00232	0.971348	1.00716	0.996988	0.9422	0.997018	1.0433	0.990996	1.02481	1.01911	0.95347	1.00617		1.04784	1.04321	0.982192	0.998565	1.01767	0.975519		1.00584	1.01903	1.00534	1.01402	0.987043	0.984134	1.00962	1.00254	1.02399	1.02115	0.987494	0.956017
-14.9942	1.04551	0.974434	0.964072	1.01783	1.04571	1.02247	0.97914	1.0096	0.994036	1.04422	0.97832	0.981124	1.0161	0.978063	0.985583	0.989222	1.05401		0.960578	0.964821	1.02183	0.94481	1.01854	0.949972		1.02055	1.00115	1.01902	1.00615	0.966563	0.999305	1.04437	0.923609	0.986297	0.967019	0.994968	0.947737
-12.9909	0.947473	1.0283	0.941289	0.979838	0.990228	0.99582	0.999797	1.01408	1.03819	0.9897	0.999312	0.973469	1.02663	0.912425	1.05414	0.945465	0.935808		1.03918	1.00365	1.0121	0.979217	1.01246	1.11312		0.992025	1.00233	1.00107	1.00285	0.962266	1.00029	1.00298	0.994619	1.02052	0.992117	1.01116	1.06093
-10.9876	0.992801	1.08193	1.01002	1.03709	0.914835	1.04177	1.03682	1.04552	1.00727	0.976173	1.00095	0.995348	1.06384	0.985177	1.00519	0.926388	1.02098		0.997637	0.908511	0.977448	1.07376	1.09292	1.03207		1.02759	1.00337	0.997514	0.995087	0.97137	1.01056	0.992163	0.940442	1.03096	0.976839	0.994173	0.956565
-8.98425	1.00841	1.01061	1.00154	1.00073	0.961389	1.00685	1.04588	0.993669	1.00413	1.02208	0.989097	0.985943	0.988301	0.993549	0.962247	1.00478	1.00595		0.933065	1.02092	1.01305	1.03412	0.953236	0.982644		0.979421	0.994758	0.972848	0.953106	1.01885	0.992366	0.969408	0.975389	1.01019	1.01425	0.992289	1.02129
-6.98095	0.983415	0.96687	1.01066	1.04813	0.947064	0.957157	0.961597	1.00954	0.989451	1.01223	1.01329	1.00754	0.979146	1.0335	0.997	1.04321	0.96844		0.965786	1.02435	0.994041	0.960633	0.935897	0.955313		0.998572	1.00984	1.01457	1.00088	1.03608	0.993474	1.00737	1.02361	1.0161	0.986656	0.910812	1.02424
-4.98973	0.987729	0.904475	1.03113	0.950835	1.01175	0.941651	1.00054	0.973546	0.974113	0.976824	1.01427	1.0259	1.04118	1.0347	1.00111	1.00307	1.02461		1.00673	1.04004	0.983765	1.01068	0.989414	1.05209		0.975388	0.991819	0.985357	1.00663	1.04005	0.993877	0.963587	1.08725	0.944444	1.02674	0.948384	0.944273
-2.98642	1.00375	0.981048	0.959644	1.00382	1.03759	1.00091	1.00545	0.972945	0.995578	1.03108	1.00949	0.986893	0.970328	1.01744	0.989976	1.03232	0.953535		1.03176	1.02419	0.971854	0.917988	1.014	0.958231		0.992062	0.996695	1.00316	0.999967	1.03393	1.04015	0.998274	0.95352	0.959327	1.02469	1.05686	1.05485
-0.983115	1.04256	1.02272	1.007	1.01101	1.00177	1.00275	1.0311	0.991852	1.00947	0.994048	1.02879	1.01584	1.00085	1.00558	0.99822	1.02753	1.08195		1.02907	0.99765	1.0353	1.0222	0.991525	0.983747		1.02164	1.01432	0.996019	1.01094	0.978798	1.01057	1.026	1.02231	0.980727	1.00202	1.09041	1.00574
0	0	0	0	0	0	0	0	0	0	0	0	0	0	0	0	0	0		0	0	0	0	0	0		0	0	0	0	0	0	0	0	0	0	0	0
1.01829	0.0148529	0.15864	0.0523623	0.0864433	0.0985499	0.0538039	0.170888	0.195727	0.134803	0.182017	0.188957	0.191481	0.0922325	0.0438096	0.154774	0.036694	0.144776		0.0626247	0.0748707	0.0834446	0.108161	0.0568587	0.0506131		0.0676102	0.0913377	0.0789746	0.0959656	0.157294	0.141303	0.122289	0.129577	0.0770204	0.0371422	0.10494	0.101675
3.0216	0.174573	0.109381	0.130569	0.0879264	0.211334	0.047427	0.341445	0.305272	0.196086	0.366273	0.297349	0.308261	0.185292	0.145302	0.281719	0.114676	0.250347		0.0500173	0.0839835	0.121964	0.104197	0.0894715	0.0755344		0.152176	0.129706	0.152831	0.141919	0.248994	0.200127	0.194936	0.199661	0.135678	0.131162	0.177228	0.0518481
5.01282	0.152384	0.139744	0.130093	0.120133	0.167471	0.127998	0.371987	0.390328	0.22888	0.351077	0.355488	0.374377	0.178509	0.195117	0.276556	0.193034	0.234916		0.0819726	0.140704	0.152341	0.138178	0.0435825	0.021073		0.178223	0.163776	0.192685	0.177653	0.290984	0.226912	0.215329	0.119605	0.0963333	0.0915752	0.197012	0.137322
7.01612	0.0941066	0.17063	0.167519	0.243923	0.196821	0.164077	0.371752	0.410303	0.293462	0.438594	0.418916	0.399935	0.214062	0.185192	0.26944	0.119756	0.148119		0.134452	0.132738	0.120112	0.104173	0.0406106	0.156146		0.211863	0.165585	0.225047	0.222068	0.299981	0.250743	0.2388	0.180966	0.0838546	0.174158	0.136163	0.245033
9.01887	0.0856531	0.215296	0.184061	0.187651	0.225038	0.0937394	0.412293	0.473297	0.315347	0.479197	0.405834	0.414346	0.222191	0.182876	0.299013	0.145948	0.184619		0.0502962	0.12094	0.143182	0.157017	0.167527	0.0945384		0.215968	0.192685	0.238093	0.220829	0.335923	0.257489	0.251706	0.215496	0.0807542	0.150802	0.153588	0.177667
11.0222	0.185936	0.184906	0.209337	0.210651	0.180653	0.125541	0.437254	0.474071	0.309349	0.549777	0.459695	0.427859	0.227683	0.214012	0.319187	0.157947	0.261742		0.0490578	0.17517	0.142041	0.178584	0.140567	0.105705		0.239101	0.227473	0.261728	0.229988	0.329278	0.267049	0.297308	0.257893	0.129614	0.147971	0.195216	0.146323
13.0267	0.203514	0.257259	0.223829	0.219516	0.223551	0.162508	0.439448	0.465396	0.320147	0.529741	0.47778	0.477376	0.22072	0.236246	0.285536	0.245739	0.284863		0.0728646	0.0875183	0.162407	0.154265	0.0975533	0.0827036		0.27252	0.239448	0.260001	0.254006	0.343204	0.284044	0.292778	0.237748	0.0972371	0.148415	0.207892	0.134431
15.03	0.167808	0.225312	0.216114	0.20364	0.214612	0.157185	0.452007	0.530335	0.339555	0.537742	0.50829	0.475212	0.215251	0.220379	0.275986	0.106204	0.246993		0.0817399	0.0620577	0.149312	0.0876187	0.107806	0.0424071		0.275071	0.229528	0.267233	0.239848	0.364584	0.316378	0.333045	0.172776	0.138169	0.184163	0.156863	0.154025
17.0212	0.198115	0.225095	0.224386	0.192198	0.266342	0.171	0.497258	0.527319	0.341198	0.52898	0.488746	0.47967	0.297834	0.240548	0.353818	0.17719	0.240953		0.10632	0.192376	0.16389	0.157588	0.16276	0.0981573		0.263018	0.251389	0.264423	0.254023	0.357315	0.327539	0.293555	0.230109	0.182681	0.201198	0.260036	0.246831
19.0245	0.20299	0.264664	0.277003	0.123368	0.19735	0.191177	0.531873	0.566969	0.351585	0.538616	0.529984	0.484063	0.293834	0.255045	0.315971	0.218246	0.290409		0.149677	0.168494	0.223603	0.178096	0.026616	0.125875		0.274194	0.271185	0.28936	0.282796	0.379751	0.348537	0.292654	0.139137	0.210169	0.151636	0.274054	0.202622
21.0278	0.245153	0.226021	0.218955	0.252634	0.173	0.137492	0.493068	0.547502	0.367857	0.557136	0.491856	0.506501	0.244617	0.209856	0.318104	0.211407	0.217882		0.110803	0.210878	0.206686	0.143992	0.081279	0.185193		0.264919	0.291757	0.294555	0.290777	0.389981	0.362405	0.319185	0.163684	0.180678	0.171127	0.191785	0.243033
23.0311	0.212481	0.233724	0.273902	0.2324	0.26343	0.247542	0.525818	0.591063	0.383508	0.571028	0.539713	0.546871	0.258615	0.239102	0.342694	0.175069	0.314692		0.128823	0.212575	0.17423	0.142195	0.133775	0.115533		0.299885	0.272145	0.307656	0.249924	0.397877	0.372837	0.337351	0.176235	0.181445	0.201645	0.189465	0.160617
25.0344	0.216325	0.282444	0.279752	0.219384	0.223279	0.197359	0.559513	0.575505	0.373457	0.583747	0.566462	0.539945	0.294923	0.229547	0.390798	0.196838	0.319163		0.135599	0.253692	0.156197	0.129917	0.10661	0.142445		0.307277	0.264526	0.298207	0.297835	0.415913	0.354101	0.355207	0.168956	0.155199	0.1521	0.266366	0.21657
27.0377	0.239318	0.226415	0.275346	0.26776	0.209305	0.170488	0.539493	0.555224	0.387168	0.613455	0.531366	0.555189	0.311468	0.266655	0.383889	0.231277	0.282436		0.065536	0.21703	0.164331	0.159873	0.117429	0.0762221		0.317258	0.288025	0.314479	0.301125	0.41194	0.378365	0.30817	0.22834	0.216979	0.156672	0.205495	0.256374
29.029	0.267102	0.246545	0.241088	0.213358	0.256581	0.18187	0.568314	0.608448	0.372954	0.655306	0.589104	0.576935	0.255792	0.276726	0.273005	0.143205	0.316688		0.0616409	0.200347	0.209567	0.156141	0.0739391	0.158842		0.293986	0.283615	0.339805	0.309141	0.393802	0.379767	0.361832	0.235408	0.151269	0.226535	0.190755	0.161254
31.0323	0.285511	0.24732	0.295382	0.26264	0.224493	0.224778	0.589214	0.630845	0.398957	0.587142	0.568251	0.56356	0.264479	0.249031	0.392609	0.250501	0.400049		0.11819	0.204708	0.203236	0.250687	0.11937	0.100079		0.30547	0.292641	0.343415	0.298326	0.397236	0.412936	0.364186	0.162706	0.147964	0.22586	0.234749	0.272066
33.0356	0.29059	0.241854	0.255222	0.23733	0.24703	0.213295	0.575836	0.601615	0.418264	0.62358	0.596963	0.54956	0.22794	0.27561	0.38488	0.237042	0.286309		0.0421916	0.209309	0.202409	0.128666	0.111126	0.0628564		0.320243	0.310929	0.349	0.312885	0.390623	0.39625	0.380986	0.195806	0.16221	0.199394	0.161935	0.273177
35.0268	0.225451	0.247681	0.257046	0.255406	0.230873	0.235391	0.580792	0.604138	0.395145	0.596697	0.609767	0.546115	0.281812	0.273338	0.330965	0.182771	0.198055		0.0908725	0.223356	0.173841	0.187793	0.148259	0.0981435		0.336665	0.299094	0.340807	0.329638	0.375919	0.397279	0.388533	0.193029	0.183418	0.207199	0.233377	0.342995
37.0301	0.268614	0.297624	0.26273	0.216796	0.274259	0.238509	0.546733	0.613329	0.424141	0.648644	0.598859	0.56647	0.256819	0.230219	0.363958	0.204084	0.305683		0.0676548	0.266437	0.205908	0.14914	0.119604	0.191456		0.346173	0.296819	0.33037	0.366017	0.420197	0.448362	0.362365	0.236719	0.160425	0.199469	0.213967	0.213667
39.0334	0.162964	0.302826	0.297008	0.279436	0.251384	0.236888	0.56645	0.612055	0.456827	0.65568	0.548703	0.560052	0.290581	0.23079	0.344438	0.246027	0.310047		0.0240246	0.201775	0.191566	0.167755	0.155951	0.079602		0.328988	0.314386	0.355324	0.350661	0.412533	0.442051	0.414449	0.261196	0.157173	0.205419	0.328477	0.241683
41.0367	0.205797	0.228663	0.287331	0.243501	0.264925	0.218552	0.600701	0.633463	0.429167	0.607973	0.641133	0.601438	0.314458	0.234336	0.387282	0.240061	0.296978		0.119919	0.213614	0.248166	0.186151	0.158704	0.0996784		0.317234	0.317126	0.350463	0.349252	0.407795	0.402443	0.417475	0.2865	0.149963	0.155921	0.244963	0.184074
43.04	0.265118	0.302882	0.302185	0.180934	0.313752	0.257552	0.632627	0.645109	0.451336	0.641926	0.629664	0.608707	0.335602	0.278418	0.357782	0.2851	0.367583		0.0490917	0.195386	0.203342	0.174408	0.149351	0.114908		0.310345	0.335676	0.367158	0.35228	0.414035	0.418395	0.401487	0.206657	0.169806	0.184797	0.295474	0.207153
45.0433	0.248086	0.240164	0.304971	0.290294	0.288432	0.273768	0.602448	0.648723	0.446942	0.616568	0.620829	0.595421	0.266482	0.250622	0.329594	0.310273	0.334028		0.0187379	0.277765	0.231064	0.200172	0.090189	0.151353		0.354181	0.338698	0.389772	0.366314	0.460851	0.400223	0.388053	0.231187	0.153522	0.18796	0.216281	0.254603
47.0346	0.233356	0.263347	0.303263	0.245911	0.396955	0.196896	0.59603	0.685001	0.453172	0.615217	0.626915	0.585261	0.30971	0.306433	0.38628	0.23705	0.351851		0.0281321	0.218908	0.215395	0.181671	0.101326	0.096653		0.352009	0.339075	0.383483	0.351019	0.479999	0.43277	0.422383	0.245198	0.194624	0.188563	0.320853	0.16191
49.0391	0.245543	0.268801	0.301873	0.226137	0.263645	0.291603	0.596037	0.649083	0.466631	0.639416	0.609735	0.599262	0.343966	0.299516	0.426274	0.205904	0.289493		0.0655099	0.13977	0.208265	0.170791	0.063709	0.0850691		0.354611	0.331748	0.370151	0.342969	0.443004	0.423768	0.407497	0.233673	0.187431	0.187843	0.211965	0.175022
51.0424	0.237641	0.232616	0.294768	0.281075	0.230177	0.273901	0.596567	0.68576	0.484108	0.720948	0.629737	0.616461	0.345968	0.24258	0.345483	0.210837	0.292005		0.0123409	0.284216	0.221479	0.208371	0.121416	0.158925		0.374889	0.346342	0.402388	0.386085	0.469171	0.439383	0.432332	0.311242	0.230577	0.193016	0.308914	0.187046
53.0457	0.344479	0.29837	0.326176	0.288939	0.331946	0.31046	0.626281	0.68764	0.503262	0.644763	0.618709	0.602833	0.25659	0.275233	0.324546	0.246114	0.325885		-0.0662748	0.191193	0.257815	0.203068	0.08855	0.0898566		0.391237	0.351729	0.412658	0.38695	0.505566	0.456033	0.440686	0.266382	0.177203	0.2267	0.240707	0.240817
55.0369	0.234154	0.270646	0.276148	0.270349	0.297778	0.270534	0.599742	0.67349	0.477178	0.622786	0.657877	0.634057	0.343198	0.26705	0.372084	0.232847	0.263842		0.0169401	0.26312	0.30924	0.193332	0.190403	0.180951		0.402128	0.364741	0.407185	0.406038	0.496375	0.455503	0.440608	0.245258	0.0731831	0.27751	0.272053	0.244314
57.0402	0.340854	0.32926	0.273832	0.26081	0.332066	0.273854	0.616043	0.713113	0.491288	0.6773	0.683736	0.615802	0.307146	0.272231	0.368192	0.220717	0.309224		0.0367694	0.2559	0.2463	0.205049	0.108289	0.095528		0.374204	0.336881	0.423525	0.410999	0.464132	0.472521	0.422118	0.273793	0.182063	0.241164	0.278573	0.218709
59.0435	0.310526	0.258964	0.292945	0.326654	0.255635	0.219421	0.587306	0.672487	0.471034	0.721669	0.685016	0.634725	0.325927	0.305844	0.332797	0.263286	0.296379		0.0950062	0.225696	0.219721	0.177649	0.12826	0.154309		0.388322	0.351019	0.412216	0.396834	0.489486	0.465881	0.42705	0.260597	0.211513	0.221676	0.211955	0.14095
61.0468	0.322587	0.352513	0.265196	0.209713	0.289089	0.302256	0.64573	0.703256	0.474622	0.689556	0.664789	0.661767	0.330714	0.279186	0.353791	0.234955	0.345465		0.0422971	0.302161	0.257468	0.15595	0.123725	0.209582		0.425085	0.35834	0.441196	0.411988	0.463286	0.473518	0.420783	0.227064	0.222345	0.207019	0.287366	0.263294
63.0501	0.29362	0.294177	0.263777	0.271392	0.313482	0.302816	0.620954	0.686807	0.511764	0.670046	0.682272	0.654124	0.272979	0.276085	0.351956	0.266373	0.310491		0.0944002	0.262259	0.274123	0.208621	0.176137	0.179934		0.372569	0.352925	0.408533	0.415426	0.482129	0.491191	0.442052	0.276031	0.233428	0.246931	0.176341	0.224264
65.0534	0.294798	0.365042	0.277588	0.260319	0.289912	0.277615	0.652735	0.690058	0.510904	0.672769	0.692737	0.66972	0.307083	0.330804	0.407505	0.2248	0.285504		0.0781676	0.294549	0.245551	0.215677	0.130932	0.156772		0.414672	0.351488	0.41606	0.456468	0.490952	0.496159	0.440285	0.239219	0.150606	0.213959	0.23167	0.233416
67.0446	0.308866	0.326726	0.313622	0.296785	0.263531	0.278465	0.642925	0.716045	0.507027	0.707219	0.704781	0.699501	0.305292	0.304969	0.338859	0.235453	0.296101		0.114486	0.266892	0.242521	0.207614	0.0605971	0.0739322		0.396024	0.372258	0.424152	0.443276	0.503141	0.522132	0.426537	0.277631	0.203154	0.262567	0.258891	0.16526
69.0479	0.305878	0.344882	0.322745	0.327153	0.280693	0.241888	0.697102	0.709102	0.527335	0.662853	0.691834	0.684694	0.31183	0.256076	0.357975	0.303025	0.349633		0.0967362	0.259664	0.204437	0.157138	0.151492	0.142128		0.446592	0.37583	0.403025	0.424452	0.503043	0.532418	0.45526	0.231726	0.189447	0.205051	0.232708	0.153725
71.0512	0.254471	0.390308	0.292743	0.309727	0.31896	0.298063	0.674639	0.71884	0.521625	0.67596	0.736267	0.674843	0.317207	0.32165	0.359994	0.29228	0.31757		-0.00211551	0.250626	0.267909	0.222112	0.166639	0.167467		0.439568	0.379811	0.437717	0.428823	0.495177	0.5046	0.463407	0.307782	0.136629	0.198617	0.262532	0.231732
73.0546	0.288362	0.35148	0.326747	0.314288	0.334893	0.308317	0.638932	0.706534	0.523702	0.691677	0.726291	0.654919	0.33465	0.295263	0.446062	0.287833	0.292718		0.107863	0.270283	0.232951	0.206728	0.153387	0.178317		0.461496	0.372385	0.415914	0.417055	0.527411	0.526839	0.441223	0.245908	0.23331	0.216594	0.214997	0.256551
75.0458	0.259278	0.381868	0.287875	0.252091	0.385066	0.23271	0.672018	0.72795	0.547616	0.721078	0.726211	0.671328	0.363243	0.271138	0.305754	0.201896	0.407247		0.12572	0.294307	0.256958	0.211384	0.178539	0.116732		0.418613	0.402868	0.465861	0.419484	0.473506	0.52309	0.438414	0.256232	0.22638	0.283661	0.203513	0.273067
77.0491	0.356688	0.339984	0.3085	0.343566	0.291704	0.224972	0.692151	0.733452	0.538572	0.766363	0.697529	0.685631	0.348243	0.318631	0.400877	0.267028	0.381337		0.0852616	0.270076	0.284531	0.268602	0.0968561	0.158306		0.449276	0.40137	0.43099	0.419832	0.525602	0.54167	0.442846	0.315214	0.140817	0.233177	0.281403	0.272971
79.0524	0.317775	0.429384	0.317923	0.257011	0.321699	0.298861	0.676379	0.714252	0.521084	0.765754	0.693256	0.654716	0.302151	0.273415	0.373956	0.305722	0.303165		0.0373196	0.264724	0.281836	0.226667	0.05792	0.149898		0.464728	0.39064	0.466746	0.45284	0.492831	0.56579	0.428743	0.238392	0.212371	0.20526	0.250824	0.225809
81.0557	0.31679	0.367512	0.287323	0.200531	0.327616	0.301358	0.653943	0.723464	0.520251	0.676251	0.728478	0.676729	0.373984	0.276006	0.432033	0.303046	0.327287		0.0240107	0.31904	0.280904	0.235726	0.159398	0.218763		0.454922	0.411648	0.453091	0.452355	0.550845	0.531751	0.448503	0.222329	0.161894	0.284217	0.222054	0.214199
83.0602	0.335542	0.30585	0.330284	0.27904	0.329774	0.274352	0.656353	0.723815	0.550502	0.724071	0.747655	0.699849	0.308392	0.306443	0.4502	0.218132	0.284631		0.186595	0.260542	0.268063	0.227807	0.197082	0.163931		0.467027	0.423993	0.47298	0.45239	0.511638	0.509505	0.447076	0.296229	0.222863	0.199746	0.286601	0.297091
85.0514	0.277982	0.316254	0.300362	0.279671	0.319358	0.268256	0.689612	0.719076	0.552543	0.778743	0.736833	0.709472	0.329628	0.28747	0.459113	0.370397	0.295026		0.157468	0.298794	0.268845	0.212238	0.169175	0.140243		0.495524	0.404173	0.487577	0.433698	0.52605	0.554889	0.444804	0.353291	0.32717	0.25487	0.359936	0.224687
87.0547	0.260278	0.317181	0.368782	0.254886	0.358204	0.323648	0.687271	0.725106	0.572124	0.757953	0.783026	0.706376	0.344937	0.268858	0.420097	0.29041	0.350522		0.0815681	0.299228	0.313024	0.204214	0.173493	0.138245		0.476984	0.398841	0.498383	0.463894	0.524849	0.56853	0.469085	0.264833	0.221954	0.203504	0.308792	0.296975
89.058	0.295602	0.30993	0.325329	0.362891	0.283083	0.278906	0.67356	0.756452	0.564913	0.744182	0.780725	0.692071	0.323658	0.338062	0.444362	0.324792	0.295062		0.0394456	0.301968	0.249187	0.218289	0.213749	0.195162		0.476962	0.417674	0.49257	0.493079	0.531669	0.525409	0.497399	0.298832	0.21006	0.283523	0.312163	0.2276
91.0613	0.306276	0.312719	0.328511	0.315889	0.292878	0.326493	0.693105	0.769318	0.547673	0.754242	0.748141	0.709214	0.33279	0.237055	0.486365	0.255884	0.368555		0.106334	0.296326	0.344327	0.216736	0.128392	0.249855		0.498582	0.426264	0.499501	0.452053	0.56898	0.546548	0.487074	0.292667	0.215408	0.264744	0.306406	0.312821
93.0646	0.263666	0.33981	0.347263	0.264972	0.3365	0.310403	0.69586	0.746428	0.570763	0.80235	0.788332	0.724312	0.357536	0.304955	0.381758	0.319456	0.408627		0.0662464	0.274547	0.292607	0.195651	0.184469	0.213941		0.497748	0.427666	0.491285	0.474662	0.513061	0.568085	0.496756	0.324424	0.203639	0.269645	0.308674	0.277232
95.0559	0.394857	0.273251	0.339472	0.276264	0.310917	0.284247	0.708071	0.78856	0.574951	0.738279	0.73791	0.732746	0.362335	0.250674	0.417598	0.231781	0.416216		0.0341172	0.272765	0.287512	0.259972	0.147857	0.123107		0.514088	0.434866	0.516921	0.467938	0.550702	0.57408	0.458532	0.272913	0.240658	0.264596	0.298466	0.249241
97.0592	0.284036	0.409593	0.346109	0.342035	0.295879	0.298814	0.742528	0.761884	0.57625	0.725955	0.774882	0.735809	0.399028	0.321787	0.430863	0.194753	0.294517		0.0553665	0.220061	0.33577	0.209657	0.16489	0.199503		0.512372	0.446695	0.482087	0.479969	0.567172	0.555495	0.49353	0.25626	0.24916	0.267592	0.32444	0.368438
99.0625	0.34829	0.405901	0.343918	0.334387	0.346723	0.348377	0.722238	0.778842	0.5827	0.747645	0.738157	0.729467	0.389343	0.296821	0.463452	0.242108	0.362827		0.11741	0.268369	0.281219	0.253047	0.171121	0.21532		0.494765	0.41307	0.479438	0.498951	0.507327	0.53647	0.507724	0.274442	0.188924	0.250691	0.313362	0.274864
101.066	0.331737	0.351614	0.354191	0.29212	0.375762	0.289844	0.729306	0.782445	0.578278	0.732406	0.788257	0.666292	0.405877	0.298332	0.404049	0.302297	0.398983		0.0972648	0.270214	0.273399	0.186704	0.186474	0.151884		0.517527	0.445275	0.514319	0.50996	0.522724	0.559843	0.476567	0.306916	0.275656	0.252918	0.347162	0.325505
103.069	0.327302	0.373267	0.376552	0.376291	0.311055	0.270271	0.708163	0.760539	0.593831	0.75964	0.784973	0.736754	0.380118	0.288622	0.388455	0.278068	0.318524		0.112954	0.280436	0.348149	0.259244	0.181438	0.21371		0.51566	0.44616	0.505532	0.492417	0.567024	0.582147	0.481979	0.264049	0.237604	0.291093	0.351212	0.25744
105.06	0.282816	0.285524	0.350332	0.327397	0.352066	0.315865	0.720963	0.762922	0.605045	0.781636	0.781431	0.747448	0.366344	0.305339	0.405907	0.30066	0.420933		0.0818599	0.254509	0.289216	0.279741	0.1016	0.251277		0.495937	0.463472	0.493655	0.481962	0.570805	0.581394	0.454987	0.271958	0.238695	0.230217	0.331834	0.334873
107.064	0.305567	0.343498	0.345004	0.277636	0.330917	0.32621	0.725374	0.750919	0.598174	0.749011	0.782143	0.696022	0.344661	0.354328	0.406796	0.302941	0.393136		0.147994	0.295814	0.269469	0.276589	0.173362	0.145694		0.505181	0.483297	0.490242	0.48941	0.546744	0.596511	0.477107	0.255997	0.21486	0.300263	0.314334	0.220637
109.067	0.329693	0.38208	0.33557	0.291373	0.369664	0.327796	0.735929	0.766166	0.575303	0.722995	0.727371	0.718202	0.416582	0.290726	0.410543	0.290579	0.36428		0.10829	0.282235	0.261793	0.226291	0.199158	0.202158		0.525497	0.463388	0.481588	0.50652	0.553565	0.574574	0.49941	0.30772	0.232744	0.297728	0.307506	0.418065
111.07	0.328464	0.314424	0.379563	0.259852	0.459653	0.28895	0.726353	0.795732	0.593008	0.786025	0.77361	0.726109	0.353321	0.281589	0.439022	0.263578	0.341046		0.0857387	0.284626	0.283839	0.251225	0.0745886	0.182724		0.517622	0.43638	0.51488	0.549892	0.565113	0.608385	0.509362	0.262922	0.244019	0.203562	0.339587	0.33645
113.073	0.364502	0.391244	0.333405	0.378851	0.333424	0.315554	0.783891	0.754294	0.594839	0.743476	0.827281	0.711652	0.321432	0.342585	0.391897	0.311543	0.317541		0.102857	0.275321	0.291103	0.311941	0.239164	0.214802		0.527894	0.473692	0.502932	0.535075	0.582708	0.569315	0.554637	0.311856	0.194285	0.290522	0.321164	0.261031
115.078	0.315122	0.350631	0.364561	0.373797	0.307069	0.317629	0.700962	0.735158	0.590319	0.729203	0.813529	0.724829	0.332794	0.333148	0.424922	0.289533	0.324674		0.193116	0.272969	0.307832	0.239791	0.276728	0.232552		0.518494	0.493053	0.509059	0.544655	0.549466	0.611536	0.493855	0.210388	0.251245	0.26514	0.282117	0.221733
117.068	0.316639	0.34183	0.336103	0.322929	0.356901	0.279477	0.686804	0.754311	0.6096	0.792232	0.808952	0.705083	0.346685	0.35342	0.404429	0.312094	0.365233		0.220769	0.260859	0.333739	0.268096	0.109885	0.219037		0.536436	0.455647	0.507618	0.530445	0.549869	0.573199	0.497504	0.306362	0.245785	0.228082	0.328006	0.27305
119.073	0.311103	0.283369	0.367109	0.316437	0.380972	0.313375	0.758425	0.783024	0.632083	0.79928	0.832553	0.734616	0.378067	0.30179	0.470381	0.28326	0.321514		0.121195	0.30655	0.31345	0.23157	0.145133	0.208702		0.52134	0.491364	0.537033	0.51426	0.61052	0.602986	0.514106	0.277487	0.217101	0.264543	0.297478	0.275334
121.076	0.32409	0.432808	0.423211	0.349675	0.349789	0.324517	0.744474	0.738572	0.593798	0.731553	0.765025	0.78173	0.36043	0.296112	0.43561	0.32211	0.310565		0.155852	0.2793	0.347283	0.218908	0.157794	0.132637		0.533608	0.489534	0.541393	0.532501	0.560326	0.602049	0.535351	0.405931	0.234207	0.265316	0.336601	0.258705
123.079	0.330828	0.401913	0.446604	0.367739	0.354679	0.272587	0.768471	0.745043	0.613307	0.762207	0.789254	0.727741	0.33059	0.339824	0.453139	0.297753	0.372589		0.0652974	0.276447	0.331326	0.251648	0.119925	0.157659		0.523661	0.486208	0.515893	0.542327	0.588015	0.607883	0.467265	0.292513	0.296281	0.264429	0.339369	0.253939
125.082	0.338319	0.407963	0.349531	0.387995	0.312597	0.308981	0.727632	0.798818	0.616641	0.812088	0.86066	0.713083	0.344642	0.325135	0.456208	0.22303	0.305789		0.260276	0.295813	0.270688	0.246706	0.170474	0.152577		0.533402	0.512811	0.520559	0.557487	0.601124	0.584306	0.513093	0.29706	0.246871	0.274386	0.396011	0.274629
127.074	0.358491	0.351037	0.381166	0.40228	0.366134	0.303458	0.747785	0.742786	0.634108	0.786109	0.766553	0.726398	0.426648	0.379904	0.452074	0.257118	0.408925		0.145001	0.289297	0.274523	0.26306	0.200005	0.137545		0.501705	0.483985	0.523169	0.555943	0.609326	0.601756	0.547762	0.301312	0.238631	0.276778	0.287768	0.259918
129.077	0.354636	0.346508	0.353998	0.335341	0.35919	0.352757	0.74528	0.787598	0.6075	0.841878	0.821144	0.768967	0.428077	0.37586	0.440546	0.332477	0.376961		0.1338	0.331222	0.302712	0.218126	0.244195	0.226873		0.521418	0.498019	0.528122	0.555904	0.585401	0.604247	0.555183	0.271496	0.213503	0.258887	0.304675	0.261213
131.08	0.372624	0.338454	0.338683	0.302715	0.343831	0.289755	0.799697	0.772872	0.635038	0.813228	0.857577	0.708509	0.312256	0.299467	0.443365	0.256861	0.289707		0.148633	0.312813	0.296494	0.270349	0.132325	0.178942		0.52179	0.497868	0.558026	0.57146	0.659155	0.588567	0.543712	0.246226	0.314605	0.259584	0.340029	0.313525
133.084	0.347072	0.345775	0.409011	0.357916	0.309972	0.365005	0.799267	0.816503	0.613669	0.792947	0.863924	0.78943	0.342179	0.298498	0.470492	0.259589	0.402306		0.191998	0.333449	0.285184	0.292882	0.25653	0.16297		0.49124	0.471471	0.532895	0.55634	0.583764	0.572979	0.557011	0.275048	0.304224	0.269564	0.34271	0.242554
135.087	0.380322	0.378007	0.375449	0.347822	0.322834	0.401164	0.797035	0.786622	0.649781	0.826025	0.793999	0.763725	0.378631	0.327421	0.413957	0.286689	0.381146		0.195863	0.346971	0.307565	0.296292	0.15801	0.199014		0.502336	0.491801	0.538569	0.591988	0.619246	0.592132	0.524872	0.359061	0.26246	0.260706	0.394477	0.340597
137.078	0.352123	0.31562	0.405493	0.359926	0.347771	0.373702	0.760133	0.797295	0.614544	0.819877	0.852355	0.740566	0.392852	0.280266	0.536676	0.317211	0.328698		0.156463	0.228561	0.265487	0.335679	0.14096	0.234446		0.537098	0.506501	0.542022	0.539367	0.606128	0.59931	0.552036	0.292133	0.330677	0.23238	0.340629	0.313211
139.082	0.41438	0.383558	0.353936	0.372018	0.298211	0.379067	0.727084	0.784217	0.631051	0.768341	0.811483	0.749075	0.429701	0.320803	0.414274	0.287871	0.3266		0.112494	0.234685	0.252302	0.305949	0.122701	0.215456		0.551395	0.501966	0.543432	0.567296	0.587057	0.625984	0.552409	0.324037	0.296886	0.233447	0.343653	0.320897
141.085	0.389047	0.431177	0.403559	0.396705	0.320319	0.340224	0.786464	0.730761	0.616782	0.840493	0.801794	0.775405	0.396769	0.300557	0.417951	0.269294	0.379761		0.16415	0.288373	0.256687	0.326479	0.0905889	0.114057		0.541017	0.543068	0.557675	0.599265	0.632805	0.638425	0.518346	0.337961	0.301128	0.230118	0.37858	0.291419
143.088	0.38479	0.408594	0.348993	0.281546	0.3722	0.322742	0.774997	0.771527	0.615454	0.808624	0.837638	0.760688	0.361688	0.334032	0.414478	0.311673	0.322453		0.197016	0.347254	0.297963	0.356531	0.245393	0.208457		0.518621	0.504617	0.562589	0.582523	0.601048	0.640577	0.584249	0.333485	0.319892	0.259372	0.364791	0.298633
145.091	0.367827	0.420108	0.398837	0.355882	0.382007	0.343215	0.767785	0.769573	0.636025	0.842939	0.859006	0.728527	0.309718	0.321676	0.484835	0.25183	0.363974		0.293552	0.333619	0.281549	0.19379	0.178212	0.230435		0.558455	0.540112	0.570856	0.564958	0.581125	0.597335	0.541695	0.310143	0.258602	0.212296	0.379948	0.3282
147.083	0.358892	0.403853	0.367865	0.343781	0.337188	0.368807	0.764869	0.823323	0.643996	0.796726	0.856246	0.717799	0.371705	0.427291	0.407121	0.319213	0.406721		0.211537	0.297776	0.301076	0.271309	0.209681	0.213089		0.58503	0.558398	0.578139	0.590632	0.612925	0.590883	0.560317	0.37996	0.24875	0.226696	0.342938	0.372301
149.086	0.36466	0.42654	0.389214	0.324122	0.39241	0.350204	0.768481	0.763447	0.641885	0.87146	0.795099	0.747846	0.426323	0.397343	0.541526	0.274915	0.355299		0.321395	0.255287	0.279176	0.22279	0.237028	0.220939		0.564487	0.540149	0.557183	0.583574	0.625284	0.636413	0.559261	0.308199	0.270771	0.288426	0.376219	0.309446
151.09	0.329644	0.353912	0.406156	0.383269	0.397562	0.28551	0.788761	0.764822	0.668353	0.788349	0.826288	0.760338	0.399622	0.291432	0.455965	0.336602	0.293313		0.22318	0.268257	0.259483	0.261611	0.157058	0.233601		0.553418	0.543353	0.603169	0.590766	0.642599	0.645269	0.597687	0.329864	0.290595	0.257008	0.279751	0.384455
153.094	0.381384	0.367741	0.345349	0.411341	0.387154	0.342758	0.772842	0.790458	0.665194	0.83302	0.811363	0.760368	0.465848	0.413012	0.479932	0.248639	0.346476		0.321298	0.285764	0.293047	0.307488	0.16084	0.159513		0.567644	0.520486	0.590017	0.595223	0.638599	0.661706	0.562293	0.378936	0.202635	0.27413	0.354631	0.308999
155.097	0.33456	0.465204	0.403459	0.30656	0.380818	0.369542	0.775736	0.728357	0.631305	0.815012	0.833285	0.783082	0.420015	0.356967	0.499276	0.359468	0.382842		0.254796	0.283134	0.298416	0.287299	0.159988	0.192206		0.55785	0.533582	0.583752	0.600163	0.59546	0.679396	0.544312	0.307309	0.251426	0.306012	0.363669	0.351444
157.088	0.361227	0.479632	0.346372	0.33468	0.377475	0.42591	0.791141	0.825378	0.70239	0.856008	0.881585	0.762818	0.43763	0.386297	0.488812	0.298425	0.296249		0.17939	0.294409	0.295201	0.281992	0.219809	0.166415		0.604456	0.544219	0.590976	0.586339	0.601683	0.609447	0.548722	0.301298	0.267912	0.270301	0.354161	0.367312
159.091	0.390074	0.319361	0.377943	0.362925	0.354205	0.366281	0.800604	0.814774	0.646793	0.833998	0.880055	0.779618	0.429436	0.36624	0.452753	0.364489	0.300941		0.228513	0.296303	0.28043	0.274784	0.191429	0.268642		0.568136	0.537288	0.580988	0.59219	0.602283	0.668303	0.576684	0.402077	0.233475	0.248486	0.382684	0.255397
161.095	0.334465	0.31999	0.405605	0.259483	0.343827	0.285538	0.796155	0.805586	0.658065	0.848437	0.87271	0.791978	0.360383	0.340701	0.406662	0.280318	0.357093		0.216484	0.337538	0.275827	0.244589	0.229349	0.187358		0.598445	0.553906	0.579463	0.613645	0.615108	0.643933	0.532826	0.370124	0.332722	0.30104	0.32252	0.319957
163.098	0.381332	0.388759	0.419185	0.352795	0.396808	0.318876	0.798967	0.815867	0.66325	0.846569	0.818362	0.778542	0.422215	0.29491	0.507984	0.275333	0.390192		0.267224	0.284028	0.303502	0.278575	0.2055	0.293836		0.585772	0.565942	0.580832	0.611587	0.64242	0.634421	0.536289	0.359297	0.26061	0.185195	0.408314	0.367634
165.101	0.362321	0.333487	0.458362	0.350229	0.407156	0.419545	0.794464	0.813504	0.682943	0.854918	0.853637	0.802889	0.452843	0.417831	0.445461	0.266766	0.337368		0.250041	0.321198	0.238842	0.282726	0.235233	0.216562		0.585575	0.54211	0.579561	0.612898	0.611194	0.645136	0.584383	0.308047	0.260606	0.257826	0.436983	0.313652
167.093	0.373717	0.313886	0.402783	0.321762	0.361899	0.423543	0.804993	0.79652	0.685036	0.791184	0.872438	0.779656	0.483444	0.386687	0.499762	0.3741	0.343091		0.305724	0.270907	0.228273	0.238305	0.210863	0.18694		0.579405	0.600253	0.579366	0.63415	0.60484	0.637071	0.521482	0.290112	0.285857	0.271764	0.315533	0.314324
169.096	0.40747	0.366176	0.40121	0.40405	0.369591	0.363794	0.821904	0.808221	0.685995	0.839813	0.823497	0.757956	0.41686	0.353795	0.407539	0.25964	0.365648		0.264235	0.317193	0.323689	0.202607	0.211151	0.250981		0.586741	0.575469	0.606706	0.624074	0.629923	0.667347	0.544002	0.182087	0.332797	0.256376	0.393549	0.275389
171.099	0.419206	0.385582	0.444894	0.34934	0.400722	0.422015	0.8307	0.800385	0.678531	0.863394	0.878284	0.829377	0.45143	0.354723	0.488498	0.336802	0.376134		0.269106	0.327545	0.269277	0.294524	0.2907	0.209965		0.589509	0.572001	0.561531	0.618988	0.682665	0.65398	0.558529	0.256855	0.26212	0.223316	0.372267	0.25566
173.103	0.378387	0.317665	0.4331	0.357567	0.453168	0.385866	0.816503	0.817581	0.684581	0.818653	0.888599	0.814326	0.444792	0.327839	0.507102	0.396329	0.353512		0.202287	0.261103	0.241804	0.237365	0.186178	0.284134		0.583489	0.569651	0.583269	0.639987	0.642938	0.651695	0.577045	0.249807	0.296222	0.257297	0.289546	0.386634
175.106	0.428392	0.380734	0.431993	0.384424	0.434654	0.405858	0.842748	0.834146	0.665791	0.823192	0.83783	0.819601	0.442118	0.381988	0.485105	0.3794	0.326191		0.25982	0.246585	0.308913	0.289718	0.207163	0.246662		0.572043	0.602905	0.609139	0.628057	0.635172	0.655701	0.607435	0.314707	0.365584	0.276234	0.344947	0.372167
177.097	0.366437	0.382518	0.396682	0.322615	0.378047	0.355189	0.810845	0.787515	0.680234	0.87549	0.814202	0.759973	0.387755	0.401553	0.495487	0.334841	0.350313		0.250623	0.281564	0.292054	0.217649	0.289672	0.225738		0.572319	0.585663	0.618153	0.648747	0.617497	0.627502	0.60322	0.342378	0.293545	0.315083	0.287847	0.278658
179.1	0.363486	0.439125	0.44978	0.384275	0.442219	0.330712	0.788562	0.826272	0.672409	0.806902	0.885523	0.734348	0.418374	0.356641	0.454481	0.355268	0.328022		0.268477	0.31955	0.255997	0.21388	0.243519	0.197092		0.571389	0.581815	0.566524	0.629904	0.674991	0.667237	0.577837	0.322594	0.370463	0.270535	0.391094	0.269806
181.104	0.375829	0.401016	0.39943	0.362354	0.419472	0.39277	0.794157	0.794921	0.692714	0.815083	0.888279	0.75773	0.403316	0.328149	0.493847	0.367484	0.404777		0.27061	0.292248	0.269417	0.268958	0.273302	0.244514		0.631022	0.574388	0.569479	0.607578	0.638336	0.692422	0.630815	0.357417	0.327386	0.252374	0.367389	0.355494
183.108	0.362787	0.468845	0.385925	0.309026	0.401676	0.435775	0.804974	0.823075	0.68713	0.817277	0.815824	0.747706	0.451199	0.437868	0.482688	0.350791	0.274479		0.205983	0.287694	0.292311	0.269183	0.239915	0.238984		0.612708	0.573063	0.592798	0.618506	0.65118	0.687517	0.602723	0.262895	0.381122	0.240659	0.369114	0.344896
185.098	0.349473	0.340569	0.485537	0.346543	0.335717	0.44841	0.857442	0.799801	0.681826	0.906306	0.887678	0.797262	0.430947	0.385288	0.550296	0.421682	0.40947		0.125356	0.273177	0.273063	0.337516	0.239078	0.211599		0.597682	0.572913	0.577367	0.622482	0.629779	0.694834	0.596503	0.29369	0.396549	0.263486	0.385335	0.288677
187.103	0.402785	0.381464	0.477513	0.441486	0.410149	0.427996	0.860728	0.783382	0.689015	0.869698	0.908671	0.77659	0.441524	0.365962	0.473017	0.329044	0.398998		0.216377	0.326713	0.289669	0.364544	0.168432	0.222691		0.605658	0.586416	0.595396	0.634504	0.659308	0.672383	0.599961	0.295111	0.328872	0.311853	0.421257	0.303701
189.106	0.395444	0.426228	0.412231	0.419649	0.359438	0.414796	0.835965	0.791332	0.702452	0.859121	0.891371	0.770998	0.48513	0.398718	0.48451	0.402232	0.434001		0.262214	0.341111	0.25145	0.321086	0.205608	0.292539		0.608449	0.582774	0.625517	0.674755	0.656704	0.690073	0.582545	0.275688	0.32905	0.330926	0.419126	0.312335
191.109	0.420713	0.392073	0.388031	0.417451	0.349053	0.486936	0.839725	0.788105	0.686167	0.836737	0.885174	0.779793	0.493856	0.38474	0.50865	0.287984	0.408079		0.252166	0.274398	0.300061	0.297656	0.318666	0.237363		0.605173	0.564768	0.58095	0.637522	0.665678	0.665719	0.632092	0.349688	0.325634	0.306228	0.429526	0.303332
193.113	0.436524	0.423473	0.415905	0.403311	0.36986	0.531475	0.826357	0.817486	0.712976	0.900038	0.844193	0.813211	0.426231	0.368134	0.49744	0.449576	0.5045		0.302921	0.333836	0.305764	0.25335	0.355953	0.118709		0.632038	0.587394	0.61478	0.609928	0.636048	0.703765	0.605701	0.311659	0.314272	0.29095	0.457831	0.286744
195.104	0.390816	0.330686	0.451283	0.420816	0.418646	0.423518	0.80301	0.825792	0.744658	0.870709	0.775246	0.805587	0.477699	0.355244	0.526315	0.262292	0.514399		0.320713	0.271326	0.357977	0.317145	0.231272	0.205608		0.620353	0.580182	0.616301	0.604733	0.670965	0.673586	0.632884	0.310136	0.353044	0.163325	0.432022	0.35198
197.119	0.377852	0.430344	0.460441	0.41028	0.33767	0.43295	0.824615	0.834998	0.741092	0.869134	0.857189	0.815495	0.451567	0.369583	0.512918	0.353706	0.386577		0.215298	0.286207	0.260426	0.311287	0.238071	0.244632		0.625487	0.579698	0.608413	0.654911	0.663891	0.641032	0.639495	0.246701	0.301047	0.272	0.276433	0.300249
199.111	0.432016	0.397394	0.422414	0.399556	0.421608	0.445031	0.836931	0.815465	0.692414	0.83706	0.825545	0.812781	0.388625	0.375668	0.516475	0.311588	0.421718		0.236438	0.406278	0.304992	0.345918	0.261653	0.229029		0.62479	0.620966	0.607925	0.652198	0.662042	0.662845	0.614366	0.30865	0.364144	0.208662	0.416636	0.293258
201.114	0.367792	0.404151	0.484521	0.404041	0.334411	0.39965	0.873237	0.83862	0.713203	0.881341	0.897373	0.762993	0.405652	0.428613	0.531662	0.371232	0.404751		0.278004	0.317117	0.330845	0.297162	0.347672	0.24736		0.625388	0.607055	0.599436	0.64375	0.695314	0.673308	0.619774	0.338338	0.357418	0.336845	0.33643	0.316965
203.117	0.405664	0.435768	0.39952	0.351312	0.416597	0.453997	0.825292	0.814119	0.715829	0.844738	0.897498	0.773608	0.485903	0.383278	0.521603	0.372038	0.52364		0.243728	0.323928	0.309524	0.309374	0.234925	0.273168		0.625502	0.61298	0.613548	0.645101	0.684225	0.660191	0.58517	0.367716	0.302441	0.284064	0.394204	0.290239
205.12	0.491733	0.428473	0.422351	0.336329	0.3882	0.473141	0.851271	0.817633	0.717866	0.832204	0.878301	0.767617	0.446575	0.339624	0.50644	0.326055	0.460881		0.267731	0.372331	0.306432	0.291672	0.263562	0.215312		0.58142	0.602705	0.620015	0.620329	0.66126	0.654412	0.587491	0.33188	0.398787	0.262416	0.428653	0.295758
207.112	0.375086	0.378664	0.498407	0.35095	0.38958	0.42609	0.82382	0.873737	0.700963	0.820484	0.860012	0.791173	0.43059	0.372472	0.479239	0.320782	0.324071		0.299522	0.367568	0.295618	0.263765	0.244999	0.241367		0.616425	0.575936	0.626618	0.646766	0.682329	0.691592	0.668032	0.308403	0.379848	0.287072	0.41609	0.385972
209.115	0.395995	0.41613	0.506697	0.336187	0.388732	0.46479	0.832181	0.82511	0.713517	0.822663	0.879619	0.818755	0.511596	0.3353	0.491517	0.440955	0.439107		0.328747	0.260092	0.348691	0.254595	0.164669	0.324073		0.639622	0.605675	0.628489	0.647345	0.644007	0.670264	0.613654	0.287539	0.399137	0.355556	0.40534	0.292972
211.118	0.386906	0.477884	0.434039	0.413976	0.439272	0.464062	0.846257	0.855178	0.70968	0.808714	0.897884	0.758189	0.419582	0.437011	0.46519	0.329231	0.424105		0.26519	0.285634	0.307851	0.320341	0.286986	0.322639		0.638807	0.63897	0.630914	0.646053	0.68219	0.728003	0.653645	0.333995	0.331801	0.28511	0.385433	0.336047
213.122	0.380802	0.51726	0.364459	0.38507	0.397901	0.436773	0.825575	0.84334	0.740138	0.874963	0.918613	0.756077	0.43062	0.388409	0.541888	0.447915	0.443534		0.241447	0.350472	0.273507	0.294874	0.3154	0.235536		0.635672	0.599547	0.625729	0.665017	0.68062	0.678089	0.664244	0.332491	0.335923	0.272577	0.383244	0.301871
215.113	0.3799	0.390663	0.465724	0.394474	0.368122	0.413795	0.851023	0.820044	0.733171	0.899155	0.902931	0.800758	0.494359	0.354489	0.494074	0.387099	0.434827		0.260861	0.351374	0.353373	0.27137	0.250101	0.243058		0.674679	0.615298	0.647661	0.663755	0.696826	0.696669	0.640512	0.352745	0.275111	0.296895	0.357202	0.264793
217.116	0.403386	0.408159	0.478828	0.387032	0.413492	0.339329	0.847603	0.861115	0.715153	0.850079	0.881382	0.767275	0.444845	0.386445	0.610375	0.390755	0.371226		0.272637	0.311292	0.347417	0.290474	0.27123	0.286712		0.691224	0.608762	0.630603	0.644581	0.702544	0.705443	0.63818	0.320842	0.34199	0.315919	0.402895	0.325443
219.121	0.396645	0.415473	0.395388	0.295014	0.41356	0.438545	0.848648	0.885401	0.732334	0.853531	0.884338	0.768357	0.437168	0.352641	0.580405	0.270645	0.391837		0.338549	0.310697	0.316565	0.337506	0.255778	0.289824		0.650476	0.599108	0.645687	0.651182	0.703495	0.72458	0.664864	0.339636	0.315943	0.306245	0.396451	0.362391
221.124	0.33654	0.476351	0.457	0.420741	0.41509	0.424074	0.86992	0.840499	0.714856	0.831952	0.892501	0.772728	0.481139	0.387922	0.4737	0.432188	0.398891		0.24621	0.332059	0.346027	0.243694	0.323596	0.307505		0.612736	0.605361	0.656761	0.626061	0.696536	0.700956	0.650699	0.283856	0.353954	0.346107	0.357074	0.298959
223.127	0.407857	0.432238	0.420648	0.338191	0.356413	0.445208	0.857807	0.859563	0.743388	0.880892	0.879198	0.796854	0.477837	0.343109	0.518003	0.387047	0.440659		0.250272	0.346311	0.29077	0.238739	0.202138	0.299048		0.647675	0.633424	0.609132	0.638132	0.65797	0.710557	0.62972	0.325767	0.442793	0.314594	0.394863	0.320801
225.118	0.494182	0.432808	0.428302	0.359563	0.420246	0.441884	0.833287	0.83509	0.740095	0.894607	0.899609	0.781863	0.380451	0.369089	0.582491	0.427943	0.289668		0.0995241	0.341755	0.382264	0.313523	0.276423	0.240336		0.636517	0.606267	0.635963	0.67603	0.653273	0.685198	0.657265	0.243652	0.372718	0.32801	0.364264	0.431948
227.122	0.417039	0.429355	0.538577	0.39375	0.408353	0.429276	0.854986	0.863002	0.723955	0.889696	0.943265	0.804057	0.498864	0.344621	0.535173	0.315247	0.431322		0.32944	0.309286	0.316669	0.306771	0.292884	0.203161		0.685418	0.599312	0.611546	0.640665	0.68592	0.681815	0.635652	0.248929	0.258121	0.348315	0.359915	0.272345
229.125	0.370956	0.448211	0.412741	0.364364	0.456921	0.440777	0.851092	0.863355	0.747056	0.821445	0.920456	0.801432	0.530268	0.380221	0.528352	0.45656	0.402651		0.275444	0.384811	0.322239	0.308332	0.217053	0.235694		0.642756	0.623405	0.627976	0.669477	0.640418	0.675101	0.639729	0.322159	0.29111	0.260767	0.437855	0.343881
231.128	0.407174	0.440815	0.436831	0.341788	0.35439	0.458351	0.830069	0.824809	0.736753	0.851473	0.924418	0.780214	0.439252	0.356791	0.551028	0.382385	0.431874		0.165529	0.29428	0.38955	0.302837	0.239412	0.285952		0.638439	0.609151	0.630623	0.678214	0.658031	0.707485	0.690758	0.347986	0.232957	0.308259	0.363909	0.291107
233.132	0.398747	0.478403	0.473688	0.409313	0.491568	0.427189	0.88117	0.853661	0.738774	0.858321	0.926598	0.793904	0.472058	0.344226	0.509857	0.448876	0.404177		0.272446	0.317992	0.32535	0.263346	0.293458	0.248266		0.627256	0.641536	0.623529	0.654633	0.675994	0.700937	0.685248	0.355207	0.364589	0.298906	0.46084	0.313782
235.123	0.365205	0.476713	0.498436	0.45751	0.354713	0.454763	0.870187	0.85596	0.746502	0.816936	0.860805	0.803534	0.494252	0.391875	0.525675	0.404904	0.366149		0.296573	0.30305	0.344197	0.301326	0.263559	0.183787		0.636396	0.660691	0.626105	0.695523	0.687721	0.69483	0.693973	0.289375	0.352642	0.273174	0.329655	0.431223
237.126	0.462697	0.479417	0.546673	0.354683	0.385341	0.460205	0.868127	0.879544	0.745393	0.83945	0.91192	0.831242	0.482897	0.395816	0.546713	0.347051	0.44971		0.266807	0.321803	0.355938	0.277989	0.313389	0.308994		0.641161	0.636813	0.627177	0.682971	0.669963	0.677456	0.678053	0.325572	0.345159	0.232468	0.373758	0.302635
239.13	0.451856	0.380539	0.495488	0.384778	0.465435	0.433986	0.864829	0.876531	0.701453	0.857482	0.871131	0.820138	0.466805	0.450775	0.553174	0.374633	0.377565		0.213574	0.322348	0.352484	0.336134	0.222769	0.258808		0.672459	0.639275	0.662397	0.689839	0.69333	0.667972	0.645338	0.32158	0.321538	0.272407	0.350331	0.35564
241.133	0.461497	0.407193	0.495607	0.345963	0.39789	0.515593	0.850648	0.859262	0.742704	0.887895	0.915835	0.811644	0.495794	0.400072	0.54254	0.383771	0.452509		0.252743	0.319332	0.324879	0.283096	0.283464	0.255422		0.643623	0.60051	0.643754	0.662484	0.698499	0.725584	0.657846	0.378303	0.39617	0.359444	0.344965	0.317031
243.136	0.406407	0.418413	0.491845	0.381488	0.412325	0.492472	0.838059	0.85933	0.725391	0.863708	0.88971	0.811105	0.523557	0.347495	0.554021	0.360827	0.405505		0.28293	0.382248	0.324886	0.279176	0.212819	0.293528		0.650257	0.666037	0.677802	0.671092	0.672925	0.686658	0.597976	0.329774	0.312543	0.257891	0.309646	0.288847
245.127	0.50308	0.49041	0.445198	0.400473	0.436006	0.476328	0.872867	0.859083	0.740126	0.838831	0.924303	0.781432	0.409064	0.423421	0.453936	0.460836	0.389965		0.296487	0.323934	0.419017	0.258533	0.290522	0.272677		0.699572	0.618894	0.652362	0.686313	0.701149	0.68869	0.682381	0.308886	0.327825	0.314625	0.385111	0.27792
247.131	0.405889	0.445615	0.526716	0.470401	0.472863	0.398499	0.850101	0.875193	0.753993	0.942979	0.919959	0.816922	0.456487	0.445723	0.575247	0.422325	0.41183		0.326774	0.348052	0.377817	0.345784	0.212797	0.295335		0.64219	0.63923	0.66233	0.686577	0.676366	0.675367	0.676077	0.370436	0.402559	0.299667	0.369788	0.348344
249.134	0.382592	0.466006	0.462114	0.437001	0.419211	0.503263	0.839848	0.856019	0.782682	0.945625	0.944286	0.774883	0.436216	0.484958	0.588948	0.365643	0.48256		0.32609	0.334101	0.424436	0.362446	0.312802	0.204019		0.612061	0.673774	0.649869	0.696012	0.696166	0.688561	0.69303	0.321461	0.338438	0.267089	0.426335	0.240605
251.138	0.480287	0.469236	0.535706	0.402802	0.40525	0.499096	0.870608	0.865492	0.72483	0.925487	0.915541	0.820369	0.517341	0.369683	0.616661	0.429525	0.460393		0.279687	0.331524	0.379516	0.355871	0.225306	0.290171		0.676285	0.647203	0.624426	0.695902	0.707029	0.684033	0.683064	0.37922	0.335375	0.279533	0.406237	0.301459
253.142	0.38869	0.45484	0.49595	0.474069	0.428303	0.469854	0.865819	0.849292	0.738837	0.933525	0.941921	0.836117	0.452489	0.453147	0.537766	0.417479	0.442039		0.282	0.338145	0.369944	0.337521	0.259465	0.275573		0.669624	0.666028	0.639114	0.678496	0.702463	0.644495	0.684193	0.346903	0.336165	0.313841	0.417135	0.313622
255.145	0.463585	0.438628	0.517145	0.487999	0.389459	0.426451	0.863076	0.851445	0.780854	0.922193	0.908281	0.80702	0.524586	0.420024	0.506817	0.44431	0.476617		0.322892	0.316731	0.324518	0.270916	0.291404	0.2639		0.63733	0.668104	0.6287	0.67004	0.692806	0.669442	0.667115	0.277429	0.398148	0.339451	0.4388	0.270361
257.148	0.445731	0.489634	0.50348	0.37489	0.413211	0.477709	0.858609	0.851446	0.750085	0.887897	0.927882	0.80888	0.433254	0.39834	0.531145	0.35543	0.432296		0.322317	0.380931	0.391141	0.310236	0.182944	0.298877		0.666222	0.64701	0.610594	0.667112	0.710025	0.67169	0.678971	0.366931	0.399511	0.315227	0.435043	0.291641
259.14	0.476917	0.466519	0.468973	0.467023	0.375388	0.491152	0.855847	0.895079	0.781854	0.918144	0.90916	0.79741	0.488804	0.434427	0.538874	0.391648	0.322588		0.430291	0.385512	0.375071	0.306268	0.3155	0.339202		0.665537	0.620413	0.647346	0.684087	0.716799	0.666149	0.688364	0.358832	0.389233	0.293716	0.464128	0.3303
261.143	0.460052	0.526657	0.528648	0.461011	0.425575	0.488097	0.857421	0.889872	0.762986	0.916161	0.877718	0.786818	0.532183	0.378791	0.583187	0.315667	0.367706		0.379636	0.433203	0.376204	0.293256	0.280691	0.324491		0.680162	0.656397	0.677122	0.652439	0.690585	0.70347	0.683003	0.398206	0.324349	0.266529	0.327183	0.325138
263.146	0.418718	0.535048	0.475719	0.401456	0.471807	0.462058	0.8389	0.868651	0.767712	0.878092	0.940177	0.874563	0.470671	0.386268	0.559566	0.369953	0.531456		0.365472	0.414418	0.370769	0.322165	0.309113	0.303634		0.664607	0.691052	0.66184	0.665584	0.714641	0.691396	0.730295	0.392484	0.37418	0.267417	0.361967	0.402136
265.149	0.44295	0.531806	0.502484	0.462672	0.490963	0.523727	0.892007	0.844549	0.781497	0.940571	0.969651	0.875428	0.475332	0.329789	0.549295	0.402629	0.456157		0.447433	0.373489	0.354309	0.367713	0.314808	0.203315		0.639595	0.686939	0.665966	0.700223	0.718703	0.693584	0.68341	0.357029	0.375213	0.267221	0.421279	0.259172
267.141	0.4864	0.516791	0.487061	0.468756	0.452684	0.516151	0.901785	0.895597	0.803087	0.930148	0.955282	0.828194	0.496273	0.394574	0.6157	0.384518	0.424131		0.460832	0.355959	0.441023	0.366488	0.324133	0.344114		0.703148	0.664663	0.642219	0.67124	0.690804	0.735847	0.672052	0.384313	0.396275	0.326036	0.427115	0.36298
269.144	0.516517	0.445113	0.471182	0.462815	0.420397	0.494717	0.882955	0.882055	0.788527	0.910765	0.903359	0.821859	0.48795	0.415067	0.613108	0.413678	0.40725		0.434952	0.351334	0.340384	0.328156	0.298605	0.310638		0.66332	0.670686	0.641668	0.67833	0.70911	0.723218	0.664095	0.396792	0.35219	0.371618	0.381997	0.387592
271.147	0.502629	0.508354	0.524346	0.360958	0.424903	0.466253	0.863948	0.867953	0.78566	0.91507	0.881161	0.792974	0.471707	0.428418	0.549608	0.386724	0.468695		0.446469	0.321346	0.357877	0.286812	0.267618	0.329273		0.644528	0.675566	0.645894	0.641354	0.704989	0.72008	0.664807	0.352393	0.387717	0.292394	0.389176	0.381731
273.151	0.569585	0.489206	0.51844	0.470264	0.450323	0.500985	0.86923	0.870231	0.771583	0.887849	0.910659	0.782183	0.493621	0.443094	0.538462	0.415592	0.396547		0.451549	0.376161	0.375412	0.284608	0.293923	0.258542		0.69151	0.716198	0.648548	0.671738	0.71347	0.737832	0.694762	0.29533	0.466269	0.232489	0.403686	0.301207
275.154	0.504785	0.509474	0.492598	0.482395	0.438316	0.53647	0.875085	0.893393	0.785519	0.881832	0.87108	0.823245	0.515006	0.414665	0.559847	0.399376	0.392471		0.423759	0.394091	0.387888	0.358965	0.375194	0.30295		0.661265	0.698452	0.669283	0.695109	0.70566	0.73353	0.720386	0.407212	0.362908	0.259706	0.418704	0.358061
277.145	0.476211	0.457176	0.527939	0.492702	0.479301	0.540482	0.907439	0.918855	0.772824	0.923615	0.902124	0.870504	0.564296	0.479412	0.543373	0.399823	0.304192		0.415538	0.326948	0.342427	0.334705	0.221839	0.296137		0.658306	0.688257	0.645711	0.682769	0.68674	0.736391	0.642765	0.305903	0.277534	0.270158	0.492264	0.322215
279.149	0.475961	0.559773	0.510648	0.399693	0.483076	0.482136	0.881361	0.936429	0.74732	0.921585	0.913608	0.869471	0.471675	0.435852	0.563814	0.400349	0.524247		0.503586	0.334994	0.373644	0.29552	0.220929	0.250612		0.685527	0.700647	0.624561	0.693592	0.710292	0.760766	0.683439	0.34339	0.376226	0.241708	0.489578	0.250906
281.152	0.502951	0.549646	0.537046	0.460934	0.464795	0.532641	0.899573	0.902041	0.780944	0.899382	0.928719	0.863889	0.447616	0.437878	0.572723	0.423733	0.43884		0.359084	0.384908	0.374261	0.308981	0.274319	0.343445		0.650085	0.693692	0.648975	0.733083	0.700947	0.724092	0.683219	0.413236	0.298979	0.323202	0.439832	0.359374
283.156	0.506714	0.458973	0.564971	0.44588	0.503241	0.504964	0.868997	0.92402	0.755758	0.932945	0.925032	0.859312	0.501767	0.455917	0.544665	0.451261	0.336572		0.473195	0.445509	0.405327	0.329225	0.291592	0.321249		0.695842	0.698668	0.664903	0.70794	0.69354	0.760041	0.653582	0.361229	0.417298	0.362345	0.396693	0.378246
285.16	0.534642	0.44492	0.504307	0.49142	0.464276	0.555735	0.864229	0.895237	0.791269	0.922635	0.892689	0.837769	0.464102	0.41573	0.548449	0.401298	0.412116		0.464606	0.382985	0.307436	0.344023	0.220619	0.308078		0.657845	0.705216	0.659791	0.684313	0.714855	0.693224	0.736775	0.394359	0.340836	0.266089	0.32696	0.336619
287.151	0.490011	0.469007	0.514766	0.429541	0.541596	0.524328	0.868213	0.888813	0.762358	0.934039	0.857293	0.863453	0.493555	0.379859	0.545221	0.414295	0.411104		0.428339	0.39918	0.395093	0.354196	0.235615	0.354061		0.716992	0.714203	0.657857	0.693641	0.725406	0.723285	0.716422	0.359212	0.404001	0.305256	0.430046	0.30132
289.154	0.438183	0.45801	0.488536	0.423165	0.454071	0.538354	0.866151	0.896777	0.794175	0.914638	0.882983	0.854636	0.504598	0.375874	0.575097	0.415213	0.49592		0.448323	0.437269	0.396996	0.307445	0.190059	0.308053		0.701688	0.736038	0.611492	0.72287	0.68525	0.694767	0.661299	0.457049	0.346685	0.325409	0.362868	0.391285
291.157	0.457388	0.470724	0.489649	0.525222	0.527279	0.471794	0.876324	0.919258	0.763895	0.917189	0.869992	0.834879	0.57177	0.373042	0.560675	0.530057	0.540808		0.396986	0.352967	0.375662	0.340683	0.248174	0.426798		0.679327	0.732323	0.672271	0.72357	0.727457	0.727882	0.68622	0.354224	0.255667	0.316015	0.436053	0.418923
293.161	0.444298	0.466978	0.4764	0.493515	0.486928	0.552452	0.862093	0.86498	0.789498	0.898857	0.880437	0.833712	0.53102	0.425455	0.577056	0.461154	0.425243		0.488442	0.356807	0.351883	0.354263	0.229888	0.32263		0.681155	0.710746	0.644514	0.682356	0.745924	0.729741	0.689711	0.337859	0.390299	0.389466	0.476325	0.251039
295.164	0.46602	0.554707	0.483418	0.45779	0.434588	0.487289	0.866324	0.893219	0.768858	0.957925	0.958811	0.862918	0.536076	0.402424	0.597942	0.40585	0.47915		0.437391	0.377606	0.343481	0.352364	0.337812	0.380137		0.691768	0.71568	0.648705	0.689866	0.716812	0.717651	0.722544	0.423978	0.470861	0.312822	0.422627	0.345615
297.155	0.477312	0.403001	0.528638	0.532072	0.555758	0.497694	0.898495	0.920376	0.78012	0.913344	0.920242	0.850638	0.506505	0.439086	0.57024	0.324275	0.457124		0.479622	0.390174	0.40028	0.331845	0.241819	0.329178		0.696835	0.70357	0.662819	0.715188	0.684721	0.777532	0.678611	0.389099	0.404918	0.328874	0.476494	0.28771
299.159	0.460259	0.461977	0.500598	0.463967	0.445749	0.618758	0.915898	0.904299	0.763429	0.874503	0.915014	0.843632	0.47459	0.375613	0.578716	0.422313	0.457284		0.461073	0.371035	0.418609	0.377708	0.307302	0.332103		0.70016	0.712618	0.616797	0.72718	0.738356	0.73376	0.727882	0.37178	0.346606	0.323665	0.423878	0.303728
301.162	0.50727	0.463609	0.571896	0.498056	0.481887	0.460766	0.925095	0.906595	0.79483	0.872406	0.918741	0.86227	0.506534	0.472937	0.526856	0.374503	0.472092		0.444198	0.389734	0.319071	0.376755	0.26258	0.305383		0.70369	0.727143	0.669518	0.716822	0.745507	0.774943	0.682955	0.412989	0.359427	0.311855	0.509991	0.276536
303.165	0.51242	0.575561	0.522921	0.437153	0.549509	0.577768	0.919757	0.877208	0.770215	0.934478	0.879789	0.822301	0.467034	0.498856	0.640444	0.342972	0.472975		0.476364	0.346473	0.321286	0.298652	0.276676	0.372104		0.678864	0.708935	0.634492	0.724761	0.703383	0.735415	0.696667	0.42834	0.432404	0.436541	0.369154	0.321077
305.156	0.421914	0.486149	0.538176	0.369546	0.516093	0.517501	0.942478	0.895111	0.792023	0.868832	0.931544	0.829958	0.530562	0.432105	0.534795	0.482345	0.380599		0.496503	0.373739	0.305535	0.266673	0.304322	0.342515		0.680151	0.731639	0.669536	0.729806	0.710982	0.752523	0.690469	0.389963	0.362363	0.345373	0.44555	0.352934
307.16	0.429993	0.488302	0.535822	0.497443	0.484795	0.480205	0.883603	0.886061	0.791011	0.905969	0.890038	0.822909	0.562609	0.491995	0.591635	0.416715	0.450815		0.423212	0.447553	0.35071	0.356391	0.253119	0.331894		0.715055	0.723233	0.648089	0.715789	0.74242	0.794735	0.685899	0.373856	0.385909	0.373332	0.393683	0.350247
309.163	0.447522	0.464229	0.55414	0.487716	0.566775	0.546949	0.934391	0.912035	0.787893	0.928203	0.951505	0.836765	0.567787	0.335884	0.603263	0.436521	0.452938		0.5042	0.408133	0.352459	0.439267	0.346384	0.323775		0.70102	0.706114	0.679379	0.702399	0.699949	0.77244	0.704257	0.40289	0.412163	0.329444	0.486819	0.379558
311.166	0.441921	0.510373	0.493208	0.438265	0.519688	0.537929	0.869612	0.894066	0.785679	0.839047	0.938593	0.801613	0.501073	0.414371	0.607271	0.454337	0.498426		0.43169	0.445396	0.365159	0.379864	0.270161	0.338579		0.712169	0.723959	0.683595	0.676224	0.744686	0.740311	0.680966	0.371327	0.451063	0.354005	0.450297	0.36988
313.17	0.487843	0.520525	0.563902	0.386064	0.472722	0.590349	0.882889	0.908464	0.774496	0.897294	0.938191	0.795115	0.524885	0.398705	0.615499	0.474836	0.520542		0.469169	0.46046	0.340077	0.34987	0.310511	0.368786		0.71052	0.70212	0.645987	0.676723	0.769148	0.759737	0.636971	0.421943	0.379624	0.299086	0.406522	0.372754
315.161	0.505551	0.51346	0.560296	0.436709	0.498188	0.622536	0.918822	0.937309	0.761413	0.872212	0.955067	0.816716	0.596856	0.393667	0.657617	0.458101	0.491546		0.404338	0.467682	0.428523	0.42077	0.275163	0.311169		0.697578	0.711561	0.680566	0.738003	0.698297	0.725902	0.686469	0.397195	0.307386	0.322946	0.40151	0.356569
317.164	0.514443	0.484412	0.510314	0.456277	0.523137	0.571312	0.896288	0.918158	0.796596	0.928747	0.937877	0.816964	0.549353	0.4987	0.525891	0.442784	0.475969		0.417816	0.473247	0.328986	0.361016	0.314525	0.316853		0.739153	0.727208	0.624854	0.710561	0.734262	0.760663	0.667509	0.397526	0.337783	0.318802	0.490202	0.351482
319.169	0.482421	0.443101	0.516482	0.419083	0.447514	0.520413	0.911057	0.897337	0.79239	0.910622	0.902403	0.791361	0.577785	0.41574	0.571092	0.471387	0.486771		0.384364	0.41721	0.31526	0.327433	0.252739	0.320262		0.679215	0.712788	0.647595	0.723457	0.764539	0.787914	0.683934	0.428061	0.315696	0.331763	0.458155	0.384902
321.172	0.436325	0.473777	0.514705	0.458694	0.576867	0.541614	0.931932	0.908323	0.781688	0.929228	0.858798	0.84466	0.566618	0.447692	0.565817	0.445188	0.418898		0.458384	0.413096	0.395342	0.30709	0.210948	0.431243		0.690647	0.714309	0.686567	0.688934	0.739256	0.734155	0.68285	0.456999	0.416262	0.301184	0.496177	0.416607
323.175	0.506657	0.561234	0.577027	0.52331	0.461529	0.5318	0.901482	0.89795	0.793919	0.846854	0.956293	0.852296	0.544476	0.455198	0.587907	0.420767	0.489721		0.441421	0.447145	0.407199	0.28772	0.211754	0.35161		0.70116	0.730219	0.672643	0.726679	0.722635	0.776366	0.711102	0.441481	0.396955	0.29159	0.469919	0.381442
325.179	0.475873	0.553847	0.495752	0.434113	0.461805	0.54776	0.880447	0.933441	0.805586	0.960686	0.881072	0.861609	0.519089	0.419657	0.557507	0.468736	0.50447		0.385094	0.387632	0.437526	0.391664	0.291905	0.343017		0.697581	0.745094	0.66486	0.706325	0.746997	0.781683	0.687203	0.415083	0.402499	0.363534	0.371132	0.363645
327.17	0.439846	0.409977	0.540832	0.427547	0.540167	0.560238	0.90941	0.900181	0.804397	0.932285	0.910087	0.808861	0.490681	0.430994	0.52411	0.400868	0.478966		0.453247	0.361981	0.383877	0.351824	0.213356	0.309614		0.720592	0.734523	0.661472	0.717799	0.69091	0.742111	0.748539	0.439162	0.38491	0.394219	0.441905	0.453967
329.173	0.42333	0.412251	0.502828	0.445415	0.476034	0.559981	0.916269	0.936414	0.784123	0.966686	0.863066	0.882243	0.528886	0.428488	0.575592	0.426235	0.343563		0.426497	0.453338	0.397901	0.365193	0.294559	0.296954		0.721566	0.682699	0.675929	0.695989	0.739157	0.747726	0.713008	0.421973	0.392544	0.361112	0.448552	0.379891
331.176	0.508555	0.492331	0.533531	0.524396	0.527135	0.514974	0.899962	0.906348	0.796588	0.914648	0.913726	0.837693	0.513524	0.425937	0.587837	0.442444	0.505742		0.414543	0.402179	0.421605	0.360123	0.256564	0.365022		0.733372	0.759029	0.688509	0.728204	0.745777	0.794334	0.695987	0.368668	0.305188	0.306453	0.369961	0.417272
333.18	0.490509	0.534099	0.537161	0.494374	0.489468	0.526929	0.832885	0.898609	0.770953	0.985475	0.911156	0.822214	0.574286	0.471641	0.592654	0.46607	0.488544		0.375444	0.389848	0.460463	0.409296	0.259325	0.421548		0.726055	0.755658	0.650859	0.746701	0.741808	0.753881	0.707356	0.343198	0.484822	0.339179	0.380639	0.441322
335.183	0.524443	0.503548	0.538638	0.567101	0.520658	0.657771	0.929483	0.86912	0.812499	0.958351	0.868146	0.851042	0.552156	0.444492	0.518886	0.427686	0.424356		0.310863	0.389051	0.412754	0.34102	0.313975	0.350033		0.729723	0.705982	0.64259	0.719633	0.723246	0.78047	0.711183	0.39722	0.450231	0.279746	0.417335	0.37974
337.174	0.523605	0.562929	0.556796	0.402577	0.501826	0.573494	0.862605	0.887604	0.801876	0.910236	0.879164	0.860676	0.551604	0.427678	0.599029	0.418415	0.477218		0.38797	0.399947	0.399911	0.326637	0.288282	0.374675		0.667336	0.715113	0.643915	0.687697	0.764898	0.760726	0.664693	0.393168	0.378911	0.297615	0.401494	0.372518
339.178	0.513551	0.506696	0.493671	0.503838	0.493439	0.483508	0.87749	0.941346	0.816954	0.889528	0.924883	0.875307	0.60807	0.419034	0.658042	0.424771	0.502885		0.456058	0.425515	0.442408	0.353714	0.280461	0.362677		0.716171	0.729324	0.662094	0.707739	0.754984	0.801131	0.681658	0.414605	0.396929	0.304642	0.449808	0.313329
341.181	0.437085	0.518841	0.488616	0.503402	0.526445	0.52377	0.931015	0.847493	0.788095	0.931083	0.965401	0.848871	0.526682	0.362248	0.608232	0.421168	0.463678		0.435703	0.376842	0.429296	0.317871	0.303201	0.33253		0.718311	0.749334	0.669608	0.732326	0.728538	0.808339	0.741476	0.443891	0.445517	0.298641	0.481069	0.415505
343.184	0.461282	0.45556	0.502411	0.534192	0.464318	0.559306	0.883351	0.889577	0.813701	0.956206	0.914591	0.866366	0.552705	0.427588	0.571486	0.444506	0.509597		0.363064	0.443227	0.382514	0.402755	0.33171	0.323755		0.705653	0.755579	0.642686	0.675926	0.720042	0.771775	0.729152	0.367963	0.398267	0.383595	0.452047	0.368667
345.187	0.501623	0.541382	0.437784	0.549723	0.479477	0.48819	0.868976	0.91004	0.824941	0.92935	0.914673	0.834324	0.560512	0.41238	0.593162	0.418392	0.522131		0.3514	0.440357	0.461088	0.405037	0.307105	0.35994		0.729035	0.72232	0.673655	0.709179	0.702367	0.780422	0.684356	0.360574	0.48134	0.27491	0.505861	0.446587
347.179	0.554113	0.463112	0.544346	0.529411	0.503857	0.551161	0.869869	0.903222	0.797818	0.935168	0.844902	0.880856	0.5793	0.367567	0.586427	0.553306	0.488777		0.345385	0.39742	0.447775	0.38076	0.268382	0.326111		0.741254	0.713733	0.682641	0.746926	0.712886	0.79886	0.681728	0.379299	0.369441	0.307094	0.540053	0.327507
349.182	0.520711	0.54702	0.450247	0.503	0.506173	0.584857	0.896654	0.89681	0.782884	0.929922	0.907025	0.82277	0.494362	0.448045	0.57651	0.542574	0.535215		0.409102	0.424836	0.44437	0.35972	0.310598	0.33734		0.711759	0.738448	0.66481	0.718888	0.750416	0.812391	0.749086	0.498426	0.380281	0.354411	0.475285	0.37394
351.187	0.551957	0.554667	0.503266	0.474151	0.56423	0.567545	0.891709	0.896157	0.771097	0.955023	0.885143	0.862183	0.549411	0.494461	0.653245	0.416924	0.543891		0.491372	0.389728	0.385724	0.340299	0.282568	0.34395		0.730889	0.745943	0.662016	0.709203	0.739378	0.786138	0.730665	0.399415	0.442263	0.282702	0.569549	0.41652
353.19	0.5037	0.51781	0.491776	0.462187	0.549457	0.593937	0.885828	0.906404	0.807814	0.967129	0.864482	0.869634	0.522788	0.45563	0.649671	0.49001	0.458247		0.39648	0.408104	0.371657	0.339292	0.286396	0.314511		0.768207	0.698615	0.664893	0.734942	0.756236	0.727291	0.745349	0.455298	0.3954	0.299964	0.50448	0.371113
355.193	0.520725	0.510497	0.544368	0.585863	0.458235	0.597801	0.90107	0.95565	0.787011	0.903135	0.910872	0.893101	0.544342	0.435593	0.616227	0.473805	0.486123		0.473476	0.466841	0.380446	0.397581	0.330019	0.320964		0.735409	0.732091	0.652545	0.71922	0.740698	0.773226	0.71855	0.351283	0.422158	0.398871	0.503645	0.348147
357.184	0.514102	0.619294	0.573245	0.555708	0.542531	0.512047	0.910421	0.960791	0.825068	0.963404	0.912302	0.865085	0.588101	0.47399	0.628061	0.421248	0.506747		0.417706	0.434608	0.365925	0.448356	0.319705	0.339298		0.74868	0.691261	0.693102	0.729994	0.748167	0.797814	0.738021	0.439119	0.46966	0.280066	0.425951	0.446841
359.188	0.508206	0.557818	0.523981	0.516096	0.511998	0.458858	0.909612	0.898925	0.800789	0.969319	0.881032	0.886066	0.581083	0.392354	0.632505	0.477751	0.503758		0.470369	0.436572	0.413769	0.346293	0.23418	0.370836		0.740249	0.735756	0.662811	0.717394	0.729887	0.76943	0.754726	0.412481	0.399178	0.350834	0.446858	0.344523
361.191	0.541621	0.489049	0.50409	0.530018	0.510403	0.493102	0.917629	0.932525	0.787555	0.900594	0.935511	0.886388	0.522824	0.483144	0.513397	0.432409	0.50968		0.442767	0.47528	0.431021	0.388731	0.225742	0.386069		0.750027	0.715151	0.643972	0.721982	0.783655	0.788068	0.745362	0.407806	0.433394	0.386458	0.459019	0.423222
363.194	0.518217	0.483698	0.56963	0.466543	0.567099	0.505142	0.912534	0.921143	0.79162	0.894509	0.897881	0.927162	0.522672	0.343244	0.586635	0.397535	0.503873		0.465072	0.502093	0.373397	0.346658	0.31526	0.300947		0.737697	0.6886	0.672398	0.719216	0.738609	0.803853	0.708595	0.405562	0.422206	0.347367	0.498678	0.376852
365.197	0.512736	0.588146	0.592717	0.471961	0.564666	0.493	0.890579	0.899658	0.798101	0.972208	0.878681	0.912134	0.509586	0.427779	0.578678	0.419046	0.429307		0.439611	0.45918	0.413701	0.390744	0.273869	0.335332		0.744953	0.735312	0.666195	0.728295	0.707734	0.798521	0.72499	0.435281	0.388797	0.285366	0.567637	0.430744
367.189	0.535741	0.494995	0.574011	0.502574	0.505741	0.49497	0.852309	0.844786	0.807176	0.942667	0.872801	0.913868	0.537211	0.445606	0.574402	0.466392	0.535816		0.41186	0.409451	0.334591	0.411507	0.263399	0.428913		0.723171	0.725152	0.658283	0.732454	0.728049	0.814343	0.737851	0.384135	0.477101	0.337037	0.523247	0.397255
369.192	0.534888	0.539653	0.562827	0.480645	0.439492	0.528792	0.854775	0.932069	0.812413	0.961595	0.922811	0.895198	0.535825	0.513323	0.642494	0.397348	0.477089		0.438607	0.439209	0.358951	0.427281	0.36606	0.376576		0.748885	0.781723	0.637406	0.731407	0.717873	0.794551	0.745381	0.458366	0.430447	0.36215	0.378398	0.42358
371.195	0.532255	0.600514	0.565373	0.530091	0.507176	0.585852	0.919145	0.905659	0.808721	0.937739	0.99819	0.92032	0.577529	0.459822	0.62234	0.422566	0.419853		0.441589	0.444027	0.419158	0.383367	0.400507	0.407202		0.727649	0.752662	0.662812	0.769196	0.70117	0.770267	0.760343	0.442623	0.504802	0.323188	0.490414	0.477374
373.199	0.511953	0.496558	0.607617	0.639191	0.550021	0.523109	0.92713	0.921754	0.813432	0.925331	0.916658	0.883489	0.553692	0.454093	0.609142	0.528314	0.558713		0.373302	0.46548	0.437939	0.389336	0.394186	0.308277		0.727167	0.752098	0.660536	0.71899	0.769675	0.753511	0.743009	0.442607	0.478837	0.418287	0.422906	0.423013
375.202	0.513719	0.548805	0.585492	0.612516	0.434927	0.572572	0.868719	0.917478	0.820301	0.961517	0.980189	0.864362	0.580255	0.432565	0.642292	0.471064	0.528352		0.425208	0.416487	0.372049	0.389084	0.37031	0.333236		0.756526	0.752432	0.657093	0.720673	0.740533	0.815736	0.749905	0.466054	0.408806	0.356306	0.450226	0.473062
377.193	0.472109	0.549036	0.619229	0.481918	0.476813	0.48409	0.90198	0.909124	0.841027	0.930732	0.939352	0.893278	0.593155	0.493438	0.654381	0.471332	0.49985		0.362207	0.471133	0.401056	0.414539	0.333882	0.391865		0.722132	0.726665	0.671511	0.745468	0.764742	0.816849	0.707797	0.471194	0.421073	0.316787	0.460997	0.461195
379.197	0.530772	0.502646	0.497096	0.557378	0.488123	0.540661	0.878081	0.873387	0.827604	0.977473	0.958102	0.899332	0.570698	0.476056	0.594655	0.474452	0.505002		0.443821	0.446074	0.455865	0.366383	0.286428	0.316119		0.746881	0.740098	0.638961	0.732486	0.680861	0.771945	0.731767	0.472345	0.443619	0.382493	0.507117	0.39727
381.2	0.483504	0.612008	0.593621	0.492893	0.525276	0.49445	0.896834	0.943444	0.823335	0.91986	0.91503	0.895737	0.626174	0.442639	0.603747	0.496545	0.468704		0.371265	0.421119	0.36395	0.40412	0.372323	0.376715		0.757568	0.729728	0.676581	0.76275	0.712871	0.805504	0.749363	0.476486	0.400073	0.387732	0.46721	0.444237
383.203	0.454044	0.549054	0.622355	0.435665	0.567321	0.558007	0.90623	0.90593	0.811936	0.927672	0.887906	0.915793	0.605277	0.372002	0.614184	0.418866	0.369534		0.451147	0.394318	0.404295	0.379144	0.388541	0.263213		0.752239	0.739164	0.656165	0.731279	0.723773	0.845139	0.767738	0.469523	0.414426	0.347597	0.471222	0.466371
385.208	0.568086	0.560752	0.613211	0.511802	0.570837	0.451324	0.904389	0.905781	0.825484	0.904223	0.94597	0.901675	0.590032	0.4342	0.632447	0.469529	0.538042		0.482715	0.433265	0.427336	0.441421	0.312184	0.361435		0.732563	0.739988	0.638582	0.777476	0.70349	0.805442	0.77862	0.484345	0.340862	0.41309	0.536022	0.377752
387.211	0.499114	0.511689	0.589291	0.508237	0.454682	0.54416	0.924016	0.919835	0.787177	0.954113	0.953388	0.886784	0.572588	0.426652	0.585287	0.460565	0.498629		0.384853	0.454784	0.40199	0.369864	0.402586	0.328153		0.725613	0.741063	0.648279	0.783086	0.690295	0.788707	0.762843	0.489933	0.474925	0.286841	0.511565	0.383432
389.202	0.530488	0.569702	0.557848	0.499912	0.518667	0.547101	0.88683	0.901464	0.801361	0.961516	0.91107	0.899787	0.561061	0.446158	0.525567	0.50682	0.418537		0.52491	0.439749	0.433984	0.465426	0.31618	0.315939		0.729248	0.757408	0.680445	0.798856	0.769556	0.802387	0.728584	0.488294	0.476466	0.372766	0.464047	0.466365
391.205	0.537356	0.500685	0.657583	0.478575	0.572937	0.527087	0.886823	0.899118	0.813288	0.921669	0.940572	0.911644	0.632913	0.530088	0.614283	0.472512	0.445226		0.42714	0.400558	0.403929	0.407674	0.374675	0.350701		0.745223	0.751246	0.677699	0.769476	0.7276	0.781841	0.747697	0.413959	0.426947	0.358598	0.480747	0.502932
393.209	0.581697	0.577608	0.680126	0.595602	0.541617	0.588396	0.908154	0.875092	0.795337	0.927404	0.914031	0.919212	0.573011	0.468793	0.602117	0.489154	0.484973		0.450648	0.407024	0.362477	0.396215	0.366325	0.509124		0.712642	0.73291	0.662665	0.762348	0.733444	0.807186	0.70803	0.444328	0.464149	0.430814	0.461693	0.448334
395.212	0.564091	0.592298	0.612801	0.566064	0.544352	0.52424	0.869081	0.905224	0.846345	0.927156	0.924421	0.911209	0.531995	0.447281	0.641162	0.391331	0.429273		0.410769	0.414108	0.444506	0.383973	0.284845	0.317758		0.700103	0.710511	0.651204	0.751049	0.750382	0.788819	0.713847	0.480557	0.441633	0.347341	0.521298	0.440668
397.203	0.4882	0.612664	0.525913	0.577488	0.498009	0.524249	0.862555	0.880514	0.80805	0.930654	0.986901	0.891676	0.574699	0.390059	0.631703	0.476456	0.498498		0.425453	0.471538	0.411567	0.44036	0.299682	0.3395		0.754087	0.753414	0.64837	0.755424	0.771109	0.816429	0.705476	0.420129	0.387098	0.425972	0.473941	0.461294
399.207	0.541567	0.535695	0.530891	0.570898	0.516818	0.477451	0.888374	0.889211	0.82777	0.976827	0.947635	0.921697	0.581131	0.447656	0.660939	0.4708	0.559847		0.4444	0.392452	0.384171	0.375848	0.320705	0.362201		0.742653	0.738656	0.665903	0.75527	0.756684	0.799465	0.739917	0.484568	0.493895	0.361261	0.565778	0.339764
401.21	0.623757	0.567238	0.554632	0.531824	0.487289	0.527394	0.948352	0.899388	0.821627	0.955048	0.926657	0.92175	0.577101	0.432656	0.620459	0.480753	0.580429		0.413644	0.425302	0.403595	0.395543	0.34038	0.401627		0.725417	0.750531	0.683804	0.773508	0.758387	0.843473	0.760795	0.485716	0.403064	0.356796	0.460431	0.463533
403.213	0.566663	0.52187	0.677704	0.588133	0.616167	0.550184	0.907296	0.904459	0.79165	0.984484	0.94333	0.866622	0.585428	0.49366	0.564921	0.423007	0.554343		0.51573	0.400615	0.405555	0.373484	0.372138	0.392896		0.755866	0.702817	0.674013	0.74935	0.810059	0.834015	0.720784	0.466763	0.462868	0.293952	0.477278	0.460991
405.204	0.46905	0.487924	0.591994	0.510438	0.5605	0.582173	0.899021	0.90948	0.828216	0.991993	0.954945	0.956041	0.669296	0.458294	0.550682	0.482192	0.662754		0.432333	0.396066	0.379893	0.401186	0.376324	0.42531		0.737515	0.742595	0.702779	0.756808	0.740588	0.756318	0.732122	0.440286	0.34816	0.406291	0.502509	0.420354
407.208	0.500836	0.518142	0.636526	0.62473	0.541113	0.530339	0.876371	0.890895	0.82706	0.9917	0.956338	0.884392	0.64512	0.428521	0.636377	0.481921	0.540081		0.448994	0.434725	0.421797	0.397568	0.316801	0.371372		0.762309	0.749974	0.721079	0.773181	0.760301	0.798022	0.740858	0.454098	0.417182	0.329332	0.462012	0.374738
409.211	0.528464	0.544447	0.609277	0.628781	0.53695	0.541175	0.877637	0.899515	0.832828	0.913679	1.04403	0.888234	0.592785	0.420363	0.644429	0.476831	0.567052		0.460862	0.426347	0.440334	0.390207	0.281646	0.340153		0.762648	0.779599	0.696748	0.77084	0.784265	0.753199	0.744218	0.525605	0.400035	0.328274	0.511213	0.381326
411.214	0.514178	0.552227	0.571691	0.464897	0.611765	0.483183	0.895793	0.91049	0.811009	1.00975	0.96699	0.89859	0.650597	0.47315	0.619036	0.401989	0.47319		0.447411	0.466634	0.477232	0.371414	0.356476	0.351101		0.744387	0.787557	0.703781	0.784736	0.76943	0.774787	0.740592	0.549545	0.362435	0.353731	0.475513	0.46577
413.218	0.592442	0.546799	0.591618	0.526345	0.584098	0.612318	0.916855	0.896889	0.820404	0.988347	0.928621	0.911794	0.568301	0.469202	0.641193	0.438015	0.603162		0.398545	0.431192	0.424099	0.381775	0.312154	0.395841		0.719014	0.763674	0.71694	0.744923	0.746676	0.775685	0.7695	0.440304	0.457859	0.344718	0.514651	0.443564
415.209	0.508631	0.592928	0.65698	0.582549	0.59776	0.660102	0.944379	0.893627	0.812724	0.954272	0.980887	0.936316	0.662501	0.458581	0.67023	0.455153	0.551312		0.453472	0.458615	0.433679	0.416186	0.414156	0.348347		0.799571	0.768854	0.693989	0.773236	0.751405	0.772829	0.724669	0.516855	0.396373	0.320767	0.553762	0.338288
417.212	0.519306	0.55245	0.619205	0.467563	0.620309	0.596208	0.889791	0.903387	0.840034	1.00519	0.88749	0.948558	0.562081	0.510187	0.700746	0.492563	0.560923		0.521259	0.463669	0.45643	0.397935	0.369247	0.402758		0.765899	0.764274	0.709993	0.775065	0.728664	0.7492	0.757392	0.483177	0.439393	0.305567	0.521247	0.460392
419.216	0.496656	0.560391	0.603871	0.580403	0.605562	0.627063	0.887623	0.957803	0.820992	0.882828	0.994693	0.946319	0.534756	0.483911	0.643768	0.54748	0.57733		0.504034	0.504408	0.425807	0.450735	0.260057	0.445507		0.771428	0.779317	0.709858	0.784438	0.769281	0.846635	0.756632	0.446286	0.436846	0.310243	0.538325	0.464866
421.22	0.557201	0.561642	0.565107	0.465054	0.5044	0.520921	0.895905	0.874877	0.83436	0.929346	1.0169	0.922016	0.581862	0.457213	0.629359	0.587697	0.510224		0.444892	0.473336	0.42827	0.402224	0.324519	0.407866		0.740174	0.771982	0.708476	0.774654	0.759137	0.813262	0.720358	0.505358	0.40953	0.301198	0.573907	0.444542
423.223	0.535979	0.620528	0.559969	0.525625	0.589426	0.551415	0.904827	0.897171	0.81061	0.873311	0.926804	0.904296	0.599253	0.48729	0.732088	0.537378	0.529535		0.433582	0.473842	0.37277	0.388735	0.344671	0.413005		0.740804	0.745739	0.704649	0.79174	0.731271	0.797087	0.721381	0.466164	0.40514	0.368781	0.495952	0.380035
425.214	0.504091	0.621418	0.552887	0.561744	0.551967	0.56918	0.898163	0.920149	0.81874	0.910239	0.985975	0.93395	0.57636	0.478735	0.688662	0.566772	0.458222		0.439664	0.462464	0.417696	0.41371	0.352554	0.391689		0.746109	0.763628	0.701684	0.790511	0.743218	0.798454	0.74154	0.46407	0.389425	0.387669	0.490129	0.38474
427.218	0.56463	0.607636	0.630674	0.493658	0.640777	0.590827	0.952026	0.944805	0.834444	0.929244	0.992857	0.87782	0.638788	0.466979	0.644225	0.489525	0.595		0.429985	0.475511	0.490578	0.381589	0.340489	0.36586		0.781264	0.784354	0.681277	0.724272	0.77352	0.789377	0.756766	0.501735	0.46371	0.429607	0.433474	0.427999
429.221	0.527046	0.66138	0.627807	0.503735	0.567039	0.590897	0.926253	0.891674	0.833704	0.971581	0.961762	0.929473	0.576729	0.430779	0.638938	0.552078	0.464101		0.403021	0.462637	0.425621	0.343044	0.188316	0.348446		0.78234	0.788559	0.67518	0.738275	0.716025	0.833571	0.788287	0.511312	0.451186	0.391678	0.518413	0.374321
431.224	0.529896	0.6109	0.551566	0.634293	0.539988	0.584641	0.921032	0.937679	0.856569	0.933928	0.954592	0.902964	0.591174	0.540636	0.62105	0.381616	0.555427		0.439956	0.468854	0.460191	0.442584	0.274513	0.315024		0.775307	0.77597	0.697617	0.781084	0.734614	0.77336	0.73062	0.484829	0.449713	0.365188	0.441154	0.403204
433.228	0.557556	0.558507	0.629548	0.612578	0.568165	0.61363	0.928939	0.930511	0.837138	0.915736	0.979802	0.918284	0.626875	0.48626	0.618681	0.569331	0.557721		0.434781	0.502048	0.410129	0.37399	0.352971	0.403829		0.76237	0.765651	0.700211	0.758029	0.758816	0.787259	0.764909	0.49367	0.458246	0.312829	0.523021	0.386072
435.219	0.468873	0.579639	0.635187	0.496378	0.584612	0.553618	0.940052	0.9112	0.850096	0.926293	0.978778	0.959778	0.620354	0.477878	0.585214	0.436393	0.452374		0.435627	0.529306	0.469148	0.358807	0.38101	0.392497		0.777195	0.782795	0.677546	0.792759	0.775305	0.777384	0.774652	0.482899	0.341398	0.364904	0.398867	0.448783
437.222	0.628522	0.636584	0.629838	0.442676	0.566965	0.622138	0.889982	0.876323	0.826223	0.985764	0.964205	0.927031	0.583739	0.433768	0.67718	0.442541	0.548304		0.419866	0.462301	0.460011	0.398751	0.38423	0.389325		0.761087	0.767725	0.719337	0.748945	0.792329	0.802419	0.747604	0.520782	0.469468	0.389978	0.552264	0.342108
439.226	0.519404	0.614438	0.53698	0.517306	0.607811	0.602858	0.937473	0.912902	0.861526	0.991332	0.918543	0.913826	0.607028	0.450987	0.639154	0.471028	0.516633		0.376259	0.444464	0.430074	0.339228	0.298606	0.429968		0.76746	0.767858	0.691052	0.78098	0.784676	0.773548	0.764491	0.555146	0.449323	0.425168	0.492348	0.422004
441.229	0.536344	0.578789	0.653061	0.581574	0.568575	0.618261	0.9308	0.869447	0.862636	0.957895	0.95182	0.935929	0.619027	0.511234	0.604788	0.516337	0.609686		0.377192	0.468951	0.433221	0.384821	0.369807	0.42114		0.80102	0.780639	0.708721	0.76385	0.767457	0.80686	0.745752	0.43467	0.420756	0.387649	0.529284	0.35922
443.232	0.643805	0.54099	0.565214	0.562929	0.555678	0.56668	0.941214	0.894779	0.814208	0.909288	0.982881	0.916563	0.56556	0.496548	0.615103	0.42041	0.502657		0.433402	0.453805	0.426751	0.439514	0.342996	0.465861		0.756339	0.741707	0.673382	0.765361	0.783556	0.818462	0.746022	0.432073	0.434982	0.395724	0.478021	0.354427
445.223	0.59997	0.544644	0.594538	0.678158	0.546606	0.635791	0.902664	0.911392	0.81437	0.998922	1.02266	0.882992	0.638631	0.484899	0.695142	0.531622	0.516356		0.485983	0.491607	0.417383	0.412604	0.412112	0.364695		0.778818	0.806727	0.693549	0.779099	0.774744	0.815365	0.735739	0.456458	0.4046	0.383569	0.57006	0.418764
447.227	0.560463	0.536376	0.550025	0.575833	0.601103	0.670575	0.88923	0.882636	0.812545	0.983587	0.946316	0.920021	0.594073	0.471743	0.594541	0.498916	0.572376		0.504634	0.366742	0.436433	0.437766	0.381806	0.374431		0.788577	0.765188	0.701833	0.759819	0.763571	0.806331	0.748013	0.497718	0.440432	0.363533	0.467152	0.422257
449.23	0.52282	0.53703	0.573084	0.467897	0.647529	0.638456	0.8975	0.890126	0.880674	0.98741	0.954663	0.899346	0.648565	0.431878	0.677982	0.516584	0.591337		0.454379	0.377499	0.406393	0.403407	0.35421	0.363512		0.785629	0.794206	0.713914	0.75661	0.783708	0.812415	0.766172	0.496397	0.44185	0.333689	0.503328	0.377407
451.233	0.624945	0.584202	0.658119	0.533277	0.552549	0.602898	0.922113	0.949413	0.848649	0.992707	1.00151	0.915068	0.66801	0.518678	0.665386	0.504394	0.560473		0.461204	0.415512	0.414306	0.423163	0.408945	0.422074		0.770962	0.75845	0.703218	0.76108	0.810392	0.789108	0.733939	0.479796	0.418536	0.392567	0.547018	0.378793
453.238	0.611711	0.60359	0.633639	0.44913	0.568298	0.575039	0.937494	0.873263	0.813333	0.961661	0.999468	0.932556	0.62896	0.438989	0.693795	0.511454	0.455789		0.427443	0.537034	0.475786	0.427162	0.311497	0.355744		0.793411	0.788964	0.687525	0.729571	0.785438	0.834164	0.739448	0.604569	0.418603	0.362704	0.506434	0.450319
455.228	0.557056	0.644	0.632512	0.475484	0.641707	0.578953	0.922497	0.916724	0.828985	0.929297	1.02414	0.889811	0.611623	0.439497	0.653555	0.43866	0.573322		0.370031	0.422661	0.507494	0.341413	0.350213	0.350792		0.800652	0.767524	0.675618	0.753025	0.759735	0.817603	0.776179	0.57756	0.364524	0.35536	0.355598	0.480621
457.232	0.575044	0.662838	0.547414	0.534204	0.597673	0.561791	0.925274	0.894726	0.849895	0.993609	0.967912	0.922785	0.556333	0.528412	0.623538	0.514476	0.529429		0.407792	0.402317	0.497821	0.433035	0.415428	0.355945		0.794749	0.751124	0.740748	0.744537	0.745307	0.800537	0.768603	0.456254	0.436364	0.458782	0.493624	0.355373
459.236	0.566649	0.566614	0.592693	0.604696	0.575456	0.677934	0.936633	0.875731	0.83791	0.941748	0.999932	0.908755	0.615166	0.473906	0.628802	0.463481	0.608481		0.42606	0.451188	0.492602	0.419327	0.352631	0.354536		0.763496	0.793974	0.751707	0.765557	0.770042	0.817218	0.755626	0.441655	0.52329	0.416316	0.524217	0.424288
461.239	0.563788	0.673178	0.590608	0.515919	0.647735	0.658292	0.884558	0.93912	0.850957	1.04434	1.00746	0.933376	0.594242	0.415386	0.675086	0.49832	0.572685		0.365119	0.423592	0.400995	0.395331	0.254741	0.368862		0.80325	0.778221	0.725872	0.751822	0.75077	0.803945	0.714351	0.465273	0.471383	0.434376	0.522319	0.411946
463.242	0.582899	0.536837	0.562173	0.526181	0.540937	0.580757	0.887957	0.894277	0.866936	1.00663	0.949446	0.910032	0.542189	0.495879	0.710987	0.463163	0.50665		0.404066	0.472673	0.445345	0.421193	0.37176	0.389224		0.799347	0.754388	0.698922	0.750608	0.751185	0.848841	0.734881	0.466772	0.461141	0.349797	0.424976	0.523288
465.246	0.642588	0.602356	0.634021	0.49553	0.591853	0.567151	0.877129	0.914924	0.813698	1.01255	0.93363	0.948739	0.613585	0.404038	0.739528	0.505994	0.489625		0.396307	0.466673	0.467135	0.43883	0.300176	0.393192		0.764965	0.770845	0.729809	0.749732	0.771741	0.830153	0.776937	0.489786	0.455034	0.436026	0.483166	0.373058
467.237	0.662769	0.513179	0.60454	0.562641	0.599722	0.588154	0.908018	0.933838	0.820145	0.927935	0.966861	0.939039	0.607735	0.528593	0.614905	0.523451	0.575118		0.402381	0.466512	0.439685	0.336317	0.341981	0.416378		0.811656	0.740534	0.730685	0.713747	0.78006	0.826858	0.739936	0.507337	0.393082	0.485865	0.549091	0.427422
469.24	0.520737	0.602369	0.61718	0.543939	0.555361	0.594183	0.918937	0.927881	0.84384	0.986863	0.995395	0.937406	0.590038	0.519112	0.640277	0.573953	0.532228		0.489673	0.500296	0.469671	0.402739	0.28422	0.449407		0.78734	0.749043	0.73455	0.755866	0.753765	0.820063	0.777809	0.497764	0.443768	0.374314	0.43293	0.565261
471.243	0.532274	0.575175	0.596942	0.500719	0.498589	0.573615	0.927235	0.954274	0.841895	0.951103	0.935989	0.945538	0.549331	0.540661	0.667897	0.552245	0.538966		0.38491	0.472835	0.438568	0.389436	0.31654	0.455442		0.784381	0.766174	0.718055	0.778887	0.77437	0.800266	0.764841	0.496683	0.411717	0.380965	0.482553	0.530085
473.247	0.544604	0.597581	0.67016	0.527502	0.564883	0.677231	0.918076	0.934908	0.861019	1.02793	0.959506	0.978689	0.561833	0.425427	0.649216	0.454719	0.479972		0.455991	0.353816	0.428517	0.466586	0.351615	0.352876		0.781318	0.775627	0.744851	0.776898	0.753493	0.848027	0.758812	0.482219	0.372673	0.353292	0.464895	0.436335
475.238	0.567389	0.570412	0.647067	0.594863	0.520555	0.551405	0.901975	0.881984	0.838911	0.974334	0.996698	0.925768	0.58106	0.470088	0.707585	0.555298	0.382013		0.505027	0.451978	0.417194	0.413777	0.379101	0.381354		0.807052	0.802546	0.727705	0.783748	0.766268	0.829584	0.77032	0.493519	0.344074	0.36108	0.577419	0.361661
477.242	0.554565	0.556846	0.543768	0.462388	0.555445	0.674543	0.934769	0.899526	0.836484	1.01927	0.972442	0.966277	0.608181	0.484982	0.63678	0.516329	0.577183		0.449707	0.416672	0.449167	0.426269	0.311883	0.399974		0.787218	0.757967	0.745942	0.767363	0.788908	0.856877	0.779063	0.509502	0.456328	0.385903	0.536894	0.509442
479.245	0.559682	0.572558	0.598351	0.566936	0.617015	0.6439	0.982987	0.959219	0.826632	0.981237	0.961148	0.926176	0.561889	0.455325	0.730153	0.533377	0.528042		0.387502	0.486368	0.476891	0.425654	0.294382	0.439696		0.775172	0.795416	0.764466	0.745603	0.796986	0.832262	0.775515	0.488639	0.477246	0.423302	0.54966	0.44524
481.248	0.525657	0.645486	0.60106	0.556118	0.646785	0.639581	0.897332	0.898489	0.841745	1.02066	0.947677	0.950839	0.545838	0.497824	0.668119	0.556396	0.511266		0.381687	0.480038	0.42908	0.344552	0.282869	0.454696		0.794811	0.743127	0.768371	0.793522	0.760621	0.822308	0.757293	0.52801	0.383712	0.373874	0.621758	0.434963
483.252	0.588799	0.628885	0.615112	0.620781	0.584249	0.608044	0.951928	0.939584	0.828605	0.907103	0.959715	0.926311	0.56812	0.523587	0.635521	0.518874	0.57912		0.283654	0.478055	0.49689	0.452898	0.320228	0.423182		0.795604	0.73821	0.738463	0.732233	0.799915	0.841194	0.793182	0.481065	0.491693	0.393593	0.527397	0.386986
485.243	0.549813	0.649431	0.68402	0.611368	0.55487	0.610056	0.941602	0.920943	0.85503	0.882629	0.988595	0.927464	0.604519	0.508403	0.583115	0.515341	0.559883		0.389869	0.456907	0.449447	0.428692	0.385136	0.377023		0.813118	0.812128	0.722277	0.780139	0.772194	0.822347	0.799124	0.500601	0.404647	0.362896	0.445577	0.356836
487.246	0.616833	0.557524	0.622543	0.541293	0.621148	0.585121	0.993269	0.924239	0.867418	0.939751	0.997468	0.94755	0.581684	0.465358	0.533254	0.525035	0.452992		0.382545	0.475553	0.455246	0.457518	0.389874	0.418459		0.793911	0.761213	0.726525	0.794295	0.779584	0.813904	0.743778	0.553529	0.501577	0.481409	0.562505	0.491188
489.25	0.567102	0.593198	0.488287	0.564663	0.58774	0.604966	0.953044	0.902973	0.872215	0.996458	0.957491	0.904636	0.559696	0.478896	0.703093	0.518694	0.549775		0.432888	0.415758	0.45368	0.412536	0.374157	0.412972		0.79003	0.804403	0.744846	0.770672	0.770732	0.830956	0.819844	0.447935	0.483924	0.385712	0.551794	0.381085
491.253	0.53389	0.577137	0.551505	0.572426	0.596394	0.615377	0.971186	0.905878	0.855659	0.942141	0.914516	0.94116	0.600426	0.563067	0.717118	0.507998	0.509783		0.460549	0.46008	0.428074	0.4673	0.411239	0.405504		0.771606	0.786291	0.738343	0.7806	0.7956	0.80428	0.809467	0.504475	0.460229	0.42594	0.4995	0.382856
493.256	0.533841	0.574619	0.532487	0.575348	0.553061	0.686056	0.92718	0.894052	0.827556	1.00735	1.02401	0.9815	0.608159	0.535186	0.695791	0.623137	0.523826		0.394539	0.446055	0.360903	0.49261	0.363892	0.446096		0.792365	0.754696	0.739201	0.785007	0.778497	0.822305	0.779718	0.471503	0.414694	0.371611	0.500703	0.429004
495.248	0.554459	0.607412	0.618119	0.593238	0.556948	0.669817	0.929746	0.916673	0.881157	0.983177	0.913082	0.952631	0.567384	0.518347	0.597285	0.476998	0.591282		0.336359	0.488308	0.464155	0.391296	0.327144	0.496042		0.813631	0.763222	0.747368	0.770087	0.758631	0.794045	0.754954	0.431753	0.44293	0.392415	0.479375	0.404867
497.251	0.605651	0.630165	0.651193	0.656771	0.63557	0.617559	0.979664	0.902927	0.857944	0.977707	0.978339	0.94626	0.536938	0.45334	0.621456	0.522622	0.492171		0.382661	0.422972	0.397337	0.415548	0.367076	0.375123		0.794636	0.784229	0.737953	0.796804	0.699237	0.787927	0.792761	0.615993	0.372245	0.449148	0.547724	0.332885
499.254	0.517346	0.575114	0.655369	0.596264	0.578023	0.63729	0.919124	0.952375	0.875879	1.02059	0.887351	0.956489	0.556304	0.506885	0.684309	0.602732	0.465272		0.403359	0.471747	0.415093	0.436548	0.373554	0.447541		0.794343	0.806098	0.749718	0.793737	0.784825	0.803168	0.771441	0.534267	0.497128	0.377489	0.500657	0.392487
501.257	0.652736	0.668573	0.619981	0.49275	0.555993	0.739515	0.966235	0.910042	0.87356	0.986625	0.93831	0.952777	0.553587	0.526304	0.687858	0.621121	0.584997		0.397596	0.386782	0.47283	0.423361	0.373164	0.453103		0.82215	0.747808	0.752927	0.806874	0.782745	0.813039	0.784731	0.499955	0.477399	0.378046	0.550866	0.450965
503.262	0.620254	0.602321	0.615062	0.560182	0.640765	0.612203	0.911068	0.922425	0.839841	1.0112	0.92668	0.950478	0.574031	0.515136	0.677936	0.505735	0.458867		0.523552	0.482746	0.500684	0.419059	0.412639	0.371877		0.788676	0.799476	0.71166	0.782719	0.824617	0.853307	0.785262	0.532304	0.490343	0.380936	0.478988	0.477033
505.252	0.757634	0.564086	0.63575	0.531972	0.632897	0.542153	0.92897	0.933982	0.870981	0.979469	0.901339	0.961783	0.634012	0.519309	0.654813	0.557371	0.485323		0.456381	0.457867	0.484292	0.487974	0.422325	0.411038		0.784343	0.771818	0.728569	0.767696	0.764202	0.853994	0.794176	0.53232	0.397238	0.373526	0.537684	0.496574
507.256	0.561378	0.564826	0.551577	0.662605	0.551737	0.599091	0.954663	0.867574	0.854001	1.00428	0.926366	0.969719	0.599256	0.498748	0.64778	0.517746	0.591957		0.474085	0.474685	0.453162	0.463782	0.442373	0.43736		0.815462	0.810231	0.712082	0.756448	0.794349	0.84235	0.775229	0.569098	0.459839	0.406093	0.552785	0.508324
509.26	0.53594	0.631374	0.62093	0.664293	0.725583	0.672411	0.941017	0.909631	0.887722	0.989599	0.972812	0.938913	0.646259	0.48127	0.675147	0.508342	0.545315		0.456922	0.493836	0.472842	0.401515	0.413583	0.435586		0.785548	0.763489	0.735842	0.792316	0.805387	0.832993	0.748951	0.540609	0.461887	0.352749	0.547199	0.390847
511.263	0.62837	0.539812	0.605107	0.613916	0.61707	0.540218	0.973098	0.90234	0.855225	0.98634	0.987217	0.92266	0.587358	0.545883	0.683697	0.520768	0.532525		0.447659	0.404143	0.388788	0.42407	0.345884	0.532625		0.837359	0.805326	0.757131	0.799249	0.786889	0.82864	0.827809	0.368797	0.483423	0.349498	0.533818	0.434098
513.266	0.562938	0.601723	0.659039	0.677577	0.639742	0.719173	0.969486	0.902279	0.873289	1.00646	1.00178	0.96445	0.622888	0.501755	0.605076	0.538204	0.605583		0.465085	0.472099	0.402509	0.453967	0.393634	0.508546		0.818896	0.792581	0.734997	0.795905	0.763819	0.821275	0.773607	0.597958	0.476839	0.41873	0.57725	0.550646
515.27	0.601906	0.631481	0.603769	0.649935	0.654761	0.598066	0.988004	0.892234	0.860672	0.960766	1.01873	0.941342	0.576757	0.435567	0.756021	0.507184	0.465795		0.443985	0.448568	0.474905	0.391863	0.337998	0.358645		0.799427	0.776238	0.730837	0.763175	0.780297	0.875848	0.76562	0.463666	0.500443	0.393114	0.516695	0.517145
517.261	0.668102	0.621327	0.702793	0.595405	0.715407	0.643491	0.94929	0.895658	0.836932	1.004	1.02452	0.917577	0.6172	0.485665	0.768367	0.591581	0.53883		0.43265	0.452407	0.485979	0.44219	0.384927	0.435468		0.836829	0.772305	0.722662	0.761783	0.818855	0.86917	0.728954	0.505988	0.491163	0.381153	0.511513	0.461613
519.264	0.5754	0.580822	0.680775	0.628821	0.615037	0.625607	0.944017	0.912212	0.828783	0.999205	1.0172	0.91297	0.610014	0.491804	0.669627	0.533981	0.57448		0.406617	0.466546	0.44489	0.41291	0.327621	0.492241		0.809715	0.801808	0.754918	0.77121	0.810508	0.824844	0.795002	0.517151	0.413295	0.458805	0.538403	0.557024
521.268	0.601816	0.528396	0.665193	0.483878	0.653145	0.664108	0.954453	0.916837	0.874557	1.06555	1.02813	0.921782	0.661176	0.4397	0.6285	0.577187	0.548273		0.451273	0.561214	0.416813	0.426809	0.424274	0.443922		0.798671	0.795831	0.746536	0.777811	0.821962	0.830823	0.779388	0.520166	0.538798	0.396396	0.497153	0.50597
523.259	0.607488	0.6442	0.632777	0.596606	0.615755	0.727924	0.982005	0.910874	0.828559	1.04621	0.939556	0.960291	0.616472	0.463127	0.734087	0.567973	0.538445		0.361599	0.468409	0.536587	0.41952	0.374493	0.448924		0.832945	0.8148	0.72736	0.770875	0.809708	0.814655	0.776058	0.378221	0.450409	0.365953	0.514329	0.375176
525.262	0.550121	0.605216	0.688214	0.518547	0.630511	0.605639	0.94764	0.948648	0.872195	0.936306	0.985907	0.932955	0.596098	0.461806	0.733361	0.684861	0.558403		0.453008	0.441066	0.500105	0.418665	0.438479	0.426219		0.820221	0.814403	0.735935	0.788286	0.816159	0.802951	0.773922	0.443695	0.487819	0.44758	0.521104	0.415098
527.265	0.602639	0.673429	0.620611	0.662056	0.62331	0.600037	0.963248	0.871289	0.872425	1.00136	1.00481	0.936774	0.62534	0.488627	0.705904	0.62604	0.571233		0.504696	0.449947	0.480731	0.435781	0.264051	0.51172		0.845216	0.814131	0.720338	0.811141	0.76071	0.829319	0.754801	0.436501	0.444068	0.395454	0.470655	0.456605
529.269	0.609333	0.628842	0.655375	0.635109	0.706373	0.68572	0.935883	0.89833	0.878251	1.03925	1.07295	0.948489	0.638753	0.449806	0.676082	0.549723	0.533763		0.418955	0.407943	0.435845	0.409048	0.488031	0.475085		0.839384	0.819333	0.721289	0.785016	0.811868	0.84818	0.780284	0.47296	0.516008	0.451543	0.588771	0.457951
531.272	0.546006	0.692132	0.686681	0.678473	0.680648	0.662764	0.926683	0.906603	0.880353	0.950354	1.00823	0.945113	0.622678	0.539553	0.713665	0.586268	0.569278		0.495986	0.45207	0.481947	0.447023	0.340056	0.480855		0.843535	0.760761	0.760864	0.808186	0.743798	0.809669	0.757286	0.535829	0.454917	0.340514	0.547631	0.378155
533.275	0.593817	0.692734	0.7022	0.628827	0.630252	0.624842	0.987965	0.933349	0.872414	0.995782	0.995358	1.00357	0.573429	0.449328	0.661408	0.557203	0.623731		0.43694	0.455853	0.426817	0.398137	0.396762	0.47392		0.812249	0.753321	0.718158	0.808251	0.780011	0.824321	0.769405	0.560309	0.477952	0.347339	0.517396	0.439241
535.279	0.602019	0.603564	0.601894	0.622262	0.599918	0.661927	0.969596	0.885454	0.877558	0.958035	1.00254	0.936262	0.589266	0.460733	0.726562	0.611202	0.480162		0.410803	0.522782	0.452613	0.428901	0.320182	0.419964		0.799603	0.768489	0.726562	0.786779	0.747259	0.825663	0.820943	0.433761	0.479252	0.378556	0.502743	0.456185
537.27	0.600001	0.604903	0.613567	0.619759	0.651973	0.580016	0.973806	0.929434	0.8402	0.931003	1.01902	0.931544	0.59738	0.482563	0.667325	0.561294	0.475461		0.479844	0.507836	0.421761	0.465525	0.363302	0.414791		0.80011	0.794465	0.676889	0.786452	0.740056	0.810659	0.760319	0.526681	0.429144	0.36046	0.520586	0.382422
539.274	0.518772	0.613445	0.638775	0.556136	0.645003	0.681416	1.00266	0.922332	0.870841	1.04582	0.969839	1.00456	0.63123	0.493759	0.67935	0.536247	0.566542		0.489593	0.442091	0.350952	0.389467	0.37359	0.378579		0.830609	0.766064	0.699502	0.827748	0.752752	0.836674	0.763682	0.445607	0.487222	0.387464	0.545786	0.459553
541.278	0.644141	0.59699	0.6647	0.576598	0.673137	0.636753	0.95174	0.895434	0.856995	0.985998	1.00798	0.946443	0.587338	0.544542	0.686164	0.557234	0.578387		0.499223	0.395582	0.428364	0.461954	0.269572	0.464119		0.828227	0.80037	0.710278	0.792177	0.802919	0.826711	0.755395	0.491811	0.540689	0.39417	0.492154	0.38991
543.281	0.570938	0.677216	0.65208	0.67265	0.751899	0.616955	0.970034	0.874668	0.895215	0.928215	1.02043	1.0029	0.581969	0.497517	0.667857	0.436275	0.51864		0.464753	0.440165	0.421691	0.412116	0.316534	0.431915		0.7989	0.791907	0.722797	0.786105	0.820223	0.849589	0.74556	0.413745	0.45601	0.459922	0.505157	0.456968
545.272	0.613347	0.618135	0.652988	0.633603	0.643103	0.681601	0.939153	0.949298	0.878013	0.942244	1.02795	0.963726	0.658458	0.472486	0.768987	0.477675	0.597145		0.501862	0.39901	0.372848	0.439815	0.32001	0.450133		0.780337	0.814961	0.73129	0.806357	0.756646	0.83553	0.759716	0.50118	0.481753	0.374445	0.534858	0.408343
547.275	0.598716	0.662586	0.684851	0.636259	0.680815	0.664629	1.0105	0.902485	0.889722	0.986625	0.993695	0.917593	0.60889	0.497571	0.628381	0.563051	0.61708		0.413294	0.505763	0.410202	0.461689	0.237089	0.52482		0.836538	0.804323	0.683909	0.790053	0.757536	0.884009	0.747169	0.533293	0.518302	0.413682	0.485601	0.458289
549.279	0.578362	0.65085	0.69355	0.595175	0.703883	0.633127	0.98604	0.914252	0.895385	0.966363	1.05445	1.0205	0.605399	0.53055	0.780861	0.550839	0.579778		0.470218	0.472579	0.35627	0.386827	0.267458	0.474965		0.784521	0.799456	0.673258	0.793072	0.79204	0.84398	0.807928	0.468485	0.500522	0.399745	0.457597	0.480101
551.282	0.629521	0.618442	0.693166	0.609149	0.788785	0.602288	0.963255	0.917254	0.887744	0.983998	0.979008	0.925522	0.609059	0.453866	0.664894	0.528413	0.5159		0.510819	0.475474	0.403855	0.471075	0.356727	0.417474		0.802609	0.786818	0.716276	0.723607	0.804086	0.874636	0.80848	0.465935	0.464522	0.40325	0.487557	0.451461
553.285	0.583092	0.625528	0.67429	0.650327	0.705948	0.649103	0.959537	0.873127	0.898036	1.00639	1.0069	0.904593	0.61484	0.521291	0.748231	0.511827	0.527536		0.627624	0.436515	0.461079	0.378472	0.279891	0.448084		0.806309	0.770908	0.70277	0.761369	0.808733	0.834199	0.784015	0.540063	0.414003	0.397153	0.544383	0.406232
555.289	0.559702	0.622805	0.698097	0.639837	0.618777	0.690099	0.95339	0.958909	0.894519	0.950715	0.977521	0.97419	0.595996	0.452485	0.623004	0.593871	0.589647		0.52428	0.504127	0.428012	0.37431	0.375323	0.544159		0.791242	0.777944	0.736283	0.780804	0.784413	0.867762	0.77576	0.570809	0.484925	0.391546	0.547942	0.448119
557.28	0.572624	0.547821	0.646698	0.628696	0.651706	0.554455	0.998431	0.885599	0.914341	0.921468	0.89829	0.967413	0.626439	0.485529	0.770968	0.562633	0.601389		0.507584	0.515191	0.422533	0.425215	0.32637	0.368458		0.829314	0.800219	0.74664	0.792149	0.766854	0.860143	0.793445	0.545582	0.432849	0.315225	0.59303	0.442754
559.283	0.575034	0.582233	0.762631	0.592908	0.746013	0.646726	0.950545	0.930416	0.887089	0.953989	0.986349	0.959194	0.609705	0.600444	0.755876	0.553422	0.515003		0.503797	0.416072	0.401387	0.418247	0.290774	0.338853		0.801625	0.76674	0.72966	0.844408	0.774483	0.817866	0.772391	0.51321	0.430995	0.419807	0.493997	0.515271
561.286	0.544473	0.518347	0.689995	0.655197	0.67988	0.627776	0.948315	0.969589	0.887644	0.991976	0.964322	0.950935	0.696248	0.555164	0.763384	0.592316	0.510758		0.433059	0.428217	0.464271	0.437789	0.328225	0.394342		0.819883	0.768601	0.708652	0.804334	0.795709	0.863233	0.778251	0.458627	0.42586	0.423618	0.404266	0.469835
563.29	0.599466	0.682419	0.729866	0.593481	0.6376	0.69822	1.01434	0.911095	0.916972	0.963785	0.958753	0.948433	0.561812	0.483445	0.657533	0.629669	0.623616		0.503488	0.447009	0.475618	0.416571	0.393493	0.399071		0.848349	0.755028	0.730908	0.825899	0.756837	0.8191	0.832693	0.557852	0.425613	0.331979	0.646047	0.319523
565.281	0.527407	0.673324	0.666286	0.65023	0.637675	0.69137	1.02366	0.919559	0.863884	0.988246	0.960731	0.966223	0.56288	0.556082	0.716878	0.542428	0.566969		0.474635	0.490814	0.396983	0.500158	0.338059	0.472919		0.844891	0.786754	0.754579	0.801834	0.775655	0.827752	0.803872	0.543755	0.444672	0.415838	0.585521	0.49134
567.284	0.616914	0.599031	0.730554	0.556908	0.60484	0.659873	0.986161	0.957586	0.911027	0.965022	0.9805	0.897539	0.638341	0.474657	0.714043	0.579768	0.528023		0.501643	0.528093	0.389088	0.335222	0.346736	0.449749		0.82081	0.79476	0.762981	0.798699	0.774478	0.854748	0.839951	0.540934	0.471474	0.368919	0.494532	0.447687
569.288	0.550959	0.576126	0.668572	0.54597	0.663941	0.746267	0.999484	0.931161	0.891797	0.96927	0.962305	0.952159	0.600515	0.48553	0.696758	0.43315	0.555099		0.468831	0.438437	0.379767	0.382649	0.418985	0.459087		0.851803	0.78843	0.757607	0.815901	0.761865	0.844962	0.817966	0.488654	0.562159	0.365273	0.578781	0.383113
571.291	0.655544	0.59731	0.715998	0.699593	0.64113	0.683814	1.0402	0.928468	0.886448	0.954492	1.00309	0.917206	0.630821	0.425805	0.761943	0.662672	0.597316		0.560903	0.491375	0.33848	0.437777	0.24374	0.385663		0.84955	0.808476	0.754534	0.795872	0.783111	0.810176	0.841152	0.488217	0.527677	0.400647	0.592793	0.426567
573.295	0.517106	0.615229	0.665251	0.682471	0.696529	0.712794	0.971067	0.924215	0.830282	1.00264	0.99244	0.972952	0.541013	0.459014	0.748749	0.626813	0.568963		0.506135	0.451527	0.43772	0.398047	0.36779	0.463349		0.84999	0.80313	0.756296	0.780862	0.781624	0.817363	0.780149	0.541615	0.471474	0.45479	0.503306	0.342689
575.299	0.551922	0.670014	0.722039	0.550555	0.645622	0.685527	0.964645	0.947845	0.906092	0.963241	0.986461	0.938076	0.639922	0.481918	0.758932	0.591578	0.552882		0.396117	0.485818	0.417302	0.44191	0.32979	0.386221		0.831256	0.791437	0.711791	0.817265	0.792071	0.840809	0.794533	0.414156	0.476312	0.399692	0.562884	0.373206
577.29	0.559553	0.659315	0.650579	0.663557	0.625199	0.676032	0.964996	0.881712	0.870588	0.916942	0.947684	0.914361	0.579658	0.476964	0.729594	0.618282	0.56914		0.469661	0.439203	0.478985	0.476186	0.394454	0.35446		0.856855	0.78493	0.723132	0.818123	0.752842	0.797899	0.786969	0.475248	0.467314	0.286792	0.573847	0.473269
579.293	0.572755	0.638883	0.773779	0.696782	0.697534	0.678333	0.999933	0.945417	0.865611	0.988636	1.02216	0.951338	0.632849	0.445571	0.704004	0.522142	0.503601		0.454692	0.437102	0.457963	0.462235	0.293725	0.436627		0.838294	0.806773	0.724681	0.826751	0.779349	0.80876	0.807395	0.581301	0.496462	0.368311	0.650746	0.3132
581.297	0.670745	0.6025	0.64772	0.574351	0.72406	0.687947	0.987097	0.902217	0.940291	0.96612	0.989287	0.914415	0.635211	0.472104	0.722327	0.565284	0.467786		0.443127	0.443866	0.478824	0.423142	0.344289	0.392343		0.868306	0.797679	0.711117	0.80524	0.723378	0.838399	0.792657	0.510459	0.381909	0.406533	0.613244	0.414151
583.288	0.663418	0.673034	0.676001	0.617212	0.713396	0.663181	0.971143	0.906249	0.916319	1.03265	0.998274	0.911264	0.558257	0.492572	0.798033	0.464426	0.462861		0.510062	0.4779	0.470559	0.430156	0.396553	0.456841		0.816859	0.768911	0.714597	0.812392	0.766919	0.859109	0.827854	0.571303	0.454881	0.398451	0.488433	0.414235
585.291	0.616785	0.611628	0.701022	0.658235	0.725125	0.71514	0.981649	0.930218	0.918194	0.972728	1.0619	0.911528	0.646173	0.497596	0.744821	0.546508	0.553871		0.541566	0.407206	0.42181	0.425747	0.380617	0.388406		0.812029	0.787903	0.735132	0.825147	0.754442	0.849289	0.824245	0.543031	0.42632	0.426022	0.588985	0.414738
587.294	0.644827	0.648744	0.796507	0.632771	0.714776	0.704614	0.965102	0.914319	0.888944	0.945244	1.05483	0.936572	0.65303	0.529667	0.812298	0.580964	0.49837		0.44962	0.495266	0.442222	0.498443	0.268314	0.483059		0.842758	0.790193	0.731938	0.824822	0.82157	0.837847	0.85109	0.527505	0.482716	0.3944	0.573149	0.431718
589.298	0.601411	0.661494	0.771766	0.609482	0.644469	0.570484	0.994728	0.941735	0.878782	1.03767	0.981355	0.900954	0.647938	0.48222	0.685982	0.565922	0.583801		0.429538	0.464608	0.446412	0.425839	0.32643	0.440405		0.864455	0.792786	0.712045	0.844949	0.786321	0.832446	0.811846	0.551675	0.494626	0.430871	0.577843	0.504942
591.301	0.599802	0.732006	0.705312	0.63039	0.580381	0.614121	0.984055	0.943801	0.885059	0.966771	0.966383	0.966257	0.609418	0.492646	0.761969	0.537783	0.540049		0.500526	0.522911	0.514526	0.456074	0.395196	0.461246		0.846934	0.789208	0.752796	0.793949	0.805981	0.824749	0.827022	0.425699	0.469555	0.401031	0.514933	0.551471
593.292	0.659919	0.680333	0.697302	0.598659	0.663072	0.655795	0.996797	0.896465	0.876475	0.996107	0.975208	0.966844	0.587262	0.517426	0.73669	0.5131	0.55499		0.542456	0.480362	0.449194	0.446995	0.275527	0.47326		0.865867	0.76981	0.753121	0.76973	0.784146	0.849143	0.823328	0.537912	0.465072	0.39925	0.507328	0.493113
595.295	0.638919	0.613029	0.683721	0.598696	0.710406	0.703191	1.02088	0.931577	0.889087	0.987128	1.07461	0.941556	0.656087	0.524672	0.783719	0.551531	0.582521		0.479157	0.46076	0.445672	0.520769	0.406634	0.402791		0.850828	0.744817	0.766727	0.808095	0.755758	0.863169	0.865346	0.502487	0.460765	0.381137	0.551693	0.365424
597.299	0.596556	0.680768	0.718705	0.609486	0.739183	0.676136	0.99904	0.936678	0.897039	0.967837	0.994366	0.933234	0.628484	0.502413	0.711904	0.582924	0.570067		0.561001	0.451348	0.447959	0.454996	0.364096	0.403274		0.84627	0.801537	0.778551	0.808143	0.765257	0.824103	0.838755	0.527903	0.516096	0.344282	0.520554	0.572375

## Sheet: G2
time (s)	STAG1-EGFP H8 G2						STAG2-EGFP F2 G2										EGFP-STAG1 H4 G2
-18.9669	0.988353	0.972654	1.00843	1.05802	0.974344	0.997292	0.986926	0.966693	1.00509	1.01037	1.00504	0.975281	0.986224				1.07672	1.02745	0.988506	1.01345	1.02837
-16.9854	1.04784	1.04321	0.982192	0.998565	1.01767	0.975519	1.00584	1.01903	1.00534	1.01402	0.987043	0.984134	1.00962				1.00254	1.02399	1.02115	0.987494	0.956017
-14.9942	0.960578	0.964821	1.02183	0.94481	1.01854	0.949972	1.02055	1.00115	1.01902	1.00615	0.966563	0.999305	1.04437				0.923609	0.986297	0.967019	0.994968	0.947737
-12.9909	1.03918	1.00365	1.0121	0.979217	1.01246	1.11312	0.992025	1.00233	1.00107	1.00285	0.962266	1.00029	1.00298				0.994619	1.02052	0.992117	1.01116	1.06093
-10.9876	0.997637	0.908511	0.977448	1.07376	1.09292	1.03207	1.02759	1.00337	0.997514	0.995087	0.97137	1.01056	0.992163				0.940442	1.03096	0.976839	0.994173	0.956565
-8.98425	0.933065	1.02092	1.01305	1.03412	0.953236	0.982644	0.979421	0.994758	0.972848	0.953106	1.01885	0.992366	0.969408				0.975389	1.01019	1.01425	0.992289	1.02129
-6.98095	0.965786	1.02435	0.994041	0.960633	0.935897	0.955313	0.998572	1.00984	1.01457	1.00088	1.03608	0.993474	1.00737				1.02361	1.0161	0.986656	0.910812	1.02424
-4.98973	1.00673	1.04004	0.983765	1.01068	0.989414	1.05209	0.975388	0.991819	0.985357	1.00663	1.04005	0.993877	0.963587				1.08725	0.944444	1.02675	0.948384	0.944273
-2.98642	1.03176	1.02419	0.971854	0.917988	1.014	0.958231	0.992062	0.996695	1.00316	0.999967	1.03394	1.04015	0.998274				0.95352	0.959327	1.02469	1.05686	1.05485
-0.983115	1.02907	0.99765	1.0353	1.0222	0.991525	0.983747	1.02164	1.01432	0.996019	1.01094	0.978798	1.01057	1.026				1.02231	0.980727	1.00202	1.09041	1.00574
0	0	0	0	0	0	0	0	0	0	0	0	0	0				0	0	0	0	0
1.01829	0.062625	0.074871	0.083445	0.108161	0.056859	0.050613	0.06761	0.091338	0.078975	0.095966	0.157294	0.141304	0.122289				0.129577	0.07702	0.037142	0.10494	0.101675
3.0216	0.050017	0.083984	0.121964	0.104197	0.089471	0.075534	0.152176	0.129706	0.152831	0.141919	0.248994	0.200127	0.194936				0.199661	0.135678	0.131162	0.177228	0.051848
5.01282	0.081973	0.140704	0.152342	0.138178	0.043583	0.021073	0.178223	0.163776	0.192685	0.177653	0.290984	0.226912	0.215329				0.119605	0.096333	0.091575	0.197012	0.137322
7.01612	0.134452	0.132738	0.120112	0.104173	0.040611	0.156146	0.211863	0.165585	0.225047	0.222068	0.299981	0.250743	0.2388				0.180966	0.083855	0.174158	0.136163	0.245034
9.01887	0.050296	0.12094	0.143182	0.157017	0.167527	0.094538	0.215968	0.192685	0.238093	0.220829	0.335923	0.257489	0.251706				0.215496	0.080754	0.150802	0.153588	0.177667
11.0222	0.049058	0.17517	0.142041	0.178584	0.140567	0.105706	0.239101	0.227473	0.261728	0.229988	0.329278	0.267049	0.297308				0.257893	0.129615	0.147971	0.195216	0.146323
13.0267	0.072865	0.087518	0.162407	0.154265	0.097553	0.082704	0.27252	0.239448	0.260001	0.254006	0.343204	0.284044	0.292778				0.237748	0.097237	0.148415	0.207892	0.134431
15.03	0.08174	0.062058	0.149312	0.087619	0.107806	0.042407	0.275071	0.229528	0.267233	0.239848	0.364584	0.316378	0.333045				0.172776	0.138169	0.184163	0.156864	0.154025
17.0212	0.106321	0.192376	0.163891	0.157588	0.16276	0.098157	0.263018	0.251389	0.264423	0.254023	0.357315	0.327539	0.293555				0.23011	0.182681	0.201198	0.260036	0.246831
19.0245	0.149677	0.168494	0.223603	0.178097	0.026616	0.125875	0.274194	0.271185	0.28936	0.282796	0.379751	0.348537	0.292654				0.139137	0.210169	0.151636	0.274054	0.202622
21.0278	0.110803	0.210879	0.206686	0.143992	0.081279	0.185193	0.264919	0.291757	0.294555	0.290777	0.389981	0.362406	0.319185				0.163684	0.180678	0.171127	0.191786	0.243033
23.0311	0.128823	0.212575	0.17423	0.142195	0.133775	0.115533	0.299885	0.272145	0.307656	0.249925	0.397877	0.372837	0.337351				0.176235	0.181445	0.201645	0.189465	0.160617
25.0344	0.135599	0.253692	0.156198	0.129917	0.10661	0.142445	0.307277	0.264526	0.298207	0.297835	0.415913	0.354101	0.355207				0.168956	0.155199	0.1521	0.266366	0.21657
27.0377	0.065536	0.217031	0.164331	0.159873	0.117429	0.076222	0.317258	0.288025	0.314479	0.301126	0.41194	0.378365	0.30817				0.22834	0.216979	0.156672	0.205495	0.256374
29.029	0.061641	0.200347	0.209567	0.156141	0.073939	0.158842	0.293986	0.283615	0.339805	0.309141	0.393803	0.379767	0.361832				0.235409	0.151269	0.226535	0.190755	0.161254
31.0323	0.11819	0.204708	0.203236	0.250687	0.11937	0.100079	0.30547	0.292641	0.343416	0.298326	0.397236	0.412936	0.364186				0.162706	0.147964	0.22586	0.234749	0.272066
33.0356	0.042192	0.209309	0.20241	0.128666	0.111126	0.062856	0.320243	0.310929	0.349	0.312885	0.390623	0.39625	0.380986				0.195806	0.16221	0.199394	0.161936	0.273177
35.0268	0.090872	0.223356	0.173841	0.187793	0.148259	0.098144	0.336665	0.299094	0.340807	0.329638	0.375919	0.397279	0.388533				0.193029	0.183418	0.207199	0.233377	0.342995
37.0301	0.067655	0.266437	0.205909	0.14914	0.119604	0.191456	0.346173	0.296819	0.33037	0.366017	0.420197	0.448362	0.362365				0.236719	0.160425	0.19947	0.213967	0.213667
39.0334	0.024025	0.201775	0.191566	0.167755	0.155952	0.079602	0.328988	0.314386	0.355324	0.350661	0.412533	0.442051	0.414449				0.261196	0.157173	0.205419	0.328477	0.241683
41.0367	0.119919	0.213614	0.248166	0.186151	0.158704	0.099678	0.317234	0.317126	0.350463	0.349252	0.407795	0.402443	0.417475				0.2865	0.149963	0.155921	0.244963	0.184074
43.04	0.049092	0.195386	0.203342	0.174408	0.149351	0.114908	0.310345	0.335676	0.367158	0.35228	0.414035	0.418395	0.401487				0.206657	0.169806	0.184797	0.295474	0.207153
45.0433	0.018738	0.277765	0.231064	0.200172	0.090189	0.151353	0.354181	0.338698	0.389772	0.366314	0.460851	0.400223	0.388053				0.231187	0.153522	0.18796	0.216281	0.254603
47.0346	0.028132	0.218908	0.215395	0.181671	0.101326	0.096653	0.352009	0.339075	0.383483	0.35102	0.479999	0.43277	0.422383				0.245198	0.194624	0.188563	0.320853	0.16191
49.0391	0.06551	0.13977	0.208266	0.170791	0.063709	0.085069	0.354611	0.331748	0.370151	0.342969	0.443004	0.423768	0.407497				0.233673	0.187431	0.187843	0.211965	0.175022
51.0424	0.012341	0.284216	0.221479	0.208371	0.121416	0.158925	0.374889	0.346342	0.402388	0.386085	0.469171	0.439383	0.432332				0.311242	0.230577	0.193016	0.308914	0.187046
53.0457	-0.06627	0.191194	0.257815	0.203068	0.08855	0.089857	0.391237	0.351729	0.412658	0.38695	0.505566	0.456033	0.440686				0.266382	0.177203	0.2267	0.240707	0.240817
55.0369	0.01694	0.26312	0.30924	0.193332	0.190403	0.180951	0.402128	0.364741	0.407185	0.406038	0.496375	0.455503	0.440608				0.245258	0.073183	0.27751	0.272053	0.244314
57.0402	0.036769	0.2559	0.2463	0.205049	0.10829	0.095528	0.374204	0.336881	0.423526	0.410999	0.464132	0.472522	0.422118				0.273793	0.182063	0.241164	0.278573	0.218709
59.0435	0.095006	0.225696	0.219721	0.17765	0.128261	0.15431	0.388322	0.351019	0.412216	0.396834	0.489486	0.465881	0.42705				0.260597	0.211513	0.221676	0.211955	0.14095
61.0468	0.042297	0.302161	0.257468	0.15595	0.123725	0.209582	0.425085	0.35834	0.441196	0.411988	0.463286	0.473518	0.420783				0.227064	0.222345	0.207019	0.287366	0.263295
63.0501	0.0944	0.26226	0.274123	0.208621	0.176137	0.179934	0.372569	0.352925	0.408533	0.415426	0.482129	0.491191	0.442052				0.276031	0.233428	0.246932	0.176341	0.224264
65.0534	0.078168	0.294549	0.245551	0.215677	0.130932	0.156772	0.414672	0.351488	0.41606	0.456468	0.490952	0.49616	0.440285				0.239219	0.150606	0.213959	0.23167	0.233416
67.0446	0.114486	0.266892	0.242521	0.207614	0.060597	0.073932	0.396024	0.372259	0.424152	0.443276	0.503141	0.522132	0.426537				0.277631	0.203154	0.262567	0.258891	0.16526
69.0479	0.096736	0.259664	0.204437	0.157138	0.151492	0.142128	0.446592	0.37583	0.403025	0.424452	0.503043	0.532418	0.45526				0.231726	0.189447	0.205051	0.232708	0.153725
71.0512	-0.00212	0.250626	0.267909	0.222112	0.166639	0.167468	0.439568	0.379811	0.437717	0.428823	0.495177	0.5046	0.463407				0.307782	0.136629	0.198617	0.262532	0.231732
74.0502	0.116792	0.282295	0.244955	0.209056	0.165963	0.147525	0.440055	0.387627	0.440888	0.418269	0.500459	0.524964	0.439818				0.25107	0.229845	0.250128	0.209255	0.264809
78.0507	0.061291	0.2674	0.283183	0.247634	0.077388	0.154102	0.457002	0.396005	0.448868	0.436336	0.509216	0.55373	0.435795				0.276803	0.176594	0.219219	0.266114	0.24939
82.058	0.105303	0.289791	0.274484	0.231767	0.17824	0.191347	0.460974	0.417821	0.463035	0.452372	0.531242	0.520628	0.447789				0.259279	0.192378	0.241982	0.254328	0.255645
86.0531	0.119518	0.299011	0.290934	0.208226	0.171334	0.139244	0.486254	0.401507	0.49298	0.448796	0.52545	0.561709	0.456945				0.309062	0.274562	0.229187	0.334364	0.260831
90.0597	0.07289	0.299147	0.296757	0.217513	0.171071	0.222508	0.487772	0.421969	0.496036	0.472566	0.550325	0.535979	0.492237				0.295749	0.212734	0.274133	0.309284	0.270211
94.0602	0.050182	0.273656	0.29006	0.227811	0.166163	0.168524	0.505918	0.431266	0.504103	0.4713	0.531881	0.571082	0.477644				0.298669	0.222148	0.26712	0.30357	0.263237
98.0608	0.086388	0.244215	0.308495	0.231352	0.168006	0.207412	0.503569	0.429883	0.480762	0.48946	0.537249	0.545982	0.500627				0.265351	0.219042	0.259141	0.318901	0.321651
102.067	0.105109	0.275325	0.310774	0.222974	0.183956	0.182797	0.516593	0.445718	0.509926	0.501189	0.544874	0.570995	0.479273				0.285483	0.25663	0.272005	0.349187	0.291472
106.062	0.114927	0.275162	0.279343	0.278165	0.137481	0.198485	0.500559	0.473384	0.491949	0.485686	0.558775	0.588953	0.466047				0.263977	0.226777	0.26524	0.323084	0.277755
110.069	0.097015	0.283431	0.272816	0.238758	0.136873	0.192441	0.52156	0.449884	0.498234	0.528206	0.559339	0.59148	0.504386				0.285321	0.238382	0.250645	0.323546	0.377257
114.076	0.147987	0.274145	0.299468	0.275866	0.257946	0.223677	0.523194	0.483373	0.505996	0.539865	0.566087	0.590426	0.524246				0.261122	0.222765	0.277831	0.301641	0.241382
118.07	0.170982	0.283705	0.323595	0.249833	0.127509	0.213869	0.528888	0.473506	0.522326	0.522353	0.580195	0.588093	0.505805				0.291924	0.231443	0.246313	0.312742	0.274192
122.078	0.110575	0.277874	0.339305	0.235278	0.13886	0.145148	0.528634	0.487871	0.528643	0.537415	0.574171	0.604966	0.501308				0.349222	0.265244	0.264873	0.337985	0.256322
126.078	0.202639	0.292555	0.272606	0.254883	0.185239	0.145061	0.517554	0.498398	0.521864	0.556715	0.605225	0.593031	0.530428				0.299186	0.242751	0.275582	0.341889	0.267274
130.079	0.141217	0.322017	0.299603	0.244238	0.18826	0.202908	0.521604	0.497943	0.543074	0.563682	0.622278	0.596407	0.549447				0.258861	0.264054	0.259236	0.322352	0.287369
134.085	0.193931	0.34021	0.296375	0.294587	0.20727	0.180992	0.496788	0.481636	0.535732	0.574164	0.601505	0.582556	0.540941				0.317054	0.283342	0.265135	0.368593	0.291575
138.08	0.134478	0.231623	0.258895	0.320814	0.131831	0.224951	0.544247	0.504234	0.542727	0.553332	0.596592	0.612647	0.552223				0.308085	0.313781	0.232913	0.342141	0.317054
142.087	0.180583	0.317814	0.277325	0.341505	0.167991	0.161257	0.529819	0.523843	0.560132	0.590894	0.616926	0.639501	0.551297				0.335723	0.31051	0.244745	0.371685	0.295026
146.087	0.252544	0.315698	0.291313	0.232549	0.193947	0.221762	0.571743	0.549255	0.574497	0.577795	0.597025	0.594109	0.551006				0.345051	0.253676	0.219496	0.361443	0.35025
150.088	0.272288	0.261772	0.269329	0.242201	0.197043	0.22727	0.558952	0.541751	0.580176	0.58717	0.633941	0.640841	0.578474				0.319032	0.280683	0.272717	0.327985	0.34695
154.095	0.288047	0.284449	0.295731	0.297394	0.160414	0.175859	0.562747	0.527034	0.586885	0.597693	0.617029	0.670551	0.553303				0.343123	0.227031	0.290071	0.35915	0.330222
158.09	0.203951	0.295356	0.287815	0.278388	0.205619	0.217529	0.586296	0.540754	0.585982	0.589264	0.601983	0.638875	0.562703				0.351687	0.250694	0.259394	0.368422	0.311355
162.096	0.241854	0.310783	0.289665	0.261582	0.217424	0.240597	0.592108	0.559924	0.580147	0.612616	0.628764	0.639177	0.534558				0.364711	0.296666	0.243117	0.365417	0.343796
166.097	0.277883	0.296053	0.233557	0.260516	0.223048	0.201751	0.58249	0.571182	0.579463	0.623524	0.608017	0.641104	0.552932				0.29908	0.273232	0.264795	0.376258	0.313988
170.098	0.266671	0.322369	0.296483	0.248565	0.250926	0.230473	0.588125	0.573735	0.584118	0.621531	0.656294	0.660663	0.551266				0.219471	0.297458	0.239846	0.382908	0.265524
175.102	0.237577	0.263084	0.280923	0.248244	0.227671	0.252178	0.57595	0.586073	0.60352	0.63893	0.631869	0.644966	0.5959				0.302297	0.31845	0.282871	0.307447	0.34582
181.104	0.248356	0.299831	0.272575	0.250674	0.252245	0.226863	0.60504	0.576422	0.576267	0.618663	0.654836	0.682392	0.603791				0.314302	0.359657	0.254523	0.375865	0.323398
187.102	0.201316	0.313667	0.271394	0.341049	0.204373	0.242276	0.60393	0.580701	0.599427	0.643913	0.648597	0.685763	0.593003				0.288163	0.35149	0.302088	0.408573	0.301571
193.109	0.291933	0.293187	0.321268	0.289383	0.301963	0.187227	0.619188	0.577448	0.60401	0.617394	0.657564	0.681023	0.623559				0.323828	0.330983	0.253501	0.439793	0.314018
199.114	0.243247	0.336534	0.298754	0.318123	0.282466	0.24034	0.625222	0.602573	0.605258	0.650286	0.673749	0.659062	0.624545				0.297896	0.340869	0.272502	0.343166	0.303491
205.116	0.270327	0.354609	0.303858	0.28827	0.247829	0.243283	0.607783	0.597207	0.62006	0.637399	0.675938	0.668732	0.613564				0.336	0.360359	0.27785	0.412983	0.32399
211.118	0.278461	0.298733	0.310016	0.289937	0.255685	0.294083	0.638034	0.614731	0.628377	0.652805	0.668939	0.692119	0.643848				0.318008	0.35562	0.304414	0.391339	0.310296
217.117	0.290682	0.324454	0.339119	0.299784	0.259037	0.273198	0.672126	0.607723	0.641317	0.653172	0.700955	0.708898	0.647852				0.337741	0.311014	0.306353	0.385516	0.317542
223.123	0.198669	0.340042	0.339687	0.265319	0.267386	0.282297	0.632309	0.615017	0.633952	0.646741	0.66926	0.698904	0.645895				0.284425	0.389822	0.329571	0.372067	0.350569
229.125	0.256804	0.329459	0.342819	0.30598	0.249783	0.241603	0.655538	0.610623	0.623382	0.662785	0.661456	0.688134	0.65538				0.306358	0.260729	0.30578	0.387226	0.302445
235.127	0.278608	0.314282	0.341829	0.280887	0.290135	0.247015	0.634938	0.646347	0.625604	0.677709	0.677893	0.691075	0.685758				0.323385	0.35413	0.268183	0.388085	0.349213
241.133	0.249749	0.341309	0.334083	0.299469	0.239684	0.269253	0.655446	0.635274	0.661318	0.674471	0.688251	0.693405	0.63372				0.343219	0.343417	0.296581	0.334981	0.320506
247.131	0.31645	0.335362	0.40709	0.322254	0.27204	0.257344	0.651274	0.643966	0.654854	0.689634	0.691227	0.684206	0.683829				0.333594	0.356274	0.293794	0.393745	0.288956
253.142	0.294859	0.3288	0.357993	0.321436	0.258725	0.276548	0.66108	0.660445	0.630747	0.681479	0.700766	0.66599	0.678124				0.334517	0.356563	0.310942	0.420724	0.295148
259.144	0.377415	0.399882	0.380805	0.303253	0.259712	0.320857	0.67064	0.641273	0.645021	0.66788	0.705803	0.680437	0.683446				0.374656	0.371031	0.291824	0.408785	0.315693
265.146	0.424579	0.381289	0.3887	0.352122	0.316018	0.283688	0.669117	0.680885	0.656675	0.679016	0.708049	0.706943	0.695252				0.377942	0.38189	0.286891	0.403454	0.341429
271.147	0.444323	0.349614	0.357891	0.299859	0.286715	0.299484	0.666453	0.687483	0.64537	0.663807	0.70919	0.727043	0.674554				0.348172	0.402059	0.298833	0.39162	0.356843
277.149	0.447628	0.352011	0.367987	0.32973	0.272654	0.283233	0.668366	0.695786	0.646519	0.69049	0.700897	0.743562	0.682197				0.352168	0.338889	0.25719	0.466848	0.310394
283.156	0.432295	0.404467	0.362341	0.32741	0.262177	0.324257	0.667924	0.699192	0.65789	0.708445	0.703114	0.725785	0.691192				0.389608	0.352371	0.317212	0.387828	0.35808
289.154	0.424549	0.396472	0.38925	0.334108	0.224616	0.362971	0.699336	0.727521	0.647207	0.71336	0.712704	0.715311	0.687981				0.390162	0.335451	0.31556	0.409656	0.37051
295.16	0.468485	0.374862	0.365215	0.346158	0.26984	0.343982	0.68992	0.709999	0.652013	0.695803	0.715819	0.741642	0.696955				0.383645	0.422026	0.343721	0.458482	0.294788
301.162	0.460545	0.369081	0.352989	0.351038	0.282186	0.33653	0.694238	0.716232	0.640269	0.722921	0.729082	0.748039	0.702501				0.40437	0.379479	0.357354	0.434341	0.300447
307.16	0.474638	0.409808	0.336235	0.35411	0.301275	0.332728	0.698742	0.720329	0.665668	0.715998	0.717784	0.773233	0.693542				0.388903	0.386812	0.349383	0.442017	0.360913
313.166	0.435066	0.457846	0.37792	0.383501	0.285278	0.339512	0.706756	0.712547	0.670049	0.696983	0.737377	0.741984	0.668135				0.396822	0.379358	0.325345	0.419443	0.366401
319.168	0.420188	0.434518	0.346529	0.331846	0.259404	0.356119	0.703005	0.718102	0.653006	0.707651	0.746019	0.760911	0.678098				0.427529	0.356581	0.31725	0.481511	0.38433
325.175	0.426588	0.398919	0.409534	0.343736	0.239005	0.334747	0.706444	0.736612	0.666325	0.716934	0.72018	0.76672	0.715615				0.431909	0.394788	0.349781	0.427652	0.399685
331.176	0.405495	0.415122	0.426656	0.378204	0.270149	0.361175	0.726998	0.732462	0.671765	0.723631	0.742247	0.765313	0.70545				0.377946	0.394185	0.335581	0.399717	0.412829
337.178	0.384964	0.404838	0.418358	0.340457	0.29424	0.362461	0.70441	0.716806	0.649533	0.705023	0.747709	0.780776	0.685844				0.401664	0.40869	0.294001	0.422879	0.355196
343.184	0.383389	0.420142	0.4243	0.375221	0.314006	0.338742	0.717667	0.742411	0.661983	0.705811	0.716982	0.786846	0.718328				0.390809	0.441708	0.319049	0.479659	0.410253
349.182	0.415286	0.403995	0.425956	0.36026	0.287183	0.335801	0.727967	0.732708	0.669822	0.725006	0.734227	0.799129	0.720493				0.425713	0.397328	0.314736	0.528296	0.372656
355.189	0.429221	0.436518	0.372676	0.395076	0.31204	0.324925	0.750765	0.707322	0.67018	0.728052	0.748367	0.76611	0.733973				0.415233	0.429073	0.3263	0.478025	0.3887
361.191	0.459403	0.471315	0.406062	0.360561	0.258394	0.352617	0.742657	0.713169	0.659727	0.719531	0.750717	0.787117	0.736228				0.408616	0.418259	0.361553	0.468185	0.381532
367.193	0.430026	0.435947	0.369081	0.409844	0.301109	0.380274	0.739003	0.747396	0.653961	0.730719	0.717885	0.802472	0.736074				0.425927	0.432115	0.328184	0.489761	0.417193
375.197	0.409225	0.44864	0.417214	0.388542	0.357062	0.35134	0.736071	0.744791	0.658183	0.737363	0.731396	0.785662	0.738565				0.458964	0.451427	0.359412	0.466332	0.446383
385.205	0.442978	0.428647	0.406311	0.411995	0.358363	0.329091	0.739446	0.74147	0.660011	0.770689	0.719997	0.809436	0.75743				0.481716	0.421351	0.361605	0.490013	0.427632
395.207	0.431682	0.417136	0.40133	0.400814	0.329246	0.375857	0.730942	0.737347	0.661168	0.758714	0.747844	0.798748	0.722993				0.448708	0.442745	0.384797	0.500691	0.438599
405.209	0.454312	0.416611	0.410235	0.391597	0.337458	0.386272	0.748751	0.745103	0.695685	0.764737	0.77072	0.797006	0.739755				0.474494	0.406262	0.342929	0.482689	0.420188
415.214	0.464944	0.464903	0.443449	0.403609	0.342418	0.388711	0.76006	0.772735	0.706912	0.77248	0.753091	0.783827	0.749757				0.487233	0.418581	0.327005	0.5207	0.434576
425.219	0.430229	0.469558	0.426987	0.385861	0.31011	0.385373	0.758138	0.770852	0.694253	0.76389	0.744634	0.80635	0.745667				0.489728	0.423798	0.375787	0.502375	0.402327
435.224	0.421298	0.481395	0.445911	0.382672	0.338266	0.386129	0.768684	0.772	0.697152	0.772359	0.769148	0.782794	0.756455				0.507465	0.43363	0.371614	0.481531	0.400434
445.228	0.451118	0.431721	0.424036	0.415623	0.372186	0.397928	0.782076	0.777693	0.69828	0.764948	0.774607	0.811886	0.748339				0.463463	0.428524	0.372833	0.509569	0.386415
455.233	0.418506	0.445743	0.477602	0.40882	0.367743	0.367818	0.784654	0.772007	0.711763	0.750754	0.774183	0.811726	0.754759				0.511967	0.432263	0.397146	0.485378	0.417879
465.241	0.411509	0.465949	0.444566	0.398882	0.310576	0.403412	0.793312	0.758606	0.723967	0.744355	0.761504	0.825972	0.748783				0.485386	0.444882	0.416076	0.482496	0.460195
475.243	0.436628	0.436334	0.442067	0.424345	0.330704	0.405868	0.787028	0.779546	0.740204	0.7705	0.776005	0.833403	0.76971				0.494112	0.412408	0.380909	0.522284	0.456553
485.248	0.374129	0.461262	0.456868	0.419239	0.350453	0.417266	0.797495	0.771816	0.740097	0.774172	0.776609	0.826142	0.782644				0.502228	0.453111	0.399497	0.541806	0.410211
495.252	0.395493	0.457832	0.413112	0.44066	0.368581	0.434061	0.793316	0.778907	0.742517	0.785247	0.763358	0.802345	0.781668				0.511598	0.437445	0.40332	0.505592	0.38842
505.257	0.461707	0.459183	0.476762	0.439138	0.412817	0.421793	0.799236	0.778565	0.728216	0.78121	0.79426	0.839137	0.77767				0.534857	0.457341	0.37827	0.533504	0.464748
515.265	0.439199	0.448753	0.439414	0.425	0.358013	0.465505	0.820445	0.789652	0.740109	0.778264	0.792073	0.843956	0.778198				0.490712	0.473033	0.40026	0.535536	0.504105
525.264	0.437906	0.465716	0.474016	0.421965	0.397866	0.461174	0.827288	0.8117	0.730292	0.786626	0.804081	0.825186	0.772891				0.450309	0.48742	0.411385	0.518403	0.44216
535.274	0.462633	0.476126	0.426818	0.425811	0.358778	0.433622	0.817221	0.76862	0.716395	0.803483	0.752775	0.821397	0.774327				0.500437	0.465698	0.362867	0.526828	0.423111
545.277	0.46987	0.44262	0.397875	0.43248	0.282133	0.46919	0.805705	0.802203	0.704306	0.793553	0.785873	0.847964	0.763154				0.481703	0.499455	0.408393	0.495073	0.438722
555.284	0.534821	0.469476	0.423373	0.413464	0.325817	0.423405	0.80622	0.780526	0.726326	0.780467	0.787714	0.850921	0.786818				0.52712	0.445459	0.385396	0.533382	0.452768
565.286	0.476331	0.466514	0.421145	0.414478	0.3651	0.435034	0.837147	0.778715	0.742945	0.809334	0.772909	0.841959	0.814547				0.517965	0.465956	0.381125	0.54183	0.4223
575.294	0.477502	0.461005	0.42609	0.443231	0.3259	0.405264	0.845189	0.798949	0.734087	0.807775	0.777799	0.815001	0.80204				0.500107	0.487848	0.382046	0.576715	0.385786
585.293	0.474783	0.457769	0.451965	0.440666	0.343241	0.432211	0.840881	0.787494	0.720966	0.82251	0.770526	0.843418	0.821539				0.540795	0.44809	0.411255	0.568331	0.435957
594.297	0.520785	0.478845	0.464338	0.469708	0.360363	0.435143	0.852474	0.776343	0.762799	0.79498	0.777785	0.840291	0.838613				0.4985	0.477872	0.381425	0.523627	0.495596
