# Supplementary material for: ESCO1 and CTCF enable formation of long chromatin loops by protecting cohesinSTAG1 from WAPL
Source: eLife. 2020 Feb 17;9:e52091. doi: 10.7554/eLife.52091 (PMC7054000; doi:10.7554/eLife.52091)
Supplement: Figure 2—figure supplement 3—source data 1. [file elife-52091-fig2-figsupp3-data1.xlsx]

## Sheet: Sheet1
time (s)	Scc1-LAP /control RNAi								Scc1-LAP /STAG2 RNAi
-20.9579	0.998046	0.980553	0.980553	0.951794	1.00607	0.964463	1.00802	0.995428	0.994149	0.964103	0.986842	1.01413	0.954789	1.03866
-15.9778	1.03137	0.987306	0.987306	1.01082	0.998379	1.05261	1.0042	0.993376	0.98924	0.945588	1.00868	1.03278	0.966935	0.950498
-10.988	0.970192	0.932378	0.932378	1.03241	1.0191	1.01127	0.962143	0.909027	1.00155	1.05294	1.03833	0.98177	1.04527	0.983146
-5.98618	0.994825	1.06936	1.06936	1.00597	1.0053	0.993558	0.99565	1.08873	1.01452	0.990112	0.977592	1.0057	1.00979	1.0392
-0.98311	1.00557	1.0304	1.0304	0.999006	0.971149	0.978099	1.02999	1.01344	1.00054	1.04726	0.988558	0.965619	1.02322	0.988495
0	0	0	0	0	0	0	0	0	0	0	0	0	0	0
4.01684	0.244861	0.328991	0.328991	0.392602	0.379572	0.257359	0.2143	0.307237	0.22109	0.227241	0.18951	0.212169	0.229815	0.125999
9.0187	0.27944	0.33623	0.33623	0.418504	0.422688	0.271179	0.258075	0.323979	0.224083	0.190504	0.221938	0.241905	0.178214	0.14625
14.0218	0.289714	0.396546	0.396546	0.465644	0.495588	0.323711	0.262268	0.395943	0.204534	0.243139	0.245495	0.257704	0.265635	0.110523
19.0236	0.375014	0.425841	0.425841	0.467493	0.486688	0.343029	0.320955	0.399715	0.283529	0.310325	0.23395	0.268723	0.331018	0.168006
24.0267	0.358415	0.404463	0.404463	0.47717	0.472234	0.346165	0.342524	0.400589	0.248727	0.174406	0.238308	0.291273	0.208942	0.189196
29.0285	0.4437	0.383073	0.383073	0.47512	0.480039	0.357355	0.349221	0.38751	0.276899	0.247575	0.294385	0.285627	0.268096	0.178981
34.0304	0.424041	0.404072	0.404072	0.460306	0.502204	0.349237	0.383028	0.412104	0.262954	0.206212	0.283919	0.331293	0.234125	0.159355
39.0335	0.446753	0.561975	0.561975	0.537615	0.515946	0.356947	0.364912	0.551828	0.273682	0.329908	0.253924	0.26116	0.333255	0.19515
44.0353	0.435883	0.578274	0.578274	0.461718	0.524731	0.384113	0.3916	0.580845	0.276539	0.315692	0.321528	0.346869	0.310244	0.196299
49.0263	0.477695	0.574045	0.574045	0.531718	0.539787	0.405656	0.396149	0.527777	0.242167	0.306665	0.295384	0.306254	0.295042	0.190287
54.0282	0.48741	0.516446	0.516446	0.521904	0.612148	0.402995	0.364154	0.517548	0.298509	0.284607	0.298888	0.351464	0.263367	0.204349
59.0312	0.501122	0.530323	0.530323	0.505906	0.591133	0.425103	0.386345	0.510076	0.317021	0.29048	0.28082	0.359052	0.320684	0.199738
64.0331	0.504113	0.625189	0.625189	0.565199	0.600246	0.412331	0.394644	0.612032	0.323153	0.296617	0.320388	0.368773	0.324017	0.22352
69.0349	0.490447	0.57626	0.57626	0.525129	0.580928	0.466673	0.426156	0.606577	0.283216	0.333267	0.307424	0.342412	0.303864	0.181526
74.038	0.475629	0.542511	0.542511	0.533799	0.587322	0.451747	0.422611	0.552284	0.351115	0.295706	0.336541	0.364647	0.303454	0.261078
79.0399	0.516307	0.56842	0.56842	0.590919	0.685113	0.465376	0.440951	0.599407	0.340632	0.300799	0.302827	0.387023	0.306005	0.244308
84.0309	0.478071	0.602686	0.602686	0.575374	0.620219	0.473944	0.42817	0.54218	0.283875	0.31664	0.356643	0.346705	0.360633	0.219053
89.0327	0.521204	0.547808	0.547808	0.598066	0.642834	0.490507	0.42415	0.548404	0.352809	0.350581	0.325129	0.362172	0.326018	0.267318
94.0358	0.526522	0.485442	0.485442	0.544132	0.592307	0.457984	0.485238	0.482136	0.365376	0.340243	0.355877	0.372111	0.335466	0.266531
99.0376	0.54871	0.540764	0.540764	0.605743	0.608966	0.487199	0.438324	0.543171	0.343975	0.336862	0.360348	0.395791	0.363936	0.274395
104.04	0.555009	0.540299	0.540299	0.589867	0.651093	0.501001	0.457035	0.532622	0.334705	0.315137	0.327249	0.397952	0.357381	0.26635
109.043	0.594348	0.648578	0.648578	0.629672	0.628163	0.471609	0.475158	0.625	0.376495	0.370915	0.401759	0.387622	0.372311	0.305632
114.044	0.513561	0.651947	0.651947	0.598343	0.678972	0.466943	0.427824	0.649722	0.351716	0.428531	0.334387	0.411165	0.422899	0.253907
119.035	0.529911	0.570605	0.570605	0.614951	0.59164	0.526733	0.459301	0.550193	0.307835	0.452229	0.404773	0.453176	0.468613	0.247524
126.551	0.558209	0.607141	0.607141	0.676908	0.650992	0.512048	0.510579	0.611336	0.359487	0.392755	0.36619	0.431938	0.402691	0.265311
136.543	0.511895	0.614066	0.614066	0.663488	0.616574	0.535055	0.493213	0.604061	0.389207	0.425962	0.368677	0.424643	0.418015	0.315464
146.548	0.583754	0.660803	0.660803	0.665146	0.628739	0.518056	0.495842	0.638609	0.400034	0.416244	0.371325	0.438258	0.450896	0.29996
156.553	0.562492	0.686482	0.686482	0.64936	0.650764	0.568399	0.516682	0.693695	0.400553	0.456349	0.411468	0.430756	0.456945	0.299638
166.558	0.551191	0.635164	0.635164	0.637444	0.705336	0.564778	0.543352	0.637313	0.406582	0.440631	0.40436	0.461705	0.43306	0.341496
176.55	0.594116	0.692789	0.692789	0.629624	0.741526	0.543407	0.552581	0.682711	0.388067	0.432338	0.422989	0.475234	0.421412	0.306424
186.555	0.591375	0.658843	0.658843	0.579871	0.784514	0.550071	0.575618	0.632899	0.423655	0.418601	0.430067	0.435054	0.429454	0.347357
196.56	0.569515	0.701625	0.701625	0.690434	0.765793	0.543996	0.579059	0.708727	0.404716	0.467572	0.438441	0.480988	0.440667	0.32125
206.558	0.603707	0.734249	0.734249	0.657461	0.766923	0.559366	0.578814	0.746211	0.411146	0.495722	0.414558	0.454085	0.470824	0.325757
216.557	0.609115	0.677135	0.677135	0.656036	0.774334	0.584066	0.560943	0.69145	0.444899	0.527415	0.439442	0.505566	0.526462	0.352117
226.562	0.6417	0.651893	0.651893	0.676487	0.774586	0.550454	0.600123	0.658588	0.430424	0.447349	0.480846	0.490716	0.445562	0.35026
236.567	0.674442	0.670054	0.670054	0.69615	0.740043	0.561478	0.596377	0.666879	0.46031	0.548481	0.449284	0.518224	0.548807	0.340957
251.565	0.653727	0.680897	0.680897	0.724517	0.788745	0.589727	0.632811	0.701506	0.434428	0.528522	0.480375	0.518954	0.523127	0.341461
271.571	0.665682	0.681484	0.681484	0.68686	0.789337	0.593726	0.654126	0.699495	0.476551	0.586179	0.50097	0.495524	0.568148	0.375496
291.578	0.664774	0.710189	0.710189	0.677143	0.766679	0.619629	0.643357	0.709594	0.487044	0.602203	0.485718	0.492392	0.600745	0.379704
311.578	0.726191	0.725791	0.725791	0.716265	0.774134	0.636406	0.670427	0.730308	0.487805	0.598307	0.539145	0.527956	0.590383	0.38906
331.585	0.713764	0.757929	0.757929	0.731848	0.80689	0.64272	0.675795	0.734468	0.503101	0.577513	0.52612	0.526227	0.579421	0.402056
351.585	0.647739	0.730233	0.730233	0.738467	0.757847	0.653282	0.689585	0.745965	0.498091	0.625599	0.527402	0.526635	0.623167	0.400649
371.592	0.704343	0.715718	0.715718	0.73964	0.786604	0.672375	0.680788	0.734809	0.503434	0.615727	0.574165	0.512413	0.625705	0.396746
391.592	0.670103	0.732088	0.732088	0.730797	0.826907	0.651645	0.710423	0.709703	0.512626	0.610176	0.55598	0.546846	0.615318	0.406415
411.598	0.702961	0.757292	0.757292	0.813307	0.797433	0.672648	0.718578	0.757808	0.505156	0.596641	0.585305	0.529747	0.587178	0.41087
431.602	0.679425	0.784746	0.784746	0.759317	0.819155	0.687549	0.706311	0.766193	0.553421	0.656533	0.582685	0.55374	0.650303	0.450369
451.608	0.658634	0.788315	0.788315	0.751621	0.803372	0.68091	0.742921	0.766344	0.541947	0.649154	0.579308	0.550144	0.643661	0.430475
471.606	0.658903	0.782908	0.782908	0.784314	0.79538	0.714109	0.733754	0.775836	0.547176	0.663802	0.610328	0.55128	0.66433	0.45171
496.616	0.693608	0.76727	0.76727	0.792586	0.820443	0.73302	0.761209	0.77339	0.562601	0.675842	0.617962	0.531107	0.694202	0.45869
526.62	0.716426	0.776199	0.776199	0.778501	0.837122	0.73849	0.74023	0.75758	0.555048	0.65408	0.642623	0.545641	0.670835	0.439078
556.624	0.728313	0.731369	0.731369	0.798721	0.811509	0.745164	0.750795	0.756842	0.569181	0.696245	0.642072	0.568589	0.697428	0.459946
586.634	0.737749	0.763408	0.763408	0.790721	0.826378	0.748952	0.744574	0.751196	0.57906	0.690536	0.642414	0.556594	0.684098	0.472052
611.636	0.747133	0.760362	0.760362	0.782521	0.856787		0.739776	0.745696	0.593947	0.722029	0.690877	0.578549	0.695248	0.478021
