# Supplementary material for: ESCO1 and CTCF enable formation of long chromatin loops by protecting cohesinSTAG1 from WAPL
Source: eLife. 2020 Feb 17;9:e52091. doi: 10.7554/eLife.52091 (PMC7054000; doi:10.7554/eLife.52091)
Supplement: Figure 2—figure supplement 3—source data 2. [file elife-52091-fig2-figsupp3-data2.xlsx]

## Sheet: Sheet1
time (s)	Smc1-LAP/CONTROL RNAi															Smc1-LAP/STAG2 RNAi
-20.9579	0.959569	1.03022	0.945468	1.02598	1.00507	0.983263	1.02494	1.00978	1.01157	0.960522	1.0179	0.992299	1.01044	0.986572	0.947712	1.03337	1.05156	0.994657	0.976089	1.01647	1.03699	1.00639	0.962815	0.968119	1.03147	1.00944	1.0273	1.0414	1.0414
-15.9778	1.03829	0.991068	1.03245	0.988436	1.00367	1.02595	1.00026	0.97755	0.982523	1.02466	1.0338	1.01702	1.03593	1.02868	0.987292	1.00613	0.993258	0.952431	1.05198	0.968408	1.01252	1.03192	0.978715	1.00462	1.04083	0.98052	0.98646	0.97259	0.97259
-10.988	1.02327	0.973126	1.02824	1.0002	0.980827	1.00015	1.00175	1.00387	1.01052	1.04102	1.00062	0.988133	0.98666	0.970388	1.03007	0.999606	1.01652	1.01783	0.983894	1.01212	1.01843	0.99538	0.985266	1.03487	0.94139	1.01215	0.99893	1.01685	1.01685
-5.98618	0.994124	1.00379	1.00225	0.999989	1.00838	1.00658	1.00757	0.983511	1.01914	0.979503	0.938688	1.04118	0.980999	0.998721	1.00606	0.998393	0.99037	0.995305	0.981482	1.02494	0.981475	1.02342	1.02347	0.99387	1.02332	1.04769	1.03688	0.951325	0.951325
-0.98311	0.984755	1.00179	0.991595	0.985389	1.00206	0.984058	0.965487	1.02529	0.976254	0.99429	1.00899	0.961368	0.985964	1.01564	1.02887	0.962502	0.948301	1.03977	1.00655	0.978059	0.950589	0.942887	1.04974	0.998522	0.962994	0.950193	0.950426	1.01784	1.01784
0	0	0	0	0	0	0	0	0	0	0	0	0	0	0	0	0	0	0	0	0	0	0	0	0	0	0	0	0	0
4.01684	0.309534	0.240891	0.315746	0.282571	0.269852	0.251678	0.22986	0.259982	0.220349	0.237494	0.25066	0.40907	0.380826	0.440221	0.427897	0.292117	0.323586	0.178991	0.180074	0.168895	0.22306	0.303387	0.202814	0.171685	0.110854	0.159389	0.158649	0.193548	0.193548
9.0187	0.306909	0.299502	0.314636	0.383679	0.337426	0.266415	0.279074	0.30039	0.2726	0.315894	0.335319	0.517457	0.439135	0.476378	0.515886	0.287914	0.283243	0.192364	0.214832	0.216445	0.256125	0.365342	0.243728	0.204068	0.156109	0.262953	0.236725	0.211173	0.211173
14.0218	0.350253	0.352689	0.354924	0.359482	0.345827	0.299955	0.285398	0.336259	0.301447	0.370961	0.403619	0.549299	0.438395	0.498439	0.543227	0.300764	0.294041	0.244793	0.222251	0.254619	0.275392	0.405001	0.247266	0.261598	0.184484	0.314993	0.332038	0.241483	0.241483
19.0236	0.37984	0.32429	0.384994	0.399093	0.368457	0.296291	0.313007	0.397393	0.31245	0.41722	0.369332	0.488858	0.455841	0.52979	0.551751	0.291049	0.292752	0.276129	0.231537	0.2194	0.306182	0.347834	0.259085	0.255368	0.139272	0.265459	0.269969	0.289954	0.289954
24.0267	0.412216	0.368535	0.41677	0.389135	0.414083	0.351884	0.334724	0.408002	0.354934	0.408669	0.453426	0.578538	0.438608	0.541033	0.56007	0.249638	0.221189	0.266289	0.257055	0.23599	0.259168	0.399804	0.271963	0.238647	0.207623	0.286683	0.285529	0.283686	0.283686
29.0285	0.408691	0.365654	0.431366	0.449822	0.374627	0.388953	0.377053	0.36061	0.383764	0.416069	0.404935	0.566487	0.462541	0.495691	0.555571	0.24233	0.272078	0.279711	0.256874	0.216753	0.29938	0.384246	0.312805	0.279548	0.206089	0.312533	0.306898	0.266204	0.266204
34.0304	0.40137	0.354412	0.411487	0.449238	0.378016	0.384685	0.397279	0.408194	0.397655	0.397934	0.432834	0.523409	0.497533	0.535442	0.596223	0.329766	0.315723	0.33281	0.257042	0.236409	0.298939	0.402855	0.304192	0.246068	0.191166	0.283537	0.276456	0.251707	0.251707
39.0335	0.411143	0.376554	0.4316	0.477336	0.396322	0.420692	0.380499	0.395523	0.379137	0.423813	0.458687	0.58156	0.489847	0.543204	0.600055	0.278799	0.252871	0.2389	0.296751	0.244737	0.293716	0.447026	0.250704	0.258625	0.239671	0.336769	0.343082	0.237066	0.237066
44.0353	0.469345	0.350448	0.492054	0.44754	0.373623	0.36116	0.352104	0.408983	0.349181	0.47642	0.437104	0.504158	0.500638	0.597818	0.571178	0.276545	0.273128	0.334069	0.24454	0.257155	0.278565	0.413991	0.310084	0.252291	0.208633	0.301212	0.299131	0.269791	0.269791
49.0263	0.466135	0.377064	0.524038	0.5496	0.409336	0.426251	0.428644	0.415708	0.437728	0.441133	0.420503	0.568646	0.519087	0.553639	0.625107	0.281278	0.285905	0.295895	0.289123	0.241758	0.282666	0.495437	0.294113	0.277669	0.227302	0.256303	0.248934	0.310477	0.310477
54.0282	0.471667	0.408392	0.512452	0.481919	0.435483	0.385732	0.429099	0.421767	0.43331	0.445369	0.432402	0.561353	0.510875	0.585939	0.60298	0.281195	0.287133	0.312958	0.290295	0.238496	0.314789	0.457265	0.304397	0.289537	0.249844	0.300657	0.294194	0.286522	0.286522
59.0312	0.518538	0.381943	0.5541	0.54342	0.408241	0.428848	0.402851	0.403425	0.414424	0.40007	0.496637	0.508223	0.490726	0.572455	0.653887	0.299069	0.289935	0.308091	0.323846	0.248577	0.321277	0.461657	0.320417	0.288026	0.254578	0.315331	0.319092	0.27691	0.27691
64.0331	0.505491	0.387715	0.539821	0.506338	0.411455	0.389954	0.430502	0.441753	0.447377	0.466279	0.460706	0.582574	0.53367	0.572792	0.654866	0.271884	0.283289	0.260335	0.31294	0.276905	0.317308	0.451654	0.333549	0.273652	0.294938	0.324125	0.317492	0.256511	0.256511
69.0349	0.499229	0.410175	0.541383	0.496181	0.434085	0.380974	0.437704	0.443063	0.401738	0.476764	0.452332	0.541926	0.571055	0.593409	0.620691	0.234526	0.246273	0.290916	0.289775	0.304914	0.323222	0.471932	0.299534	0.257742	0.22682	0.351925	0.352092	0.313988	0.313988
74.038	0.489118	0.43958	0.536872	0.501917	0.481214	0.469607	0.485656	0.421927	0.509615	0.49472	0.49229	0.608588	0.57517	0.614523	0.642739	0.298359	0.273599	0.303522	0.348182	0.267624	0.319367	0.536141	0.319255	0.299476	0.270767	0.294631	0.293521	0.303082	0.303082
79.0399	0.516142	0.446944	0.551808	0.534396	0.481338	0.429689	0.472611	0.47408	0.46713	0.48965	0.514143	0.535871	0.570594	0.634124	0.651847	0.3371	0.326932	0.299886	0.327237	0.298631	0.318503	0.557243	0.32842	0.298126	0.272486	0.246691	0.242137	0.247621	0.247621
84.0309	0.512402	0.459271	0.564411	0.589723	0.478378	0.416383	0.413051	0.488863	0.414455	0.538314	0.510876	0.607879	0.567785	0.621294	0.602897	0.280377	0.307526	0.290672	0.301429	0.286026	0.34328	0.52491	0.353233	0.309249	0.285191	0.287066	0.30213	0.303483	0.303483
89.0327	0.559292	0.471282	0.587705	0.492991	0.499897	0.403422	0.3858	0.404908	0.40125	0.434949	0.53229	0.607895	0.636557	0.677189	0.619179	0.323738	0.319132	0.278565	0.29877	0.306002	0.321704	0.559941	0.407212	0.283085	0.280124	0.311966	0.300173	0.333783	0.333783
94.0358	0.53576	0.490829	0.569036	0.571444	0.507734	0.443497	0.488929	0.433933	0.485037	0.495888	0.516262	0.57226	0.577861	0.697386	0.648931	0.264192	0.30157	0.289698	0.317009	0.320895	0.362057	0.541724	0.34729	0.298492	0.260678	0.285154	0.299555	0.279647	0.279647
99.0376	0.520182	0.467708	0.560149	0.562958	0.48606	0.420898	0.458968	0.426539	0.477203	0.442276	0.558043	0.582399	0.58319	0.663206	0.646419	0.294279	0.329374	0.333742	0.373496	0.299873	0.338467	0.576688	0.45009	0.287632	0.23261	0.340558	0.346641	0.311354	0.311354
104.04	0.514933	0.441711	0.554688	0.563245	0.447641	0.53256	0.505988	0.454321	0.487375	0.444358	0.536779	0.606531	0.617034	0.641662	0.687709	0.296248	0.334253	0.344965	0.377644	0.319528	0.333128	0.56611	0.360806	0.312877	0.291545	0.300857	0.306859	0.293708	0.293708
109.043	0.564473	0.468378	0.588261	0.519856	0.49555	0.499985	0.515769	0.427338	0.514136	0.532454	0.52224	0.664829	0.601522	0.714931	0.591718	0.318129	0.331046	0.370173	0.333976	0.33183	0.32507	0.569965	0.431077	0.295925	0.304829	0.314544	0.319977	0.289403	0.289403
114.044	0.590006	0.481155	0.60944	0.629368	0.516509	0.467155	0.490166	0.481324	0.493382	0.560919	0.586919	0.60947	0.594837	0.734982	0.652751	0.348817	0.330984	0.318183	0.397407	0.312403	0.375917	0.557586	0.449077	0.288474	0.268433	0.318577	0.311872	0.315885	0.315885
119.035	0.569488	0.444383	0.603074	0.609498	0.515922	0.50876	0.51381	0.486148	0.525763	0.531208	0.606925	0.628588	0.634891	0.647435	0.59822	0.31032	0.334371	0.39376	0.370257	0.343472	0.359483	0.622904	0.435534	0.325781	0.2922	0.291342	0.295257	0.260002	0.260002
126.551	0.572495	0.480994	0.600947	0.593209	0.526831	0.533521	0.506452	0.493469	0.505268	0.563084	0.562991	0.617726	0.647451	0.752196	0.657338	0.274562	0.289494	0.373092	0.358963	0.306903	0.396562	0.602571	0.393894	0.327035	0.286455	0.320544	0.32211	0.285651	0.285651
136.543	0.584316	0.500953	0.612821	0.58676	0.52244	0.448774	0.518577	0.506029	0.520601	0.557228	0.570898	0.584859	0.600949	0.749515	0.649302	0.330717	0.325222	0.335861	0.331262	0.377928	0.38218	0.606791	0.401589	0.343435	0.295462	0.314222	0.316458	0.275961	0.275961
146.548	0.618536	0.498716	0.635518	0.603445	0.537333	0.53455	0.488167	0.519668	0.491471	0.506137	0.559775	0.630419	0.675373	0.706768	0.665625	0.285065	0.294188	0.352763	0.356223	0.395038	0.386687	0.630195	0.443348	0.362788	0.302597	0.302768	0.305179	0.316696	0.316696
156.553	0.631052	0.529715	0.644903	0.631481	0.560102	0.53186	0.515059	0.533825	0.534044	0.598568	0.58229	0.625047	0.667845	0.757237	0.630408	0.319829	0.331018	0.372254	0.418485	0.356164	0.396847	0.631304	0.399245	0.348976	0.315796	0.321292	0.333347	0.34245	0.34245
166.558	0.655114	0.529178	0.672601	0.667423	0.559296	0.530694	0.526637	0.508658	0.551575	0.587625	0.559504	0.620031	0.684628	0.697226	0.63202	0.293433	0.310033	0.397616	0.401198	0.345922	0.356274	0.640706	0.451764	0.361966	0.350636	0.343569	0.350705	0.305787	0.305787
176.55	0.674342	0.524629	0.684675	0.658663	0.552493	0.559052	0.572656	0.521811	0.60147	0.551282	0.610841	0.68203	0.670167	0.724569	0.675448	0.331677	0.330734	0.366058	0.384529	0.325132	0.427479	0.647741	0.443609	0.390041	0.337451	0.375875	0.393259	0.324408	0.324408
186.555	0.668881	0.548833	0.691528	0.662178	0.560646	0.549314	0.528282	0.574809	0.545546	0.615097	0.599034	0.706286	0.684899	0.72216	0.677296	0.367556	0.383155	0.408544	0.415122	0.353139	0.43283	0.642548	0.446046	0.368113	0.318096	0.37504	0.385802	0.30631	0.30631
196.56	0.644933	0.569506	0.668256	0.633846	0.619899	0.592181	0.537887	0.564746	0.537728	0.61592	0.592941	0.687711	0.6904	0.759841	0.642078	0.348635	0.325229	0.409824	0.425844	0.348596	0.400333	0.661209	0.470166	0.365448	0.338505	0.382589	0.398837	0.318589	0.318589
206.558	0.68664	0.559124	0.689649	0.660156	0.600095	0.536618	0.541321	0.571095	0.560868	0.591013	0.631565	0.662031	0.715865	0.749085	0.661715	0.341805	0.343515	0.385839	0.44549	0.394902	0.440811	0.66172	0.445338	0.384163	0.272597	0.410716	0.431927	0.301103	0.301103
216.557	0.700242	0.586184	0.70397	0.685591	0.612523	0.548417	0.609298	0.606946	0.595285	0.617072	0.639818	0.686801	0.733749	0.789994	0.665492	0.340997	0.36163	0.428687	0.438247	0.424763	0.431092	0.666352	0.49419	0.404143	0.329793	0.405937	0.413846	0.306153	0.306153
226.562	0.715035	0.548282	0.714988	0.658392	0.585307	0.575711	0.560044	0.598702	0.587077	0.636103	0.62658	0.691711	0.764858	0.774504	0.664727	0.329584	0.34932	0.412367	0.431353	0.43981	0.400963	0.664859	0.521295	0.392536	0.298315	0.383112	0.399349	0.30094	0.30094
236.567	0.699959	0.600811	0.708584	0.697317	0.638391	0.57408	0.534541	0.605846	0.520323	0.676855	0.651728	0.679291	0.718302	0.760255	0.671687	0.349701	0.342253	0.470822	0.450725	0.418909	0.394561	0.726619	0.498932	0.399727	0.374901	0.389698	0.421226	0.299818	0.299818
251.565	0.728883	0.609372	0.730109	0.638813	0.653876	0.598831	0.584214	0.614286	0.573795	0.618904	0.642576	0.687722	0.722248	0.773609	0.67625	0.310514	0.32617	0.455545	0.473643	0.418263	0.446956	0.751471	0.493134	0.424877	0.36638	0.424748	0.44796	0.317199	0.317199
271.571	0.715728	0.597199	0.720314	0.669299	0.633592	0.629405	0.656964	0.642101	0.655317	0.693407	0.695786	0.695072	0.718668	0.82229	0.701109	0.323419	0.338979	0.471415	0.48371	0.421584	0.449097	0.733145	0.523235	0.407044	0.365094	0.378166	0.400776	0.302341	0.302341
291.578	0.71499	0.590514	0.723292	0.645074	0.624441	0.613805	0.612475	0.652923	0.609317	0.676961	0.697388	0.702476	0.747906	0.800606	0.686957	0.348912	0.365733	0.483741	0.484138	0.456491	0.475598	0.727525	0.539881	0.44217	0.409141	0.381513	0.422571	0.325789	0.325789
311.578	0.749312	0.583656	0.748659	0.71392	0.6406	0.592448	0.660634	0.668552	0.665181	0.698584	0.684171	0.70527	0.781691	0.837361	0.70095	0.335299	0.371057	0.552256	0.527698	0.466861	0.506937	0.748423	0.554953	0.43901	0.401962	0.440177	0.482701	0.328515	0.328515
331.585	0.764156	0.589957	0.760826	0.730681	0.63962	0.636272	0.665521	0.642939	0.667478	0.686813	0.718628	0.702649	0.784369	0.79849	0.731401	0.36374	0.37835	0.560115	0.546621	0.506713	0.490266	0.763208	0.552008	0.453416	0.439594	0.448645	0.494695	0.327141	0.327141
351.585	0.786102	0.600349	0.782528	0.727807	0.645414	0.637539	0.656098	0.681198	0.678031	0.672638	0.754515	0.722581	0.764229	0.825612	0.716654	0.383364	0.403135	0.611568	0.516316	0.483722	0.526752	0.743701	0.575868	0.46457	0.43201	0.464172	0.490068	0.324192	0.324192
371.592	0.783296	0.601303	0.772931	0.740886	0.665061	0.673831	0.69554	0.667397	0.695328	0.686748	0.713694	0.741369	0.78763	0.834024	0.729908	0.354061	0.356655	0.56787	0.528885	0.494002	0.517623	0.758003	0.597881	0.4763	0.466508	0.470413	0.504223	0.344844	0.344844
391.592	0.797914	0.614957	0.794361	0.782664	0.673872	0.630021	0.731488	0.706827	0.722846	0.768834	0.776012	0.735731	0.827848	0.841962	0.713166	0.401899	0.409114	0.612685	0.560856	0.476075	0.521102	0.773609	0.570881	0.478865	0.465745	0.456095	0.496438	0.331679	0.331679
411.598	0.813847	0.626012	0.797865	0.776152	0.705978	0.677598	0.754096	0.684923	0.733095	0.697217	0.786392	0.729979	0.801136	0.869469	0.750008	0.383171	0.394623	0.646872	0.561596	0.488992	0.52087	0.793108	0.5994	0.487997	0.463038	0.474479	0.506426	0.335803	0.335803
431.602	0.832227	0.61429	0.822509	0.762505	0.685192	0.675977	0.732742	0.706285	0.717988	0.735622	0.771056	0.745375	0.802073	0.822785	0.709237	0.413867	0.410229	0.647091	0.567102	0.52697	0.551769	0.796452	0.606758	0.491948	0.491148	0.468206	0.491236	0.334855	0.334855
451.608	0.833633	0.607113	0.827211	0.777	0.697486	0.666189	0.754915	0.689837	0.762523	0.711536	0.75281	0.730088	0.81386	0.856431	0.738645	0.420095	0.421521	0.650062	0.557762	0.521962	0.586588	0.787839	0.607568	0.498887	0.453169	0.498265	0.533332	0.332558	0.332558
471.606	0.808998	0.618978	0.806951	0.791195	0.712395	0.664429	0.726544	0.731478	0.729709	0.752948	0.793185	0.730149	0.79879	0.876317	0.727875	0.431657	0.421028	0.671426	0.548635	0.507107	0.568207	0.793523	0.625163	0.519211	0.478472	0.455592	0.47118	0.348488	0.348488
496.616	0.828252	0.632994	0.82541	0.788639	0.735079	0.682252	0.764764	0.741572	0.775804	0.752734	0.812737	0.756437	0.822703	0.880839	0.730961	0.443857	0.436963	0.68869	0.568209	0.556227	0.558825	0.832896	0.630879	0.51753	0.498407	0.494678	0.510206	0.359716	0.359716
526.62	0.827426	0.637968	0.818131	0.805881	0.740794	0.709204	0.763797	0.752496	0.786313	0.76946	0.811557	0.765898	0.836611	0.889842	0.695426	0.434056	0.442526	0.739395	0.602715	0.561449	0.544173	0.823442	0.671126	0.556346	0.503936	0.539018	0.551527	0.354175	0.354175
556.624	0.822656	0.635296	0.81631	0.840411	0.746109	0.713667	0.765596	0.77755	0.76985	0.766591	0.818016	0.773353	0.852815	0.888523	0.725452	0.460981	0.470408	0.764305	0.573344	0.581864	0.569441	0.838967	0.641978	0.546993	0.487973	0.586755	0.605692	0.39771	0.39771
586.634	0.852115	0.637955	0.844282	0.831812	0.737071	0.697725	0.736503	0.782742	0.761053	0.816586	0.855479	0.7846	0.861177	0.923042	0.756876	0.484711	0.479208	0.791935	0.578982	0.582025	0.537869	0.854779	0.663254	0.56744	0.537939	0.57833	0.58601	0.382121	0.382121
611.636	0.874111	0.639262	0.861225	0.858428	0.762259	0.678677	0.743974	0.781814	0.747877	0.832852	0.8492	0.819162	0.878127	0.925982	0.744793	0.528395	0.526568	0.798551	0.622857	0.591868	0.597444	0.850148	0.643155	0.57795	0.530576	0.619044	0.629538	0.399603	0.399603
