# Supplementary material for: ESCO1 and CTCF enable formation of long chromatin loops by protecting cohesinSTAG1 from WAPL
Source: eLife. 2020 Feb 17;9:e52091. doi: 10.7554/eLife.52091 (PMC7054000; doi:10.7554/eLife.52091)
Supplement: Figure 2—source data 1. [file elife-52091-fig2-data1.xlsx]

## Sheet: Sheet1
time (min)	control RNAi															STAG1 RNAi															STAG2 RNAi															WAPL RNAi
0	1	1	1	1	1	1	1	1	1	1	1	1	1	1	1	1	1	1	1	1	1	1	1	1	1	1	1	1	1	1	1	1	1	1	1	1	1	1	1	1	1	1	1	1	1	1	1	1	1
1	0.874938	0.872101	0.907149	0.79545	0.897198	0.878372	0.898808	0.862806	0.903073	0.897602	0.915525	0.855396	0.860465	0.861386	0.823056	0.917684	0.895438	0.79696	0.890555	0.923602	0.921801	0.883184	0.839871	0.829225	0.884974	0.8375	0.900841	0.922828	0.928778	0.916793	0.889986	0.924937	0.918013	0.924874	0.930736	0.89951	0.948342	0.923576	0.906754	0.91467	0.957214	0.828022	0.894546	0.932233	0.917557	0.973203	0.938495	0.955325	0.950119
2	0.749875	0.744202	0.814298	0.590899	0.794396	0.756743	0.797616	0.725613	0.806147	0.795204	0.83105	0.710792	0.72093	0.722771	0.646111	0.835368	0.790876	0.59392	0.781109	0.847203	0.843602	0.766367	0.679741	0.65845	0.769947	0.675	0.801681	0.845656	0.857556	0.833585	0.779971	0.849875	0.836027	0.849748	0.861472	0.799019	0.896683	0.847152	0.813508	0.82934	0.914429	0.656043	0.789093	0.864466	0.835114	0.946405	0.87699	0.91065	0.900237
3	0.647549	0.636559	0.726988	0.473031	0.691984	0.670322	0.709489	0.596958	0.706997	0.705277	0.767104	0.597557	0.605074	0.663887	0.509532	0.753052	0.686315	0.39088	0.671664	0.770805	0.765404	0.649551	0.519612	0.487676	0.654921	0.5125	0.702522	0.768484	0.786334	0.750378	0.669957	0.774812	0.75404	0.774622	0.792208	0.698529	0.845025	0.770729	0.720263	0.74401	0.871643	0.484065	0.683639	0.796699	0.752672	0.919608	0.815484	0.865975	0.850356
4	0.587448	0.566536	0.649249	0.504887	0.590248	0.644713	0.643928	0.485381	0.603048	0.640293	0.744215	0.547061	0.536576	0.764462	0.453685	0.691915	0.610422	0.266959	0.599995	0.681178	0.688047	0.574955	0.405796	0.391441	0.578085	0.428885	0.615231	0.684411	0.727499	0.693898	0.613119	0.729596	0.687022	0.721098	0.743035	0.629448	0.793	0.741913	0.66769	0.682231	0.804705	0.404072	0.628384	0.740584	0.707657	0.880788	0.768113	0.825646	0.815375
5	0.527346	0.496512	0.571509	0.536742	0.488511	0.619104	0.578367	0.373804	0.499099	0.575308	0.721325	0.496566	0.468078	0.865038	0.397838	0.644895	0.552351	0.188843	0.550197	0.58333	0.611213	0.524803	0.318794	0.338361	0.523359	0.394307	0.535318	0.596343	0.676364	0.654033	0.589338	0.702932	0.628669	0.68008	0.706351	0.579891	0.740764	0.74066	0.638664	0.633132	0.722753	0.38126	0.604333	0.691711	0.685908	0.836396	0.727809	0.787331	0.787845
6	0.477461	0.455567	0.514106	0.510962	0.490007	0.556784	0.545059	0.345155	0.447198	0.536975	0.66913	0.439498	0.397901	0.78802	0.457945	0.597876	0.494281	0.110727	0.500399	0.485481	0.534379	0.474651	0.231792	0.285281	0.468633	0.359729	0.455404	0.508274	0.625229	0.614168	0.565556	0.676269	0.570316	0.639062	0.669668	0.530335	0.688527	0.739407	0.609638	0.584034	0.640801	0.358448	0.580281	0.642839	0.66416	0.792005	0.687504	0.749016	0.760315
7	0.432311	0.430278	0.468478	0.449353	0.555675	0.469989	0.531801	0.357971	0.421321	0.511968	0.603355	0.379143	0.326885	0.622204	0.571786	0.552618	0.438043	0.046885	0.458893	0.395915	0.470757	0.429554	0.174504	0.242	0.422037	0.318324	0.377976	0.43207	0.559295	0.565684	0.533061	0.649966	0.509401	0.600183	0.634038	0.480102	0.647388	0.733117	0.585219	0.534811	0.573468	0.328253	0.557166	0.600579	0.635261	0.759291	0.646052	0.717912	0.733513
8	0.387162	0.40499	0.422849	0.387744	0.621343	0.383194	0.518543	0.370786	0.395444	0.48696	0.538899	0.31956	0.257106	0.456389	0.682523	0.514407	0.388432	0.034648	0.447365	0.33948	0.450541	0.401067	0.214849	0.230914	0.402151	0.258145	0.30738	0.388493	0.448967	0.491343	0.465713	0.625104	0.438236	0.569856	0.602621	0.427647	0.639539	0.711716	0.574618	0.485214	0.549992	0.275913	0.537127	0.578159	0.582868	0.746749	0.60247	0.7002	0.708064
9	0.373835	0.398971	0.402231	0.362476	0.521365	0.387217	0.475843	0.381747	0.321815	0.465951	0.552277	0.305461	0.260386	0.369452	0.610108	0.476195	0.338822	0.022411	0.435838	0.283045	0.430325	0.37258	0.255195	0.219828	0.382265	0.197966	0.236785	0.344916	0.338638	0.417002	0.398365	0.600242	0.367071	0.539528	0.571204	0.375193	0.63169	0.690314	0.564017	0.435618	0.526515	0.223574	0.517087	0.555739	0.530475	0.734207	0.558887	0.682487	0.682614
10	0.361047	0.393616	0.382037	0.337824	0.418579	0.394373	0.431594	0.392708	0.248187	0.444941	0.565655	0.291363	0.263666	0.282516	0.537693	0.437984	0.289212	0.010174	0.424311	0.226609	0.410109	0.344092	0.29554	0.208743	0.362379	0.137788	0.16619	0.301339	0.22831	0.342661	0.331017	0.57538	0.295906	0.509201	0.539788	0.322738	0.623842	0.668913	0.553416	0.386021	0.503038	0.171234	0.497048	0.533318	0.478081	0.721431	0.517005	0.664495	0.657571
11	0.353419	0.388476	0.367664	0.312345	0.326858	0.378355	0.392261	0.378315	0.209304	0.424918	0.563609	0.282389	0.291967	0.244455	0.484886	0.421583	0.255237	-0.01711	0.420291	0.25072	0.398648	0.328153	0.245938	0.1796	0.33497	0.109092	0.161807	0.278997	0.26495	0.33862	0.310102	0.555186	0.30327	0.467858	0.521535	0.300442	0.597777	0.666461	0.502804	0.393068	0.471292	0.137011	0.481309	0.523019	0.459407	0.704209	0.507432	0.641188	0.640245
12	0.356927	0.383838	0.365852	0.285212	0.259013	0.312333	0.363536	0.316836	0.234947	0.406727	0.532916	0.282935	0.366738	0.297165	0.465947	0.41182	0.225586	-0.04855	0.418348	0.294968	0.388733	0.314429	0.182498	0.147271	0.306233	0.08524	0.16761	0.259921	0.324202	0.345394	0.300796	0.536159	0.330266	0.423761	0.506573	0.283469	0.568497	0.667352	0.445132	0.410111	0.438087	0.105985	0.466329	0.514859	0.446683	0.686986	0.497858	0.617882	0.62292
13	0.360435	0.3792	0.36404	0.258079	0.191168	0.246311	0.334811	0.255358	0.260591	0.388535	0.502223	0.28348	0.441508	0.349875	0.447009	0.402058	0.195935	-0.08	0.416404	0.339215	0.378817	0.300704	0.119058	0.114941	0.277497	0.061388	0.173413	0.240846	0.383453	0.352168	0.29149	0.517131	0.357262	0.379664	0.491611	0.266495	0.539218	0.668244	0.38746	0.427154	0.404881	0.074959	0.451349	0.506698	0.43396	0.669763	0.488285	0.594575	0.605595
14	0.34582	0.359525	0.337668	0.233184	0.200009	0.208287	0.327179	0.228903	0.284196	0.365989	0.458534	0.270862	0.407991	0.307924	0.409848	0.386762	0.175431	-0.11004	0.399028	0.357265	0.379419	0.284769	0.075919	0.090048	0.258194	0.070972	0.155383	0.215919	0.391769	0.348313	0.286807	0.5006	0.358872	0.359732	0.476305	0.268858	0.523471	0.666761	0.359824	0.412147	0.383592	0.062521	0.443999	0.494997	0.412166	0.648921	0.465885	0.57157	0.589972
15	0.322145	0.332332	0.299016	0.209326	0.244388	0.184264	0.330094	0.21868	0.306856	0.341424	0.408824	0.252603	0.328066	0.225405	0.365483	0.362566	0.168646	-0.13813	0.358502	0.336019	0.392043	0.266309	0.054483	0.073651	0.248976	0.118768	0.110114	0.184735	0.345636	0.332313	0.289059	0.487814	0.319642	0.378677	0.460448	0.291892	0.52219	0.662739	0.364295	0.36509	0.375921	0.071328	0.445369	0.479249	0.380007	0.626871	0.438822	0.548666	0.574968
16	0.2984	0.305666	0.262557	0.185357	0.285304	0.160123	0.333247	0.207957	0.32606	0.316377	0.364539	0.230663	0.248205	0.147828	0.320931	0.338369	0.161861	-0.16621	0.317976	0.314773	0.404666	0.247849	0.033046	0.057255	0.239757	0.166564	0.064845	0.153552	0.299502	0.316313	0.291311	0.475027	0.280412	0.397621	0.444591	0.314925	0.520908	0.658718	0.368766	0.318032	0.368249	0.080134	0.446739	0.4635	0.347848	0.604822	0.411759	0.525762	0.559964
17	0.270552	0.310075	0.289722	0.158172	0.225797	0.132565	0.343304	0.187762	0.279575	0.282174	0.39622	0.157189	0.169247	0.139456	0.273755	0.314173	0.155076	-0.1943	0.277451	0.293527	0.409617	0.228727	0.015682	0.04386	0.233191	0.198912	0.024625	0.126225	0.250657	0.30128	0.293563	0.462241	0.241183	0.416566	0.428733	0.333812	0.519114	0.655509	0.371467	0.278133	0.358257	0.088099	0.446985	0.446859	0.320317	0.583472	0.390533	0.508638	0.544788
18	0.242705	0.314485	0.316886	0.130987	0.166291	0.105007	0.353362	0.167568	0.23309	0.247971	0.427901	0.083714	0.090289	0.131083	0.226579	0.337641	0.134486	-0.17729	0.291783	0.274649	0.356475	0.205297	0.021395	0.049978	0.243867	0.11429	0.022639	0.123971	0.181279	0.293573	0.250411	0.460712	0.244865	0.407682	0.425847	0.321304	0.513432	0.657585	0.360765	0.284763	0.330695	0.089687	0.438723	0.424416	0.322867	0.563037	0.376941	0.499606	0.52937
19	0.221895	0.297009	0.322191	0.131755	0.148939	0.071277	0.354608	0.130118	0.195744	0.22552	0.443815	0.038983	0.021664	0.140283	0.200782	0.361917	0.113661	-0.15951	0.307044	0.255811	0.303333	0.181867	0.027107	0.056097	0.254543	0.029669	0.020653	0.121717	0.1119	0.285866	0.206488	0.459373	0.248547	0.398326	0.42318	0.308796	0.507751	0.659661	0.350063	0.291393	0.303132	0.091276	0.430461	0.401972	0.325417	0.542603	0.36335	0.490575	0.513952
20	0.211642	0.246704	0.294705	0.174452	0.199403	0.02762	0.341678	0.064911	0.173099	0.220698	0.43608	0.037368	-0.03146	0.175843	0.207051	0.386193	0.092837	-0.14173	0.322306	0.236974	0.250191	0.158437	0.03282	0.062215	0.265219	-0.05495	0.018666	0.119463	0.042522	0.278159	0.162566	0.458034	0.25223	0.388971	0.420513	0.296287	0.502069	0.661737	0.339361	0.298023	0.27557	0.092864	0.422199	0.379528	0.327967	0.523926	0.350921	0.482791	0.498414
21	0.201388	0.196398	0.267219	0.217149	0.249867	-0.01604	0.328749	-0.0003	0.150454	0.215876	0.428345	0.035754	-0.08459	0.211403	0.213321	0.381977	0.095054	-0.1248	0.310306	0.215373	0.240748	0.144178	0.034121	0.045314	0.263869	-0.01119	0.017685	0.109737	0.04947	0.263239	0.15341	0.44698	0.241396	0.370523	0.413751	0.279751	0.504516	0.655301	0.346385	0.268935	0.262957	0.09043	0.416202	0.374653	0.315366	0.521065	0.348966	0.486238	0.481801
22	0.179378	0.188041	0.264981	0.229394	0.216845	-0.02055	0.33017	-0.02211	0.146405	0.170518	0.423815	0.010157	-0.1071	0.169387	0.180973	0.357409	0.112631	-0.10843	0.280132	0.19193	0.245872	0.13271	0.03408	0.021408	0.258858	0.075372	0.017038	0.097521	0.081861	0.245915	0.169086	0.429449	0.220885	0.346013	0.404064	0.261989	0.509436	0.646274	0.358803	0.229968	0.255328	0.086654	0.410961	0.375634	0.297713	0.518205	0.34701	0.489684	0.465188
23	0.153092	0.194937	0.271925	0.230566	0.153466	-0.01084	0.337265	-0.02676	0.149118	0.11042	0.420451	-0.02343	-0.11941	0.09916	0.135751	0.332841	0.130208	-0.09207	0.249958	0.168487	0.250997	0.121241	0.034038	-0.0025	0.253847	0.161932	0.016392	0.085305	0.114251	0.22859	0.184762	0.411918	0.200375	0.321504	0.394377	0.244226	0.514356	0.637247	0.371221	0.191001	0.247699	0.082879	0.405719	0.376615	0.280061	0.515344	0.345055	0.49313	0.448575
24	0.128178	0.200885	0.276744	0.225593	0.096144	-0.00549	0.343707	-0.03202	0.149824	0.05994	0.411622	-0.04706	-0.13827	0.042261	0.095349	0.308993	0.136797	-0.09463	0.226811	0.161077	0.253222	0.12262	0.052354	-0.02058	0.24531	0.167779	0.017076	0.079589	0.144029	0.214575	0.191917	0.397007	0.182334	0.297354	0.385606	0.23727	0.511251	0.624165	0.374236	0.175227	0.245358	0.097834	0.400677	0.372972	0.273155	0.501586	0.347266	0.47574	0.436847
25	0.122462	0.19355	0.251819	0.134598	0.123618	-0.06132	0.341009	-0.04283	0.132475	0.096029	0.361421	0.018948	-0.21623	0.105309	0.09144	0.288352	0.099431	-0.1729	0.231774	0.217798	0.251098	0.143268	0.096372	-0.03052	0.231834	0.060627	0.019755	0.083625	0.169887	0.205525	0.164989	0.392579	0.174171	0.274644	0.380499	0.245443	0.496109	0.605	0.364089	0.191926	0.25095	0.140884	0.395934	0.362394	0.282368	0.485104	0.350519	0.453141	0.426341
26	0.116745	0.186216	0.226895	0.043602	0.151092	-0.11714	0.338311	-0.05363	0.115126	0.132117	0.311219	0.08496	-0.29418	0.168356	0.08753	0.267711	0.062064	-0.25118	0.236737	0.274518	0.248975	0.163917	0.140389	-0.04046	0.218359	-0.04653	0.022434	0.087661	0.195745	0.196474	0.138061	0.388151	0.166009	0.251934	0.375392	0.253615	0.480967	0.585835	0.353941	0.208625	0.256541	0.183933	0.39119	0.351816	0.29158	0.468621	0.353771	0.430542	0.415834
27	0.110784	0.181819	0.217222	0.025331	0.177328	-0.14821	0.334236	-0.05813	0.092601	0.144707	0.297234	0.117427	-0.34744	0.20318	0.064552	0.24707	0.024698	-0.32946	0.2417	0.331239	0.246665	0.183621	0.18273	-0.0504	0.20521	-0.15025	0.024196	0.091033	0.22033	0.188097	0.111134	0.383722	0.157847	0.229224	0.370285	0.261575	0.465981	0.568073	0.343244	0.225798	0.261655	0.224917	0.386105	0.341495	0.300545	0.458906	0.333444	0.413492	0.406636
28	0.104479	0.181536	0.228902	0.108874	0.201829	-0.1446	0.328094	-0.0549	0.063308	0.128579	0.327513	0.111557	-0.37052	0.203509	0.019781	0.242956	0.044682	-0.33089	0.26661	0.324396	0.233382	0.175934	0.176479	-0.06052	0.201528	-0.15457	-0.00064	0.075149	0.208007	0.199255	0.10409	0.383675	0.162354	0.232578	0.363732	0.263345	0.455521	0.590999	0.316585	0.251989	0.238591	0.144013	0.360866	0.346384	0.29489	0.456925	0.286167	0.402782	0.398933
29	0.098174	0.181253	0.240581	0.192418	0.22633	-0.14098	0.321953	-0.05168	0.034014	0.11245	0.357793	0.105687	-0.39361	0.203837	-0.02499	0.243414	0.079003	-0.31506	0.296507	0.301663	0.220099	0.168247	0.170227	-0.07064	0.197845	-0.1589	-0.02547	0.059265	0.195683	0.210413	0.102017	0.384612	0.170029	0.242449	0.356819	0.265116	0.44506	0.613926	0.289926	0.27818	0.215528	0.063108	0.335627	0.351272	0.289234	0.454943	0.23889	0.392073	0.39123
30	0.121025	0.168922	0.229969	0.214859	0.234583	-0.14746	0.310551	-0.05775	-0.00906	0.081234	0.369715	0.104362	-0.36336	0.184489	-0.02861	0.243872	0.113324	-0.29924	0.326404	0.278929	0.206816	0.16056	0.163975	-0.08075	0.194163	-0.16322	-0.0503	0.04338	0.18336	0.221571	0.099945	0.385549	0.177703	0.252319	0.349905	0.266887	0.4346	0.636853	0.263267	0.304371	0.192464	-0.0178	0.310387	0.35616	0.283579	0.453171	0.196842	0.38017	0.384972
31	0.152749	0.152924	0.21319	0.220399	0.238342	-0.15673	0.297694	-0.06639	-0.05557	0.046246	0.377047	0.104174	-0.31978	0.160222	-0.02195	0.244464	0.125744	-0.28483	0.320202	0.276141	0.207284	0.158105	0.11173	-0.07855	0.19544	-0.22551	-0.03967	0.03891	0.176133	0.208364	0.095304	0.383514	0.190845	0.250592	0.342997	0.257018	0.429122	0.623822	0.251717	0.290184	0.183668	-0.05275	0.308678	0.361432	0.2768	0.452587	0.18878	0.361506	0.386899
32	0.175692	0.140865	0.197343	0.222396	0.244169	-0.16596	0.284952	-0.07675	-0.10128	0.017418	0.374924	0.110911	-0.29234	0.12604	-0.02198	0.245271	0.10531	-0.27254	0.259852	0.303269	0.215155	0.158267	0.03649	-0.07018	0.199197	-0.31678	-0.0113	0.040147	0.171454	0.182975	0.086532	0.376699	0.212783	0.230208	0.336096	0.24133	0.426135	0.592813	0.247721	0.257284	0.182005	-0.06472	0.31964	0.366894	0.269416	0.452002	0.180718	0.342842	0.388826
33	0.132142	0.158625	0.188548	0.197563	0.268608	-0.17483	0.273233	-0.09827	-0.14172	0.028632	0.319217	0.162663	-0.36981	0.027413	-0.06555	0.246079	0.084877	-0.26025	0.199501	0.330397	0.223027	0.158428	-0.03875	-0.06181	0.202954	-0.40805	0.017073	0.041385	0.166775	0.157585	0.07776	0.369884	0.234721	0.209823	0.329196	0.225642	0.423148	0.561803	0.243725	0.224384	0.180342	-0.07669	0.330601	0.372357	0.262033	0.451418	0.172656	0.324178	0.390753
34	0.088593	0.176384	0.179754	0.172731	0.293048	-0.18371	0.261515	-0.1198	-0.18217	0.039845	0.26351	0.214415	-0.44728	-0.07121	-0.10911	0.246887	0.064443	-0.24796	0.13915	0.357526	0.227296	0.158223	-0.10929	-0.04928	0.204786	-0.47982	0.031224	0.034273	0.154336	0.140324	0.068987	0.36307	0.256659	0.189439	0.322296	0.221958	0.415894	0.541315	0.23681	0.207143	0.18237	-0.11063	0.330764	0.374741	0.253648	0.44042	0.16855	0.322291	0.387276
35	0.084786	0.185515	0.183731	0.168851	0.27555	-0.19927	0.24452	-0.13337	-0.20864	0.041868	0.249822	0.228647	-0.49026	-0.09617	-0.09966	0.253052	0.036805	-0.22041	0.145111	0.330677	0.223156	0.157227	-0.1697	-0.02778	0.202467	-0.50612	0.0122	0.007679	0.12379	0.142029	0.09171	0.361099	0.263869	0.173383	0.318816	0.246282	0.39943	0.54353	0.223599	0.223693	0.193008	-0.1958	0.30573	0.369943	0.242929	0.42734	0.165236	0.323759	0.382718
36	0.129551	0.184099	0.203317	0.190579	0.203209	-0.22357	0.220139	-0.13722	-0.21804	0.03266	0.287492	0.197023	-0.49108	-0.03109	-0.02961	0.259308	0.009044	-0.19261	0.152195	0.302913	0.219016	0.156231	-0.2301	-0.00628	0.200147	-0.53241	-0.00683	-0.01891	0.093243	0.143734	0.114965	0.35921	0.270571	0.157477	0.315455	0.270606	0.382966	0.545745	0.210387	0.240242	0.203646	-0.28097	0.280695	0.365145	0.23221	0.41426	0.161922	0.325227	0.37816
37	0.174317	0.182683	0.222903	0.212308	0.130869	-0.24787	0.195757	-0.14106	-0.22744	0.023451	0.325161	0.165399	-0.4919	0.033998	0.040436	0.265565	-0.01872	-0.1648	0.159279	0.27515	0.214876	0.155235	-0.29051	0.015216	0.197827	-0.5587	-0.02585	-0.04551	0.062697	0.145439	0.138221	0.357322	0.277273	0.141571	0.312094	0.294931	0.366503	0.547959	0.197176	0.256792	0.214285	-0.36615	0.25566	0.360346	0.22149	0.405049	0.156025	0.325478	0.369252
38	0.164653	0.152203	0.216599	0.150896	0.147961	-0.20772	0.220953	-0.1419	-0.18549	0.01965	0.284002	0.178954	-0.50258	0.051085	-0.00116	0.261781	-0.02953	-0.13438	0.163763	0.270358	0.221649	0.153887	-0.23854	-0.00469	0.189819	-0.5802	-0.11693	-0.07026	0.131602	0.137592	0.136893	0.36473	0.275467	0.139686	0.312885	0.273127	0.382367	0.530287	0.201935	0.223836	0.219657	-0.27645	0.257711	0.3456	0.220677	0.399456	0.147712	0.324591	0.355995
39	0.139935	0.112879	0.203134	0.066488	0.189789	-0.14975	0.259861	-0.14199	-0.13071	0.017201	0.223136	0.203804	-0.51573	0.056173	-0.06782	0.250321	-0.02823	-0.10208	0.16639	0.283133	0.229202	0.152521	-0.1827	-0.02678	0.181511	-0.60145	-0.2118	-0.09492	0.20761	0.129061	0.118006	0.378778	0.267157	0.148522	0.316852	0.248896	0.399932	0.511568	0.207313	0.189173	0.224652	-0.17425	0.261696	0.330143	0.220572	0.393864	0.139399	0.323704	0.342738
40	0.118139	0.087453	0.192574	-0.00691	0.221985	-0.09936	0.290348	-0.14577	-0.08864	0.022541	0.173825	0.221999	-0.50827	0.052966	-0.13271	0.238861	-0.02694	-0.06978	0.169016	0.295908	0.236754	0.151155	-0.12686	-0.04887	0.173203	-0.6227	-0.30667	-0.11958	0.283618	0.120531	0.099119	0.392827	0.258846	0.157358	0.32082	0.224664	0.417497	0.492849	0.212691	0.15451	0.229648	-0.07206	0.265681	0.314686	0.220467	0.389251	0.132861	0.321587	0.328706
41	0.115334	0.152368	0.200897	-0.00875	0.191576	-0.10634	0.266099	-0.17353	-0.11862	0.072017	0.189988	0.20692	-0.3978	0.008283	-0.18875	0.229058	-0.02019	-0.05321	0.170409	0.301609	0.222513	0.141594	-0.10227	-0.0381	0.159667	-0.57031	-0.27503	-0.1096	0.339234	0.11869	0.082888	0.402173	0.245683	0.165019	0.3224	0.22469	0.424148	0.484407	0.224722	0.16636	0.220727	-0.06046	0.277507	0.307613	0.21174	0.388558	0.134235	0.313986	0.311222
42	0.112529	0.217284	0.20922	-0.01058	0.161166	-0.11333	0.241849	-0.20129	-0.14861	0.121493	0.206152	0.19184	-0.28732	-0.0364	-0.24478	0.228645	0.013804	-0.11532	0.165634	0.271933	0.192704	0.126181	-0.09851	-0.00541	0.142644	-0.46531	-0.15302	-0.07488	0.380284	0.121965	0.079942	0.388009	0.208259	0.166805	0.312048	0.242042	0.423003	0.482818	0.241505	0.209217	0.201166	-0.11814	0.29533	0.306529	0.196854	0.387864	0.135608	0.306385	0.293739
43	0.093412	0.214719	0.205577	0.008557	0.157698	-0.11046	0.216163	-0.21877	-0.14283	0.116026	0.19292	0.176389	-0.23511	-0.03965	-0.25246	0.228232	0.047798	-0.17744	0.16086	0.242258	0.162896	0.110768	-0.09476	0.027284	0.125621	-0.36031	-0.03102	-0.04016	0.421334	0.12524	0.076996	0.373845	0.170834	0.168592	0.301696	0.259395	0.421858	0.481229	0.258287	0.252075	0.181604	-0.17581	0.313152	0.305445	0.181968	0.387171	0.136981	0.298784	0.276256
44	0.056857	0.140021	0.189144	0.050125	0.183029	-0.09706	0.188942	-0.22597	-0.10129	0.055617	0.152187	0.160591	-0.23739	-0.00146	-0.21489	0.227819	0.081792	-0.23955	0.156085	0.212583	0.142102	0.097868	-0.09778	0.047024	0.112036	-0.27946	0.062402	-0.01531	0.440218	0.127204	0.07405	0.359681	0.133409	0.170379	0.291344	0.266797	0.422933	0.481765	0.270705	0.283811	0.171841	-0.22651	0.326023	0.305164	0.170096	0.3856	0.124414	0.309409	0.26477
45	0.020303	0.065324	0.172711	0.091692	0.208359	-0.08366	0.161721	-0.23316	-0.05976	-0.00479	0.111455	0.144792	-0.23967	0.036735	-0.17732	0.217967	0.073371	-0.23973	0.144251	0.233325	0.157365	0.094054	-0.12534	0.019948	0.11088	-0.2859	0.052457	-0.02613	0.378968	0.123926	0.095598	0.349869	0.136335	0.185304	0.291542	0.234395	0.432886	0.489983	0.267343	0.275343	0.201275	-0.2493	0.319084	0.307781	0.170282	0.383895	0.109702	0.322838	0.254206
46	0.014153	0.047454	0.177106	0.085457	0.242074	-0.0987	0.151635	-0.19153	-0.09246	0.019188	0.130026	0.10567	-0.16312	0.035996	-0.13175	0.205243	0.053217	-0.22443	0.130653	0.266671	0.172627	0.09024	-0.1529	-0.00713	0.109724	-0.29234	0.042513	-0.03694	0.317718	0.120649	0.123921	0.34126	0.150421	0.203864	0.294659	0.201994	0.442838	0.4982	0.263981	0.266874	0.23071	-0.27209	0.312146	0.310399	0.170468	0.382189	0.094991	0.336267	0.243643
47	0.014083	0.04095	0.185176	0.070786	0.277269	-0.11943	0.144978	-0.14014	-0.14001	0.060047	0.159063	0.062433	-0.0708	0.027471	-0.08477	0.192519	0.033063	-0.20913	0.117055	0.300017	0.18789	0.086426	-0.18046	-0.03421	0.108568	-0.29878	0.032569	-0.04775	0.256468	0.117372	0.152244	0.332651	0.164507	0.222423	0.297776	0.169593	0.452791	0.506418	0.260619	0.258405	0.260144	-0.29489	0.305208	0.313017	0.170654	0.381102	0.074958	0.330494	0.23619
48	0.021178	0.044978	0.194473	0.054945	0.300463	-0.1195	0.143017	-0.1028	-0.18063	0.084244	0.189904	0.025004	0.006841	0.025912	-0.05222	0.187022	0.017796	-0.19908	0.11965	0.297363	0.189005	0.100555	-0.12965	-0.04253	0.108064	-0.35917	-0.02837	-0.03239	0.22467	0.109032	0.164519	0.330011	0.175604	0.229353	0.29608	0.144746	0.443884	0.498467	0.239118	0.235791	0.237921	-0.25791	0.318235	0.302786	0.178327	0.380522	0.050571	0.307919	0.231457
49	0.060188	0.095918	0.209232	0.034423	0.275659	-0.02754	0.159848	-0.12805	-0.1904	0.034229	0.227964	0.013446	0.01915	0.055386	-0.084	0.194007	0.010392	-0.1975	0.148296	0.232528	0.187289	0.118273	-0.06317	-0.04711	0.10769	-0.42907	-0.09951	-0.01178	0.198762	0.09968	0.150979	0.337679	0.181538	0.216195	0.286071	0.121409	0.431204	0.487282	0.21399	0.210347	0.205367	-0.20898	0.335255	0.289986	0.187497	0.379941	0.026185	0.285343	0.226724
50	0.099198	0.146858	0.223991	0.013902	0.250855	0.064425	0.176679	-0.1533	-0.20016	-0.01579	0.266023	0.001888	0.031459	0.084859	-0.11577	0.200993	0.002987	-0.19592	0.176943	0.167693	0.185574	0.135991	0.003314	-0.05168	0.107316	-0.49898	-0.17065	0.008826	0.172855	0.090328	0.137439	0.345348	0.187472	0.203037	0.276062	0.098073	0.418525	0.476098	0.188862	0.184903	0.172812	-0.16006	0.352275	0.277185	0.196667	0.377376	0.005893	0.262146	0.220522
51	0.098574	0.157969	0.229983	0.03035	0.26183	0.053122	0.167505	-0.16022	-0.19233	-0.05867	0.277474	0.008237	0.045939	0.123992	-0.10377	0.207978	-0.00442	-0.19434	0.205589	0.102858	0.18407	0.136245	0.028163	-0.05208	0.117763	-0.53765	-0.21248	0.033736	0.178827	0.087076	0.123899	0.353016	0.193406	0.189878	0.266053	0.092493	0.406988	0.460552	0.180122	0.166769	0.170431	-0.13767	0.350136	0.266458	0.189148	0.365965	0.003843	0.23618	0.207773
52	0.065522	0.136493	0.229271	0.07507	0.300166	-0.03715	0.138443	-0.15001	-0.16804	-0.09533	0.265641	0.030255	0.062321	0.171577	-0.05346	0.1926	-0.01721	-0.23558	0.205529	0.133269	0.182807	0.11783	0.008506	-0.04802	0.139779	-0.54062	-0.21848	0.063564	0.221233	0.090794	0.074548	0.340443	0.194496	0.173865	0.264604	0.107207	0.396758	0.440346	0.188901	0.156449	0.202534	-0.14561	0.324581	0.2581	0.162556	0.354554	0.001792	0.210213	0.195024
53	0.03247	0.115017	0.228558	0.119789	0.338501	-0.12742	0.109382	-0.13979	-0.14375	-0.13198	0.253809	0.052273	0.078702	0.219162	-0.00316	0.176451	-0.03009	-0.27754	0.204982	0.165294	0.181544	0.099416	-0.01115	-0.04397	0.161795	-0.54359	-0.22449	0.093392	0.263638	0.094513	0.023962	0.327171	0.19542	0.157752	0.263451	0.121922	0.386528	0.420139	0.197681	0.146128	0.234637	-0.15355	0.299025	0.249742	0.135964	0.343144	-0.00026	0.184246	0.182275
54	0.009013	0.12704	0.209977	0.087461	0.301566	-0.1112	0.088577	-0.1758	-0.15208	-0.11114	0.222281	0.067866	0.058765	0.272724	0.013622	0.160302	-0.04297	-0.31951	0.204435	0.197319	0.179245	0.086108	-0.02755	-0.0359	0.179669	-0.54573	-0.22855	0.117778	0.298443	0.097648	-0.02662	0.3139	0.196343	0.14164	0.262298	0.133875	0.376717	0.406693	0.205217	0.142421	0.256167	-0.1659	0.275228	0.243906	0.111971	0.359139	-0.01326	0.207826	0.196968
55	-0.01357	0.142785	0.189772	0.048128	0.256268	-0.08314	0.068862	-0.21996	-0.16618	-0.08015	0.187724	0.082325	0.032419	0.32734	0.025244	0.16117	-0.03666	-0.33576	0.200764	0.180419	0.167626	0.111464	-0.01924	0.002516	0.166182	-0.54161	-0.21515	0.093177	0.264842	0.095531	-0.01225	0.323635	0.188464	0.140992	0.261713	0.124927	0.37007	0.437189	0.203345	0.181703	0.182549	-0.21801	0.26725	0.260763	0.111379	0.378754	-0.02771	0.23795	0.215286
56	-0.03088	0.144989	0.176638	0.022332	0.237119	-0.06354	0.066041	-0.24351	-0.1743	-0.06263	0.158475	0.090934	0.003835	0.358411	0.006968	0.175052	-0.01664	-0.33366	0.194862	0.128572	0.156007	0.136821	-0.01094	0.040933	0.152696	-0.53748	-0.20175	0.068577	0.231241	0.093415	0.045434	0.348707	0.174717	0.150654	0.261507	0.115978	0.363424	0.467684	0.201474	0.220984	0.10893	-0.27012	0.259273	0.27762	0.110786	0.39837	-0.04216	0.268074	0.233603
57	-0.03235	0.102699	0.184718	0.037144	0.303889	-0.07169	0.11873	-0.18459	-0.1585	-0.09899	0.148421	0.078392	-0.03284	0.304357	-0.10955	0.188934	0.003375	-0.33156	0.188959	0.076725	0.144388	0.162178	-0.00263	0.079351	0.139209	-0.53336	-0.18834	0.043976	0.19764	0.091299	0.103117	0.373779	0.16097	0.160315	0.261301	0.10703	0.356778	0.49818	0.199602	0.260265	0.035312	-0.32223	0.251296	0.294477	0.110193	0.403496	-0.03669	0.282493	0.238934
58	-0.03382	0.060409	0.192798	0.051957	0.370659	-0.07984	0.171419	-0.12567	-0.14269	-0.13535	0.138366	0.065849	-0.06952	0.250302	-0.22607	0.199315	0.019358	-0.33441	0.184823	0.04492	0.142784	0.162059	-0.03846	0.071625	0.126326	-0.55361	-0.20873	0.027036	0.171397	0.085308	0.14674	0.389486	0.152297	0.166272	0.260684	0.098607	0.364215	0.470646	0.199028	0.243436	0.03325	-0.29573	0.248172	0.285367	0.117473	0.398274	-0.01701	0.285693	0.234987
59	-0.01591	0.045767	0.202557	0.037106	0.385803	-0.08431	0.198914	-0.11514	-0.11945	-0.13419	0.122493	0.031587	-0.05667	0.201523	-0.22528	0.194104	0.019208	-0.35704	0.187752	0.093286	0.144518	0.154188	-0.08771	0.049856	0.113645	-0.58198	-0.24039	0.01288	0.147829	0.077908	0.134129	0.36773	0.163922	0.155726	0.258241	0.09036	0.375939	0.42545	0.19885	0.211086	0.057208	-0.24303	0.246667	0.267601	0.127378	0.393051	0.002676	0.288893	0.231041
60	0.014931	0.049557	0.213435	0.00248	0.36653	-0.08616	0.208415	-0.14161	-0.09013	-0.10232	0.101858	-0.02045	-0.0033	0.157059	-0.1285	0.188892	0.019059	-0.37967	0.190682	0.141652	0.146251	0.146317	-0.13697	0.028087	0.100963	-0.61036	-0.27204	-0.00127	0.124262	0.070509	0.121518	0.345974	0.175548	0.14518	0.255797	0.082113	0.387663	0.380254	0.198672	0.178737	0.081167	-0.19034	0.245162	0.249836	0.137283	0.38893	0.010726	0.283379	0.221425
61	0.045769	0.053347	0.224312	-0.03215	0.347257	-0.088	0.217916	-0.16808	-0.0608	-0.07045	0.081223	-0.07248	0.050064	0.112594	-0.03173	0.18368	0.01891	-0.40231	0.193611	0.190018	0.150125	0.148444	-0.14441	0.019302	0.098866	-0.62802	-0.27255	0.004003	0.107976	0.071164	0.108907	0.324218	0.187173	0.134634	0.253354	0.07839	0.389024	0.348324	0.198148	0.149771	0.10296	-0.15732	0.24646	0.237635	0.144462	0.387596	-0.01322	0.255822	0.197469
62	0.052275	0.057587	0.22079	-0.07196	0.344625	-0.0711	0.203086	-0.18852	-0.06967	-0.05511	0.058456	-0.03422	0.03517	0.154666	-0.0258	0.182694	0.007321	-0.37561	0.193156	0.153659	0.157208	0.16557	-0.08914	0.029993	0.112646	-0.62961	-0.22633	0.03843	0.102614	0.083902	0.106185	0.333417	0.200161	0.112727	0.247404	0.081451	0.374841	0.336291	0.19714	0.125541	0.121271	-0.15595	0.251964	0.233782	0.147553	0.386261	-0.03717	0.228266	0.173512
63	0.0575	0.06185	0.21651	-0.11204	0.342868	-0.05286	0.186519	-0.20816	-0.0836	-0.0416	0.035452	0.012259	0.01407	0.204605	-0.02635	0.182994	-0.00775	-0.33527	0.191671	0.091515	0.16429	0.182696	-0.03386	0.040683	0.126426	-0.63119	-0.18012	0.072858	0.097252	0.09664	0.106473	0.352037	0.213563	0.087361	0.240387	0.084512	0.360657	0.324259	0.196132	0.10131	0.139582	-0.15458	0.257467	0.229928	0.150643	0.384927	-0.06112	0.20071	0.149556
64	0.059538	0.066677	0.215514	-0.12573	0.343072	-0.05407	0.176132	-0.22223	-0.09856	-0.03818	0.035809	0.029769	-0.01851	0.235342	-0.04025	0.183293	-0.02282	-0.29493	0.190186	0.02937	0.17093	0.198433	0.019263	0.050975	0.139648	-0.62818	-0.13773	0.106268	0.091975	0.109011	0.106761	0.370657	0.226965	0.061995	0.23337	0.088189	0.346763	0.312775	0.194926	0.078941	0.156298	-0.15425	0.262446	0.226257	0.153875	0.365471	-0.0632	0.199118	0.168975
65	0.054139	0.072928	0.222179	-0.07264	0.348234	-0.10445	0.181378	-0.21959	-0.11666	-0.06504	0.100407	-0.03237	-0.08265	0.213273	-0.09081	0.178887	-0.02754	-0.28187	0.186247	-0.01484	0.15142	0.173909	0.009939	0.037702	0.119982	-0.5378	-0.16797	0.110185	0.089151	0.110747	0.107005	0.388008	0.227757	0.053532	0.228091	0.128209	0.349894	0.317213	0.18798	0.110545	0.126778	-0.18407	0.23643	0.233327	0.165462	0.345062	-0.06413	0.19938	0.191494
66	0.048741	0.079179	0.228845	-0.01956	0.353397	-0.15483	0.186624	-0.21695	-0.13475	-0.0919	0.165006	-0.09451	-0.14679	0.191205	-0.14137	0.166351	-0.0156	-0.31268	0.17836	-0.02807	0.13191	0.149385	0.000614	0.024428	0.100316	-0.44741	-0.19822	0.114101	0.086328	0.112482	0.107173	0.403167	0.206768	0.076457	0.226039	0.168228	0.353024	0.321652	0.181034	0.142149	0.097258	-0.21389	0.210414	0.240397	0.177049	0.324653	-0.06505	0.199643	0.214012
67	0.041345	0.075393	0.24449	0.005338	0.324147	-0.17377	0.204535	-0.20432	-0.11873	-0.1061	0.174418	-0.09436	-0.16843	0.151974	-0.10519	0.153816	-0.00367	-0.3435	0.170474	-0.0413	0.1124	0.124861	-0.00871	0.011155	0.08065	-0.35702	-0.22847	0.118018	0.083504	0.114217	0.107341	0.418326	0.185778	0.099383	0.223988	0.208247	0.356155	0.32609	0.174088	0.173752	0.067738	-0.24372	0.184398	0.247467	0.188636	0.327562	-0.07157	0.198509	0.228962
68	0.032794	0.065796	0.264971	0.015051	0.273506	-0.17317	0.23032	-0.18455	-0.07834	-0.11128	0.147039	-0.05269	-0.16173	0.102073	-0.0151	0.141281	0.00827	-0.37431	0.162587	-0.05453	0.120807	0.118865	-0.01706	-0.0186	0.073109	-0.37843	-0.22954	0.11426	0.142498	0.105271	0.107509	0.433485	0.164789	0.122309	0.221937	0.202205	0.358883	0.340649	0.173984	0.168576	0.057318	-0.23502	0.18477	0.240737	0.189207	0.343971	-0.08132	0.196568	0.239531
69	0.024242	0.056199	0.285452	0.024764	0.222866	-0.17257	0.256105	-0.16478	-0.03795	-0.11645	0.11966	-0.01102	-0.15504	0.052172	0.075004	0.147386	-0.02896	-0.34152	0.14299	-0.06294	0.144247	0.122133	-0.02497	-0.0566	0.071631	-0.46005	-0.2149	0.106369	0.234778	0.090573	0.093571	0.427241	0.145695	0.121289	0.225834	0.173131	0.361409	0.359898	0.17705	0.146356	0.057182	-0.20558	0.19935	0.226577	0.183845	0.36038	-0.09107	0.194626	0.250099
70	0.030205	0.033487	0.26086	0.039083	0.310117	-0.22714	0.295206	-0.17289	-0.01561	-0.11947	0.107082	-0.05299	-0.11276	0.045495	0.041511	0.154473	-0.06878	-0.30654	0.122989	-0.07119	0.167686	0.125402	-0.03287	-0.0946	0.070153	-0.54166	-0.20026	0.098479	0.327058	0.075875	0.079147	0.420258	0.126666	0.119443	0.229936	0.144058	0.363935	0.379147	0.180116	0.124137	0.057047	-0.17614	0.21393	0.212417	0.178484	0.368351	-0.09548	0.194942	0.257864
71	0.036669	0.010323	0.235503	0.05348	0.402123	-0.28361	0.334767	-0.183	0.005435	-0.12228	0.095561	-0.10257	-0.06795	0.041904	-0.00081	0.161559	-0.1086	-0.27155	0.102988	-0.07943	0.177773	0.126103	-0.05295	-0.11994	0.075971	-0.57742	-0.17972	0.089216	0.397157	0.071223	0.064723	0.413276	0.107637	0.117598	0.234039	0.125143	0.36642	0.384941	0.18343	0.114906	0.062246	-0.15234	0.221436	0.203483	0.17403	0.356634	-0.0874	0.200525	0.258534
72	0.048359	-0.017	0.216736	0.055956	0.442562	-0.31209	0.355781	-0.1934	0.008601	-0.12339	0.089261	-0.14593	-0.03028	0.044926	-0.0077	0.159679	-0.08558	-0.25783	0.099494	-0.08941	0.159046	0.121267	-0.0993	-0.11799	0.097536	-0.51421	-0.14644	0.076752	0.415501	0.090013	0.043767	0.406598	0.112522	0.109302	0.22963	0.128149	0.368817	0.361703	0.187277	0.131655	0.079893	-0.14167	0.213677	0.205823	0.171536	0.344918	-0.07932	0.206107	0.259205
73	0.071324	-0.05329	0.211147	0.034587	0.37987	-0.28461	0.339704	-0.20464	-0.03741	-0.1198	0.096166	-0.17359	-0.01227	0.066131	0.07503	0.150464	-0.01451	-0.25929	0.10779	-0.10063	0.14032	0.116431	-0.14565	-0.11603	0.1191	-0.451	-0.11316	0.064287	0.433845	0.108803	0.018146	0.400136	0.135693	0.096073	0.218712	0.131155	0.371213	0.338465	0.191125	0.148403	0.09754	-0.13101	0.205918	0.208163	0.169042	0.333201	-0.07124	0.21169	0.259875
74	0.094289	-0.08958	0.205558	0.013218	0.317177	-0.25713	0.323627	-0.21587	-0.08343	-0.1162	0.103071	-0.20125	0.005741	0.087335	0.15776	0.141248	0.056556	-0.26075	0.116086	-0.11186	0.121593	0.111595	-0.19199	-0.11408	0.140664	-0.38779	-0.07988	0.051823	0.452189	0.127593	-0.00747	0.393675	0.158865	0.082845	0.207794	0.134161	0.37361	0.315227	0.194973	0.165152	0.115187	-0.12034	0.198159	0.210503	0.166547	0.338669	-0.06676	0.183868	0.259054
75	0.098819	-0.08938	0.197182	0.02146	0.320333	-0.19512	0.33084	-0.22009	-0.10595	-0.12464	0.12194	-0.17561	0.028184	0.105896	0.152394	0.133148	0.109152	-0.27439	0.119382	-0.12133	0.120933	0.104196	-0.21743	-0.07601	0.118792	-0.39196	-0.03187	0.058029	0.433177	0.114442	-0.02398	0.391365	0.176313	0.076684	0.199738	0.13005	0.356475	0.327535	0.204216	0.118738	0.067333	-0.14813	0.194745	0.210869	0.173704	0.34473	-0.06241	0.15548	0.258181
76	0.094131	-0.07094	0.187411	0.044506	0.358947	-0.11311	0.350594	-0.21963	-0.1128	-0.14054	0.148244	-0.1191	0.053194	0.122925	0.096024	0.130624	0.079462	-0.34229	0.100404	-0.12304	0.121563	0.096615	-0.24177	-0.03535	0.093817	-0.39969	0.016913	0.065219	0.412199	0.099609	0.000106	0.407551	0.168269	0.102008	0.204427	0.12543	0.337944	0.342383	0.213744	0.068999	0.0148	-0.17867	0.191643	0.211094	0.181549	0.35079	-0.05806	0.127092	0.257308
77	0.089443	-0.05249	0.177641	0.067552	0.39756	-0.0311	0.370347	-0.21917	-0.11965	-0.15645	0.174548	-0.06259	0.078203	0.139955	0.039654	0.1281	0.049773	-0.41018	0.081425	-0.12474	0.122193	0.089033	-0.2661	0.005298	0.068843	-0.40741	0.065699	0.072408	0.391221	0.084776	0.024194	0.423737	0.160225	0.127332	0.209116	0.120811	0.319413	0.35723	0.223271	0.01926	-0.03773	-0.2092	0.18854	0.211319	0.189395	0.356874	-0.07078	0.140682	0.25
78	0.07419	-0.09994	0.178456	0.075519	0.417792	-0.04732	0.32684	-0.21936	-0.12455	-0.14172	0.198787	-0.13195	-0.01635	0.20585	-0.03125	0.125576	0.020084	-0.47807	0.062447	-0.12645	0.119146	0.081053	-0.28449	0.033023	0.064036	-0.43801	0.077595	0.088352	0.306902	0.096938	0.048282	0.439923	0.152181	0.152655	0.213806	0.121278	0.328382	0.371019	0.223436	0.020061	-0.03281	-0.21475	0.200895	0.202795	0.206192	0.36297	-0.09269	0.176876	0.239225
79	0.058758	-0.14851	0.17945	0.08323	0.437712	-0.06693	0.28226	-0.21957	-0.12939	-0.12647	0.22299	-0.20343	-0.11293	0.27343	-0.10266	0.134056	-0.10954	-0.44497	0.072548	-0.13565	0.113287	0.072786	-0.29862	0.051513	0.073635	-0.48497	0.061281	0.110991	0.174145	0.129742	0.049729	0.431423	0.135982	0.145845	0.215554	0.125378	0.358378	0.384051	0.216913	0.056962	0.01606	-0.20119	0.225071	0.188024	0.229384	0.369066	-0.11461	0.21307	0.228451
80	0.049478	-0.15288	0.182956	0.084632	0.403388	-0.08881	0.250427	-0.2244	-0.1468	-0.11728	0.235526	-0.23832	-0.19344	0.306484	-0.14722	0.145581	-0.26416	-0.38661	0.089919	-0.14692	0.107429	0.06452	-0.31276	0.070002	0.083233	-0.53192	0.044966	0.13363	0.041389	0.162547	0.044915	0.416752	0.117744	0.130147	0.216488	0.129478	0.388375	0.397084	0.210391	0.093863	0.064926	-0.18762	0.249247	0.173253	0.252576	0.37678	-0.11988	0.223376	0.218398
81	0.052501	-0.06884	0.191485	0.074315	0.268329	-0.11488	0.242269	-0.24093	-0.19599	-0.12342	0.218553	-0.17257	-0.22977	0.244593	-0.11793	0.157105	-0.41877	-0.32825	0.10729	-0.1582	0.104221	0.057398	-0.33014	0.084575	0.088709	-0.54563	0.035983	0.147123	-0.05669	0.188229	0.040101	0.402081	0.099507	0.114449	0.217423	0.125595	0.411044	0.405236	0.203656	0.112924	0.104865	-0.16825	0.265217	0.161053	0.268522	0.387498	-0.09423	0.185604	0.209682
82	0.055525	0.015203	0.200015	0.063998	0.133269	-0.14096	0.234111									0.169955	-0.50713	-0.28949	0.104816	-0.16431	0.111616	0.054856	-0.36054	0.083479	0.077693	-0.43914	0.056325	0.124029	-0.00032	0.182184	0.033595	0.391734	0.090258	0.10262	0.217102	0.089777	0.404399	0.393869	0.196077	0.067487	0.105034	-0.12301	0.244636	0.160312	0.25548	0.398216	-0.06859	0.147832	0.200966
83	0.044863	0.00943	0.215807	0.084285	0.11908	-0.14554	0.224639									0.185097	-0.4889	-0.28012	0.072573	-0.1627	0.119011	0.052314	-0.39094	0.082383	0.066676	-0.33264	0.076668	0.100935	0.056053	0.176139	0.024552	0.387873	0.094491	0.097015	0.214898	0.05396	0.397754	0.382503	0.188498	0.022051	0.105203	-0.07777	0.224055	0.15957	0.242437	0.408092	-0.04402	0.111866	0.192753
84	0.028336	-0.03483	0.234711	0.117687	0.156694	-0.14091	0.214605									0.200239	-0.47068	-0.27074	0.04033	-0.16109	0.126406	0.049771	-0.42133	0.081288	0.05566	-0.22615	0.09701	0.077841	0.112426	0.170094	0.015509	0.384012	0.098725	0.09141	0.212694	0.018142	0.391109	0.371136	0.180918	-0.02339	0.105372	-0.03253	0.203474	0.158829	0.229395	0.393541	-0.05044	0.128284	0.19911
85	0.01148	-0.07438	0.250868	0.15045	0.189586	-0.13546	0.205922									0.21538	-0.45245	-0.26092	0.008087	-0.15947	0.126603	0.04683	-0.39571	0.075408	0.056478	-0.24066	0.103225	0.076814	0.133929	0.158698	0.006466	0.380138	0.102958	0.085805	0.21049	0.030767	0.38354	0.384108	0.185175	-0.00161	0.082157	-0.03377	0.216252	0.172074	0.229028	0.37899	-0.05686	0.144701	0.205466
86	-0.01	-0.04781	0.228553	0.174271	0.156365	-0.11859	0.216164									0.198918	-0.47519	-0.22455	0.005999	-0.15188	0.125361	0.04381	-0.35889	0.068572	0.059664	-0.27937	0.106615	0.080199	0.148457	0.146233	0.012465	0.375528	0.096862	0.1054	0.203475	0.054266	0.375786	0.401948	0.1918	0.032035	0.054266	-0.0443	0.235703	0.188116	0.231196	0.364439	-0.06328	0.161118	0.211822
87	-0.03148	-0.02125	0.206239	0.198092	0.123144	-0.10173	0.226406									0.181921	-0.49792	-0.18817	0.003911	-0.14428	0.124118	0.040789	-0.32206	0.061736	0.062849	-0.31807	0.110005	0.083584	0.162985	0.133767	0.018464	0.370918	0.090765	0.124995	0.19646	0.077766	0.368032	0.419788	0.198425	0.065677	0.026375	-0.05484	0.255153	0.204158	0.233364	0.340154	-0.08023	0.171318	0.21379
88	-0.03197	-0.00162	0.208726	0.205588	0.100927	-0.09502	0.225716									0.164924	-0.52065	-0.1518	0.001822	-0.13669	0.108596	0.045301	-0.30698	0.062851	0.060938	-0.33307	0.077726	0.088639	0.130751	0.128655	0.024463	0.366308	0.084668	0.14459	0.189446	0.099058	0.371993	0.426047	0.198909	0.088256	0.020738	-0.09497	0.257577	0.214016	0.224429	0.31233	-0.10134	0.17906	0.214022
89	-0.00308	0.008293	0.245935	0.190229	0.094116	-0.10251	0.209723									0.170632	-0.42886	-0.15942	0.047377	-0.15599	0.07562	0.059021	-0.31846	0.073683	0.052799	-0.32096	0.004682	0.095734	0.041363	0.132529	0.017374	0.364291	0.069349	0.14415	0.193934	0.117651	0.39027	0.418151	0.192374	0.098191	0.042299	-0.17128	0.23919	0.216315	0.201925	0.284506	-0.12245	0.186801	0.214254
90	0.025812	0.018209	0.283145	0.174871	0.087306	-0.11001	0.19373									0.191477	-0.26589	-0.19438	0.122547	-0.19201	0.042644	0.072741	-0.32994	0.084516	0.04466	-0.30886	-0.06836	0.102829	-0.04802	0.136404	0.00215	0.363884	0.04788	0.130355	0.20609	0.136244	0.408548	0.410255	0.18584	0.108127	0.06386	-0.2476	0.220804	0.218615	0.17942	0.271236	-0.12994	0.193109	0.210917
[truncated: 19 more columns]
