# Supplementary material for: ESCO1 and CTCF enable formation of long chromatin loops by protecting cohesinSTAG1 from WAPL
Source: eLife. 2020 Feb 17;9:e52091. doi: 10.7554/eLife.52091 (PMC7054000; doi:10.7554/eLife.52091)
Supplement: Figure 2—source data 2. [file elife-52091-fig2-data2.xlsx]

## Sheet: Sheet1
-	STAG2-EGFP												EGFP-STAG1
0	1	1	1	1	1	1	1	1	1	1	1	1	1	1	1	1	1	1	1	1	1	1	1	1	1	1	1	1	1	1	1	1	1
1	0.989798	0.970605	0.982009	0.949978	0.953938	0.953938	0.945553	0.794263	0.534277	0.61172	0.650498	0.626641	0.995218	0.990299	0.969549	0.947342	0.965489	1.01244	0.986127	0.986498	0.979619	0.991431	1.00007	1.0127	1.00244	0.994042	1.00066	1.04488	1.01803	0.965961	0.962388	0.95233	0.96446
2	0.762837	0.777484	0.750584	0.765769	0.721819	0.721819	0.72212	0.692951	0.409114	0.487805	0.495918	0.433214	0.912671	0.890393	0.865114	0.843124	0.930937	0.968888	0.935376	0.88954	0.910895	0.841908	0.855393	0.902202	0.888759	0.887736	0.909018	0.935801	0.906552	0.796755	0.850865	0.879178	0.934083
3	0.657961	0.667305	0.622139	0.684167	0.617909	0.617909	0.602174	0.646547	0.362415	0.372589	0.40069	0.334288	0.891803	0.829486	0.808308	0.77145	0.875514	0.915629	0.895547	0.87657	0.899974	0.821421	0.799532	0.838371	0.825475	0.819575	0.868777	0.86067	0.879677	0.725522	0.786039	0.838363	0.895243
4	0.596315	0.571454	0.540931	0.630463	0.527219	0.527219	0.517429	0.600656	0.325732	0.346271	0.3319	0.237579	0.84176	0.807504	0.761494	0.702684	0.820954	0.866873	0.865912	0.813864	0.861702	0.741473	0.777005	0.819667	0.765618	0.791632	0.823957	0.82437	0.83622	0.719123	0.760479	0.777358	0.924163
5	0.529065	0.501829	0.456417	0.557258	0.479343	0.479343	0.466506	0.562823	0.284024	0.285421	0.295186	0.216335	0.834332	0.769204	0.713506	0.677713	0.768408	0.83599	0.827813	0.783274	0.838347	0.727983	0.698436	0.751021	0.720367	0.728944	0.773791	0.753107	0.816175	0.616468	0.711697	0.714603	0.793995
6	0.426276	0.469181	0.411078	0.468542	0.397075	0.397075	0.429789	0.536092	0.249108	0.220736	0.263182	0.177425	0.792878	0.741348	0.684099	0.630424	0.759553	0.807448	0.779626	0.767726	0.817444	0.674765	0.664679	0.749798	0.69639	0.70261	0.741737	0.696167	0.756752	0.57955	0.67198	0.694112	0.79074
7	0.384924	0.427771	0.390213	0.501486	0.358363	0.358363	0.388576	0.486114	0.243484	0.242291	0.218327	0.151818	0.759153	0.712593	0.649173	0.59704	0.713182	0.764675	0.761294	0.741953	0.782955	0.649418	0.620919	0.751875	0.666488	0.656437	0.69706	0.720415	0.742386	0.576352	0.636287	0.646427	0.804934
8	0.398199	0.403138	0.341228	0.439027	0.293171	0.293171	0.347392	0.468888	0.213722	0.209464	0.210433	0.135742	0.725273	0.705152	0.615695	0.592633	0.669213	0.723865	0.73522	0.700599	0.756238	0.585194	0.587928	0.704853	0.656905	0.62825	0.735045	0.669979	0.677895	0.510342	0.615407	0.61196	0.78002
9	0.330404	0.354887	0.289848	0.422082	0.242937	0.242937	0.315739	0.446828	0.215586	0.184018	0.173422	0.09108	0.713948	0.678109	0.621725	0.553723	0.693606	0.722973	0.699235	0.692911	0.760203	0.606514	0.557529	0.667146	0.656177	0.596566	0.717763	0.597311	0.652743	0.472709	0.598237	0.553802	0.74015
10	0.301918	0.303028	0.246416	0.402769	0.21869	0.21869	0.293138	0.424442	0.186827	0.173437	0.154467	0.0877459	0.712861	0.659028	0.603809	0.545751	0.660492	0.702385	0.692963	0.651586	0.746487	0.585314	0.559144	0.655191	0.635129	0.576077	0.710277	0.630853	0.650433	0.473808	0.564574	0.523099	0.763942
11	0.285106	0.273625	0.252233	0.369426	0.205329	0.205329	0.268361	0.422023	0.174996	0.163503	0.113297	0.0818499	0.707601	0.61955	0.591161	0.527085	0.648073	0.638829	0.65281	0.628371	0.703876	0.569854	0.503327	0.634007	0.59225	0.552351	0.689227	0.635808	0.62287	0.447757	0.56179	0.558382	0.733252
12	0.238294	0.252655	0.211971	0.369095	0.184413	0.184413	0.281136	0.38284	0.167771	0.148	0.0931304	0.0872852	0.687567	0.62055	0.581394	0.51619	0.612689	0.623037	0.622044	0.634153	0.713152	0.582562	0.488962	0.623208	0.575667	0.523681	0.664243	0.581339	0.611143	0.42874	0.549246	0.507535	0.707721
13	0.234842	0.251607	0.187379	0.314525	0.148834	0.148834	0.217951	0.352219	0.163122	0.151648	0.0983466	0.101949	0.651231	0.59543	0.550896	0.492907	0.567043	0.610042	0.594366	0.63641	0.684199	0.54018	0.486943	0.616147	0.552198	0.512117	0.650749	0.567964	0.594954	0.429402	0.552254	0.509864	0.746777
14	0.196535	0.208466	0.193198	0.325903	0.157396	0.157396	0.195755	0.33597	0.146525	0.118682	0.0806962	0.0964525	0.670953	0.566245	0.532209	0.496354	0.532788	0.620379	0.575812	0.607164	0.678098	0.527231	0.444623	0.60373	0.522767	0.466171	0.630756	0.617791	0.531336	0.388737	0.534835	0.501264	0.686688
15	0.18903	0.201858	0.192107	0.320533	0.122095	0.122095	0.188865	0.325267	0.148097	0.111576	0.0803153	0.102002	0.650797	0.58574	0.52572	0.489558	0.504054	0.571349	0.557256	0.600559	0.668527	0.499237	0.438027	0.584907	0.513164	0.472468	0.62088	0.552478	0.525583	0.354405	0.505835	0.476232	0.695162
16	0.157644	0.171179	0.169644	0.336173	0.112363	0.112363	0.17722	0.321218	0.132876	0.1071	0.0846971	0.0947465	0.635881	0.582128	0.486934	0.46319	0.502682	0.539506	0.558845	0.580215	0.658347	0.497562	0.413279	0.564572	0.497537	0.461542	0.610445	0.533542	0.54412	0.381982	0.526414	0.480168	0.712282
17	0.101454	0.168949	0.129007	0.288117	0.0905867	0.0905867	0.14836	0.296275	0.117049	0.0716205	0.0763625	0.121222	0.605083	0.57296	0.489289	0.443383	0.518761	0.499875	0.541664	0.564622	0.656407	0.493283	0.406646	0.548516	0.496521	0.44457	0.577354	0.488184	0.508223	0.341262	0.48156	0.477397	0.650447
18	0.0844816	0.165193	0.151491	0.293469	0.0928086	0.0928086	0.149813	0.285831	0.142244	0.0443835	0.0687359	0.115074	0.576861	0.551959	0.476009	0.440406	0.529949	0.53102	0.542946	0.53754	0.612657	0.482419	0.388778	0.537691	0.471377	0.413407	0.568127	0.465874	0.480274	0.34326	0.484951	0.441232	0.711552
19	0.0900499	0.130453	0.122189	0.257915	0.0673788	0.0673788	0.133285	0.288992	0.115741	0.0620376	0.0527934	0.112134	0.581318	0.53429	0.456527	0.41497	0.474575	0.532178	0.549491	0.565533	0.610337	0.471573	0.383373	0.513233	0.46031	0.397308	0.566713	0.455118	0.490123	0.334132	0.461186	0.401658	0.634957
20	0.0748938	0.136882	0.126039	0.300465	0.0470906	0.0470906	0.126784	0.276869	0.117476	0.0384454	0.0947151	0.113825	0.567639	0.533502	0.439089	0.396398	0.425863	0.505416	0.520386	0.522737	0.597332	0.454645	0.385413	0.526539	0.460012	0.382628	0.565038	0.454208	0.522305	0.344924	0.456753	0.427308	0.633933
21	0.0685896	0.157748	0.120244	0.240662	0.0126429	0.0126429	0.112332	0.268702	0.120247	0.0423817	0.0816902	0.0931618	0.554771	0.525958	0.453072	0.37607	0.408276	0.461676	0.50855	0.522741	0.586913	0.414422	0.376008	0.503629	0.434397	0.37663	0.556123	0.441	0.491312	0.33413	0.461183	0.387431	0.575767
22	0.0552725	0.142032	0.122454	0.184909	0.0148068	0.0148068	0.12917	0.264795	0.107649	0.0181196	0.106608	0.0928899	0.53602	0.530023	0.430343	0.369922	0.39348	0.447792	0.511669	0.520093	0.593855	0.434203	0.36138	0.50792	0.419097	0.347966	0.543059	0.401471	0.455797	0.334832	0.462095	0.419513	0.615784
23	0.0676766	0.120188	0.115067	0.20707	0.0177156	0.0177156	0.124441	0.264891	0.122513	0.0166156	0.0825531	0.0902176	0.543124	0.51238	0.45018	0.35642	0.361542	0.426632	0.48359	0.497759	0.584307	0.436257	0.357617	0.454007	0.428375	0.358743	0.516536	0.419707	0.458287	0.296851	0.44222	0.390658	0.610538
24	0.0683455	0.121766	0.10003	0.231308	0.0341164	0.0341164	0.116017	0.244182	0.111699	0.0280493	0.0755645	0.0859817	0.540127	0.491552	0.407069	0.362549	0.383122	0.454169	0.477063	0.487974	0.588746	0.400191	0.344831	0.493925	0.392429	0.362481	0.525189	0.41634	0.450445	0.291648	0.442563	0.386947	0.613542
25	0.0753977	0.0689593	0.106401	0.171978	0.0313512	0.0313512	0.135083	0.245239	0.0916818	0.0429283	0.0712785	0.112717	0.530467	0.493353	0.427252	0.384219	0.366322	0.408535	0.476709	0.465655	0.565913	0.393052	0.327775	0.446961	0.388783	0.335984	0.510928	0.368101	0.449203	0.269411	0.448464	0.408999	0.588872
26	0.0602693	0.100683	0.107017	0.204436	0.0413775	0.0413775	0.145381	0.247797	0.0997419	0.0379157	0.0581075	0.0968573	0.523046	0.460914	0.398801	0.373133	0.368388	0.406917	0.462175	0.470599	0.54101	0.40571	0.33078	0.443511	0.383116	0.326584	0.505076	0.365094	0.434877	0.28704	0.451104	0.374211	0.577089
27	0.0325676	0.066335	0.0856992	0.181302	0.0533984	0.0533984	0.150472	0.253036	0.11104	0.0375417	0.0780175	0.0723192	0.509353	0.449762	0.403987	0.380553	0.37197	0.372466	0.491351	0.443844	0.563714	0.416819	0.339152	0.457623	0.366816	0.317194	0.501222	0.34244	0.431317	0.277693	0.411439	0.331802	0.571274
28	-0.0039062	0.0428932	0.0646734	0.149176	0.0625481	0.0625481	0.117583	0.254005	0.11053	0.0201107	0.0624764	0.0899255	0.517177	0.464421	0.421079	0.367788	0.310389	0.41166	0.474762	0.413278	0.52714	0.379839	0.29686	0.433229	0.375976	0.296987	0.468426	0.357564	0.413485	0.23499	0.416804	0.330583	0.562493
29	0.0359592	0.0463051	0.0935967	0.207923	0.0559491	0.0559491	0.133435	0.238167	0.109661	0.0278008	0.0764637	0.0690009	0.526817	0.43239	0.391361	0.35014	0.359956	0.392766	0.453399	0.424633	0.514265	0.399121	0.30254	0.423376	0.36725	0.288803	0.468819	0.323829	0.429651	0.244797	0.402676	0.342891	0.547849
30	0.0722721	0.050422	0.0897339	0.193196	0.0587885	0.0587885	0.117015	0.226775	0.0840081	0.0355404	0.0818472	0.0743368	0.550998	0.438261	0.413246	0.340593	0.354632	0.365267	0.444188	0.439613	0.528525	0.376969	0.293961	0.421995	0.354727	0.275437	0.470274	0.338532	0.421916	0.257823	0.403505	0.353018	0.544195
31	0.080613	0.057474	0.0829105	0.184957	0.0818288	0.0818288	0.112777	0.227158	0.0670727	0.0608747	0.0775018	0.0906352	0.517263	0.417079	0.389846	0.327765	0.344105	0.367734	0.445023	0.417112	0.522384	0.373358	0.270455	0.445258	0.365682	0.284216	0.451157	0.336805	0.399273	0.240821	0.380873	0.338072	0.552335
32	0.0950759	0.0538741	0.0750121	0.157605	0.0582927	0.0582927	0.10659	0.214511	0.073521	0.0254266	0.0602659	0.0682844	0.502116	0.418343	0.359895	0.313621	0.341998	0.367088	0.444503	0.387484	0.505834	0.39298	0.304049	0.41356	0.345927	0.278919	0.450172	0.314529	0.445643	0.263509	0.400995	0.331151	0.513135
33	0.0577208	0.0661334	0.0570432	0.155374	0.0763245	0.0763245	0.0855048	0.197334	0.0564277	0.0507181	0.0519906	0.0467442	0.490744	0.426726	0.369279	0.310513	0.293313	0.357066	0.424618	0.407848	0.483146	0.368152	0.273487	0.401098	0.336251	0.254064	0.4464	0.330017	0.377719	0.21983	0.370569	0.309575	0.481218
34	0.0299784	0.0249839	0.0719702	0.175257	0.0486902	0.0486902	0.0853653	0.200414	0.0782655	0.0290805	0.0523592	0.0424325	0.49116	0.410593	0.372125	0.326445	0.295327	0.342959	0.415438	0.404512	0.475133	0.36013	0.295179	0.376337	0.331245	0.240571	0.446989	0.324986	0.407616	0.233261	0.372603	0.322932	0.468657
35	0.0610335	0.0196777	0.0800577	0.148614	0.0443037	0.0443037	0.0878547	0.195778	0.0798554	0.0384632	0.0671434	0.0565966	0.485383	0.423011	0.362199	0.332811	0.298669	0.346401	0.396838	0.394556	0.489739	0.350986	0.257707	0.375455	0.335751	0.223417	0.42211	0.295965	0.417362	0.215316	0.375037	0.307862	0.493914
36	0.0328446	0.00245215	0.0516324	0.157805	0.0510357	0.0510357	0.0792399	0.197668	0.0799754	0.060944	0.0613115	0.0586576	0.472897	0.422023	0.360473	0.327032	0.280875	0.335514	0.386334	0.393923	0.437423	0.364057	0.250582	0.354718	0.339489	0.207575	0.414495	0.295081	0.38149	0.204198	0.348896	0.300066	0.488227
37	0.0420047	0.00510383	0.0688182	0.143795	0.0536172	0.0536172	0.0702544	0.197653	0.0893756	0.0206153	0.0578876	0.0424866	0.466028	0.399233	0.354454	0.303415	0.267362	0.362539	0.360174	0.388056	0.462937	0.344484	0.221589	0.338348	0.32963	0.222859	0.416619	0.302108	0.393463	0.202384	0.367004	0.280675	0.488613
38	0.0222339	0.0333975	0.0519308	0.116816	0.0595698	0.0595698	0.071573	0.19875	0.0685299	0.00531299	0.0520127	0.0512379	0.439256	0.377705	0.34557	0.285438	0.278379	0.314233	0.359886	0.348619	0.42189	0.363073	0.230216	0.33366	0.320241	0.20239	0.412165	0.350164	0.37947	0.191914	0.365963	0.272891	0.49377
39	0.015472	0.0412428	0.0586055	0.103829	0.0665873	0.0665873	0.0518675	0.201554	0.0671537	-0.0049831	0.0606804	0.0412629	0.453948	0.342292	0.360144	0.291715	0.285579	0.329292	0.353255	0.345512	0.413127	0.341638	0.238828	0.342253	0.320462	0.195993	0.409953	0.284859	0.374747	0.197004	0.339632	0.276333	0.458224
40	-0.0339076	0.0201494	0.0761486	0.103528	0.0688294	0.0688294	0.0377601	0.199437	0.0871804	0.0195337	0.0469883	0.0291111	0.438177	0.362557	0.364756	0.28558	0.266395	0.311584	0.334457	0.355601	0.41661	0.317029	0.240254	0.340612	0.32053	0.175965	0.388763	0.294645	0.358883	0.190541	0.368962	0.267667	0.490253
41	-0.0425029	0.0325889	0.0569147	0.116476	0.0811701	0.0811701	0.0449482	0.210541	0.0599684	0.00566569	0.0792629	0.0379903	0.417539	0.34136	0.350945	0.294174	0.263792	0.281945	0.332834	0.333184	0.416362	0.298919	0.226041	0.361872	0.31493	0.202369	0.406826	0.297917	0.368309	0.182087	0.327823	0.267471	0.435417
42	0.0241204	0.0324886	0.0517279	0.128741	0.0577093	0.0577093	0.0382134	0.179585	0.0694797	-0.0062917	0.0726342	0.0362519	0.422888	0.332373	0.346459	0.267677	0.263118	0.293331	0.316754	0.339899	0.409458	0.299345	0.218847	0.339261	0.309903	0.183796	0.379447	0.274725	0.36274	0.186251	0.32199	0.272342	0.416952
43	-0.0431586	0.00943865	0.0349052	0.154195	0.0598582	0.0598582	0.0669978	0.17695	0.0649686	-0.0150377	0.0900801	0.0397055	0.410703	0.317295	0.371	0.279732	0.272332	0.298962	0.31561	0.362254	0.427423	0.320913	0.193545	0.343546	0.296268	0.21579	0.397157	0.251803	0.373896	0.149623	0.327658	0.252776	0.443507
44	-0.0164163	0.0278654	0.0724314	0.117723	0.0770373	0.0770373	0.00778612	0.16056	0.0617204	-0.0227494	0.0944959	0.0136747	0.387211	0.304282	0.356477	0.24214	0.223243	0.324019	0.308551	0.375673	0.424526	0.297091	0.21727	0.32686	0.30379	0.204615	0.387875	0.273556	0.355367	0.176432	0.334407	0.27628	0.417801
45	0.033318	0.0354239	0.0627626	0.110315	0.0686493	0.0686493	0.0470601	0.161232	0.0501482	-0.0305778	0.0906935	0.0317562	0.384663	0.32887	0.367148	0.262235	0.238396	0.290916	0.306371	0.35609	0.388662	0.312156	0.228708	0.296082	0.295827	0.1884	0.375195	0.26504	0.384461	0.181248	0.299296	0.253376	0.389247
46	0.0159681	0.0188458	0.0480706	0.109642	0.0395735	0.0395735	0.0338875	0.156347	0.0569465	-0.020157	0.0561502	0.0382433	0.389986	0.322785	0.36661	0.264527	0.203083	0.308823	0.317157	0.361461	0.390098	0.295213	0.198947	0.323697	0.304617	0.18571	0.361697	0.254872	0.339056	0.154491	0.331782	0.2528	0.412821
47	0.0223737	0.0304238	0.0679101	0.0877776	0.0641069	0.0641069	0.0396981	0.149718	0.0595277	-0.0041104	0.0807589	0.0433383	0.386339	0.312264	0.349533	0.273377	0.234864	0.29113	0.301683	0.351001	0.413536	0.286145	0.205123	0.340475	0.284351	0.17792	0.356218	0.232141	0.352476	0.154513	0.288105	0.219473	0.401338
48	0.0416578	0.0468808	0.0541826	0.0699057	0.0732438	0.0732438	0.0430912	0.149499	0.0748249	0.0330966	0.052964	0.044424	0.373595	0.33696	0.351204	0.260789	0.223671	0.296999	0.334831	0.340491	0.424437	0.316019	0.220252	0.334656	0.295981	0.155147	0.36481	0.227074	0.342069	0.164102	0.30363	0.218669	0.405073
49	-0.005283	0.0694744	0.0461341	0.144572	0.0637721	0.0637721	0.0899756	0.15246	0.0547945	-0.011796	0.0704775	0.0542129	0.381533	0.353589	0.343767	0.259154	0.199541	0.285178	0.305699	0.3144	0.376913	0.30074	0.211147	0.320594	0.285986	0.165969	0.337606	0.270176	0.338087	0.171976	0.30595	0.221396	0.389023
50	-0.0111706	0.0136546	0.048986	0.0872591	0.0691868	0.0691868	0.0376382	0.156966	0.0643894	-0.0005678	0.0703862	0.0520727	0.37402	0.335621	0.338184	0.275589	0.20458	0.301483	0.327785	0.326527	0.387193	0.320855	0.215013	0.308393	0.29581	0.147461	0.351136	0.261923	0.331393	0.172559	0.293952	0.210036	0.421697
51	-0.0021861	0.0390354	0.0423346	0.094666	0.0829301	0.0829301	0.0364656	0.168504	0.0654581	0.00484764	0.062851	0.0596805	0.395479	0.327244	0.34364	0.257213	0.182716	0.289464	0.309734	0.300653	0.397972	0.2916	0.184704	0.297553	0.264066	0.160105	0.342893	0.252588	0.336778	0.146797	0.347673	0.198222	0.397986
52	-0.0196516	0.0508128	0.0484219	0.0748228	0.0457403	0.0457403	0.0179999	0.159138	0.0487105	0.0139472	0.0678452	0.0800366	0.384311	0.339891	0.337189	0.270079	0.161229	0.263833	0.29674	0.313096	0.387438	0.302207	0.198561	0.310831	0.289082	0.159176	0.346612	0.259672	0.317456	0.172361	0.258036	0.205512	0.437913
53	-0.0185722	0.0641724	0.0330333	0.102549	0.0522112	0.0522112	0.0377554	0.168943	0.0442413	0.0162381	0.049704	0.0547413	0.382578	0.336607	0.340879	0.271984	0.1837	0.267339	0.289636	0.311926	0.390728	0.304414	0.194575	0.281076	0.271965	0.196332	0.34981	0.256294	0.311111	0.148354	0.282615	0.199599	0.390839
54	0.00273269	0.0590147	0.0169368	0.073147	0.0565042	0.0565042	0.0192752	0.167517	0.0459815	0.0213849	0.0463749	0.0715775	0.362953	0.345376	0.356381	0.242324	0.183481	0.282347	0.293517	0.304985	0.357854	0.272905	0.207626	0.289497	0.278944	0.166176	0.326809	0.29122	0.298663	0.19019	0.282405	0.211304	0.378584
55	0.0141912	0.0728412	0.0410239	0.135884	0.0588528	0.0588528	0.0299056	0.153988	0.0495804	0.0119417	0.0540349	0.075808	0.362817	0.353263	0.342175	0.265162	0.204631	0.261812	0.288197	0.317241	0.368586	0.306866	0.197324	0.281843	0.279773	0.149237	0.338557	0.272751	0.316452	0.166774	0.276465	0.178813	0.372589
56	0.0109397	0.0583533	0.0438651	0.109611	0.0454772	0.0454772	0.03189	0.161048	0.0408222	0.0347255	0.0488098	0.0553612	0.346114	0.344702	0.35005	0.250914	0.190964	0.245594	0.267297	0.306468	0.373125	0.312717	0.172683	0.301729	0.277806	0.146554	0.324764	0.273932	0.313236	0.144999	0.280436	0.19077	0.392369
57	0.0577137	0.0731189	0.0448921	0.0882018	0.0580523	0.0580523	0.0230779	0.162251	0.0250995	0.0268054	0.0400372	0.044763	0.33538	0.344951	0.358141	0.240931	0.177431	0.253765	0.275246	0.295669	0.365436	0.274905	0.150626	0.29354	0.284026	0.15308	0.321003	0.290183	0.297442	0.135336	0.273201	0.161449	0.371216
58	0.0072905	0.054801	0.0438634	0.116058	0.0624445	0.0624445	0.00222106	0.147047	0.0302607	0.0529453	0.0500303	0.0594445	0.33924	0.34826	0.334122	0.244999	0.131103	0.231115	0.27996	0.299748	0.366804	0.29138	0.161488	0.29514	0.268447	0.160184	0.308053	0.277431	0.304898	0.138728	0.252726	0.189083	0.336377
59	0.0391857	0.0726108	0.044639	0.116487	0.0767576	0.0767576	0.00260919	0.169502	0.0329093	0.0357757	0.0399179	0.063536	0.325026	0.332051	0.361491	0.225279	0.161404	0.207953	0.252637	0.283256	0.353658	0.289781	0.17096	0.276473	0.244777	0.133125	0.30302	0.266508	0.304381	0.143451	0.256407	0.171568	0.340252
60	0.00657965	0.0807775	0.0481283	0.0934268	0.0912141	0.0912141	-0.0054949	0.15106	0.0195774	0.0322358	0.0480524	0.0537505	0.317862	0.33667	0.350204	0.227835	0.145702	0.212871	0.272038	0.2901	0.344462	0.310904	0.148817	0.29517	0.264299	0.147682	0.311568	0.330492	0.320638	0.141547	0.277201	0.178056	0.366853
61	-0.0155059	0.0526103	0.0402447	0.100268	0.0578063	0.0578063	0.00587105	0.153375	0.0323685	0.0337883	0.0484542	0.0689542	0.326086	0.331368	0.332081	0.225156	0.141797	0.211357	0.27655	0.299685	0.327496	0.26326	0.14879	0.283886	0.271417	0.128467	0.302158	0.29306	0.278765	0.132291	0.277634	0.166943	0.358427
62	-0.0186868	0.0711503	0.0464115	0.114084	0.0412634	0.0412634	0.0270273	0.135058	0.0295411	0.0235428	0.0671415	0.0812719	0.315521	0.318567	0.329901	0.229502	0.120175	0.183133	0.242942	0.300364	0.318912	0.274759	0.15735	0.281497	0.266697	0.139357	0.310775	0.309865	0.268475	0.153259	0.260398	0.17448	0.35097
63	-0.0190714	0.0772307	0.0441659	0.10409	0.0705509	0.0705509	0.0102375	0.126579	0.0114648	0.0480154	0.043259	0.0765755	0.304228	0.278341	0.332191	0.208007	0.104076	0.19862	0.259799	0.316523	0.309791	0.303426	0.156646	0.298053	0.253245	0.131645	0.271551	0.270562	0.284353	0.134162	0.279014	0.193485	0.32315
64	-0.0494938	0.0648393	0.0590059	0.0866366	0.0743313	0.0743313	-0.0113585	0.103572	0.0175924	0.054855	0.0385432	0.0713951	0.318657	0.274775	0.340236	0.194592	0.126955	0.204815	0.252318	0.299264	0.307209	0.26728	0.174647	0.277654	0.274338	0.115575	0.28411	0.272236	0.275317	0.151247	0.242315	0.168045	0.279551
65	-0.0039776	0.0535022	0.0641564	0.155247	0.0573015	0.0573015	0.0122051	0.111956	0.0224386	0.0602098	0.0417915	0.069582	0.299831	0.285016	0.313617	0.189883	0.136553	0.200487	0.255046	0.289345	0.276297	0.31845	0.160747	0.260642	0.270206	0.126867	0.280576	0.314801	0.257063	0.144204	0.245264	0.17916	0.317023
66	-0.00795	0.0765103	0.0548962	0.114742	0.0583437	0.0583437	-0.0079558	0.12275	0.0332759	0.0398857	0.0597075	0.0626033	0.297744	0.295467	0.288391	0.191764	0.11692	0.20269	0.244321	0.285915	0.297586	0.273048	0.146703	0.282805	0.266995	0.128164	0.266641	0.26531	0.284348	0.129297	0.265365	0.182608	0.323003
67	-0.0198386	0.0758422	0.0669372	0.125095	0.0469731	0.0469731	0.0173133	0.121155	0.00869618	0.0417599	0.0541224	0.0759028	0.317505	0.271904	0.301626	0.197995	0.126518	0.178621	0.233933	0.307362	0.297807	0.270438	0.155667	0.276595	0.292696	0.11195	0.260235	0.230738	0.244802	0.137038	0.231593	0.182616	0.359197
68	-0.0087002	0.0895179	0.0569846	0.132938	0.0527008	0.0527008	0.0265711	0.105338	0.00215525	0.0508448	0.0713245	0.0642626	0.324045	0.277566	0.302284	0.176928	0.143062	0.179072	0.22303	0.31745	0.31677	0.25667	0.147782	0.289529	0.274483	0.116889	0.245443	0.262523	0.270853	0.111641	0.254051	0.170473	0.33122
69	-0.0117202	0.0864102	0.0382947	0.144791	0.0254021	0.0254021	0.0387423	0.131179	0.0200589	0.0141811	0.0581831	0.0700317	0.319772	0.257654	0.279804	0.180156	0.134452	0.176018	0.234618	0.307459	0.307825	0.244184	0.109758	0.272851	0.268509	0.116749	0.248962	0.266931	0.23497	0.102888	0.257097	0.159116	0.336284
70	0.00937268	0.0882164	0.0377785	0.0798208	0.0125349	0.0125349	0.0211034	0.112238	-0.0112755	0.0285694	0.0327224	0.0819651	0.306616	0.266992	0.263718	0.185887	0.102671	0.178501	0.208421	0.306622	0.309723	0.228375	0.093014	0.249519	0.261375	0.116277	0.250344	0.274964	0.263187	0.084289	0.249491	0.14408	0.334613
71	0.0113314	0.0611669	0.0396209	0.119289	0.00909213	0.00909213	0.0738171	0.121166	0.00359248	0.0334928	0.044743	0.0807598	0.301172	0.284444	0.249437	0.198431	0.141789	0.193357	0.216741	0.320688	0.32637	0.261759	0.116955	0.259624	0.268523	0.112223	0.23296	0.215233	0.257351	0.103473	0.241946	0.129147	0.312075
72	-0.0047262	0.0760692	0.0334959	0.160301	0.00724761	0.00724761	0.0412369	0.122086	0.00192501	0.0394256	0.0605424	0.0659441	0.291895	0.275224	0.243898	0.201924	0.133625	0.186995	0.198282	0.312958	0.277193	0.254586	0.114805	0.235201	0.261639	0.0996651	0.253983	0.20294	0.264185	0.119581	0.226505	0.147518	0.278485
73	-0.0420106	0.0900748	0.0478118	0.138201	-0.013931	-0.013931	0.025104	0.125114	0.00655268	0.0545617	0.0415671	0.0517804	0.293999	0.279679	0.266366	0.183046	0.131325	0.166575	0.205455	0.312263	0.297381	0.267304	0.117595	0.241632	0.272896	0.109776	0.258805	0.246916	0.262142	0.0786064	0.222303	0.110286	0.294834
74	-0.0265387	0.0514246	0.048321	0.13874	-0.0010938	-0.0010938	0.0506239	0.118956	-0.0012302	0.0222791	0.052895	0.0631755	0.278865	0.28397	0.272038	0.179907	0.137388	0.169154	0.181174	0.299986	0.294328	0.260682	0.126862	0.251123	0.254516	0.119825	0.251333	0.239772	0.261988	0.108947	0.234879	0.144994	0.325814
75	-0.004899	0.0607716	0.0272384	0.167001	-0.0120947	-0.0120947	0.0180335	0.108816	0.00449315	0.065712	0.0318522	0.0698215	0.294895	0.274257	0.276136	0.158085	0.111897	0.180473	0.189288	0.296478	0.331397	0.268797	0.106817	0.254081	0.27379	0.11083	0.244433	0.215164	0.251026	0.105683	0.223918	0.142552	0.326122
76	-0.0397298	0.0690419	0.0369307	0.145808	-0.0232054	-0.0232054	0.0274702	0.102041	0.0191426	0.0525234	0.0305442	0.0557031	0.291334	0.271124	0.268715	0.153854	0.0784321	0.167404	0.181243	0.317826	0.313633	0.261708	0.118789	0.282821	0.231649	0.0917093	0.251789	0.201817	0.274626	0.110959	0.233452	0.138088	0.335516
77	-0.002135	0.109229	0.0451942	0.146715	-0.019207	-0.019207	0.0388347	0.130375	0.0113848	0.0345967	0.0485011	0.062057	0.298883	0.283687	0.254203	0.158473	0.10003	0.182795	0.181653	0.316441	0.333727	0.270373	0.0814012	0.282587	0.212771	0.119125	0.257469	0.219022	0.258146	0.078918	0.226312	0.140767	0.330772
78	-0.0119507	0.0878249	0.0269127	0.146302	-0.001995	-0.001995	0.0508002	0.136456	0.0128181	0.0685477	0.0369668	0.0466242	0.290056	0.272878	0.271057	0.176669	0.100824	0.14197	0.174601	0.316367	0.321497	0.257883	0.0881762	0.304637	0.233719	0.0964599	0.238096	0.223132	0.253051	0.0811656	0.212607	0.144039	0.32605
79	-0.0204202	0.101378	0.028597	0.149243	-0.002248	-0.002248	0.0291149	0.129918	0.0254683	0.062795	0.0327042	0.0328496	0.284282	0.24762	0.263583	0.204167	0.0978089	0.127244	0.163567	0.30095	0.309763	0.254587	0.0928057	0.259287	0.223347	0.0970446	0.241155	0.191695	0.244686	0.103492	0.235319	0.128606	0.34616
80	-0.0299244	0.106168	0.00544476	0.129725	-0.0241875	-0.0241875	0.0422457	0.133518	0.0438723	0.0280057	0.0541161	0.0230436	0.276347	0.265817	0.24562	0.203829	0.105377	0.150637	0.162	0.308071	0.298137	0.244872	0.0894131	0.266536	0.22603	0.0897283	0.225872	0.192965	0.232017	0.0936771	0.190036	0.127935	0.275379
81	-0.053273	0.0934203	0.0330433	0.124069	-0.0175608	-0.0175608	0.029173	0.133352	0.0464755	0.00261474	0.0345118	0.0324297	0.26344	0.271228	0.26974	0.204806	0.0868561	0.154834	0.170191	0.301607	0.313852	0.202511	0.0963891	0.227344	0.219994	0.0829761	0.240995	0.183662	0.22753	0.0943883	0.222818	0.134769	0.32651
82	-0.056388	0.101466	0.0247312	0.151774	-0.03356	-0.03356	0.046535	0.112141	0.0292416	0.0557646	0.0237853	0.0494891	0.268329	0.27082	0.254392	0.213406	0.0591463	0.223713	0.17403	0.273382	0.307674	0.268219	0.0736181	0.223292	0.238548	0.0910501	0.244423	0.237629	0.224467	0.0599898	0.208679	0.131412	0.315499
83	-0.027527	0.119817	0.0278754	0.172639	-0.0582593	-0.0582593	0.0403261	0.133712	0.0313612	0.0313135	0.0530533	0.0367738	0.278773	0.276655	0.212816	0.214157	0.0949956	0.197368	0.163771	0.301948	0.30269	0.233579	0.0798242	0.243965	0.228411	0.100766	0.242408	0.1978	0.23024	0.0939535	0.213648	0.119526	0.271278
84	-0.0266079	0.105758	0.0103858	0.198084	-0.0578953	-0.0578953	0.0274149	0.133424	0.0436227	0.0225409	0.0264538	0.0434355	0.279382	0.277808	0.223432	0.239927	0.1034	0.202766	0.158964	0.284087	0.305951	0.254523	0.0820274	0.234032	0.209022	0.0790665	0.247566	0.21765	0.239984	0.0759307	0.195976	0.110412	0.294089
85	0.0130467	0.106158	0.0265493	0.178938	-0.049198	-0.049198	0.0282906	0.127675	0.0307612	0.0214287	0.0515516	0.0439168	0.294006	0.261083	0.267489	0.223578	0.0786577	0.212569	0.16775	0.291642	0.291634	0.262757	0.0801862	0.245825	0.219538	0.102988	0.248883	0.204345	0.22726	0.0647297	0.200883	0.101364	0.269017
86	0.0202309	0.104208	0.0211339	0.148525	-0.0671799	-0.0671799	0.00516204	0.101423	0.0208634	0.0153645	0.0516569	0.0418593	0.269537	0.256368	0.265436	0.212994	0.0637171	0.184965	0.166797	0.283475	0.298467	0.2562	0.106927	0.23202	0.223602	0.092753	0.226278	0.206182	0.237983	0.0885752	0.198047	0.153365	0.307387
87	0.0004397	0.111922	0.00905252	0.145261	-0.0597315	-0.0597315	0.017955	0.118807	0.00670783	0.00031268	0.0293396	0.0172769	0.283775	0.271022	0.255925	0.227277	0.0607261	0.212228	0.140607	0.292622	0.285603	0.248372	0.0966275	0.244566	0.218968	0.107318	0.241869	0.229187	0.235227	0.0854539	0.205379	0.123455	0.317063
88	-0.0182527	0.0867235	0.0150616	0.128994	-0.0757487	-0.0757487	0.00990244	0.111815	0.0293614	-0.0090473	0.0198238	0.0458059	0.282259	0.273581	0.25402	0.238353	0.066136	0.161197	0.136187	0.310214	0.300166	0.243913	0.0945756	0.207079	0.2129	0.0869199	0.237355	0.17136	0.214042	0.0650023	0.187878	0.140311	0.264448
89	0.0424144	0.112125	0.00996148	0.162611	-0.0415747	-0.0415747	0.0162989	0.136452	0.0221859	0.00525961	0.0297131	0.0459056	0.259847	0.274789	0.243683	0.208312	0.0622711	0.184936	0.168763	0.307936	0.301913	0.241328	0.0577135	0.260273	0.217322	0.0909987	0.237602	0.133469	0.232701	0.067911	0.191793	0.101316	0.267702
90	0.026735	0.102995	0.0168311	0.156812	-0.054509	-0.054509	0.0351551	0.127834	0.0406169	-0.0059765	0.0371959	0.0611001	0.277993	0.290618	0.237449	0.213447	0.0538707	0.157625	0.14763	0.316336	0.287712	0.213253	0.0956785	0.235692	0.183288	0.093663	0.230649	0.179555	0.22365	0.104631	0.179734	0.122803	0.260233
91	0.0164649	0.0859913	0.0160115	0.163934	-0.0789842	-0.0789842	0.0203948	0.127232	0.0209033	-0.0100948	0.0536551	0.0371928	0.28303	0.26549	0.250542	0.234819	0.0572879	0.179256	0.154717	0.306894	0.310973	0.255497	0.0988073	0.209736	0.206401	0.0567942	0.225122	0.196518	0.242663	0.0915657	0.211575	0.0911164	0.286803
92	-0.0067064	0.0701865	0.0507403	0.155715	-0.070834	-0.070834	0.0126671	0.12123	0.0184636	0.0149216	-0.0016353	0.047027	0.276957	0.273764	0.239771	0.23835	0.0614704	0.172136	0.169289	0.298218	0.306778	0.217503	0.104096	0.217692	0.211432	0.0703779	0.231785	0.164854	0.220734	0.0970992	0.210327	0.126821	0.279187
93	0.00310689	0.0692822	0.0399268	0.146231	-0.0755574	-0.0755574	0.0320401	0.118753	0.00806699	-0.0245945	0.0421952	0.0417495	0.270953	0.27864	0.253766	0.22399	0.0845243	0.136569	0.163524	0.311183	0.281114	0.216795	0.0923394	0.220448	0.207859	0.0761606	0.22886	0.173288	0.226821	0.100722	0.158254	0.102283	0.30172
94	-0.0041722	0.0888579	0.0404013	0.157588	-0.0449864	-0.0449864	0.00786425	0.105375	0.0237221	0.00133167	0.027248	0.0538544	0.258054	0.29623	0.234467	0.22594	0.0706925	0.167991	0.158119	0.321587	0.308184	0.228019	0.0693063	0.223058	0.222635	0.0823037	0.206046	0.127966	0.229251	0.0812995	0.184238	0.113553	0.284813
95	0.0314632	0.0784922	0.0238329	0.186452	-0.0239272	-0.0239272	-0.0021305	0.109904	0.0115789	-0.0067464	0.0364631	0.0445042	0.277582	0.27243	0.225493	0.2354	0.0702947	0.180123	0.168295	0.327008	0.297497	0.221711	0.0775063	0.238216	0.204241	0.0796384	0.22573	0.155425	0.234885	0.0898127	0.150998	0.098414	0.268314
96	0.00410243	0.0790835	0.0208546	0.159406	-0.0306985	-0.0306985	-0.0225732	0.0973325	0.00391046	0.00377471	0.0439573	0.044654	0.276242	0.274248	0.216892	0.192877	0.0809903	0.18051	0.169975	0.326542	0.306425	0.235833	0.0667374	0.237109	0.215774	0.0798673	0.21705	0.154841	0.230782	0.0884635	0.138668	0.104022	0.28494
97	-0.0342017	0.0858889	0.00969261	0.116925	-0.0349864	-0.0349864	0.0185576	0.0943929	0.0101132	-0.0190398	0.0471641	0.0663569	0.279317	0.279871	0.186437	0.193698	0.0734631	0.189714	0.153358	0.323398	0.290084	0.236406	0.0540083	0.273906	0.206673	0.0670905	0.208304	0.116983	0.2407	0.0662084	0.176756	0.106252	0.280983
98	-0.0462113	0.0845177	0.0271987	0.132498	-0.0195202	-0.0195202	0.00090813	0.0824176	-0.0081696	-0.0072785	0.0277617	0.052415	0.262545	0.267844	0.215051	0.198283	0.0400789	0.212706	0.159633	0.322561	0.298306	0.216524	0.0651403	0.242658	0.23024	0.0656878	0.202646	0.143595	0.231792	0.0825045	0.199875	0.0728862	0.273953
99	-0.0017001	0.0715491	0.021414	0.117244	-0.030501	-0.030501	0.00456556	0.085386	0.0177481	0.00348965	0.0504374	0.0731278	0.267944	0.247149	0.230163	0.197519	0.0591032	0.189315	0.169832	0.325206	0.283749	0.226634	0.0823831	0.220945	0.225632	0.0591883	0.19842	0.161318	0.221392	0.0948133	0.181919	0.0810782	0.256153
100	-0.0174745	0.0963489	0.0443736	0.0869281	-0.0211867	-0.0211867	0.00773847	0.083677	0.0141397	-0.0123704	0.0246506	0.0459043	0.282466	0.25269	0.233109	0.173634	0.0668003	0.192024	0.167909	0.324059	0.268146	0.189441	0.0445661	0.224577	0.229362	0.0769603	0.192894	0.175823	0.217861	0.0784766	0.168982	0.0861911	0.285988
101	-0.0117848	0.114619	0.020453	0.101142	-0.0291313	-0.0291313	-0.0072835	0.0931799	0.00314345	-0.015502	0.0190065	0.0550539	0.273982	0.245482	0.235986	0.206615	0.073178	0.195129	0.160345	0.355027	0.244429	0.208041	0.0477256	0.213548	0.222583	0.0549718	0.176033	0.168543	0.190538	0.0940516	0.171662	0.0677118	0.261878
102	0.00258421	0.107379	0.00488756	0.110543	-0.0280541	-0.0280541	-0.0018582	0.0948502	0.0049377	-0.0140438	0.0494135	0.0487086	0.264084	0.271592	0.235361	0.174537	0.0507306	0.185399	0.172327	0.324531	0.276961	0.18461	0.0338498	0.226924	0.205022	0.0719728	0.203816	0.17907	0.205964	0.0710164	0.169614	0.0546128	0.284123
103	-0.0124726	0.0816784	0.0289503	0.108854	-0.0082857	-0.0082857	-0.0250251	0.0946572	0.0306778	-0.0005908	0.032294	0.0532778	0.265491	0.262975	0.225275	0.168597	0.0687166	0.218614	0.162033	0.312214	0.310422	0.196934	0.047642	0.239251	0.206717	0.0473162	0.18442	0.162608	0.212686	0.0801026	0.147458	0.0639621	0.310788
104	0.00510365	0.0747429	0.030213	0.0878698	-0.0298991	-0.0298991	-0.026056	0.0878996	-0.0053643	0.00849579	0.0674084	0.0436593	0.277813	0.255659	0.248467	0.174783	0.0492694	0.190482	0.164579	0.338151	0.291063	0.204547	0.0347502	0.233221	0.218123	0.0734072	0.182264	0.170626	0.227422	0.0619776	0.158679	0.0696941	0.30965
105	0.00544254	0.0819958	0.061781	0.0514434	-0.0355614	-0.0355614	-0.0264569	0.0851353	0.0138632	0.0137263	0.0333381	0.0508261	0.270135	0.265456	0.243022	0.181727	0.0534997	0.20673	0.147639	0.318316	0.284226	0.184554	0.0677593	0.241596	0.202651	0.0937408	0.189545	0.123326	0.231869	0.0947211	0.190923	0.0890157	0.280116
106	0.0100089	0.0827978	0.0414296	0.0434108	-0.0220402	-0.0220402	-0.0282532	0.0877643	0.0271105	-0.0050312	0.0244855	0.0237243	0.284998	0.246464	0.228512	0.191595	0.0276499	0.206892	0.162908	0.327374	0.272574	0.187949	0.0741704	0.232512	0.194086	0.066397	0.171547	0.107968	0.241996	0.0894639	0.141739	0.0530867	0.269249
107	0.0151091	0.0646463	0.0420066	0.0278063	-0.0170488	-0.0170488	-0.0380053	0.0678227	-0.005888	0.00312839	0.0426875	0.033743	0.26951	0.238919	0.247338	0.172929	0.0604859	0.211022	0.136821	0.328398	0.277416	0.1901	0.0432175	0.22353	0.209889	0.0678245	0.174995	0.123886	0.249014	0.0720503	0.16487	0.0673003	0.286958
108	0.00496862	0.0879568	0.0165414	0.0430697	-0.0336355	-0.0336355	-0.0243241	0.0538359	0.0124876	-0.0121196	0.0124553	0.019085	0.284256	0.24068	0.231695	0.180879	0.0485549	0.213827	0.168323	0.302279	0.248348	0.236116	0.0537175	0.222648	0.235057	0.0658387	0.195711	0.125525	0.252855	0.063453	0.153907	0.0521589	0.276015
109	0.0167936	0.0835232	0.0552816	0.0715239	0.0157286	0.0157286	-0.023963	0.0665859	0.00929744	-0.0108402	0.0260133	0.0132523	0.258629	0.237683	0.22633	0.187499	0.0375627	0.215761	0.145679	0.296774	0.286502	0.2232	0.0568647	0.20398	0.215036	0.0719895	0.183215	0.122771	0.255484	0.0704655	0.160393	0.0532698	0.293741
110	-0.0140438	0.110187	0.0239345	0.0732688	0.00160919	0.00160919	0.0128338	0.0729776	-0.0156644	0.0111334	0.0068119	-0.0144191	0.263332	0.229328	0.225276	0.179023	0.0362909	0.195011	0.16421	0.318443	0.290457	0.18497	0.0494856	0.215523	0.235916	0.0643418	0.200343	0.119575	0.220627	0.0628005	0.138107	0.0513336	0.27551
111	0.0120638	0.0711938	0.017314	0.0451684	0.00832204	0.00832204	-0.0099242	0.0679854	-0.0101037	-0.0071087	0.0289622	-0.0099186	0.258828	0.228847	0.237639	0.167701	0.0592378	0.204579	0.162024	0.306269	0.284723	0.205698	0.0403117	0.210976	0.207855	0.0804995	0.179532	0.108374	0.239776	0.0453193	0.148154	0.0498029	0.266709
112	0.0294813	0.0973858	0.0242764	0.0383224	-0.0145659	-0.0145659	-0.0026741	0.0850313	-0.0031069	-0.0336486	0.0165159	0.00633386	0.260905	0.212441	0.264704	0.180581	0.052237	0.167356	0.137586	0.297656	0.28622	0.180723	0.0406844	0.188249	0.220981	0.0753248	0.18915	0.0879579	0.233405	0.06516	0.128758	0.0579706	0.21839
113	0.0004201	0.118993	0.021624	0.0349813	-0.0031148	-0.0031148	-0.0156247	0.0832192	-0.0059698	-0.0025143	0.0431239	-0.0026743	0.220306	0.199336	0.223964	0.175234	0.0369185	0.176144	0.109811	0.274504	0.294737	0.167603	0.0516742	0.178925	0.21608	0.101	0.190115	0.120749	0.259721	0.0559817	0.142746	0.0747642	0.282268
114	-0.0020889	0.107922	0.0239038	0.0886488	0.00881023	0.00881023	-0.0089205	0.0591581	-0.006006	0.00469855	0.0455049	-0.0086773	0.224354	0.19037	0.188463	0.165086	0.0511899	0.163199	0.119786	0.271088	0.29625	0.170919	0.0339999	0.173287	0.212213	0.0804445	0.169532	0.0890267	0.235858	0.0405704	0.134199	0.073387	0.264766
115	0.0302622	0.120123	0.00491612	0.0670359	0.00559852	0.00559852	-0.0192648	0.061478	-0.0131227	-0.0171905	0.0395143	0.00904171	0.221667	0.201392	0.206536	0.179132	0.056251	0.167549	0.113574	0.288924	0.280231	0.173624	0.0406116	0.225409	0.227324	0.0952653	0.173841	0.131955	0.240284	0.0576337	0.118414	0.0644119	0.267832
116	0.00197849	0.10796	-0.0040774	0.0876791	0.00633682	0.00633682	-0.0182708	0.0670061	-0.0097552	-0.0183369	0.0501833	-0.0164114	0.234349	0.17019	0.210759	0.181068	0.0359084	0.193896	0.112651	0.301406	0.309899	0.162465	0.0528521	0.220016	0.232751	0.119119	0.186868	0.135754	0.212766	0.0618085	0.142175	0.0595118	0.244933
117	0.0411552	0.111914	-0.0027919	0.0845315	0.0223112	0.0223112	-0.0129472	0.0742582	-0.0131629	-0.0111277	0.0232865	-0.0001033	0.235154	0.201361	0.214331	0.193915	0.0575102	0.193493	0.108842	0.289213	0.278719	0.131806	0.0370546	0.202371	0.239053	0.0695725	0.178127	0.134319	0.219457	0.0484397	0.144535	0.053118	0.233165
118	0.0148892	0.127803	0.00485489	0.0683819	-0.0072479	-0.0072479	-0.0233785	0.0887832	-0.0099473	-0.0477203	0.0265961	-0.0071782	0.250309	0.176869	0.201719	0.192576	0.0521609	0.164524	0.11403	0.286694	0.288132	0.167167	0.0468826	0.20354	0.247851	0.0823679	0.176009	0.165304	0.215741	0.068361	0.125972	0.0463472	0.256573
119	0.00728328	0.119669	0.00311344	0.0597351	0.00050078	0.00050078	-0.0387787	0.0851941	0.00793717	-0.0365082	0.0132587	0.0135401	0.234749	0.170969	0.207982	0.194066	0.0255009	0.139221	0.110154	0.292409	0.300081	0.180295	0.0404907	0.22189	0.235655	0.058575	0.167951	0.0900847	0.2311	0.0514788	0.128112	0.040796	0.223098
120	0.0155173	0.118515	-0.0021586	0.0733805	0.0306498	0.0306498	-0.0296035	0.0805841	-0.0076749	-0.0408503	0.0184791	0.00055879	0.242494	0.150474	0.206979	0.193973	0.0436129	0.150102	0.111975	0.280353	0.272181	0.186718	0.0268875	0.223709	0.20982	0.0869576	0.168548	0.14052	0.228097	0.0465938	0.136501	0.0474045	0.22101
121	-0.0324935	0.127941	0.0088274	0.0887424	0.0433895	0.0433895	-0.0119494	0.074601	-0.0160024	-0.026146	0.0204237	0.012302	0.225279	0.155442	0.19601	0.1863	0.0295021	0.142746	0.11412	0.281332	0.27944	0.153415	0.0401643	0.192279	0.213949	0.0816697	0.175463	0.122983	0.227927	0.053325	0.121243	0.0490877	0.268175
122	-0.0114007	0.098347	0.0147758	0.110732	0.0342324	0.0342324	-0.0216587	0.058382	-0.0192833	-0.034704	-0.0016	-0.0012617	0.238081	0.166563	0.203391	0.176537	0.0117475	0.173222	0.108124	0.296474	0.31898	0.163571	0.0085598	0.18231	0.232659	0.0954625	0.179148	0.157029	0.241374	0.0292537	0.134348	0.0579636	0.262588
123	-0.0532722	0.0819684	0.0138936	0.0870326	0.0058477	0.0058477	-0.0228365	0.0805995	0.0103038	-0.0423368	0.0292373	0.0118798	0.246374	0.17527	0.19019	0.170841	0.00941684	0.153094	0.110465	0.315517	0.290955	0.166747	0.0458647	0.186111	0.221697	0.0999654	0.154436	0.119629	0.206099	0.05476	0.122248	0.0579433	0.239326
124	-0.0346077	0.0973019	-0.0203746	0.100041	0.0260878	0.0260878	-0.0419419	0.0699481	-0.0020138	-0.0392463	0.0275217	0.0193583	0.223885	0.20484	0.218826	0.148049	0.0376474	0.16574	0.111331	0.317647	0.323221	0.156896	0.0190209	0.178481	0.222016	0.104688	0.159924	0.145836	0.224442	0.0463469	0.174672	0.0487743	0.192004
125	0.0207074	0.104448	0.00857771	0.0914369	0.028914	0.028914	-0.0205846	0.0684608	-0.0100215	-0.0269332	0.0468683	0.00923442	0.232079	0.195497	0.166334	0.1593	0.00630891	0.122532	0.108633	0.307295	0.284282	0.173573	0.0386966	0.197779	0.251112	0.0965616	0.154141	0.0754329	0.226506	0.0493892	0.114451	0.0485346	0.225571
126	0.00940388	0.0910374	0.0100445	0.100189	0.0118739	0.0118739	0.00146542	0.0885194	-0.0372803	-0.0374689	0.044753	0.00063984	0.244822	0.194721	0.201571	0.166482	0.0141884	0.155719	0.115983	0.328864	0.277855	0.164586	0.0190695	0.171328	0.197243	0.0939237	0.145971	0.0928027	0.212965	0.0355442	0.154395	0.0538088	0.277413
127	0.00974967	0.0906818	0.00718813	0.0959412	0.004661	0.004661	-0.0182933	0.066161	-0.0157282	-0.0429406	0.0394723	0.0121431	0.235	0.194746	0.191473	0.200663	0.0126782	0.129654	0.122753	0.286907	0.295732	0.160906	0.034464	0.160827	0.240999	0.0658812	0.155831	0.120435	0.223381	0.0544738	0.130059	0.0615026	0.213736
128	-0.045112	0.087492	0.0187527	0.114125	0.0175567	0.0175567	-0.0226352	0.0758463	-0.0324588	-0.0531653	0.0384727	0.00907908	0.224113	0.182254	0.162988	0.172636	0.0352066	0.165386	0.129331	0.283521	0.303798	0.18308	0.00736562	0.152166	0.212437	0.0942078	0.156831	0.0989402	0.215429	0.0429131	0.128546	0.0478197	0.256407
129	-0.0528403	0.105346	0.0037758	0.0804629	0.0174211	0.0174211	-0.0341775	0.0751968	-0.0136382	-0.0316491	0.01591	0.020296	0.236931	0.180368	0.192526	0.197377	0.0413972	0.129309	0.125599	0.272762	0.2816	0.133426	0.0369826	0.157998	0.236383	0.0796158	0.142985	0.105079	0.19675	0.0509703	0.0941146	0.0336769	0.225674
130	0.00724959	0.114103	-0.0241104	0.117485	0.025765	0.025765	-0.0256824	0.0749029	-0.0162787	-0.0501114	0.0234283	0.024465	0.237882	0.186991	0.177088	0.17773	0.0200129	0.139577	0.137643	0.25671	0.285446	0.160495	0.0384339	0.15951	0.230826	0.0957681	0.134138	0.155322	0.238301	0.0503202	0.133272	0.0620722	0.211867
131	-0.0163071	0.106376	0.00062243	0.0652528	0.0121361	0.0121361	-0.0432955	0.0721237	-0.0096473	-0.060529	0.0301023	-0.007719	0.235986	0.174214	0.168365	0.215038	0.0154446	0.151455	0.111415	0.245122	0.311888	0.163275	0.00944374	0.167277	0.216714	0.100003	0.130794	0.104066	0.20572	0.0247435	0.111637	0.0467657	0.22727
132	-0.0009204	0.092833	-0.0149383	0.0610965	0.00416821	0.00416821	-0.0446046	0.0672364	-0.024506	-0.0006646	0.0409361	0.011277	0.220726	0.170007	0.199394	0.194904	0.0307862	0.177948	0.138615	0.259374	0.285805	0.189456	-0.012561	0.168267	0.18776	0.0958867	0.118294	0.132051	0.205359	0.0100399	0.153367	0.0630504	0.254857
133	0.0065238	0.0871227	0.00045515	0.039438	0.0215576	0.0215576	-0.0481659	0.0945751	-0.0304727	-0.0178425	0.0488174	0.0175869	0.213766	0.176009	0.20295	0.17919	0.0222539	0.193829	0.120832	0.256164	0.297142	0.155955	-0.003456	0.166278	0.202326	0.0678081	0.151366	0.111407	0.207617	0.0201688	0.135834	0.0499716	0.203963
134	0.0156725	0.0715047	0.00698777	0.0716039	-0.0039301	-0.0039301	-0.0462292	0.0921039	-0.0221437	-0.0407818	0.0358426	0.0339728	0.219928	0.20894	0.178423	0.177149	0.0236939	0.15945	0.125753	0.245056	0.283936	0.158559	-0.000718608	0.198085	0.195185	0.087591	0.124247	0.0538542	0.218619	0.0239333	0.150665	0.0832428	0.230613
135	0.0533409	0.0685456	2.0672e-05	0.106149	-0.0030419	-0.0030419	-0.0352789	0.08647	-0.0159497	-0.0286685	0.0291589	0.0262814	0.210562	0.202013	0.177598	0.177631	0.0310037	0.145036	0.153986	0.245719	0.276311	0.131819	0.00900983	0.191179	0.212852	0.0784558	0.128311	0.0857271	0.225254	0.0329271	0.109744	0.0715254	0.212883
136	0.00574335	0.0744185	-0.0013462	0.116293	-0.0121836	-0.0121836	-0.0253404	0.09164	-0.0102109	-0.0286527	0.0476622	0.0520818	0.234981	0.187939	0.184035	0.163136	0.0651167	0.154676	0.12737	0.229286	0.282985	0.157485	0.00892779	0.157323	0.208084	0.0778829	0.126849	0.0968888	0.213899	0.0273666	0.112448	0.0447099	0.188389
137	0.00043516	0.0937483	0.0105519	0.0859606	-0.019979	-0.019979	-0.0540495	0.0755368	-0.0135252	-0.0239719	0.0517213	0.0377808	0.209616	0.19505	0.162729	0.18227	0.0404264	0.142679	0.154881	0.221906	0.252097	0.129237	0.0274406	0.163709	0.201203	0.0822279	0.112248	0.111762	0.213228	0.0348397	0.0818671	0.0529438	0.206348
138	-0.0231258	0.0665906	-0.0025001	0.0776454	0.00243597	0.00243597	-0.0593209	0.0803545	-0.0330219	-0.0275252	0.0268605	0.0190391	0.215769	0.195047	0.16987	0.180509	0.0105697	0.166556	0.15701	0.238325	0.26167	0.150581	0.0240411	0.192263	0.2338	0.0602475	0.125291	0.105074	0.21886	0.0245261	0.0814329	0.0522545	0.225462
139	-0.0168095	0.0807504	-0.0055927	0.0664749	0.00643593	0.00643593	-0.053699	0.0937695	-0.0297754	-0.0412983	0.0340493	0.0291577	0.190501	0.204936	0.165372	0.185041	0.0382789	0.152498	0.161727	0.245847	0.285022	0.164034	0.0121411	0.166957	0.210851	0.0909756	0.120651	0.0873972	0.210079	0.0343002	0.114357	0.0743935	0.203137
140	-0.0308863	0.0965994	0.0272444	0.0421062	0.0215753	0.0215753	-0.0514369	0.0884697	-0.0390974	-0.0065109	0.050649	0.0133229	0.201565	0.19253	0.16095	0.172108	-0.00867489	0.138148	0.162737	0.268187	0.29008	0.148985	0.0392896	0.173354	0.222564	0.0893824	0.138382	0.0940078	0.198261	0.0420696	0.142141	0.0437546	0.22007
141	0.00163125	0.0827928	0.0081323	0.0684859	0.0276895	0.0276895	-0.0762451	0.0802586	-0.002311	-0.0241905	0.0289438	-0.004358	0.170406	0.201851	0.169125	0.172858	0.042621	0.103803	0.16417	0.281612	0.255835	0.158733	0.0458807	0.151002	0.210818	0.0752574	0.125408	0.0947374	0.218961	0.03254	0.122372	0.0494217	0.231489
142	-0.0291323	0.103973	-0.0019572	0.0816306	0.0249134	0.0249134	-0.0855838	0.0759938	-0.0138862	0.00710162	0.0284691	0.0110028	0.187599	0.208086	0.16165	0.163924	0.0570473	0.147763	0.185851	0.266114	0.25179	0.144146	0.030908	0.175781	0.213327	0.0903398	0.123663	0.104197	0.231044	0.0313201	0.103211	0.0478844	0.191655
143	-0.002736	0.0857013	-0.0086919	0.0429259	0.0233617	0.0233617	-0.07945	0.0649807	-0.0269824	0.0007255	0.0205129	0.00347008	0.18793	0.199706	0.190896	0.165268	0.0295679	0.138256	0.187682	0.247496	0.282524	0.159151	0.0245204	0.181681	0.209285	0.0897925	0.147508	0.130121	0.205288	0.0161056	0.115803	0.0301621	0.224223
144	-0.0257676	0.106648	0.00050646	0.0956201	0.0080835	0.0080835	-0.076038	0.0688562	-0.0118727	0.00067086	0.031458	0.0204108	0.18056	0.18615	0.168465	0.184005	0.0475827	0.140414	0.179027	0.254775	0.262696	0.165981	0.000416329	0.169748	0.223042	0.0616288	0.115728	0.100036	0.211396	0.0385819	0.0924363	0.0523673	0.194174
145	-0.0247682	0.0760094	-0.0056441	0.0415048	0.0142175	0.0142175	-0.0740773	0.0852876	-0.0217178	-0.0053546	0.033897	0.0157321	0.192227	0.195981	0.178194	0.158396	0.00815663	0.107074	0.166679	0.260771	0.277528	0.159003	0.0193744	0.157922	0.208318	0.034015	0.119908	0.0780821	0.213684	0.0397671	0.123799	0.034019	0.231859
146	-0.0298672	0.105554	0.00873454	0.037737	0.0134494	0.0134494	-0.0575888	0.0731664	-0.0191601	0.0216589	-0.000485	0.00597043	0.192927	0.216578	0.187263	0.156437	0.0558464	0.125511	0.175541	0.249138	0.273857	0.181038	0.00475879	0.164798	0.190835	0.0720067	0.153055	0.102528	0.214377	0.0160174	0.10389	0.0565269	0.214525
147	-0.0541657	0.106166	0.0102875	0.0429124	0.0124317	0.0124317	-0.0946647	0.0664051	-0.0111224	0.0157492	0.00164691	0.00463032	0.19203	0.192083	0.175201	0.178964	0.0592308	0.13916	0.16527	0.240909	0.262741	0.157843	-0.00977432	0.171824	0.190932	0.0488962	0.130872	0.10494	0.211857	0.00514784	0.120359	0.0433068	0.255948
148	-0.023836	0.109183	0.00682582	0.0408963	-0.0030626	-0.0030626	-0.0882636	0.0793063	-0.0174651	0.0341845	0.0161236	0.0189843	0.199365	0.207442	0.2043	0.159531	0.0370501	0.139632	0.14543	0.236414	0.250532	0.170038	0.0250598	0.17912	0.201886	0.0629244	0.10582	0.121603	0.17113	0.0365085	0.0909376	0.0368455	0.2154
149	-0.0198521	0.110457	0.00126669	0.0239842	-0.0105926	-0.0105926	-0.103763	0.0683786	-0.0087206	-0.00283	-0.0035596	0.023389	0.190743	0.186335	0.176442	0.154505	0.0247648	0.171279	0.165808	0.243554	0.292116	0.142995	0.0212658	0.150841	0.187148	0.0681012	0.11774	0.0828987	0.212225	0.0261614	0.131875	0.0306986	0.215604
150	-0.0379097	0.0845461	0.0204565	0.0736392	0.0393504	0.0393504	-0.0958197	0.0836568	-0.0125731	0.00970045	-0.0081549	0.0194539	0.192008	0.179696	0.199942	0.147404	0.0511392	0.159675	0.142523	0.241129	0.270433	0.174852	0.049465	0.175753	0.17592	0.0701969	0.109006	0.088148	0.200942	0.0687049	0.106158	0.0643506	0.184758
151	-0.0622156	0.0898552	0.0164209	0.0364697	-0.0275445	-0.0275445	-0.093816	0.0845334	-0.0041759	0.0451866	-0.0133483	-0.020462	0.21413	0.182793	0.175914	0.134267	0.0153772	0.174879	0.158581	0.234309	0.255153	0.160644	0.0322812	0.16811	0.164135	0.0457629	0.120706	0.0381241	0.196281	0.0391589	0.100397	0.033286	0.216464
152	-0.0380725	0.0815944	0.0226856	0.0638873	-0.0331329	-0.0331329	-0.0910824	0.0698504	-0.0068255	0.0247629	0.00494709	-0.0109679	0.222509	0.1991	0.178484	0.138648	0.0407594	0.213838	0.152658	0.23616	0.239744	0.167966	0.0335096	0.160352	0.166798	0.0489173	0.119907	0.102646	0.161991	0.0392584	0.0935705	0.0365102	0.192743
153	-0.0621136	0.0734918	0.00699367	0.0619035	-0.0520159	-0.0520159	-0.117303	0.0741464	-0.0014994	0.00472288	-0.0080179	0.00409492	0.210013	0.163762	0.188836	0.148123	0.0279185	0.201586	0.153614	0.226648	0.266222	0.144556	0.0495749	0.148828	0.183195	0.0559739	0.120067	0.0578698	0.204268	0.0578602	0.0999172	0.0373147	0.205311
154	-0.0732829	0.103769	0.0133501	0.0391435	-0.0547125	-0.0547125	-0.0971064	0.0790117	-0.0059865	0.0297108	-0.0043684	-0.0050237	0.210353	0.15972	0.185315	0.1504	0.0266731	0.186604	0.173183	0.216617	0.259067	0.138752	0.0377788	0.173933	0.169758	0.0409462	0.123085	0.0677908	0.176887	0.0471734	0.111395	0.0316807	0.206082
155	-0.005374	0.0875593	0.0193887	0.039276	-0.0657065	-0.0657065	-0.0842185	0.0818406	-0.0123822	0.0332062	-0.0018417	-0.0054372	0.226296	0.180494	0.164126	0.167415	0.012803	0.18416	0.17115	0.241053	0.30053	0.146506	0.0486663	0.173984	0.184035	0.0261782	0.119825	0.0377546	0.190687	0.0420145	0.0975112	0.00758075	0.174495
156	0.0209796	0.0834223	0.0158046	0.0715531	-0.0638062	-0.0638062	-0.105347	0.0666942	0.00418971	0.0431692	0.00611733	-0.0186833	0.215968	0.186632	0.174436	0.156902	0.0378863	0.165766	0.16795	0.249795	0.27172	0.149671	0.0378918	0.154331	0.171702	0.025507	0.104911	0.0622831	0.193308	0.0431338	0.122422	0.00626942	0.168315
157	0.0286573	0.0379558	-0.0114482	0.0373661	-0.0569866	-0.0569866	-0.0778997	0.0710582	-0.0026488	0.0230758	0.00181219	-0.0265566	0.217078	0.15417	0.200998	0.15617	0.049448	0.170016	0.163035	0.272792	0.308082	0.151102	0.0324039	0.171974	0.167766	0.0469506	0.108219	0.0393901	0.17467	0.0483409	0.137496	0.0217728	0.13766
158	0.031609	0.069116	0.00929316	0.0219447	-0.0785767	-0.0785767	-0.105555	0.075233	0.0304608	0.0263012	0.00316533	-0.0193219	0.201191	0.14255	0.187432	0.142649	0.024632	0.166476	0.173518	0.279962	0.284645	0.156646	0.044107	0.169711	0.17058	0.0253352	0.105113	0.0260049	0.148597	0.0457297	0.12388	0.0129709	0.1882
159	0.00417576	0.0600179	0.00859305	0.0370893	-0.076541	-0.076541	-0.0999239	0.0718647	0.0120316	0.0432048	0.00227302	-0.0183923	0.191666	0.170786	0.184247	0.146582	0.0451434	0.154114	0.198872	0.254802	0.297756	0.146332	0.00537285	0.189696	0.172401	0.0586924	0.10062	0.101239	0.185881	0.0221215	0.119021	0.03633	0.191313
160	-0.0179736	0.0374723	0.00624191	0.0349557	-0.0717471	-0.0717471	-0.121584	0.0845406	0.014281	0.0341059	0.00498355	-0.0107747	0.188119	0.175307	0.152613	0.131294	0.0366584	0.179225	0.153148	0.254614	0.289734	0.15952	0.0079675	0.156451	0.137823	0.0387802	0.116437	0.0660479	0.164739	0.0175605	0.148113	0.0316122	0.166539
161	0.0319359	0.0492028	0.025138	0.0543975	-0.0410725	-0.0410725	-0.105594	0.0810009	0.0300257	0.0293027	-0.0080682	-0.0156297	0.182285	0.156745	0.144517	0.153297	0.0600336	0.158178	0.177112	0.253111	0.280929	0.16467	0.0266564	0.153289	0.176137	0.0389058	0.105616	0.0396194	0.172715	0.0328075	0.129577	0.0200526	0.136539
162	-0.0184573	0.0373743	0.0189345	0.071798	-0.0190474	-0.0190474	-0.111914	0.0812192	0.0054012	0.0427295	-0.0070522	-0.0227821	0.174378	0.146359	0.14901	0.164862	0.0180389	0.188841	0.166583	0.247516	0.307325	0.168656	0.0262869	0.146842	0.155701	0.0458208	0.0907597	0.0632632	0.166017	0.0405164	0.114847	0.0305098	0.120062
163	0.00688461	0.0579794	0.0290782	0.042298	-0.0204077	-0.0204077	-0.0943747	0.0601335	0.0140864	0.046215	-0.0067222	-0.0203454	0.204695	0.15555	0.170739	0.163669	0.00141247	0.178544	0.186825	0.253835	0.259765	0.16324	0.0178827	0.180745	0.152717	0.0497144	0.0889608	0.0937535	0.208556	0.0290391	0.120263	0.0216519	0.151985
164	-0.0090307	0.0818893	0.0368545	0.0299442	-0.0258323	-0.0258323	-0.108157	0.036187	0.0255077	0.0513875	-0.0131805	-0.0068289	0.205251	0.152518	0.155184	0.162281	0.0223286	0.195746	0.151648	0.273377	0.269108	0.18372	0.0342517	0.141131	0.14801	0.0412849	0.0733802	0.076088	0.184765	0.018511	0.137103	-0.00559344	0.0706161
165	0.0193377	0.0788968	0.0323947	0.0467543	-0.0260004	-0.0260004	-0.127224	0.0534061	0.0144544	0.0435829	0.0119275	-0.003635	0.212257	0.151506	0.1595	0.171128	0.0298498	0.185596	0.160592	0.268481	0.252309	0.184505	0.0313226	0.138884	0.162116	0.0446185	0.087214	0.0903145	0.221787	0.0319939	0.124041	0.0206527	0.0976426
166	0.0164269	0.0130027	0.0104506	0.019325	0.0172931	0.0172931	-0.115715	0.0473211	0.032922	0.0363815	0.00751048	-0.007368	0.199469	0.152772	0.156184	0.165303	0.0276884	0.16114	0.155292	0.255069	0.272887	0.175457	0.0148687	0.159641	0.130652	0.0515258	0.0878099	0.096586	0.178436	0.0203041	0.118256	0.0202884	0.10402
167	-0.0006545	0.0588204	0.0353982	0.00700654	-0.018484	-0.018484	-0.0790426	0.0561122	0.00672011	0.0706744	0.0015267	-0.0124939	0.200493	0.152458	0.128848	0.168331	0.0111652	0.179692	0.168263	0.272633	0.258293	0.168138	0.0135513	0.146492	0.163086	0.0430255	0.0946404	0.0448293	0.160631	0.0383583	0.131699	0.0369438	0.10338
168	-0.0133484	0.0556647	-0.0009825	0.0287865	0.00071518	0.00071518	-0.110369	0.075224	0.011168	0.0642149	0.0135982	-0.0130284	0.196318	0.158468	0.144666	0.154141	0.0225722	0.179402	0.129061	0.25742	0.244155	0.216434	0.0466373	0.157123	0.148333	0.0290904	0.115539	0.0811694	0.17138	0.0398573	0.126967	0.0502946	0.0887174
169	0.00204001	0.0476748	0.0101954	0.0161611	-0.043049	-0.043049	-0.0855054	0.0565919	0.0222086	0.0598202	-0.0010693	-0.0297182	0.208933	0.160504	0.138834	0.137848	0.00855784	0.144805	0.160473	0.249815	0.260003	0.207492	0.019993	0.144838	0.134487	0.0634583	0.113225	0.0756623	0.175428	0.0165543	0.113864	0.0425745	0.114124
170	-0.0537545	0.0596742	0.0241562	-0.0099268	-0.0448489	-0.0448489	-0.0935866	0.0746699	0.0375137	0.0772374	-0.0112207	-0.0118593	0.212101	0.16452	0.140291	0.14675	0.0202908	0.15441	0.162958	0.244095	0.252769	0.188296	0.0318215	0.140645	0.130049	0.0502125	0.120502	0.0498008	0.194135	0.0378012	0.136507	0.0460279	0.127064
171	-0.0618927	0.0459714	0.0386586	0.0283291	-0.0581161	-0.0581161	-0.0879218	0.0743554	0.0255134	0.0683478	0.0189578	-0.0196822	0.208299	0.157461	0.132237	0.152563	0.0339568	0.197919	0.16763	0.223399	0.260755	0.16815	0.0464022	0.135619	0.152713	0.0345793	0.109516	0.0208778	0.175889	0.0439674	0.134344	0.0472016	0.104006
172	-0.0273761	0.0451965	0.0257245	0.0328718	-0.0588607	-0.0588607	-0.106393	0.0464658	-0.003629	0.0578639	0.00817127	-0.0284701	0.217096	0.165989	0.1157	0.158774	0.0186243	0.165585	0.180035	0.231478	0.255396	0.168566	0.027828	0.135354	0.136164	0.0282321	0.131969	0.0134291	0.204217	0.0383415	0.149923	0.0387605	0.0917498
173	-0.0564109	0.033185	0.0357903	0.0122738	-0.08027	-0.08027	-0.104593	0.0543198	0.00731374	0.0592099	0.00846027	-0.0319127	0.197524	0.154548	0.122541	0.135503	0.0416183	0.144876	0.187804	0.240338	0.238695	0.194916	0.0486431	0.127192	0.120557	0.0567224	0.141798	0.0549968	0.180317	0.0607071	0.119566	0.0418857	0.105148
174	-0.103466	0.047479	0.0160332	0.0094038	-0.0722267	-0.0722267	-0.0968415	0.0412118	-0.00086	0.102298	-0.0102129	-0.0242649	0.187643	0.15253	0.130033	0.149361	0.0305274	0.137912	0.187364	0.218757	0.240281	0.186211	0.0468266	0.111615	0.14369	0.0392639	0.123824	0.0918146	0.172002	0.0541889	0.164732	0.034711	0.123039
175	-0.0764019	0.0391917	-0.0068037	0.0375902	-0.0530887	-0.0530887	-0.0922731	0.0499882	-0.0043143	0.0330153	-0.0060207	-0.0230551	0.210728	0.131653	0.109789	0.126554	0.0130208	0.139759	0.165868	0.208946	0.240918	0.183338	0.0272795	0.143904	0.119491	0.068216	0.136909	0.0583022	0.208628	0.0344771	0.138939	0.0441584	0.150194
176	-0.0514023	0.0509418	0.0175954	0.0226597	-0.0324994	-0.0324994	-0.103487	0.0682676	0.0061527	0.0620538	0.00192363	-0.0324789	0.222395	0.144613	0.128951	0.134101	0.0312758	0.148753	0.190003	0.191044	0.243115	0.183775	0.0452732	0.13276	0.139835	0.0388946	0.147404	0.056812	0.156238	0.0321978	0.115894	0.0480718	0.106326
177	-0.0449608	0.0508739	0.0146945	0.0242433	-0.0616686	-0.0616686	-0.0799652	0.0420426	-0.0076732	0.0358245	-0.0144753	-0.0447845	0.216168	0.157205	0.123563	0.115788	0.0569348	0.127802	0.17934	0.186695	0.265627	0.18104	0.0509447	0.142527	0.138116	0.0414842	0.131135	0.0615851	0.186171	0.0415951	0.151334	0.0869689	0.0843707
178	-0.0561253	0.0540511	0.0149112	0.0531207	-0.0709122	-0.0709122	-0.0928734	0.0250198	0.0112779	0.0541196	0.00445017	-0.0193719	0.21436	0.161303	0.125314	0.11763	0.0352104	0.125543	0.184405	0.198753	0.278403	0.183978	0.053512	0.174828	0.132824	0.0459055	0.142795	0.0650896	0.170377	0.0340272	0.12214	0.0622566	0.106953
179	-0.0443447	0.0323865	0.0201869	0.0691684	-0.042969	-0.042969	-0.0863402	0.0153856	0.0130247	0.0329087	-0.0076477	-0.0172076	0.194435	0.163651	0.119659	0.134503	0.0441573	0.133579	0.176084	0.18784	0.255257	0.149206	0.0261359	0.172734	0.136089	0.0423971	0.125539	0.0816788	0.18733	0.0410233	0.137585	0.0684923	0.100381
180	-0.0457053	0.029261	0.013972	0.0806514	-0.0545735	-0.0545735	-0.049507	0.0306632	0.0169367	-0.0074022	-0.0351798	-0.0029504	0.216792	0.154935	0.12008	0.143438	0.0720109	0.129454	0.16657	0.212267	0.24548	0.197974	0.0238307	0.211748	0.166164	0.0442928	0.114742	0.0435643	0.177053	0.0318634	0.133215	0.0340422	0.0894428
181	-0.0558832	0.0432505	0.021596	0.0608902	-0.0514094	-0.0514094	-0.0910229	0.0475019	-0.008132	0.012319	-0.0002939	-0.0072407	0.208883	0.148629	0.125255	0.134202	0.0543238	0.138414	0.156551	0.216273	0.266957	0.157217	0.0557364	0.219568	0.150369	0.021695	0.115502	0.0183652	0.165951	0.0532728	0.126632	0.0600435	0.11161
182	-0.0213056	0.0285474	0.00756257	0.0348594	-0.0415166	-0.0415166	-0.0887174	0.0427939	-0.0060844	0.0371779	-0.0073336	-0.0057395	0.22259	0.138615	0.130509	0.133759	0.0402786	0.116911	0.159865	0.183317	0.287715	0.135828	0.020052	0.191577	0.150997	0.00871394	0.108613	0.0735121	0.197805	0.0278457	0.131238	0.0372722	0.0727649
183	-0.087963	0.0319705	0.0100737	0.0377078	-0.0114305	-0.0114305	-0.066782	0.0283675	-0.0030061	0.0504516	-0.0099415	-0.0014066	0.20764	0.145856	0.121361	0.145934	0.0799613	0.109711	0.150587	0.19891	0.25281	0.145844	0.0681837	0.218726	0.158204	0.0154575	0.115247	0.0509103	0.166138	0.0581324	0.139115	0.0225822	0.0889158
184	-0.102019	0.0235602	0.00773174	0.0616257	-0.0178804	-0.0178804	-0.0607404	0.0427355	-0.0021475	0.0330707	-0.0003888	-0.0228584	0.21825	0.153242	0.150013	0.157819	0.0600922	0.109951	0.153256	0.185196	0.266752	0.162754	0.0220348	0.21016	0.123947	0.0059061	0.137987	0.0326755	0.162445	0.0101697	0.123116	0.0141322	0.115318
185	-0.0806161	0.0544792	0.0228415	0.0306596	-0.0057215	-0.0057215	-0.0669396	0.0450689	-0.0273255	0.0700694	0.0199238	-0.0115863	0.230101	0.143965	0.158601	0.150369	0.0319745	0.0919331	0.138507	0.198991	0.279091	0.152435	-0.000696377	0.186273	0.136898	0.0136768	0.139974	0.0118179	0.162888	0.0145686	0.121394	0.031382	0.0940187
186	-0.0659736	0.0156151	0.0116143	0.0787681	-0.0100282	-0.0100282	-0.0772874	0.0430306	-0.0211902	0.06328	0.00223083	0.007003	0.222264	0.124183	0.180741	0.162715	0.0188398	0.0925223	0.177915	0.21355	0.259096	0.147013	0.0212184	0.195191	0.122742	0.0053505	0.136295	0.0182075	0.160833	0.0341734	0.124885	0.0337501	0.0800034
187	-0.0495924	0.0398742	0.0152814	0.0497133	-0.0280645	-0.0280645	-0.0677741	0.0347666	0.00102529	0.0750001	0.00305983	-0.0046021	0.213093	0.132488	0.154302	0.171555	0.0531994	0.0979368	0.150289	0.193311	0.237864	0.165449	0.0465119	0.179955	0.160541	-0.0167221	0.10815	0.00594722	0.172042	0.0512182	0.134256	0.0486772	0.0879931
188	-0.113817	0.0497652	-0.0063981	0.063289	-0.0229099	-0.0229099	-0.0931193	0.0276687	-0.0008537	0.0702154	-0.0078323	-0.0016581	0.187455	0.100797	0.158357	0.171246	0.0507438	0.12073	0.15249	0.213296	0.272164	0.144459	0.025611	0.199547	0.140625	-0.0354707	0.118673	0.0531554	0.161676	0.0214409	0.12773	0.0363605	0.13086
189	-0.0782099	0.0600907	0.00154251	0.110628	-0.0132078	-0.0132078	-0.103315	0.0241322	-0.0024327	0.0799119	-0.0172936	-0.0033767	0.183422	0.108773	0.156976	0.169361	0.0564392	0.113099	0.14025	0.246557	0.283534	0.164627	0.0304675	0.196963	0.147387	-0.0261923	0.122047	0.0200599	0.154742	0.0376943	0.13368	0.0638972	0.125714
190	-0.144475	0.0250362	0.0272054	0.0690975	-0.0196133	-0.0196133	-0.0993185	0.00475208	0.00424447	0.0562707	-0.022591	-0.0218105	0.172422	0.11316	0.134436	0.158857	0.045231	0.114745	0.136974	0.211498	0.258231	0.169692	0.0143548	0.207325	0.148441	-0.00149351	0.113557	0.0793322	0.153424	0.0304891	0.123814	0.035541	0.119988
191	-0.114109	0.0289019	0.0132567	0.105328	0.0110458	0.0110458	-0.105273	0.0219405	-0.010676	0.054273	-0.0163902	-0.0225491	0.187738	0.131793	0.111235	0.175862	0.048024	0.119391	0.143908	0.18882	0.27181	0.136532	0.0065369	0.192548	0.14219	-0.000239527	0.0857056	0.0633957	0.174709	0.015116	0.132206	0.0403619	0.131077
192	-0.0786886	0.0731257	0.0254934	0.0777901	0.0171281	0.0171281	-0.0809095	0.00020265	-0.0013371	0.0559669	-0.0395985	-0.0216973	0.177302	0.130612	0.116848	0.18938	0.0272044	0.094691	0.127509	0.187358	0.290263	0.14992	0.0370103	0.229645	0.144517	0.0017352	0.0967324	0.0112991	0.16296	0.0290781	0.112168	0.0288439	0.146883
193	-0.101596	0.057779	0.0127832	0.0823254	0.0271615	0.0271615	-0.094714	0.0128719	0.0064988	0.0516839	-0.0097415	-0.0078545	0.199734	0.0980874	0.138957	0.177031	0.0380655	0.127359	0.118291	0.187192	0.242256	0.132752	0.0136777	0.225088	0.139935	-0.0152927	0.106531	-0.00788124	0.151992	0.0277909	0.129607	0.0356686	0.114961
194	-0.110076	0.0241017	0.0217638	0.0518967	0.0171787	0.0171787	-0.0804352	0.0224508	-0.0014727	0.0392376	-0.0223891	-0.0117683	0.183426	0.106282	0.14007	0.19551	0.0244857	0.075154	0.105127	0.190625	0.266922	0.149716	0.0151969	0.196057	0.136179	-0.00218323	0.10784	0.00929474	0.17173	0.0297237	0.115061	0.015897	0.128907
195	-0.113634	0.0394709	0.0329425	0.071931	0.0296942	0.0296942	-0.0806135	0.0146252	0.00066478	0.0336558	0.00687795	-0.0035795	0.209178	0.110643	0.148212	0.163407	0.0202565	0.0665445	0.122644	0.18052	0.222915	0.15502	0.0288024	0.204992	0.131681	-0.00942364	0.110833	0.00123908	0.161495	0.0371725	0.0990692	0.00554118	0.134232
196	-0.14929	0.074106	0.0218809	0.0631078	0.0336168	0.0336168	-0.0770567	0.003112	0.0226949	0.0433803	0.0118756	0.029908	0.231239	0.125472	0.144925	0.168817	0.0434062	0.0743318	0.141131	0.1756	0.247949	0.129171	0.0445549	0.196882	0.141593	0.00642024	0.104445	-0.0112346	0.150059	0.0328092	0.130685	-0.00171168	0.128764
197	-0.108175	0.0716051	0.0480822	0.0714501	0.0483082	0.0483082	-0.0697841	0.013085	0.0132427	0.0462705	-0.0035567	0.00070498	0.217714	0.130835	0.148242	0.168414	0.0613796	0.0622714	0.130665	0.181581	0.268437	0.156416	0.0111983	0.231451	0.130962	0.0120468	0.0848824	-0.00529985	0.152991	0.0167471	0.133619	0.0374368	0.131522
198	-0.141925	0.0643381	0.0285907	0.0759776	0.0235143	0.0235143	-0.0590952	0.00063244	0.0173948	0.0529321	-0.0185161	0.0243149	0.222046	0.128625	0.164909	0.15186	0.0517642	0.0632547	0.128131	0.181638	0.221831	0.164004	0.0428432	0.217037	0.149076	0.0104728	0.0846485	0.00409316	0.164192	0.0386987	0.135175	0.0308801	0.142638
199	-0.09672	0.0923599	0.0313283	0.0775855	0.00219193	0.00219193	-0.0831824	-0.0036884	0.0274645	0.0353547	-0.0099635	0.00078927	0.211474	0.114111	0.153142	0.163918	0.0625295	0.0888862	0.118804	0.165612	0.2698	0.113947	0.0207855	0.207848	0.112087	-0.021768	0.0832094	-0.0138689	0.166027	0.0280967	0.0853089	0.0253096	0.13999
200	-0.0869366	0.0470324	0.0367539	0.0511982	-0.0007677	-0.0007677	-0.0741463	0.00972509	0.00241021	0.0535926	-0.0171042	0.0278247	0.195892	0.113035	0.143135	0.163361	0.0357426	0.0871438	0.0770115	0.157317	0.276581	0.12839	-0.00216497	0.183359	0.143131	-0.0133286	0.082432	0.00408368	0.191756	0.00641136	0.0990548	0.0182341	0.13596
201	-0.0968325	0.0886821	0.0246079	0.0803748	-0.0276268	-0.0276268	-0.067854	0.0046812	0.0136377	0.0413525	-0.0075505	0.0176383	0.213703	0.113034	0.12742	0.157865	0.0723722	0.105826	0.0905197	0.158155	0.271658	0.145632	0.0469244	0.151181	0.108857	0.0177466	0.091661	0.00563927	0.1884	0.0303264	0.111335	0.0100302	0.107804
202	-0.0943865	0.0746814	0.0456994	0.0468688	-0.0045109	-0.0045109	-0.0701449	-0.0109051	-0.0107075	-0.0080476	-0.0011284	0.0394536	0.207457	0.115789	0.154361	0.166224	0.0731339	0.0877709	0.0941078	0.179845	0.255875	0.154623	0.0379557	0.172353	0.120321	0.0054488	0.102454	-0.00522496	0.181712	0.0339452	0.146039	0.0174612	0.145104
203	-0.0839832	0.068115	0.0203744	0.0585528	-0.0015094	-0.0015094	-0.057043	0.0154878	0.00589966	0.0220603	-0.0041933	0.0357154	0.194475	0.122305	0.15613	0.160283	0.0284926	0.0958125	0.12727	0.162933	0.282998	0.124739	0.0309533	0.172849	0.146491	0.0176901	0.105913	0.000368426	0.164057	0.0309964	0.106153	0.01414	0.114722
204	-0.0807132	0.0406191	0.0176142	0.0724136	0.0232059	0.0232059	-0.0632124	0.0284635	-0.0049686	0.00589689	-0.0174152	0.0381368	0.206103	0.134254	0.14709	0.173311	0.0303198	0.0987083	0.118172	0.157658	0.239574	0.142888	0.0374891	0.141301	0.114179	0.0279651	0.0972102	0.0208928	0.144222	0.02933	0.141215	-0.00545877	0.135991
205	-0.082059	0.0776812	0.0280948	0.0498656	-0.0153735	-0.0153735	-0.048726	0.0229252	0.00477542	0.00147008	0.00213641	0.0316679	0.203565	0.128579	0.158767	0.162015	0.00157023	0.0852171	0.125428	0.169521	0.2275	0.165246	0.0330478	0.133575	0.113618	-0.00164596	0.0974181	-0.0231699	0.147493	0.0286278	0.14825	0.0324221	0.131091
206	-0.106201	0.0904859	0.0171938	0.049759	-0.0163477	-0.0163477	-0.0655632	0.0343133	-0.0087237	0.0371584	-0.010749	0.027002	0.178809	0.126894	0.170623	0.166456	0.0102594	0.0681039	0.151703	0.176843	0.217032	0.16101	0.0292236	0.124361	0.125297	0.0148066	0.106723	0.0249336	0.154046	0.0352893	0.121519	-0.00388335	0.131162
207	-0.0894758	0.0918664	0.0167064	0.0952653	-0.0052477	-0.0052477	-0.0710531	0.0287013	0.00911984	0.0189711	-0.0174013	0.0404333	0.162704	0.15087	0.150091	0.171493	-0.00317066	0.0952108	0.147101	0.15674	0.18121	0.151883	0.0282877	0.135377	0.114051	0.0218659	0.0944029	0.0202207	0.156348	0.0159062	0.105965	0.0374751	0.0901253
208	-0.1109	0.122955	0.03902	0.0402749	-0.023588	-0.023588	-0.0740546	0.0397082	-0.0034508	0.0197942	-0.0132863	0.0283362	0.187645	0.140943	0.155882	0.174227	-0.0162021	0.0883943	0.142155	0.131798	0.23659	0.165271	0.0407579	0.163762	0.0953898	-0.00197404	0.111914	0.0241058	0.173416	0.0455005	0.125865	0.035057	0.124072
209	-0.0660944	0.0965535	0.0281247	0.0777101	-0.0185105	-0.0185105	-0.0560422	0.0309515	-0.0146106	-0.0217823	-0.0026528	0.0111465	0.187562	0.15737	0.156897	0.174352	0.0173286	0.121197	0.154804	0.139188	0.240185	0.167317	0.0453835	0.141515	0.113975	0.0239629	0.103257	0.0157834	0.161033	0.0355936	0.119299	0.0204599	0.137289
210	-0.116385	0.109751	0.0180955	0.0891123	-0.0177005	-0.0177005	-0.0707439	0.0364374	6.5305e-05	0.0280034	-0.017287	0.0202736	0.193765	0.152083	0.137931	0.173035	0.00204893	0.116182	0.170786	0.120389	0.266558	0.147634	0.0132181	0.134993	0.104529	0.00461122	0.109205	0.0262172	0.154712	0.0240304	0.122776	0.0136226	0.150999
211	-0.0498442	0.0978283	0.0237611	0.0777015	-0.0239774	-0.0239774	-0.0500965	0.0341239	-0.0080063	-0.0186859	-0.0093765	0.00032243	0.192495	0.178408	0.136246	0.150504	0.00344569	0.09079	0.164678	0.130063	0.215496	0.154991	0.00770618	0.156511	0.103722	0.024201	0.0965899	0.0349527	0.17534	0.00983258	0.129449	0.0238243	0.158982
212	-0.0596435	0.0969886	0.0172254	0.0798272	-0.0181005	-0.0181005	-0.0416284	0.0311807	-0.0078981	-0.0222817	-0.0042891	-0.0110288	0.184638	0.157414	0.159035	0.170111	0.00165299	0.105247	0.14736	0.143997	0.217625	0.136531	0.00692602	0.162256	0.0778888	0.023425	0.121771	0.00739757	0.151244	0.0115064	0.126569	0.0351103	0.158967
213	-0.0977578	0.0980534	0.0193241	0.104102	-0.0419923	-0.0419923	-0.0591778	0.0307975	-0.0239484	0.0116865	-0.017514	0.0134739	0.199247	0.162313	0.146717	0.153554	0.0166756	0.12736	0.121352	0.139338	0.220697	0.145862	0.00479335	0.189047	0.0870479	0.0112902	0.102075	0.00595011	0.153055	0.0209568	0.107232	0.0354549	0.127667
214	-0.0844639	0.114668	0.0134951	0.0838519	-0.0361818	-0.0361818	-0.0622749	0.0149863	-0.0207384	0.00671992	0.0071794	0.017004	0.167136	0.155915	0.138262	0.14703	0.0087823	0.149497	0.122016	0.139352	0.224231	0.161048	0.00938726	0.130241	0.0995229	0.0128055	0.10915	-0.0180527	0.158021	0.0109482	0.123944	0.0242552	0.165732
215	-0.0881589	0.08688	-0.0017246	0.0896162	-0.0435057	-0.0435057	-0.0638855	0.0278367	-0.0134572	0.00876979	-0.0128465	0.0220511	0.182607	0.152448	0.145947	0.175834	0.0243554	0.0833124	0.13932	0.164758	0.202016	0.157282	0.00759172	0.161398	0.0994969	0.0314046	0.116821	-0.00292081	0.180702	0.00682766	0.107515	0.0360063	0.15318
216	-0.0583624	0.0477968	-0.0064922	0.0763737	-0.032324	-0.032324	-0.0465738	0.0359413	-0.0213588	0.0344089	-0.0208054	0.0314111	0.17743	0.145427	0.122655	0.152944	0.0451327	0.0929233	0.140225	0.151026	0.227595	0.173618	0.00214778	0.140667	0.0855353	0.0510999	0.121587	-0.0623792	0.181356	0.0103007	0.0923544	0.0425639	0.175239
217	-0.116026	0.0465713	0.0118345	0.0616351	-0.0250164	-0.0250164	-0.0666714	0.0129456	-0.0115499	0.0193176	-0.0141545	0.00901461	0.204576	0.147863	0.114787	0.130862	0.0589635	0.0880331	0.127998	0.140428	0.222178	0.163537	0.00188168	0.155632	0.108283	0.00648474	0.110993	0.0261485	0.165731	0.0141585	0.0906886	0.0713926	0.188212
218	-0.0441248	0.037455	-0.0097431	0.0684631	-0.0069002	-0.0069002	-0.0732024	0.0116395	-0.036951	-0.0002417	-0.0125343	0.025091	0.203589	0.151975	0.119428	0.11839	0.0574477	0.106322	0.125112	0.147726	0.224822	0.141519	-0.00488817	0.121749	0.0961692	0.0240411	0.129325	0.00110842	0.163534	-0.00849199	0.087515	0.0556283	0.184201
219	-0.0635443	0.0848191	0.00201026	0.0413113	0.0119241	0.0119241	-0.0921471	0.00487127	-0.0316166	-0.0026029	-0.0080704	0.0166708	0.206295	0.139712	0.125231	0.127749	0.0274082	0.0801177	0.116087	0.178455	0.213693	0.124369	0.0117865	0.134576	0.0833809	0.0454831	0.12209	-0.0175533	0.170754	0.0247498	0.0794801	0.0594281	0.156872
220	-0.0832278	0.0716188	0.0089314	0.0831426	0.0163233	0.0163233	-0.0844656	0.0315541	-0.024821	-0.0089963	0.00157967	0.0230177	0.209652	0.131216	0.112319	0.138105	0.0653357	0.0889288	0.116822	0.1411	0.234985	0.160818	0.0251088	0.131845	0.0927857	4.40067e-07	0.121132	0.00164672	0.161476	0.0327247	0.0917991	0.0771102	0.177504
221	-0.0692772	0.0658724	0.0159773	0.0411783	-0.005347	-0.005347	-0.0902575	0.0250153	-0.020132	-0.0005375	-0.0083016	0.0255857	0.220801	0.128249	0.110362	0.116388	0.0314632	0.090288	0.130246	0.165543	0.226567	0.13294	0.0382621	0.135956	0.0991663	0.0082538	0.109111	-0.0121211	0.180671	0.0223823	0.0980867	0.0557328	0.125483
222	-0.107646	0.0344124	0.0232771	0.0385489	0.0233502	0.0233502	-0.077243	0.0178063	-0.0140933	-0.0281176	0.00336066	0.0166507	0.206296	0.136542	0.118214	0.123027	0.0390179	0.0892188	0.154617	0.17241	0.25181	0.148748	0.0359155	0.120522	0.102412	0.0201465	0.128748	-0.0257555	0.161111	0.0259987	0.0914555	0.0689794	0.140447
223	-0.0426998	0.0263858	0.00288595	0.0400727	-0.0182749	-0.0182749	-0.0704505	0.0331599	-0.024193	-0.0123241	-0.009157	-0.0062391	0.200565	0.131689	0.123135	0.119338	0.0395934	0.0759178	0.147709	0.152409	0.229772	0.166637	0.0281711	0.104189	0.0818418	0.0218804	0.127897	-0.0382589	0.174493	0.017778	0.106799	0.0628192	0.12934
224	-0.0470108	0.0293512	0.0329033	0.105651	-0.0067914	-0.0067914	-0.0805924	0.0114556	-0.0176029	-0.0157676	-0.0047155	-0.0099577	0.210648	0.140638	0.131754	0.116779	0.0439156	0.0910367	0.13344	0.179153	0.193233	0.127687	0.0154531	0.137461	0.073528	0.0260376	0.133856	-0.0133451	0.200703	0.0321753	0.083884	0.0898148	0.153033
225	-0.0839738	0.0341383	0.024009	0.0500169	0.0128985	0.0128985	-0.0478641	0.020994	-0.0215348	0.0142315	-0.0033612	-0.0199576	0.220807	0.158325	0.13747	0.120429	0.0357504	0.128651	0.154264	0.170722	0.191211	0.152848	0.0164598	0.129668	0.0817006	0.0094331	0.118358	0.013716	0.185701	0.0332646	0.124197	0.0905031	0.135364
226	-0.0764661	0.0513585	0.033938	0.0762621	0.00739394	0.00739394	-0.0700568	0.0265889	-0.0350008	-0.012176	0.0164759	-0.0108774	0.19515	0.138309	0.142525	0.115156	0.0552746	0.100495	0.156701	0.185557	0.193112	0.150937	0.0291768	0.127552	0.0943854	0.0141173	0.114368	-0.00041874	0.182045	0.0405903	0.074235	0.0871602	0.112284
227	-0.073873	0.0305766	0.0255334	0.0568344	0.0177047	0.0177047	-0.0737477	0.0217274	-0.0155084	0.0192733	-0.0132724	-0.0259799	0.200409	0.138006	0.133695	0.116796	0.0120712	0.143092	0.160764	0.19532	0.208514	0.131339	0.00642177	0.151649	0.107563	0.0028026	0.109319	0.0154979	0.210294	0.0293438	0.106752	0.0983228	0.0964588
228	-0.0355938	0.00839107	0.0250223	0.131269	0.018535	0.018535	-0.0554329	0.014173	-0.0129582	0.00598107	0.0031694	-0.001934	0.206684	0.128255	0.131815	0.114889	0.0478776	0.124466	0.135014	0.187611	0.211669	0.155206	0.0194431	0.162715	0.116248	0.00179969	0.104278	-0.0338018	0.181844	0.0316438	0.102639	0.100232	0.124448
229	-0.0571889	0.0172338	0.0330733	0.0949577	0.00116338	0.00116338	-0.0614055	0.0285229	-0.0156163	-0.0107421	-0.012527	-0.0115766	0.210342	0.140947	0.153308	0.133808	0.0499945	0.124862	0.174424	0.207406	0.184272	0.156749	0.0024253	0.181584	0.114978	0.0185004	0.102375	0.0110523	0.190714	0.0285945	0.109779	0.106303	0.118579
230	-0.0115632	0.0327753	0.0327379	0.098792	-0.0158018	-0.0158018	-0.058581	0.0259062	-0.017283	0.00903517	-0.0246529	-0.0063786	0.219214	0.148687	0.166565	0.132599	0.0702067	0.108915	0.184653	0.193879	0.203435	0.14043	0.00791791	0.17205	0.117849	0.0185181	0.101779	-0.0358223	0.214635	0.0434859	0.101009	0.0618076	0.14288
231	-0.0270368	0.0166463	0.0316277	0.0667775	-0.0203101	-0.0203101	-0.0560674	0.0256276	-0.0082032	0.011425	-0.0090829	-0.0121671	0.216531	0.169566	0.155644	0.131141	0.0363361	0.148935	0.188662	0.205179	0.188628	0.156981	0.0361738	0.165193	0.122708	0.0130786	0.107557	0.0110923	0.209231	0.030076	0.0981407	0.0570668	0.0824421
232	-0.0340266	0.0258066	0.0237074	0.0473644	-0.0203815	-0.0203815	-0.0396289	0.0208196	-0.014786	0.00949667	0.00555844	-0.015719	0.206283	0.15282	0.165214	0.1414	0.0315753	0.110655	0.180987	0.225607	0.178757	0.143212	-0.00508137	0.166259	0.119768	0.00835132	0.105561	-0.0551522	0.201506	0.0143639	0.1138	0.0735427	0.132095
233	-0.0354394	0.0464228	0.0383379	0.0878672	-0.0127643	-0.0127643	-0.0328422	0.0278875	0.00975891	-0.0016732	0.0125572	-0.0334189	0.187419	0.13617	0.141962	0.137247	0.0306624	0.126692	0.210798	0.219938	0.182076	0.150664	0.039603	0.172517	0.113607	0.0050622	0.106086	-0.00499685	0.182507	0.0241525	0.0912614	0.0722446	0.133718
234	-0.05077	0.0646748	0.0354991	0.0893715	-0.0423298	-0.0423298	-0.0367132	0.00390639	-0.0170151	0.00872328	-0.0048098	-0.0041136	0.163064	0.136929	0.146215	0.143558	0.0292091	0.108788	0.152342	0.228694	0.202524	0.140689	0.0379514	0.134181	0.138125	-0.0172911	0.0948652	-0.00418242	0.178971	0.0241521	0.0972602	0.0556818	0.116525
235	-0.0242325	0.0466451	0.0256475	0.0781971	-0.0203846	-0.0203846	-0.0453497	0.0103636	-0.021197	0.0152334	-0.0254301	0.00229283	0.181912	0.129797	0.135748	0.137736	0.0329235	0.128447	0.174445	0.221384	0.215387	0.148893	0.0166639	0.147384	0.138179	-0.00379491	0.107946	-0.0256375	0.168382	0.0200656	0.0942768	0.0795444	0.132914
236	-0.0628878	0.0295513	0.0275743	0.0683924	-0.0387074	-0.0387074	-0.0484989	0.0359851	-0.0219761	0.00318204	-0.0026481	-0.0159446	0.170102	0.118656	0.1586	0.168736	0.0350233	0.147815	0.193391	0.216771	0.224944	0.154918	-0.0120014	0.140815	0.133709	0.0114997	0.0965658	-0.0218428	0.176869	0.0288603	0.0735784	0.0806738	0.153097
237	-0.0309861	0.0375255	0.0123749	0.0701438	-0.0143538	-0.0143538	-0.0394897	0.0287769	-0.0253516	-0.0463274	0.00309482	-0.0125894	0.157423	0.114066	0.143554	0.141122	0.0148132	0.171659	0.21761	0.231521	0.217544	0.169702	-0.00603346	0.145929	0.138684	-0.0202379	0.10433	0.0117601	0.177629	-0.00341192	0.0711895	0.0889045	0.118026
238	-0.0287523	0.0113822	0.0367634	0.0718641	-0.0200729	-0.0200729	-0.0419714	0.0181616	-0.0229877	-0.0537372	-0.0101965	-0.0169051	0.176172	0.129173	0.173035	0.162217	0.0254215	0.135342	0.181834	0.233257	0.224187	0.163684	-0.0221358	0.175424	0.136041	-0.0337128	0.0924737	0.00956457	0.190767	0.0072275	0.0951455	0.0790758	0.141075
239	-0.0412294	0.0149793	0.017402	0.129637	-0.0015382	-0.0015382	-0.0493798	0.0346013	-0.0406335	0.00226688	0.0157212	-0.0222977	0.188985	0.144501	0.171932	0.135848	0.0336721	0.154172	0.213815	0.224583	0.209589	0.180612	-0.00625811	0.144622	0.129123	-0.00202147	0.107167	-0.0448282	0.145019	0.017113	0.0768695	0.0650036	0.122201
240	-0.0560401	0.0469121	0.0303395	0.0542311	-0.0166705	-0.0166705	-0.0433127	0.0321915	-0.0319803	-0.0016025	0.0162251	-0.0066102	0.149129	0.123381	0.182016	0.154319	0.0540995	0.154002	0.20414	0.230164	0.222639	0.165585	0.0166754	0.134157	0.134078	-0.0269351	0.09592	-0.00392753	0.181197	0.0392382	0.093777	0.0919619	0.128472
