# Supplementary material for: ESCO1 and CTCF enable formation of long chromatin loops by protecting cohesinSTAG1 from WAPL
Source: eLife. 2020 Feb 17;9:e52091. doi: 10.7554/eLife.52091 (PMC7054000; doi:10.7554/eLife.52091)
Supplement: Figure 3—figure supplement 1—source data 1. [file elife-52091-fig3-figsupp1-data1.xlsx]

## Sheet: Sheet1
	EGFP-STAG1 control RNAi G1																						EGFP-STAG1 sororin RNAi G1																	EGFP-STAG1 control RNAi G2
0	1	1	1	1	1	1	1	1	1	1	1	1	1	1	1	1	1	1	1	1	1		1	1	1	1	1	1	1	1	1	1	1	1	1	1	1	1		1	1	1	1	1	1	1	1	1	1
1	0.995218	0.990299	0.969549	0.947342	0.965489	1.01244	0.986127	0.986498	0.979619	0.991431	1.00007	1.0127	1.00244	0.994042	1.00066	1.04488	1.01803	0.965961	0.962388	0.95233	0.96446		0.982495	0.958381	0.972063	0.979711	0.998577	1.00848	0.983651	1.02026	1.0037	0.994448	1.05004	0.980977	0.901129	0.999564	0.97993	0.886166		0.981009	0.983836	0.981229	0.976938	0.98167	0.986127	0.986498	0.979619	0.986206	0.997093
2	0.912671	0.890393	0.865114	0.843124	0.930937	0.968888	0.935376	0.88954	0.910895	0.841908	0.855393	0.902202	0.888759	0.887736	0.909018	0.935801	0.906552	0.796755	0.850865	0.879178	0.934083		0.868832	0.819223	0.926124	0.948802	0.898284	0.883032	0.940844	0.936031	0.959267	0.913132	0.937467	0.949645	0.890662	0.955744	0.904506	0.810836		0.866391	0.889767	0.902208	0.854919	0.922112	0.935376	0.88954	0.910895	0.87249	0.916311
3	0.891803	0.829486	0.808308	0.77145	0.875514	0.915629	0.895547	0.87657	0.899974	0.821421	0.799532	0.838371	0.825475	0.819575	0.868777	0.86067	0.879677	0.725522	0.786039	0.838363	0.895243		0.778079	0.746214	0.90652	0.878777	0.858728	0.822327	0.89896	0.940794	0.918062	0.866742	0.934284	0.893294	0.827585	1.00111	0.825832	0.746327		0.80781	0.840637	0.860837	0.830464	0.827389	0.895547	0.87657	0.899974	0.826637	0.871621
4	0.84176	0.807504	0.761494	0.702684	0.820954	0.866873	0.865912	0.813864	0.861702	0.741473	0.777005	0.819667	0.765618	0.791632	0.823957	0.82437	0.83622	0.719123	0.760479	0.777358	0.924163		0.727937	0.6884	0.832115	0.885057	0.825347	0.767311	0.831648	0.865121	0.877344	0.853043	0.849692	0.828	0.759362	0.944361	0.834964	0.705093		0.777037	0.815423	0.822753	0.810134	0.834646	0.865912	0.813864	0.861702	0.778286	0.874416
5	0.834332	0.769204	0.713506	0.677713	0.768408	0.83599	0.827813	0.783274	0.838347	0.727983	0.698436	0.751021	0.720367	0.728944	0.773791	0.753107	0.816175	0.616468	0.711697	0.714603	0.793995		0.672813	0.646436	0.79932	0.859102	0.776589	0.756534	0.813202	0.821092	0.863306	0.820147	0.860499	0.807589	0.737981	0.936298	0.812711	0.69447		0.738936	0.798978	0.791899	0.79485	0.780678	0.827813	0.783274	0.838347	0.773857	0.830247
6	0.792878	0.741348	0.684099	0.630424	0.759553	0.807448	0.779626	0.767726	0.817444	0.674765	0.664679	0.749798	0.69639	0.70261	0.741737	0.696167	0.756752	0.57955	0.67198	0.694112	0.79074		0.642305	0.624362	0.731404	0.833139	0.716257	0.724203	0.782308	0.819042	0.824414	0.803936	0.841285	0.830035	0.703824	0.937973	0.727502	0.667777		0.709087	0.762829	0.763922	0.77884	0.761464	0.779626	0.767726	0.817444	0.787744	0.875136
7	0.759153	0.712593	0.649173	0.59704	0.713182	0.764675	0.761294	0.741953	0.782955	0.649418	0.620919	0.751875	0.666488	0.656437	0.69706	0.720415	0.742386	0.576352	0.636287	0.646427	0.804934		0.616628	0.578614	0.739995	0.817114	0.687121	0.687059	0.772946	0.76028	0.771446	0.740567	0.812054	0.766908	0.663768	0.819529	0.736381	0.637228		0.665582	0.734577	0.723072	0.740678	0.715031	0.761294	0.741953	0.782955	0.753763	0.827679
8	0.725273	0.705152	0.615695	0.592633	0.669213	0.723865	0.73522	0.700599	0.756238	0.585194	0.587928	0.704853	0.656905	0.62825	0.735045	0.669979	0.677895	0.510342	0.615407	0.61196	0.78002		0.610532	0.547147	0.658032	0.789888	0.672402	0.66042	0.759816	0.76992	0.745222	0.725038	0.784094	0.768258	0.621027	0.873394	0.683937	0.627215		0.652519	0.710631	0.691437	0.742089	0.669154	0.73522	0.700599	0.756238	0.73265	0.812706
9	0.713948	0.678109	0.621725	0.553723	0.693606	0.722973	0.699235	0.692911	0.760203	0.606514	0.557529	0.667146	0.656177	0.596566	0.717763	0.597311	0.652743	0.472709	0.598237	0.553802	0.74015		0.570666	0.553782	0.652725	0.769115	0.644295	0.639421	0.723157	0.723123	0.738135	0.724041	0.783186	0.706797	0.5914	0.80658	0.679806	0.632002		0.621277	0.710576	0.669139	0.719981	0.653345	0.699235	0.692911	0.760203	0.720976	0.800222
10	0.712861	0.659028	0.603809	0.545751	0.660492	0.702385	0.692963	0.651586	0.746487	0.585314	0.559144	0.655191	0.635129	0.576077	0.710277	0.630853	0.650433	0.473808	0.564574	0.523099	0.763942		0.587202	0.539436	0.599599	0.762844	0.608875	0.619042	0.719527	0.710081	0.710908	0.676809	0.733277	0.724472	0.633053	0.799001	0.675847	0.572121		0.597656	0.675684	0.665311	0.727176	0.637049	0.692963	0.651586	0.746487	0.703711	0.805439
11	0.707601	0.61955	0.591161	0.527085	0.648073	0.638829	0.65281	0.628371	0.703876	0.569854	0.503327	0.634007	0.59225	0.552351	0.689227	0.635808	0.62287	0.447757	0.56179	0.558382	0.733252		0.593744	0.540694	0.54613	0.725115	0.613261	0.561155	0.714085	0.708219	0.692486	0.689728	0.715682	0.691194	0.558677	0.81004	0.611728	0.570119		0.578273	0.651738	0.659345	0.708655	0.628948	0.65281	0.628371	0.703876	0.686156	0.836753
12	0.687567	0.62055	0.581394	0.51619	0.612689	0.623037	0.622044	0.634153	0.713152	0.582562	0.488962	0.623208	0.575667	0.523681	0.664243	0.581339	0.611143	0.42874	0.549246	0.507535	0.707721		0.581707	0.472788	0.560276	0.748296	0.55925	0.572539	0.70158	0.727522	0.685232	0.669299	0.646359	0.664709	0.493789	0.742344	0.533955	0.546782		0.584465	0.628381	0.616635	0.696966	0.599918	0.622044	0.634153	0.713152	0.68482	0.781199
13	0.651231	0.59543	0.550896	0.492907	0.567043	0.610042	0.594366	0.63641	0.684199	0.54018	0.486943	0.616147	0.552198	0.512117	0.650749	0.567964	0.594954	0.429402	0.552254	0.509864	0.746777		0.51062	0.487294	0.556299	0.731349	0.588923	0.515184	0.678764	0.710399	0.682949	0.675649	0.681733	0.649444	0.477562	0.7309	0.541365	0.513892		0.556931	0.628198	0.604505	0.713907	0.5783	0.594366	0.63641	0.684199	0.69212	0.78051
14	0.670953	0.566245	0.532209	0.496354	0.532788	0.620379	0.575812	0.607164	0.678098	0.527231	0.444623	0.60373	0.522767	0.466171	0.630756	0.617791	0.531336	0.388737	0.534835	0.501264	0.686688		0.543361	0.448638	0.571057	0.723883	0.564226	0.5524	0.631278	0.694176	0.672029	0.66633	0.612269	0.624669	0.440412	0.739628	0.531537	0.522484		0.521167	0.616211	0.58585	0.709569	0.561495	0.575812	0.607164	0.678098	0.674552	0.791113
15	0.650797	0.58574	0.52572	0.489558	0.504054	0.571349	0.557256	0.600559	0.668527	0.499237	0.438027	0.584907	0.513164	0.472468	0.62088	0.552478	0.525583	0.354405	0.505835	0.476232	0.695162		0.526503	0.417542	0.521001	0.669254	0.527818	0.51693	0.632683	0.684551	0.64528	0.654203	0.659989	0.613895	0.406762	0.682165	0.518715	0.516142		0.503737	0.587298	0.566183	0.680518	0.538772	0.557256	0.600559	0.668527	0.670992	0.77478
16	0.635881	0.582128	0.486934	0.46319	0.502682	0.539506	0.558845	0.580215	0.658347	0.497562	0.413279	0.564572	0.497537	0.461542	0.610445	0.533542	0.54412	0.381982	0.526414	0.480168	0.712282		0.505347	0.41197	0.503918	0.66475	0.537936	0.499593	0.623031	0.676749	0.607699	0.619101	0.582677	0.598601	0.429992	0.718461	0.513028	0.520657		0.477943	0.592347	0.569404	0.679196	0.521539	0.558845	0.580215	0.658347	0.655239	0.777669
17	0.605083	0.57296	0.489289	0.443383	0.518761	0.499875	0.541664	0.564622	0.656407	0.493283	0.406646	0.548516	0.496521	0.44457	0.577354	0.488184	0.508223	0.341262	0.48156	0.477397	0.650447		0.452066	0.392954	0.508525	0.631802	0.498603	0.492001	0.591149	0.597751	0.625919	0.611633	0.57034	0.511435	0.397017	0.640335	0.511324	0.495902		0.479814	0.57287	0.547583	0.67308	0.521889	0.541664	0.564622	0.656407	0.638771	0.797555
18	0.576861	0.551959	0.476009	0.440406	0.529949	0.53102	0.542946	0.53754	0.612657	0.482419	0.388778	0.537691	0.471377	0.413407	0.568127	0.465874	0.480274	0.34326	0.484951	0.441232	0.711552		0.442639	0.386668	0.483512	0.664321	0.514456	0.47793	0.577751	0.590337	0.60774	0.60384	0.648442	0.516127	0.375086	0.666304	0.524724	0.46706		0.497384	0.545072	0.52931	0.672103	0.506509	0.542946	0.53754	0.612657	0.625426	0.740033
19	0.581318	0.53429	0.456527	0.41497	0.474575	0.532178	0.549491	0.565533	0.610337	0.471573	0.383373	0.513233	0.46031	0.397308	0.566713	0.455118	0.490123	0.334132	0.461186	0.401658	0.634957		0.453726	0.395337	0.457042	0.632726	0.50017	0.486976	0.577006	0.589764	0.591558	0.588801	0.589325	0.483643	0.424159	0.608912	0.446618	0.491098		0.463742	0.54628	0.515167	0.660444	0.52023	0.549491	0.565533	0.610337	0.623247	0.736114
20	0.567639	0.533502	0.439089	0.396398	0.425863	0.505416	0.520386	0.522737	0.597332	0.454645	0.385413	0.526539	0.460012	0.382628	0.565038	0.454208	0.522305	0.344924	0.456753	0.427308	0.633933		0.426038	0.387845	0.452203	0.611156	0.474952	0.463905	0.528363	0.580275	0.578502	0.548638	0.561219	0.526132	0.336159	0.660825	0.467081	0.469658		0.456042	0.507349	0.516393	0.656122	0.509013	0.520386	0.522737	0.597332	0.6186	0.713081
21	0.554771	0.525958	0.453072	0.37607	0.408276	0.461676	0.50855	0.522741	0.586913	0.414422	0.376008	0.503629	0.434397	0.37663	0.556123	0.441	0.491312	0.33413	0.461183	0.387431	0.575767		0.429863	0.357468	0.408046	0.609	0.462567	0.465574	0.55827	0.540893	0.578772	0.565969	0.601656	0.50134	0.354816	0.668847	0.455131	0.432995		0.43711	0.498921	0.505059	0.648942	0.495052	0.50855	0.522741	0.586913	0.614736	0.714307
22	0.53602	0.530023	0.430343	0.369922	0.39348	0.447792	0.511669	0.520093	0.593855	0.434203	0.36138	0.50792	0.419097	0.347966	0.543059	0.401471	0.455797	0.334832	0.462095	0.419513	0.615784		0.420362	0.377671	0.4146	0.579953	0.474501	0.454546	0.530216	0.50138	0.579683	0.56102	0.559991	0.478088	0.326613	0.548749	0.430447	0.455267		0.427546	0.519006	0.495552	0.636518	0.470761	0.511669	0.520093	0.593855	0.571396	0.70428
23	0.543124	0.51238	0.45018	0.35642	0.361542	0.426632	0.48359	0.497759	0.584307	0.436257	0.357617	0.454007	0.428375	0.358743	0.516536	0.419707	0.458287	0.296851	0.44222	0.390658	0.610538		0.399944	0.412286	0.413787	0.531946	0.453749	0.43973	0.503262	0.523003	0.581433	0.579451	0.559884	0.474455	0.342773	0.634801	0.409271	0.458983		0.424369	0.502804	0.516045	0.625011	0.458733	0.48359	0.497759	0.584307	0.568759	0.694933
24	0.540127	0.491552	0.407069	0.362549	0.383122	0.454169	0.477063	0.487974	0.588746	0.400191	0.344831	0.493925	0.392429	0.362481	0.525189	0.41634	0.450445	0.291648	0.442563	0.386947	0.613542		0.38745	0.35237	0.42692	0.579569	0.440115	0.405691	0.5137	0.525873	0.56246	0.521271	0.518312	0.497248	0.30467	0.572702	0.40367	0.428657		0.415822	0.475424	0.496007	0.632956	0.446119	0.477063	0.487974	0.588746	0.580135	0.705131
25	0.530467	0.493353	0.427252	0.384219	0.366322	0.408535	0.476709	0.465655	0.565913	0.393052	0.327775	0.446961	0.388783	0.335984	0.510928	0.368101	0.449203	0.269411	0.448464	0.408999	0.588872		0.394835	0.345523	0.367888	0.552868	0.431273	0.39253	0.488579	0.467275	0.55298	0.55569	0.514662	0.504936	0.271728	0.572261	0.397988	0.454153		0.388004	0.469131	0.501956	0.607037	0.408456	0.476709	0.465655	0.565913	0.58948	0.723944
26	0.523046	0.460914	0.398801	0.373133	0.368388	0.406917	0.462175	0.470599	0.54101	0.40571	0.33078	0.443511	0.383116	0.326584	0.505076	0.365094	0.434877	0.28704	0.451104	0.374211	0.577089		0.374516	0.35535	0.404959	0.51587	0.44996	0.425849	0.467545	0.516018	0.546377	0.521955	0.51129	0.484639	0.277303	0.557111	0.368713	0.436662		0.379659	0.46344	0.499656	0.605163	0.423507	0.462175	0.470599	0.54101	0.559525	0.746827
27	0.509353	0.449762	0.403987	0.380553	0.37197	0.372466	0.491351	0.443844	0.563714	0.416819	0.339152	0.457623	0.366816	0.317194	0.501222	0.34244	0.431317	0.277693	0.411439	0.331802	0.571274		0.362949	0.322995	0.37266	0.534406	0.437364	0.366612	0.496323	0.545372	0.542377	0.517803	0.524062	0.493391	0.3009	0.569669	0.364522	0.427761		0.38303	0.453894	0.475075	0.600362	0.397275	0.491351	0.443844	0.563714	0.572122	0.734442
28	0.517177	0.464421	0.421079	0.367788	0.310389	0.41166	0.474762	0.413278	0.52714	0.379839	0.29686	0.433229	0.375976	0.296987	0.468426	0.357564	0.413485	0.23499	0.416804	0.330583	0.562493		0.392074	0.329612	0.356062	0.5458	0.416906	0.378499	0.457148	0.529036	0.521033	0.523447	0.502381	0.477009	0.230163	0.554321	0.322456	0.388512		0.375678	0.418588	0.469144	0.597735	0.39232	0.474762	0.413278	0.52714	0.546466	0.698551
29	0.526817	0.43239	0.391361	0.35014	0.359956	0.392766	0.453399	0.424633	0.514265	0.399121	0.30254	0.423376	0.36725	0.288803	0.468819	0.323829	0.429651	0.244797	0.402676	0.342891	0.547849		0.34378	0.308157	0.376877	0.52605	0.416726	0.351057	0.495627	0.515115	0.534104	0.527235	0.475531	0.479117	0.195775	0.507225	0.374706	0.411028		0.351929	0.419691	0.447764	0.605375	0.407071	0.453399	0.424633	0.514265	0.516325	0.658864
30	0.550998	0.438261	0.413246	0.340593	0.354632	0.365267	0.444188	0.439613	0.528525	0.376969	0.293961	0.421995	0.354727	0.275437	0.470274	0.338532	0.421916	0.257823	0.403505	0.353018	0.544195		0.367147	0.305427	0.354547	0.492733	0.402765	0.357389	0.499701	0.478775	0.495554	0.507639	0.429323	0.467876	0.236049	0.527106	0.320173	0.411179		0.344924	0.412461	0.460262	0.602289	0.381053	0.444188	0.439613	0.528525	0.515472	0.701305
31	0.517263	0.417079	0.389846	0.327765	0.344105	0.367734	0.445023	0.417112	0.522384	0.373358	0.270455	0.445258	0.365682	0.284216	0.451157	0.336805	0.399273	0.240821	0.380873	0.338072	0.552335		0.374896	0.310806	0.334176	0.515577	0.388733	0.348712	0.502333	0.459006	0.485451	0.498384	0.510322	0.4522	0.242628	0.546929	0.322977	0.417676		0.336571	0.422653	0.436124	0.607815	0.390643	0.445023	0.417112	0.522384	0.520157	0.683645
32	0.502116	0.418343	0.359895	0.313621	0.341998	0.367088	0.444503	0.387484	0.505834	0.39298	0.304049	0.41356	0.345927	0.278919	0.450172	0.314529	0.445643	0.263509	0.400995	0.331151	0.513135		0.339801	0.310139	0.323159	0.46506	0.383324	0.338012	0.519836	0.455565	0.534792	0.513625	0.476015	0.458841	0.25721	0.504675	0.298508	0.446693		0.344271	0.40222	0.425214	0.600918	0.392869	0.444503	0.387484	0.505834	0.510182	0.727216
33	0.490744	0.426726	0.369279	0.310513	0.293313	0.357066	0.424618	0.407848	0.483146	0.368152	0.273487	0.401098	0.336251	0.254064	0.4464	0.330017	0.377719	0.21983	0.370569	0.309575	0.481218		0.340474	0.312958	0.316791	0.487882	0.368395	0.328625	0.528588	0.459776	0.484847	0.484681	0.45811	0.493452	0.162658	0.505448	0.308928	0.415897		0.313182	0.394677	0.442034	0.572136	0.367849	0.424618	0.407848	0.483146	0.53607	0.699971
34	0.49116	0.410593	0.372125	0.326445	0.295327	0.342959	0.415438	0.404512	0.475133	0.36013	0.295179	0.376337	0.331245	0.240571	0.446989	0.324986	0.407616	0.233261	0.372603	0.322932	0.468657		0.346835	0.326058	0.313576	0.467427	0.369658	0.328407	0.518355	0.441204	0.519091	0.46233	0.445248	0.462037	0.16209	0.492281	0.283047	0.38879		0.276175	0.403135	0.429507	0.564608	0.359261	0.415438	0.404512	0.475133	0.500116	0.6922
35	0.485383	0.423011	0.362199	0.332811	0.298669	0.346401	0.396838	0.394556	0.489739	0.350986	0.257707	0.375455	0.335751	0.223417	0.42211	0.295965	0.417362	0.215316	0.375037	0.307862	0.493914		0.287292	0.299053	0.308752	0.477553	0.383441	0.313951	0.470504	0.402932	0.500774	0.482568	0.45173	0.477363	0.163296	0.462571	0.290203	0.35086		0.276074	0.410257	0.424042	0.573094	0.353861	0.396838	0.394556	0.489739	0.485304	0.712298
36	0.472897	0.422023	0.360473	0.327032	0.280875	0.335514	0.386334	0.393923	0.437423	0.364057	0.250582	0.354718	0.339489	0.207575	0.414495	0.295081	0.38149	0.204198	0.348896	0.300066	0.488227		0.327372	0.281271	0.291554	0.485943	0.355725	0.337818	0.506802	0.379604	0.48685	0.459726	0.419301	0.467296	0.145742	0.501586	0.274271	0.387003		0.286788	0.39366	0.42034	0.577245	0.348913	0.386334	0.393923	0.437423	0.473639	0.708146
37	0.466028	0.399233	0.354454	0.303415	0.267362	0.362539	0.360174	0.388056	0.462937	0.344484	0.221589	0.338348	0.32963	0.222859	0.416619	0.302108	0.393463	0.202384	0.367004	0.280675	0.488613		0.307158	0.28951	0.281083	0.473831	0.356257	0.331521	0.440297	0.389496	0.465182	0.453019	0.435516	0.443643	0.119597	0.533546	0.272904	0.410969		0.279139	0.38897	0.40218	0.571431	0.333391	0.360174	0.388056	0.462937	0.468651	0.723476
38	0.439256	0.377705	0.34557	0.285438	0.278379	0.314233	0.359886	0.348619	0.42189	0.363073	0.230216	0.33366	0.320241	0.20239	0.412165	0.350164	0.37947	0.191914	0.365963	0.272891	0.49377		0.305782	0.285479	0.267596	0.473576	0.340655	0.281712	0.476531	0.38616	0.474459	0.444159	0.382039	0.411072	0.123293	0.470921	0.267867	0.344041		0.285257	0.383798	0.399568	0.567961	0.348304	0.359886	0.348619	0.42189	0.470283	0.694013
39	0.453948	0.342292	0.360144	0.291715	0.285579	0.329292	0.353255	0.345512	0.413127	0.341638	0.238828	0.342253	0.320462	0.195993	0.409953	0.284859	0.374747	0.197004	0.339632	0.276333	0.458224		0.356791	0.267009	0.274129	0.42408	0.310197	0.283594	0.46413	0.36726	0.491455	0.445759	0.427969	0.392807	0.116987	0.482241	0.281558	0.347499		0.283528	0.369586	0.391081	0.567678	0.344285	0.353255	0.345512	0.413127	0.448935	0.680165
40	0.438177	0.362557	0.364756	0.28558	0.266395	0.311584	0.334457	0.355601	0.41661	0.317029	0.240254	0.340612	0.32053	0.175965	0.388763	0.294645	0.358883	0.190541	0.368962	0.267667	0.490253		0.314372	0.263202	0.276341	0.483304	0.330411	0.318003	0.459417	0.362416	0.444538	0.430408	0.43837	0.386224	0.0708363	0.428791	0.263977	0.315474		0.318425	0.362918	0.405617	0.563381	0.331079	0.334457	0.355601	0.41661	0.477992	0.663423
41	0.417539	0.34136	0.350945	0.294174	0.263792	0.281945	0.332834	0.333184	0.416362	0.298919	0.226041	0.361872	0.31493	0.202369	0.406826	0.297917	0.368309	0.182087	0.327823	0.267471	0.435417		0.332137	0.261265	0.248134	0.457052	0.308695	0.283962	0.464886	0.398943	0.456121	0.434328	0.436373	0.363927	0.123499	0.483961	0.282792	0.333916		0.309334	0.373129	0.396407	0.552413	0.357072	0.332834	0.333184	0.416362	0.483383	0.649353
42	0.422888	0.332373	0.346459	0.267677	0.263118	0.293331	0.316754	0.339899	0.409458	0.299345	0.218847	0.339261	0.309903	0.183796	0.379447	0.274725	0.36274	0.186251	0.32199	0.272342	0.416952		0.321454	0.257736	0.219259	0.464735	0.302126	0.25997	0.434247	0.431426	0.451672	0.420765	0.356914	0.336873	0.115356	0.441927	0.257536	0.29163		0.311651	0.349923	0.391778	0.553544	0.329706	0.316754	0.339899	0.409458	0.461428	0.624848
43	0.410703	0.317295	0.371	0.279732	0.272332	0.298962	0.31561	0.362254	0.427423	0.320913	0.193545	0.343546	0.296268	0.21579	0.397157	0.251803	0.373896	0.149623	0.327658	0.252776	0.443507		0.307491	0.254801	0.235748	0.485929	0.309124	0.241606	0.408859	0.388749	0.454408	0.41274	0.3712	0.351415	0.0935961	0.481358	0.248479	0.323212		0.300778	0.352239	0.371071	0.525567	0.343976	0.31561	0.362254	0.427423	0.44612	0.654672
44	0.387211	0.304282	0.356477	0.24214	0.223243	0.324019	0.308551	0.375673	0.424526	0.297091	0.21727	0.32686	0.30379	0.204615	0.387875	0.273556	0.355367	0.176432	0.334407	0.27628	0.417801		0.295667	0.271305	0.263932	0.457165	0.310888	0.267969	0.423717	0.370656	0.465542	0.420723	0.353323	0.343789	0.0758572	0.45893	0.271056	0.273261		0.277821	0.335635	0.371483	0.531289	0.324971	0.308551	0.375673	0.424526	0.427058	0.666343
45	0.384663	0.32887	0.367148	0.262235	0.238396	0.290916	0.306371	0.35609	0.388662	0.312156	0.228708	0.296082	0.295827	0.1884	0.375195	0.26504	0.384461	0.181248	0.299296	0.253376	0.389247		0.300576	0.260976	0.283127	0.439114	0.279857	0.25158	0.436609	0.356032	0.429045	0.376615	0.370724	0.370536	0.0263272	0.454501	0.216921	0.272948		0.2712	0.343316	0.374765	0.532383	0.331125	0.306371	0.35609	0.388662	0.446956	0.634565
46	0.389986	0.322785	0.36661	0.264527	0.203083	0.308823	0.317157	0.361461	0.390098	0.295213	0.198947	0.323697	0.304617	0.18571	0.361697	0.254872	0.339056	0.154491	0.331782	0.2528	0.412821		0.27078	0.270988	0.267708	0.473566	0.321095	0.252089	0.403769	0.343326	0.442337	0.379353	0.385926	0.37861	0.0708506	0.455371	0.206629	0.307525		0.286138	0.355063	0.361746	0.538021	0.331614	0.317157	0.361461	0.390098	0.426552	0.645581
47	0.386339	0.312264	0.349533	0.273377	0.234864	0.29113	0.301683	0.351001	0.413536	0.286145	0.205123	0.340475	0.284351	0.17792	0.356218	0.232141	0.352476	0.154513	0.288105	0.219473	0.401338		0.287452	0.25476	0.245955	0.420305	0.321455	0.253376	0.430495	0.345903	0.409367	0.336521	0.403972	0.343781	0.0655734	0.413493	0.244547	0.333913		0.283956	0.33608	0.357836	0.54767	0.311763	0.301683	0.351001	0.413536	0.425511	0.667079
48	0.373595	0.33696	0.351204	0.260789	0.223671	0.296999	0.334831	0.340491	0.424437	0.316019	0.220252	0.334656	0.295981	0.155147	0.36481	0.227074	0.342069	0.164102	0.30363	0.218669	0.405073		0.255937	0.238939	0.245218	0.412089	0.303297	0.254545	0.358172	0.370168	0.403288	0.391195	0.355562	0.348668	0.115327	0.464447	0.212657	0.293238		0.290257	0.337082	0.360148	0.539354	0.32685	0.334831	0.340491	0.424437	0.450708	0.639045
49	0.381533	0.353589	0.343767	0.259154	0.199541	0.285178	0.305699	0.3144	0.376913	0.30074	0.211147	0.320594	0.285986	0.165969	0.337606	0.270176	0.338087	0.171976	0.30595	0.221396	0.389023		0.263909	0.274946	0.223118	0.439755	0.325722	0.224191	0.418619	0.333243	0.394454	0.382885	0.313102	0.386788	0.100196	0.479209	0.258139	0.291143		0.295745	0.320262	0.363887	0.538202	0.296203	0.305699	0.3144	0.376913	0.441415	0.631991
50	0.37402	0.335621	0.338184	0.275589	0.20458	0.301483	0.327785	0.326527	0.387193	0.320855	0.215013	0.308393	0.29581	0.147461	0.351136	0.261923	0.331393	0.172559	0.293952	0.210036	0.421697		0.263666	0.253072	0.237579	0.413603	0.313973	0.2069	0.361147	0.356564	0.388784	0.383471	0.362205	0.354009	0.131168	0.465818	0.184821	0.279055		0.285326	0.342366	0.356483	0.554	0.292316	0.327785	0.326527	0.387193	0.46261	0.661048
51	0.395479	0.327244	0.34364	0.257213	0.182716	0.289464	0.309734	0.300653	0.397972	0.2916	0.184704	0.297553	0.264066	0.160105	0.342893	0.252588	0.336778	0.146797	0.347673	0.198222	0.397986		0.251064	0.228231	0.232208	0.420798	0.319089	0.219247	0.380922	0.345945	0.399112	0.368867	0.318062	0.322595	0.121042	0.458754	0.217011	0.287947		0.274512	0.328657	0.358242	0.563329	0.313619	0.309734	0.300653	0.397972	0.441444	0.645574
52	0.384311	0.339891	0.337189	0.270079	0.161229	0.263833	0.29674	0.313096	0.387438	0.302207	0.198561	0.310831	0.289082	0.159176	0.346612	0.259672	0.317456	0.172361	0.258036	0.205512	0.437913		0.267174	0.284003	0.238239	0.419484	0.290091	0.241851	0.431334	0.310478	0.422248	0.355191	0.308217	0.334526	0.0960269	0.508766	0.152421	0.206573		0.280012	0.315271	0.345355	0.568247	0.31248	0.29674	0.313096	0.387438	0.432969	0.605308
53	0.382578	0.336607	0.340879	0.271984	0.1837	0.267339	0.289636	0.311926	0.390728	0.304414	0.194575	0.281076	0.271965	0.196332	0.34981	0.256294	0.311111	0.148354	0.282615	0.199599	0.390839		0.246858	0.259813	0.226107	0.407204	0.302294	0.199464	0.393313	0.347518	0.379773	0.345102	0.339512	0.304639	0.088002	0.524365	0.175557	0.284428		0.281661	0.303787	0.335209	0.554486	0.294706	0.289636	0.311926	0.390728	0.421981	0.642284
54	0.362953	0.345376	0.356381	0.242324	0.183481	0.282347	0.293517	0.304985	0.357854	0.272905	0.207626	0.289497	0.278944	0.166176	0.326809	0.29122	0.298663	0.19019	0.282405	0.211304	0.378584		0.277554	0.239908	0.223217	0.424845	0.300837	0.172887	0.358391	0.332138	0.367795	0.349934	0.308115	0.332215	0.100801	0.405963	0.21185	0.235303		0.267309	0.314007	0.332941	0.543095	0.29596	0.293517	0.304985	0.357854	0.453784	0.640346
55	0.362817	0.353263	0.342175	0.265162	0.204631	0.261812	0.288197	0.317241	0.368586	0.306866	0.197324	0.281843	0.279773	0.149237	0.338557	0.272751	0.316452	0.166774	0.276465	0.178813	0.372589		0.231014	0.273022	0.235466	0.422277	0.276154	0.18103	0.378452	0.323757	0.364732	0.353984	0.350433	0.329117	0.107202	0.439731	0.19145	0.250716		0.247348	0.314747	0.323014	0.54099	0.291223	0.288197	0.317241	0.368586	0.414626	0.642252
56	0.346114	0.344702	0.35005	0.250914	0.190964	0.245594	0.267297	0.306468	0.373125	0.312717	0.172683	0.301729	0.277806	0.146554	0.324764	0.273932	0.313236	0.144999	0.280436	0.19077	0.392369		0.245919	0.239886	0.239137	0.393466	0.28931	0.184623	0.340319	0.34838	0.378924	0.340462	0.342024	0.341363	0.0578733	0.416935	0.183764	0.233604		0.240915	0.304421	0.332993	0.551813	0.293793	0.267297	0.306468	0.373125	0.420931	0.63744
57	0.33538	0.344951	0.358141	0.240931	0.177431	0.253765	0.275246	0.295669	0.365436	0.274905	0.150626	0.29354	0.284026	0.15308	0.321003	0.290183	0.297442	0.135336	0.273201	0.161449	0.371216		0.24399	0.237227	0.199581	0.397023	0.300855	0.173169	0.392247	0.271875	0.37444	0.372218	0.287377	0.28255	0.0273777	0.371018	0.176163	0.242787		0.246667	0.304257	0.329249	0.556812	0.290201	0.275246	0.295669	0.365436	0.408711	0.606118
58	0.33924	0.34826	0.334122	0.244999	0.131103	0.231115	0.27996	0.299748	0.366804	0.29138	0.161488	0.29514	0.268447	0.160184	0.308053	0.277431	0.304898	0.138728	0.252726	0.189083	0.336377		0.233586	0.213788	0.196896	0.392936	0.290313	0.198949	0.353418	0.286813	0.373301	0.328905	0.361144	0.300472	0.0414261	0.373717	0.164225	0.255366		0.25379	0.303139	0.330784	0.549488	0.283425	0.27996	0.299748	0.366804	0.404373	0.610206
59	0.325026	0.332051	0.361491	0.225279	0.161404	0.207953	0.252637	0.283256	0.353658	0.289781	0.17096	0.276473	0.244777	0.133125	0.30302	0.266508	0.304381	0.143451	0.256407	0.171568	0.340252		0.1837	0.253075	0.200876	0.409232	0.279883	0.179021	0.365703	0.263095	0.340203	0.326048	0.301465	0.304639	0.139205	0.418182	0.157712	0.214623		0.255138	0.316575	0.333631	0.535241	0.276464	0.252637	0.283256	0.353658	0.403801	0.617362
60	0.317862	0.33667	0.350204	0.227835	0.145702	0.212871	0.272038	0.2901	0.344462	0.310904	0.148817	0.29517	0.264299	0.147682	0.311568	0.330492	0.320638	0.141547	0.277201	0.178056	0.366853		0.232479	0.226012	0.212715	0.385761	0.281208	0.164519	0.36163	0.231925	0.359989	0.350227	0.348321	0.287652	0.0863237	0.430176	0.194703	0.211874		0.278856	0.288206	0.334994	0.541287	0.282961	0.272038	0.2901	0.344462	0.37959	0.632745
61	0.326086	0.331368	0.332081	0.225156	0.141797	0.211357	0.27655	0.299685	0.327496	0.26326	0.14879	0.283886	0.271417	0.128467	0.302158	0.29306	0.278765	0.132291	0.277634	0.166943	0.358427		0.232186	0.21503	0.221185	0.380006	0.257161	0.169872	0.355996	0.274905	0.348774	0.344045	0.325037	0.340234	0.0960169	0.37986	0.164351	0.221956		0.259594	0.293979	0.327881	0.577096	0.274767	0.27655	0.299685	0.327496	0.404134	0.643995
62	0.315521	0.318567	0.329901	0.229502	0.120175	0.183133	0.242942	0.300364	0.318912	0.274759	0.15735	0.281497	0.266697	0.139357	0.310775	0.309865	0.268475	0.153259	0.260398	0.17448	0.35097		0.237496	0.215725	0.202777	0.380989	0.246189	0.171153	0.35741	0.269211	0.319913	0.326698	0.288773	0.25724	0.0861966	0.414504	0.174718	0.232518		0.256619	0.298047	0.32226	0.535669	0.274672	0.242942	0.300364	0.318912	0.406027	0.64686
63	0.304228	0.278341	0.332191	0.208007	0.104076	0.19862	0.259799	0.316523	0.309791	0.303426	0.156646	0.298053	0.253245	0.131645	0.271551	0.270562	0.284353	0.134162	0.279014	0.193485	0.32315		0.214615	0.208565	0.17389	0.371088	0.238619	0.145009	0.340253	0.206166	0.353638	0.310886	0.340305	0.275673	0.129488	0.454086	0.144813	0.189135		0.260361	0.290213	0.334805	0.532165	0.236038	0.259799	0.316523	0.309791	0.370333	0.623525
64	0.318657	0.274775	0.340236	0.194592	0.126955	0.204815	0.252318	0.299264	0.307209	0.26728	0.174647	0.277654	0.274338	0.115575	0.28411	0.272236	0.275317	0.151247	0.242315	0.168045	0.279551		0.223225	0.201613	0.183914	0.348247	0.257782	0.168409	0.313368	0.250635	0.342103	0.308564	0.266493	0.276531	0.168959	0.429009	0.1615	0.221353		0.259552	0.272074	0.335693	0.516405	0.250849	0.252318	0.299264	0.307209	0.364018	0.626651
65	0.299831	0.285016	0.313617	0.189883	0.136553	0.200487	0.255046	0.289345	0.276297	0.31845	0.160747	0.260642	0.270206	0.126867	0.280576	0.314801	0.257063	0.144204	0.245264	0.17916	0.317023		0.238578	0.225571	0.187421	0.347886	0.274624	0.186751	0.306622	0.237807	0.346242	0.319056	0.31425	0.295533	0.115915	0.332382	0.146563	0.216812		0.238469	0.264917	0.319529	0.497299	0.259002	0.255046	0.289345	0.276297	0.356273	0.641606
66	0.297744	0.295467	0.288391	0.191764	0.11692	0.20269	0.244321	0.285915	0.297586	0.273048	0.146703	0.282805	0.266995	0.128164	0.266641	0.26531	0.284348	0.129297	0.265365	0.182608	0.323003		0.232941	0.199372	0.220033	0.312927	0.258953	0.176882	0.299229	0.273384	0.342278	0.338006	0.287549	0.272799	0.109769	0.343552	0.157998	0.227607		0.248425	0.287368	0.327129	0.513335	0.259901	0.244321	0.285915	0.297586	0.338578	0.607076
67	0.317505	0.271904	0.301626	0.197995	0.126518	0.178621	0.233933	0.307362	0.297807	0.270438	0.155667	0.276595	0.292696	0.11195	0.260235	0.230738	0.244802	0.137038	0.231593	0.182616	0.359197		0.202379	0.171887	0.194787	0.336699	0.268431	0.160437	0.2821	0.204173	0.321915	0.298845	0.305127	0.280996	0.136039	0.375457	0.183304	0.212506		0.251404	0.273829	0.326685	0.500969	0.256046	0.233933	0.307362	0.297807	0.348745	0.621643
68	0.324045	0.277566	0.302284	0.176928	0.143062	0.179072	0.22303	0.31745	0.31677	0.25667	0.147782	0.289529	0.274483	0.116889	0.245443	0.262523	0.270853	0.111641	0.254051	0.170473	0.33122		0.199144	0.201357	0.213608	0.329216	0.231708	0.195351	0.275659	0.243463	0.351188	0.330323	0.292873	0.284481	0.123658	0.326707	0.180662	0.23758		0.257245	0.278998	0.32453	0.49287	0.247461	0.22303	0.31745	0.31677	0.34925	0.640944
69	0.319772	0.257654	0.279804	0.180156	0.134452	0.176018	0.234618	0.307459	0.307825	0.244184	0.109758	0.272851	0.268509	0.116749	0.248962	0.266931	0.23497	0.102888	0.257097	0.159116	0.336284		0.227463	0.19013	0.158588	0.344658	0.259486	0.140431	0.259586	0.204268	0.362188	0.320189	0.290362	0.272714	0.143199	0.386728	0.152383	0.194382		0.272517	0.295205	0.346559	0.529036	0.251064	0.234618	0.307459	0.307825	0.332135	0.585642
70	0.306616	0.266992	0.263718	0.185887	0.102671	0.178501	0.208421	0.306622	0.309723	0.228375	0.093014	0.249519	0.261375	0.116277	0.250344	0.274964	0.263187	0.084289	0.249491	0.14408	0.334613		0.16749	0.164836	0.184476	0.332198	0.257046	0.180507	0.309084	0.256737	0.348	0.305312	0.282165	0.311609	0.154562	0.286779	0.167301	0.189749		0.268959	0.285053	0.326127	0.502908	0.231185	0.208421	0.306622	0.309723	0.360751	0.601189
71	0.301172	0.284444	0.249437	0.198431	0.141789	0.193357	0.216741	0.320688	0.32637	0.261759	0.116955	0.259624	0.268523	0.112223	0.23296	0.215233	0.257351	0.103473	0.241946	0.129147	0.312075		0.187105	0.1852	0.193786	0.34798	0.223895	0.155995	0.276193	0.226719	0.336881	0.319808	0.30638	0.289731	0.151258	0.303048	0.16366	0.139958		0.255688	0.272962	0.323563	0.496313	0.241888	0.216741	0.320688	0.32637	0.371598	0.615004
72	0.291895	0.275224	0.243898	0.201924	0.133625	0.186995	0.198282	0.312958	0.277193	0.254586	0.114805	0.235201	0.261639	0.0996651	0.253983	0.20294	0.264185	0.119581	0.226505	0.147518	0.278485		0.176624	0.145544	0.210609	0.359306	0.197891	0.190067	0.291936	0.227265	0.361137	0.302238	0.294737	0.264664	0.126899	0.257204	0.137638	0.172557		0.269727	0.262174	0.316257	0.512252	0.227025	0.198282	0.312958	0.277193	0.385969	0.638213
73	0.293999	0.279679	0.266366	0.183046	0.131325	0.166575	0.205455	0.312263	0.297381	0.267304	0.117595	0.241632	0.272896	0.109776	0.258805	0.246916	0.262142	0.0786064	0.222303	0.110286	0.294834		0.193003	0.146541	0.195202	0.350559	0.223734	0.179313	0.253648	0.274222	0.349515	0.302326	0.292861	0.272232	0.135272	0.353681	0.187684	0.172463		0.246091	0.270208	0.306816	0.500435	0.243589	0.205455	0.312263	0.297381	0.371517	0.588288
74	0.278865	0.28397	0.272038	0.179907	0.137388	0.169154	0.181174	0.299986	0.294328	0.260682	0.126862	0.251123	0.254516	0.119825	0.251333	0.239772	0.261988	0.108947	0.234879	0.144994	0.325814		0.179552	0.149718	0.217946	0.328985	0.187389	0.160625	0.294415	0.264763	0.316276	0.314826	0.271801	0.300562	0.102841	0.249181	0.158384	0.190697		0.232079	0.27545	0.303515	0.48532	0.220169	0.181174	0.299986	0.294328	0.38245	0.597854
75	0.294895	0.274257	0.276136	0.158085	0.111897	0.180473	0.189288	0.296478	0.331397	0.268797	0.106817	0.254081	0.27379	0.11083	0.244433	0.215164	0.251026	0.105683	0.223918	0.142552	0.326122		0.209567	0.214202	0.211566	0.333523	0.224787	0.175811	0.267631	0.253596	0.328464	0.312196	0.30787	0.261614	0.153511	0.250548	0.136214	0.157918		0.211458	0.264795	0.28393	0.491723	0.255464	0.189288	0.296478	0.331397	0.365472	0.602147
76	0.291334	0.271124	0.268715	0.153854	0.0784321	0.167404	0.181243	0.317826	0.313633	0.261708	0.118789	0.282821	0.231649	0.0917093	0.251789	0.201817	0.274626	0.110959	0.233452	0.138088	0.335516		0.166424	0.166248	0.215554	0.382242	0.220664	0.184617	0.246538	0.24926	0.327952	0.30017	0.239324	0.266215	0.052453	0.300733	0.130137	0.207086		0.232483	0.279053	0.293717	0.487392	0.223114	0.181243	0.317826	0.313633	0.403685	0.587132
77	0.298883	0.283687	0.254203	0.158473	0.10003	0.182795	0.181653	0.316441	0.333727	0.270373	0.0814012	0.282587	0.212771	0.119125	0.257469	0.219022	0.258146	0.078918	0.226312	0.140767	0.330772		0.162057	0.166082	0.208869	0.354013	0.187995	0.156618	0.262469	0.239331	0.327928	0.279551	0.281118	0.270129	0.12661	0.267751	0.142203	0.187789		0.203788	0.272242	0.305804	0.491759	0.230027	0.181653	0.316441	0.333727	0.370177	0.59977
78	0.290056	0.272878	0.271057	0.176669	0.100824	0.14197	0.174601	0.316367	0.321497	0.257883	0.0881762	0.304637	0.233719	0.0964599	0.238096	0.223132	0.253051	0.0811656	0.212607	0.144039	0.32605		0.149158	0.191064	0.20449	0.346893	0.219738	0.146418	0.263828	0.241827	0.338981	0.292059	0.220359	0.229221	0.084375	0.34593	0.147686	0.215451		0.216573	0.263899	0.30677	0.472718	0.232512	0.174601	0.316367	0.321497	0.375009	0.591975
79	0.284282	0.24762	0.263583	0.204167	0.0978089	0.127244	0.163567	0.30095	0.309763	0.254587	0.0928057	0.259287	0.223347	0.0970446	0.241155	0.191695	0.244686	0.103492	0.235319	0.128606	0.34616		0.17434	0.192832	0.210042	0.390711	0.188324	0.159875	0.268992	0.227587	0.340489	0.281546	0.276104	0.250515	0.150503	0.315966	0.164807	0.219585		0.224235	0.265784	0.300758	0.488278	0.235094	0.163567	0.30095	0.309763	0.368376	0.591451
80	0.276347	0.265817	0.24562	0.203829	0.105377	0.150637	0.162	0.308071	0.298137	0.244872	0.0894131	0.266536	0.22603	0.0897283	0.225872	0.192965	0.232017	0.0936771	0.190036	0.127935	0.275379		0.168247	0.173381	0.211344	0.31443	0.202554	0.177993	0.248566	0.262185	0.346169	0.296841	0.265769	0.267468	0.0872756	0.308327	0.134446	0.221824		0.211674	0.256484	0.308843	0.481067	0.221085	0.162	0.308071	0.298137	0.327656	0.564164
81	0.26344	0.271228	0.26974	0.204806	0.0868561	0.154834	0.170191	0.301607	0.313852	0.202511	0.0963891	0.227344	0.219994	0.0829761	0.240995	0.183662	0.22753	0.0943883	0.222818	0.134769	0.32651		0.161744	0.182027	0.224721	0.331881	0.173677	0.1421	0.286539	0.267806	0.335746	0.266915	0.258083	0.271671	0.130737	0.302713	0.134679	0.190931		0.22761	0.257949	0.303629	0.476649	0.236398	0.170191	0.301607	0.313852	0.335398	0.57363
82	0.268329	0.27082	0.254392	0.213406	0.0591463	0.223713	0.17403	0.273382	0.307674	0.268219	0.0736181	0.223292	0.238548	0.0910501	0.244423	0.237629	0.224467	0.0599898	0.208679	0.131412	0.315499		0.201161	0.181941	0.243262	0.340465	0.184909	0.156946	0.260795	0.273703	0.322485	0.278634	0.252865	0.254149	0.0784443	0.288459	0.138389	0.177079		0.240614	0.262513	0.299411	0.476739	0.220262	0.17403	0.273382	0.307674	0.340466	0.598536
83	0.278773	0.276655	0.212816	0.214157	0.0949956	0.197368	0.163771	0.301948	0.30269	0.233579	0.0798242	0.243965	0.228411	0.100766	0.242408	0.1978	0.23024	0.0939535	0.213648	0.119526	0.271278		0.207705	0.174852	0.245652	0.320527	0.157409	0.111767	0.258527	0.258497	0.319465	0.270554	0.30504	0.231217	0.086953	0.253788	0.129225	0.171613		0.237404	0.255173	0.296543	0.474512	0.207442	0.163771	0.301948	0.30269	0.354045	0.578983
84	0.279382	0.277808	0.223432	0.239927	0.1034	0.202766	0.158964	0.284087	0.305951	0.254523	0.0820274	0.234032	0.209022	0.0790665	0.247566	0.21765	0.239984	0.0759307	0.195976	0.110412	0.294089		0.162206	0.168633	0.239494	0.330272	0.1935	0.141408	0.258969	0.221837	0.334805	0.27456	0.289887	0.239235	0.0918395	0.290319	0.0798143	0.155706		0.21461	0.24802	0.292294	0.465955	0.199439	0.158964	0.284087	0.305951	0.354346	0.545102
85	0.294006	0.261083	0.267489	0.223578	0.0786577	0.212569	0.16775	0.291642	0.291634	0.262757	0.0801862	0.245825	0.219538	0.102988	0.248883	0.204345	0.22726	0.0647297	0.200883	0.101364	0.269017		0.191204	0.117313	0.244332	0.331352	0.172548	0.154906	0.241211	0.209231	0.340297	0.272777	0.274127	0.219738	0.106364	0.279348	0.12107	0.16032		0.224327	0.258942	0.27947	0.462227	0.198581	0.16775	0.291642	0.291634	0.32066	0.565047
86	0.269537	0.256368	0.265436	0.212994	0.0637171	0.184965	0.166797	0.283475	0.298467	0.2562	0.106927	0.23202	0.223602	0.092753	0.226278	0.206182	0.237983	0.0885752	0.198047	0.153365	0.307387		0.168522	0.172373	0.257413	0.345659	0.191531	0.134129	0.260291	0.281059	0.311173	0.281441	0.297926	0.198242	0.107267	0.317361	0.117329	0.168196		0.216198	0.239782	0.289141	0.490185	0.213363	0.166797	0.283475	0.298467	0.357801	0.559514
87	0.283775	0.271022	0.255925	0.227277	0.0607261	0.212228	0.140607	0.292622	0.285603	0.248372	0.0966275	0.244566	0.218968	0.107318	0.241869	0.229187	0.235227	0.0854539	0.205379	0.123455	0.317063		0.210057	0.145345	0.18073	0.312596	0.176749	0.145161	0.260629	0.267908	0.303152	0.254696	0.231011	0.192465	0.0926525	0.241265	0.101271	0.156766		0.217858	0.24375	0.265973	0.482705	0.19985	0.140607	0.292622	0.285603	0.339343	0.546056
88	0.282259	0.273581	0.25402	0.238353	0.066136	0.161197	0.136187	0.310214	0.300166	0.243913	0.0945756	0.207079	0.2129	0.0869199	0.237355	0.17136	0.214042	0.0650023	0.187878	0.140311	0.264448		0.20174	0.100222	0.187035	0.294964	0.155657	0.163818	0.230399	0.262686	0.313154	0.290974	0.276234	0.184185	0.0792129	0.277559	0.0837273	0.181258		0.228932	0.235039	0.249859	0.469049	0.20564	0.136187	0.310214	0.300166	0.319914	0.582595
89	0.259847	0.274789	0.243683	0.208312	0.0622711	0.184936	0.168763	0.307936	0.301913	0.241328	0.0577135	0.260273	0.217322	0.0909987	0.237602	0.133469	0.232701	0.067911	0.191793	0.101316	0.267702		0.193906	0.14698	0.213285	0.318232	0.188376	0.142095	0.261218	0.228961	0.302316	0.250042	0.275336	0.17635	0.150065	0.276929	0.105167	0.162173		0.204018	0.229981	0.26851	0.452583	0.190744	0.168763	0.307936	0.301913	0.336854	0.581558
90	0.277993	0.290618	0.237449	0.213447	0.0538707	0.157625	0.14763	0.316336	0.287712	0.213253	0.0956785	0.235692	0.183288	0.093663	0.230649	0.179555	0.22365	0.104631	0.179734	0.122803	0.260233		0.182002	0.127351	0.233077	0.31058	0.17931	0.136318	0.239882	0.252303	0.324688	0.264955	0.21895	0.197493	0.118212	0.265469	0.124265	0.173447		0.225736	0.237837	0.266301	0.476315	0.198715	0.14763	0.316336	0.287712	0.341214	0.534018
91	0.28303	0.26549	0.250542	0.234819	0.0572879	0.179256	0.154717	0.306894	0.310973	0.255497	0.0988073	0.209736	0.206401	0.0567942	0.225122	0.196518	0.242663	0.0915657	0.211575	0.0911164	0.286803		0.18969	0.138956	0.20188	0.301417	0.185652	0.156286	0.266658	0.215249	0.311411	0.276518	0.263164	0.153732	0.140604	0.271872	0.130077	0.149839		0.195552	0.222157	0.260408	0.455144	0.186588	0.154717	0.306894	0.310973	0.337304	0.547295
92	0.276957	0.273764	0.239771	0.23835	0.0614704	0.172136	0.169289	0.298218	0.306778	0.217503	0.104096	0.217692	0.211432	0.0703779	0.231785	0.164854	0.220734	0.0970992	0.210327	0.126821	0.279187		0.177796	0.120803	0.2036	0.338597	0.170817	0.168789	0.208493	0.248311	0.299904	0.254749	0.236526	0.185014	0.127117	0.23729	0.109885	0.148966		0.205462	0.223346	0.275561	0.478156	0.186719	0.169289	0.298218	0.306778	0.342599	0.551327
93	0.270953	0.27864	0.253766	0.22399	0.0845243	0.136569	0.163524	0.311183	0.281114	0.216795	0.0923394	0.220448	0.207859	0.0761606	0.22886	0.173288	0.226821	0.100722	0.158254	0.102283	0.30172		0.208629	0.172293	0.189181	0.287041	0.195772	0.142804	0.182041	0.176663	0.286851	0.260159	0.254211	0.190889	0.0934682	0.206745	0.0736564	0.135243		0.207418	0.215908	0.267427	0.473914	0.16297	0.163524	0.311183	0.281114	0.330528	0.542701
94	0.258054	0.29623	0.234467	0.22594	0.0706925	0.167991	0.158119	0.321587	0.308184	0.228019	0.0693063	0.223058	0.222635	0.0823037	0.206046	0.127966	0.229251	0.0812995	0.184238	0.113553	0.284813		0.20543	0.146377	0.203214	0.323396	0.169482	0.164226	0.19166	0.175673	0.292154	0.273469	0.212425	0.173542	0.0724002	0.223932	0.0871677	0.157301		0.208111	0.226961	0.285075	0.467025	0.199154	0.158119	0.321587	0.308184	0.308782	0.497961
95	0.277582	0.27243	0.225493	0.2354	0.0702947	0.180123	0.168295	0.327008	0.297497	0.221711	0.0775063	0.238216	0.204241	0.0796384	0.22573	0.155425	0.234885	0.0898127	0.150998	0.098414	0.268314		0.194718	0.149046	0.169945	0.306465	0.170138	0.185986	0.2226	0.231006	0.3158	0.258115	0.226617	0.146572	0.112261	0.243313	0.0805075	0.143139		0.204522	0.222678	0.26322	0.4816	0.193948	0.168295	0.327008	0.297497	0.289499	0.534229
96	0.276242	0.274248	0.216892	0.192877	0.0809903	0.18051	0.169975	0.326542	0.306425	0.235833	0.0667374	0.237109	0.215774	0.0798673	0.21705	0.154841	0.230782	0.0884635	0.138668	0.104022	0.28494		0.194066	0.135756	0.178071	0.293663	0.157401	0.133676	0.211558	0.195246	0.319002	0.243649	0.156788	0.20689	0.0922906	0.212691	0.0590645	0.121886		0.214496	0.221998	0.262679	0.469825	0.174891	0.169975	0.326542	0.306425	0.276606	0.506089
97	0.279317	0.279871	0.186437	0.193698	0.0734631	0.189714	0.153358	0.323398	0.290084	0.236406	0.0540083	0.273906	0.206673	0.0670905	0.208304	0.116983	0.2407	0.0662084	0.176756	0.106252	0.280983		0.193635	0.166088	0.159517	0.308485	0.151773	0.118816	0.219593	0.188446	0.284193	0.271291	0.236298	0.168251	0.0883356	0.202067	0.071741	0.134333		0.21593	0.220574	0.278537	0.458757	0.192783	0.153358	0.323398	0.290084	0.278289	0.535466
98	0.262545	0.267844	0.215051	0.198283	0.0400789	0.212706	0.159633	0.322561	0.298306	0.216524	0.0651403	0.242658	0.23024	0.0656878	0.202646	0.143595	0.231792	0.0825045	0.199875	0.0728862	0.273953		0.187003	0.168206	0.167187	0.274969	0.169201	0.130528	0.226497	0.174219	0.283318	0.263167	0.232503	0.170178	0.0550998	0.194403	0.0809368	0.171625		0.226578	0.211704	0.275564	0.460794	0.202628	0.159633	0.322561	0.298306	0.269481	0.501481
99	0.267944	0.247149	0.230163	0.197519	0.0591032	0.189315	0.169832	0.325206	0.283749	0.226634	0.0823831	0.220945	0.225632	0.0591883	0.19842	0.161318	0.221392	0.0948133	0.181919	0.0810782	0.256153		0.178437	0.147296	0.175951	0.303721	0.141504	0.116012	0.263533	0.175488	0.316901	0.245203	0.183955	0.169954	0.0556245	0.20504	0.0847487	0.1294		0.232942	0.213523	0.285545	0.457313	0.213214	0.169832	0.325206	0.283749	0.291663	0.509454
100	0.282466	0.25269	0.233109	0.173634	0.0668003	0.192024	0.167909	0.324059	0.268146	0.189441	0.0445661	0.224577	0.229362	0.0769603	0.192894	0.175823	0.217861	0.0784766	0.168982	0.0861911	0.285988		0.178175	0.134719	0.142311	0.310284	0.170863	0.13877	0.258533	0.144761	0.307807	0.249241	0.208199	0.208566	0.114831	0.194687	0.0453532	0.150449		0.229624	0.227596	0.283987	0.468818	0.196808	0.167909	0.324059	0.268146	0.301267	0.553999
101	0.273982	0.245482	0.235986	0.206615	0.073178	0.195129	0.160345	0.355027	0.244429	0.208041	0.0477256	0.213548	0.222583	0.0549718	0.176033	0.168543	0.190538	0.0940516	0.171662	0.0677118	0.261878		0.199682	0.124362	0.156412	0.274781	0.134381	0.145845	0.253376	0.178387	0.318082	0.245781	0.174771	0.194799	0.00104637	0.196129	0.0414349	0.154238		0.254023	0.236106	0.285493	0.469304	0.206235	0.160345	0.355027	0.244429	0.291301	0.538678
102	0.264084	0.271592	0.235361	0.174537	0.0507306	0.185399	0.172327	0.324531	0.276961	0.18461	0.0338498	0.226924	0.205022	0.0719728	0.203816	0.17907	0.205964	0.0710164	0.169614	0.0546128	0.284123		0.227003	0.112554	0.142163	0.26945	0.132342	0.131517	0.278817	0.155043	0.30218	0.256888	0.202491	0.170638	0.0639667	0.207324	0.0421082	0.123728		0.262192	0.227719	0.279765	0.463845	0.210025	0.172327	0.324531	0.276961	0.295865	0.529826
103	0.265491	0.262975	0.225275	0.168597	0.0687166	0.218614	0.162033	0.312214	0.310422	0.196934	0.047642	0.239251	0.206717	0.0473162	0.18442	0.162608	0.212686	0.0801026	0.147458	0.0639621	0.310788		0.176987	0.106667	0.153494	0.28379	0.124086	0.128582	0.193453	0.169812	0.283842	0.228318	0.177634	0.18438	-0.00165317	0.118629	0.0401889	0.145047		0.251039	0.223766	0.297327	0.472275	0.19228	0.162033	0.312214	0.310422	0.303621	0.519486
104	0.277813	0.255659	0.248467	0.174783	0.0492694	0.190482	0.164579	0.338151	0.291063	0.204547	0.0347502	0.233221	0.218123	0.0734072	0.182264	0.170626	0.227422	0.0619776	0.158679	0.0696941	0.30965		0.175374	0.122133	0.130388	0.282218	0.172113	0.154001	0.23205	0.195037	0.253221	0.24132	0.185625	0.156877	0.0640757	0.165554	0.0146314	0.129932		0.250475	0.230856	0.288949	0.468725	0.185576	0.164579	0.338151	0.291063	0.302737	0.534165
105	0.270135	0.265456	0.243022	0.181727	0.0534997	0.20673	0.147639	0.318316	0.284226	0.184554	0.0677593	0.241596	0.202651	0.0937408	0.189545	0.123326	0.231869	0.0947211	0.190923	0.0890157	0.280116		0.181109	0.153253	0.121007	0.260084	0.139392	0.126182	0.215093	0.191469	0.283576	0.247246	0.199479	0.161805	-0.0370101	0.201076	0.0328947	0.14435		0.231925	0.226439	0.296786	0.467677	0.198692	0.147639	0.318316	0.284226	0.315848	0.525033
106	0.284998	0.246464	0.228512	0.191595	0.0276499	0.206892	0.162908	0.327374	0.272574	0.187949	0.0741704	0.232512	0.194086	0.066397	0.171547	0.107968	0.241996	0.0894639	0.141739	0.0530867	0.269249		0.154733	0.135806	0.128271	0.225231	0.165756	0.0965824	0.251672	0.169708	0.246229	0.215827	0.191084	0.149324	0.0673985	0.206311	0.0691147	0.14407		0.225469	0.243329	0.274834	0.483332	0.20279	0.162908	0.327374	0.272574	0.315168	0.504207
107	0.26951	0.238919	0.247338	0.172929	0.0604859	0.211022	0.136821	0.328398	0.277416	0.1901	0.0432175	0.22353	0.209889	0.0678245	0.174995	0.123886	0.249014	0.0720503	0.16487	0.0673003	0.286958		0.188383	0.124726	0.131984	0.252889	0.163597	0.137848	0.229014	0.183739	0.252718	0.243595	0.175762	0.185644	0.0812613	0.179955	0.0536964	0.168589		0.2449	0.225382	0.28731	0.46605	0.201884	0.136821	0.328398	0.277416	0.286308	0.532725
108	0.284256	0.24068	0.231695	0.180879	0.0485549	0.213827	0.168323	0.302279	0.248348	0.236116	0.0537175	0.222648	0.235057	0.0658387	0.195711	0.125525	0.252855	0.063453	0.153907	0.0521589	0.276015		0.190847	0.137418	0.119457	0.22877	0.168697	0.139726	0.256316	0.181488	0.255319	0.230964	0.167895	0.157178	0.0553192	0.145616	0.100488	0.16542		0.241871	0.222284	0.262307	0.468223	0.181337	0.168323	0.302279	0.248348	0.262591	0.482187
109	0.258629	0.237683	0.22633	0.187499	0.0375627	0.215761	0.145679	0.296774	0.286502	0.2232	0.0568647	0.20398	0.215036	0.0719895	0.183215	0.122771	0.255484	0.0704655	0.160393	0.0532698	0.293741		0.182758	0.120864	0.100693	0.228719	0.148143	0.13163	0.240749	0.153804	0.228502	0.246223	0.16362	0.143223	0.108728	0.203185	0.107582	0.13575		0.224628	0.232139	0.284459	0.472672	0.193619	0.145679	0.296774	0.286502	0.282492	0.492733
110	0.263332	0.229328	0.225276	0.179023	0.0362909	0.195011	0.16421	0.318443	0.290457	0.18497	0.0494856	0.215523	0.235916	0.0643418	0.200343	0.119575	0.220627	0.0628005	0.138107	0.0513336	0.27551		0.177263	0.10758	0.135002	0.270391	0.170638	0.12207	0.250985	0.175507	0.248345	0.25673	0.161505	0.136803	0.0605326	0.263987	0.0646049	0.165574		0.217763	0.231107	0.267735	0.457169	0.21147	0.16421	0.318443	0.290457	0.277391	0.514667
111	0.258828	0.228847	0.237639	0.167701	0.0592378	0.204579	0.162024	0.306269	0.284723	0.205698	0.0403117	0.210976	0.207855	0.0804995	0.179532	0.108374	0.239776	0.0453193	0.148154	0.0498029	0.266709		0.181629	0.16698	0.093428	0.223629	0.159784	0.138242	0.220176	0.164001	0.264108	0.220763	0.176969	0.157982	0.146415	0.213391	0.0659181	0.144226		0.232398	0.217232	0.268178	0.448198	0.190768	0.162024	0.306269	0.284723	0.261705	0.552048
112	0.260905	0.212441	0.264704	0.180581	0.052237	0.167356	0.137586	0.297656	0.28622	0.180723	0.0406844	0.188249	0.220981	0.0753248	0.18915	0.0879579	0.233405	0.06516	0.128758	0.0579706	0.21839		0.184005	0.148474	0.0950541	0.25321	0.165993	0.128969	0.208656	0.185285	0.253289	0.244166	0.183633	0.155969	0.0596703	0.254902	0.0466212	0.118604		0.222086	0.204793	0.246526	0.453232	0.20432	0.137586	0.297656	0.28622	0.255035	0.534111
113	0.220306	0.199336	0.223964	0.175234	0.0369185	0.176144	0.109811	0.274504	0.294737	0.167603	0.0516742	0.178925	0.21608	0.101	0.190115	0.120749	0.259721	0.0559817	0.142746	0.0747642	0.282268		0.233241	0.161152	0.0844294	0.229786	0.137389	0.115105	0.195464	0.180201	0.214186	0.220321	0.156761	0.144744	0.0593144	0.20646	0.0565015	0.133909		0.210015	0.221011	0.257574	0.443412	0.194729	0.109811	0.274504	0.294737	0.271059	0.569114
114	0.224354	0.19037	0.188463	0.165086	0.0511899	0.163199	0.119786	0.271088	0.29625	0.170919	0.0339999	0.173287	0.212213	0.0804445	0.169532	0.0890267	0.235858	0.0405704	0.134199	0.073387	0.264766		0.185473	0.156192	0.082289	0.264279	0.167141	0.143051	0.240989	0.142924	0.228489	0.227971	0.187828	0.189031	0.0409538	0.189562	0.0535682	0.152871		0.200109	0.230128	0.266344	0.43431	0.194963	0.119786	0.271088	0.29625	0.252718	0.593681
115	0.221667	0.201392	0.206536	0.179132	0.056251	0.167549	0.113574	0.288924	0.280231	0.173624	0.0406116	0.225409	0.227324	0.0952653	0.173841	0.131955	0.240284	0.0576337	0.118414	0.0644119	0.267832		0.17762	0.13773	0.0711593	0.210569	0.175795	0.10524	0.195835	0.148532	0.228261	0.207778	0.161021	0.15603	0.055427	0.16728	0.0421966	0.132038		0.209877	0.224378	0.283924	0.448675	0.205477	0.113574	0.288924	0.280231	0.25115	0.553343
116	0.234349	0.17019	0.210759	0.181068	0.0359084	0.193896	0.112651	0.301406	0.309899	0.162465	0.0528521	0.220016	0.232751	0.119119	0.186868	0.135754	0.212766	0.0618085	0.142175	0.0595118	0.244933		0.178079	0.12843	0.0573163	0.217588	0.153795	0.109088	0.249908	0.147976	0.21925	0.215387	0.187319	0.157288	0.0508462	0.256373	0.00592236	0.129429		0.207807	0.21509	0.260703	0.431073	0.192983	0.112651	0.301406	0.309899	0.264173	0.54116
117	0.235154	0.201361	0.214331	0.193915	0.0575102	0.193493	0.108842	0.289213	0.278719	0.131806	0.0370546	0.202371	0.239053	0.0695725	0.178127	0.134319	0.219457	0.0484397	0.144535	0.053118	0.233165		0.167165	0.0992951	0.076988	0.20991	0.171578	0.126593	0.206104	0.159137	0.249356	0.21872	0.165553	0.185957	-0.002473	0.203854	0.0250554	0.17183		0.193375	0.208486	0.275723	0.452758	0.1921	0.108842	0.289213	0.278719	0.240804	0.528527
118	0.250309	0.176869	0.201719	0.192576	0.0521609	0.164524	0.11403	0.286694	0.288132	0.167167	0.0468826	0.20354	0.247851	0.0823679	0.176009	0.165304	0.215741	0.068361	0.125972	0.0463472	0.256573		0.172785	0.132743	0.128974	0.220448	0.143839	0.0952564	0.202259	0.181622	0.238203	0.223196	0.179112	0.133947	0.0239473	0.231068	0.035223	0.176568		0.192751	0.225247	0.26779	0.455995	0.206053	0.11403	0.286694	0.288132	0.2426	0.546665
119	0.234749	0.170969	0.207982	0.194066	0.0255009	0.139221	0.110154	0.292409	0.300081	0.180295	0.0404907	0.22189	0.235655	0.058575	0.167951	0.0900847	0.2311	0.0514788	0.128112	0.040796	0.223098		0.192206	0.1252	0.126817	0.250789	0.116023	0.0691584	0.246687	0.176927	0.246008	0.218537	0.171752	0.162963	-0.0199211	0.224659	0.0507545	0.160151		0.193796	0.205302	0.242623	0.436451	0.202607	0.110154	0.292409	0.300081	0.253304	0.562592
120	0.242494	0.150474	0.206979	0.193973	0.0436129	0.150102	0.111975	0.280353	0.272181	0.186718	0.0268875	0.223709	0.20982	0.0869576	0.168548	0.14052	0.228097	0.0465938	0.136501	0.0474045	0.22101		0.189714	0.127006	0.11021	0.22267	0.153077	0.101997	0.176221	0.169935	0.191835	0.220223	0.148219	0.168991	0.0272233	0.27919	0.0619145	0.167024		0.189348	0.193061	0.261088	0.433652	0.206624	0.111975	0.280353	0.272181	0.275348	0.583905
121	0.225279	0.155442	0.19601	0.1863	0.0295021	0.142746	0.11412	0.281332	0.27944	0.153415	0.0401643	0.192279	0.213949	0.0816697	0.175463	0.122983	0.227927	0.053325	0.121243	0.0490877	0.268175		0.188349	0.114704	0.0943296	0.223206	0.144402	0.0815897	0.224597	0.183326	0.208236	0.221591	0.163742	0.177288	0.0199688	0.200119	0.0580896	0.135569		0.197483	0.186615	0.2651	0.450854	0.206914	0.11412	0.281332	0.27944	0.245222	0.581876
122	0.238081	0.166563	0.203391	0.176537	0.0117475	0.173222	0.108124	0.296474	0.31898	0.163571	0.0085598	0.18231	0.232659	0.0954625	0.179148	0.157029	0.241374	0.0292537	0.134348	0.0579636	0.262588		0.160889	0.12968	0.107193	0.191068	0.138925	0.08519	0.220773	0.130317	0.210764	0.222659	0.161011	0.150308	-0.00637926	0.224941	0.0703363	0.177901		0.21074	0.172099	0.263392	0.466796	0.200336	0.108124	0.296474	0.31898	0.307821	0.558013
123	0.246374	0.17527	0.19019	0.170841	0.00941684	0.153094	0.110465	0.315517	0.290955	0.166747	0.0458647	0.186111	0.221697	0.0999654	0.154436	0.119629	0.206099	0.05476	0.122248	0.0579433	0.239326		0.171494	0.126735	0.0619708	0.202552	0.148371	0.112656	0.198659	0.145246	0.214562	0.219023	0.147142	0.165554	-0.030237	0.231303	0.0546048	0.15101		0.201471	0.176644	0.246685	0.459426	0.197619	0.110465	0.315517	0.290955	0.269866	0.557015
124	0.223885	0.20484	0.218826	0.148049	0.0376474	0.16574	0.111331	0.317647	0.323221	0.156896	0.0190209	0.178481	0.222016	0.104688	0.159924	0.145836	0.224442	0.0463469	0.174672	0.0487743	0.192004		0.18356	0.119256	0.0772905	0.195967	0.15463	0.110989	0.201192	0.173876	0.204747	0.228652	0.164293	0.131246	0.0390058	0.19593	0.0586087	0.17034		0.194737	0.165378	0.230557	0.450083	0.222412	0.111331	0.317647	0.323221	0.26466	0.551378
125	0.232079	0.195497	0.166334	0.1593	0.00630891	0.122532	0.108633	0.307295	0.284282	0.173573	0.0386966	0.197779	0.251112	0.0965616	0.154141	0.0754329	0.226506	0.0493892	0.114451	0.0485346	0.225571		0.179305	0.0927493	0.0558958	0.18396	0.14782	0.0846337	0.215448	0.150955	0.224172	0.19985	0.149051	0.179943	0.0211348	0.197275	0.0669027	0.150899		0.21361	0.184216	0.223816	0.445424	0.197115	0.108633	0.307295	0.284282	0.268732	0.535961
126	0.244822	0.194721	0.201571	0.166482	0.0141884	0.155719	0.115983	0.328864	0.277855	0.164586	0.0190695	0.171328	0.197243	0.0939237	0.145971	0.0928027	0.212965	0.0355442	0.154395	0.0538088	0.277413		0.193141	0.116053	0.0654139	0.242777	0.154256	0.0696198	0.242	0.152893	0.180755	0.195717	0.167519	0.164254	-0.00138642	0.207147	0.0363312	0.150506		0.214675	0.166834	0.226315	0.46028	0.190588	0.115983	0.328864	0.277855	0.273603	0.578602
127	0.235	0.194746	0.191473	0.200663	0.0126782	0.129654	0.122753	0.286907	0.295732	0.160906	0.034464	0.160827	0.240999	0.0658812	0.155831	0.120435	0.223381	0.0544738	0.130059	0.0615026	0.213736		0.16795	0.136338	0.0842745	0.198726	0.154374	0.0744069	0.163224	0.171635	0.191693	0.216597	0.19541	0.209083	0.0119735	0.198404	0.0613023	0.154412		0.219218	0.182401	0.239968	0.440629	0.192163	0.122753	0.286907	0.295732	0.254239	0.544394
128	0.224113	0.182254	0.162988	0.172636	0.0352066	0.165386	0.129331	0.283521	0.303798	0.18308	0.00736562	0.152166	0.212437	0.0942078	0.156831	0.0989402	0.215429	0.0429131	0.128546	0.0478197	0.256407		0.180666	0.144736	0.0558489	0.23364	0.165877	0.0777938	0.196921	0.135059	0.190984	0.216247	0.175576	0.151641	0.0300633	0.175742	0.0393149	0.154486		0.203358	0.185418	0.228123	0.432885	0.192029	0.129331	0.283521	0.303798	0.240007	0.53007
129	0.236931	0.180368	0.192526	0.197377	0.0413972	0.129309	0.125599	0.272762	0.2816	0.133426	0.0369826	0.157998	0.236383	0.0796158	0.142985	0.105079	0.19675	0.0509703	0.0941146	0.0336769	0.225674		0.14972	0.0988179	0.0526974	0.23442	0.153388	0.0884257	0.180694	0.157828	0.190697	0.204966	0.160349	0.154955	0.0552501	0.238121	0.0424925	0.166315		0.195181	0.176242	0.23306	0.447313	0.194642	0.125599	0.272762	0.2816	0.238855	0.561549
130	0.237882	0.186991	0.177088	0.17773	0.0200129	0.139577	0.137643	0.25671	0.285446	0.160495	0.0384339	0.15951	0.230826	0.0957681	0.134138	0.155322	0.238301	0.0503202	0.133272	0.0620722	0.211867		0.190662	0.118245	0.0683126	0.229385	0.140862	0.0395512	0.220813	0.13026	0.186488	0.199746	0.173693	0.153579	0.048468	0.249536	0.0468	0.149964		0.195349	0.167848	0.215476	0.447235	0.199681	0.137643	0.25671	0.285446	0.228883	0.534108
131	0.235986	0.174214	0.168365	0.215038	0.0154446	0.151455	0.111415	0.245122	0.311888	0.163275	0.00944374	0.167277	0.216714	0.100003	0.130794	0.104066	0.20572	0.0247435	0.111637	0.0467657	0.22727		0.139498	0.102576	0.0531003	0.211923	0.146054	0.0832015	0.176523	0.141695	0.167558	0.179547	0.209806	0.159739	0.0438681	0.218981	0.0544538	0.138545		0.191379	0.156841	0.218381	0.442959	0.206655	0.111415	0.245122	0.311888	0.210727	0.562165
132	0.220726	0.170007	0.199394	0.194904	0.0307862	0.177948	0.138615	0.259374	0.285805	0.189456	-0.012561	0.168267	0.18776	0.0958867	0.118294	0.132051	0.205359	0.0100399	0.153367	0.0630504	0.254857		0.176684	0.106929	0.0238231	0.193328	0.147774	0.101482	0.205022	0.152937	0.190263	0.216143	0.1343	0.15549	-0.0372591	0.207321	0.0447591	0.131544		0.170768	0.177748	0.235902	0.442489	0.19698	0.138615	0.259374	0.285805	0.239787	0.590044
133	0.213766	0.176009	0.20295	0.17919	0.0222539	0.193829	0.120832	0.256164	0.297142	0.155955	-0.003456	0.166278	0.202326	0.0678081	0.151366	0.111407	0.207617	0.0201688	0.135834	0.0499716	0.203963		0.190047	0.121066	0.0287054	0.192812	0.137206	0.115222	0.151137	0.157659	0.171569	0.214242	0.173981	0.155674	0.0150771	0.191717	0.0558359	0.110079		0.191551	0.17828	0.224972	0.453374	0.189433	0.120832	0.256164	0.297142	0.240065	0.559073
134	0.219928	0.20894	0.178423	0.177149	0.0236939	0.15945	0.125753	0.245056	0.283936	0.158559	-0.000718608	0.198085	0.195185	0.087591	0.124247	0.0538542	0.218619	0.0239333	0.150665	0.0832428	0.230613		0.158728	0.13073	0.0200472	0.174195	0.136647	0.0800785	0.176398	0.139926	0.169181	0.199653	0.219288	0.137157	0.080204	0.17449	0.0423473	0.131941		0.195765	0.167005	0.217953	0.441388	0.17351	0.125753	0.245056	0.283936	0.239814	0.568563
135	0.210562	0.202013	0.177598	0.177631	0.0310037	0.145036	0.153986	0.245719	0.276311	0.131819	0.00900983	0.191179	0.212852	0.0784558	0.128311	0.0857271	0.225254	0.0329271	0.109744	0.0715254	0.212883		0.180922	0.119792	0.039107	0.162177	0.12206	0.0777803	0.140176	0.132004	0.209571	0.178917	0.214483	0.105406	0.0202534	0.251886	0.0214907	0.122873		0.211327	0.163616	0.21092	0.43388	0.194357	0.153986	0.245719	0.276311	0.232321	0.562257
136	0.234981	0.187939	0.184035	0.163136	0.0651167	0.154676	0.12737	0.229286	0.282985	0.157485	0.00892779	0.157323	0.208084	0.0778829	0.126849	0.0968888	0.213899	0.0273666	0.112448	0.0447099	0.188389		0.186039	0.124976	0.0451493	0.197546	0.10563	0.0549654	0.146556	0.151489	0.170181	0.183332	0.168984	0.134906	0.0535347	0.167705	0.0308057	0.134655		0.197497	0.151196	0.185345	0.431881	0.184047	0.12737	0.229286	0.282985	0.261931	0.553611
137	0.209616	0.19505	0.162729	0.18227	0.0404264	0.142679	0.154881	0.221906	0.252097	0.129237	0.0274406	0.163709	0.201203	0.0822279	0.112248	0.111762	0.213228	0.0348397	0.0818671	0.0529438	0.206348		0.184992	0.122175	0.0530165	0.191321	0.130232	0.113195	0.161139	0.121238	0.171677	0.196552	0.140543	0.101558	0.026228	0.191369	0.0599419	0.121656		0.201426	0.154746	0.222804	0.418938	0.199877	0.154881	0.221906	0.252097	0.230257	0.560486
138	0.215769	0.195047	0.16987	0.180509	0.0105697	0.166556	0.15701	0.238325	0.26167	0.150581	0.0240411	0.192263	0.2338	0.0602475	0.125291	0.105074	0.21886	0.0245261	0.0814329	0.0522545	0.225462		0.180354	0.118424	0.038624	0.210318	0.116962	0.0963729	0.144516	0.135372	0.15326	0.164481	0.145844	0.131378	-0.0084962	0.224141	0.0587026	0.121725		0.21621	0.165985	0.207829	0.420971	0.191708	0.15701	0.238325	0.26167	0.225577	0.543749
139	0.190501	0.204936	0.165372	0.185041	0.0382789	0.152498	0.161727	0.245847	0.285022	0.164034	0.0121411	0.166957	0.210851	0.0909756	0.120651	0.0873972	0.210079	0.0343002	0.114357	0.0743935	0.203137		0.168589	0.105482	0.0525405	0.20565	0.101124	0.0885419	0.144725	0.159787	0.170331	0.158565	0.151959	0.0802176	-0.010004	0.249714	0.037514	0.117601		0.224819	0.176358	0.189736	0.443848	0.19808	0.161727	0.245847	0.285022	0.252545	0.513186
140	0.201565	0.19253	0.16095	0.172108	-0.00867489	0.138148	0.162737	0.268187	0.29008	0.148985	0.0392896	0.173354	0.222564	0.0893824	0.138382	0.0940078	0.198261	0.0420696	0.142141	0.0437546	0.22007		0.194839	0.126266	0.0785794	0.183631	0.135922	0.0632387	0.148233	0.181629	0.185887	0.178812	0.121399	0.0942532	0.0243163	0.220184	0.0443922	0.101769		0.216107	0.175899	0.195614	0.445259	0.201452	0.162737	0.268187	0.29008	0.239739	0.551089
141	0.170406	0.201851	0.169125	0.172858	0.042621	0.103803	0.16417	0.281612	0.255835	0.158733	0.0458807	0.151002	0.210818	0.0752574	0.125408	0.0947374	0.218961	0.03254	0.122372	0.0494217	0.231489		0.179477	0.116732	0.0745202	0.185626	0.131685	0.0729698	0.162987	0.115771	0.166083	0.165872	0.136836	0.0661587	-0.00591599	0.22909	0.0777533	0.131945		0.197598	0.161564	0.202228	0.432162	0.19766	0.16417	0.281612	0.255835	0.254676	0.533564
142	0.187599	0.208086	0.16165	0.163924	0.0570473	0.147763	0.185851	0.266114	0.25179	0.144146	0.030908	0.175781	0.213327	0.0903398	0.123663	0.104197	0.231044	0.0313201	0.103211	0.0478844	0.191655		0.16389	0.0915379	0.107936	0.193318	0.120484	0.0521405	0.203991	0.132261	0.1908	0.152883	0.151422	0.0986908	0.0401251	0.210644	0.0345521	0.114555		0.195382	0.170155	0.207989	0.444004	0.181407	0.185851	0.266114	0.25179	0.23252	0.55584
143	0.18793	0.199706	0.190896	0.165268	0.0295679	0.138256	0.187682	0.247496	0.282524	0.159151	0.0245204	0.181681	0.209285	0.0897925	0.147508	0.130121	0.205288	0.0161056	0.115803	0.0301621	0.224223		0.193766	0.0642864	0.0939622	0.157821	0.109793	0.0520234	0.156574	0.142257	0.178806	0.166215	0.160897	0.0775143	0.00568313	0.174024	0.0503483	0.0828601		0.18994	0.151545	0.222265	0.44536	0.190357	0.187682	0.247496	0.282524	0.237039	0.56666
144	0.18056	0.18615	0.168465	0.184005	0.0475827	0.140414	0.179027	0.254775	0.262696	0.165981	0.000416329	0.169748	0.223042	0.0616288	0.115728	0.100036	0.211396	0.0385819	0.0924363	0.0523673	0.194174		0.137505	0.0954652	0.0780112	0.171882	0.107754	0.0812654	0.132167	0.159611	0.169847	0.194348	0.135736	0.111497	-0.0291303	0.181749	0.0154988	0.0741493		0.193156	0.166786	0.216487	0.4407	0.187529	0.179027	0.254775	0.262696	0.236456	0.5498
145	0.192227	0.195981	0.178194	0.158396	0.00815663	0.107074	0.166679	0.260771	0.277528	0.159003	0.0193744	0.157922	0.208318	0.034015	0.119908	0.0780821	0.213684	0.0397671	0.123799	0.034019	0.231859		0.174212	0.0925449	0.0736634	0.119139	0.0993621	0.0556304	0.109184	0.158929	0.175206	0.183378	0.181218	0.100249	-0.00395362	0.147341	0.0274286	0.171538		0.198006	0.153194	0.209659	0.443342	0.200085	0.166679	0.260771	0.277528	0.235951	0.532308
146	0.192927	0.216578	0.187263	0.156437	0.0558464	0.125511	0.175541	0.249138	0.273857	0.181038	0.00475879	0.164798	0.190835	0.0720067	0.153055	0.102528	0.214377	0.0160174	0.10389	0.0565269	0.214525		0.164967	0.0845861	0.0597726	0.134833	0.0998022	0.061179	0.168331	0.156561	0.182735	0.175115	0.195489	0.0905633	0.0631616	0.145938	0.0346569	0.121671		0.19115	0.179003	0.207467	0.439223	0.16862	0.175541	0.249138	0.273857	0.232699	0.490067
147	0.19203	0.192083	0.175201	0.178964	0.0592308	0.13916	0.16527	0.240909	0.262741	0.157843	-0.00977432	0.171824	0.190932	0.0488962	0.130872	0.10494	0.211857	0.00514784	0.120359	0.0433068	0.255948		0.189861	0.0853597	0.0548062	0.168521	0.106378	0.055945	0.138227	0.140799	0.152501	0.193044	0.148012	0.0773618	0.0200379	0.218039	0.0484627	0.11336		0.200731	0.179906	0.211411	0.437945	0.193302	0.16527	0.240909	0.262741	0.255324	0.496546
148	0.199365	0.207442	0.2043	0.159531	0.0370501	0.139632	0.14543	0.236414	0.250532	0.170038	0.0250598	0.17912	0.201886	0.0629244	0.10582	0.121603	0.17113	0.0365085	0.0909376	0.0368455	0.2154		0.169914	0.110597	0.0742582	0.173213	0.073112	0.0475559	0.13041	0.166102	0.146333	0.173034	0.123746	0.0819466	0.0203598	0.163344	0.0595374	0.12112		0.203599	0.199147	0.20218	0.435262	0.168552	0.14543	0.236414	0.250532	0.221431	0.472535
149	0.190743	0.186335	0.176442	0.154505	0.0247648	0.171279	0.165808	0.243554	0.292116	0.142995	0.0212658	0.150841	0.187148	0.0681012	0.11774	0.0828987	0.212225	0.0261614	0.131875	0.0306986	0.215604		0.152255	0.0928084	0.0740973	0.136261	0.0885881	0.0715488	0.153254	0.144356	0.127833	0.181867	0.114504	0.0993699	0.0564104	0.146131	0.0683911	0.116976		0.188052	0.189218	0.203328	0.433858	0.168499	0.165808	0.243554	0.292116	0.192012	0.474933
150	0.192008	0.179696	0.199942	0.147404	0.0511392	0.159675	0.142523	0.241129	0.270433	0.174852	0.049465	0.175753	0.17592	0.0701969	0.109006	0.088148	0.200942	0.0687049	0.106158	0.0643506	0.184758		0.172233	0.0914153	0.0344149	0.117044	0.123794	0.0576338	0.112699	0.101116	0.161839	0.17155	0.122428	0.117383	0.0118578	0.10692	0.0498166	0.137907		0.208935	0.197463	0.200971	0.435738	0.168747	0.142523	0.241129	0.270433	0.218846	0.471951
151	0.21413	0.182793	0.175914	0.134267	0.0153772	0.174879	0.158581	0.234309	0.255153	0.160644	0.0322812	0.16811	0.164135	0.0457629	0.120706	0.0381241	0.196281	0.0391589	0.100397	0.033286	0.216464		0.152337	0.110504	0.0786086	0.142387	0.0997272	0.106178	0.0932196	0.144686	0.164037	0.153808	0.151021	0.0896797	0.0431225	0.158823	0.0601605	0.122789		0.210663	0.197383	0.210663	0.432032	0.165531	0.158581	0.234309	0.255153	0.189449	0.446932
152	0.222509	0.1991	0.178484	0.138648	0.0407594	0.213838	0.152658	0.23616	0.239744	0.167966	0.0335096	0.160352	0.166798	0.0489173	0.119907	0.102646	0.161991	0.0392584	0.0935705	0.0365102	0.192743		0.139738	0.0866432	0.0382756	0.149252	0.0861968	0.106234	0.0944077	0.128189	0.138841	0.161087	0.135367	0.0769728	0.0131733	0.115229	0.0422355	0.0984726		0.199959	0.196589	0.197785	0.450569	0.184516	0.152658	0.23616	0.239744	0.194639	0.486774
153	0.210013	0.163762	0.188836	0.148123	0.0279185	0.201586	0.153614	0.226648	0.266222	0.144556	0.0495749	0.148828	0.183195	0.0559739	0.120067	0.0578698	0.204268	0.0578602	0.0999172	0.0373147	0.205311		0.166053	0.0689347	0.0595644	0.137843	0.0663132	0.0707451	0.107732	0.161132	0.131315	0.167245	0.172172	0.056967	0.0545087	0.134563	0.0648565	0.124288		0.207099	0.206356	0.198883	0.450472	0.163358	0.153614	0.226648	0.266222	0.222698	0.520182
154	0.210353	0.15972	0.185315	0.1504	0.0266731	0.186604	0.173183	0.216617	0.259067	0.138752	0.0377788	0.173933	0.169758	0.0409462	0.123085	0.0677908	0.176887	0.0471734	0.111395	0.0316807	0.206082		0.186631	0.113707	0.046354	0.12129	0.0609287	0.109008	0.122395	0.146155	0.173283	0.143228	0.133073	0.053009	0.0432231	0.148474	0.0880816	0.120661		0.19587	0.214182	0.205279	0.413023	0.164063	0.173183	0.216617	0.259067	0.215408	0.500021
155	0.226296	0.180494	0.164126	0.167415	0.012803	0.18416	0.17115	0.241053	0.30053	0.146506	0.0486663	0.173984	0.184035	0.0261782	0.119825	0.0377546	0.190687	0.0420145	0.0975112	0.00758075	0.174495		0.190434	0.0964912	0.0862729	0.100051	0.0398398	0.0893897	0.103532	0.122617	0.117008	0.140418	0.159094	0.102792	0.0612965	0.104139	0.0823085	0.123549		0.211945	0.194733	0.206294	0.428838	0.175665	0.17115	0.241053	0.30053	0.182289	0.511071
156	0.215968	0.186632	0.174436	0.156902	0.0378863	0.165766	0.16795	0.249795	0.27172	0.149671	0.0378918	0.154331	0.171702	0.025507	0.104911	0.0622831	0.193308	0.0431338	0.122422	0.00626942	0.168315		0.166746	0.0935531	0.0870537	0.149234	0.0563942	0.0935613	0.116491	0.0921456	0.130675	0.142502	0.16001	0.0775693	0.0606591	0.185439	0.118252	0.120327		0.217276	0.186105	0.197328	0.431552	0.152077	0.16795	0.249795	0.27172	0.172922	0.540098
157	0.217078	0.15417	0.200998	0.15617	0.049448	0.170016	0.163035	0.272792	0.308082	0.151102	0.0324039	0.171974	0.167766	0.0469506	0.108219	0.0393901	0.17467	0.0483409	0.137496	0.0217728	0.13766		0.176344	0.103953	0.0538843	0.144655	0.0471356	0.0921399	0.134789	0.0985271	0.122734	0.149078	0.154494	0.0807624	0.0556226	0.186228	0.0999896	0.116915		0.199357	0.18623	0.192841	0.447044	0.135404	0.163035	0.272792	0.308082	0.215446	0.535907
158	0.201191	0.14255	0.187432	0.142649	0.024632	0.166476	0.173518	0.279962	0.284645	0.156646	0.044107	0.169711	0.17058	0.0253352	0.105113	0.0260049	0.148597	0.0457297	0.12388	0.0129709	0.1882		0.176161	0.114969	0.112701	0.152567	0.0722995	0.114916	0.0980331	0.132474	0.115942	0.140156	0.154316	0.099066	0.0328419	0.17249	0.0880166	0.126524		0.197524	0.19666	0.205756	0.439374	0.146601	0.173518	0.279962	0.284645	0.213652	0.500017
159	0.191666	0.170786	0.184247	0.146582	0.0451434	0.154114	0.198872	0.254802	0.297756	0.146332	0.00537285	0.189696	0.172401	0.0586924	0.10062	0.101239	0.185881	0.0221215	0.119021	0.03633	0.191313		0.172602	0.136043	0.0830454	0.140286	0.0568521	0.0744819	0.105116	0.136477	0.133469	0.124211	0.188771	0.0921365	0.0273397	0.190536	0.11774	0.0924993		0.189274	0.193938	0.193523	0.430159	0.177098	0.198872	0.254802	0.297756	0.225892	0.4847
160	0.188119	0.175307	0.152613	0.131294	0.0366584	0.179225	0.153148	0.254614	0.289734	0.15952	0.0079675	0.156451	0.137823	0.0387802	0.116437	0.0660479	0.164739	0.0175605	0.148113	0.0316122	0.166539		0.156997	0.111614	0.0774086	0.15087	0.0678304	0.0854845	0.102296	0.144667	0.135756	0.139707	0.169531	0.0533527	0.0111995	0.145982	0.0920474	0.105659		0.195878	0.19195	0.193032	0.415047	0.156891	0.153148	0.254614	0.289734	0.228087	0.455068
161	0.182285	0.156745	0.144517	0.153297	0.0600336	0.158178	0.177112	0.253111	0.280929	0.16467	0.0266564	0.153289	0.176137	0.0389058	0.105616	0.0396194	0.172715	0.0328075	0.129577	0.0200526	0.136539		0.20267	0.0995416	0.0625223	0.160076	0.0484269	0.0634248	0.127437	0.135763	0.139862	0.140151	0.160745	0.106498	0.0307134	0.194483	0.112705	0.147618		0.212087	0.181959	0.185995	0.421327	0.176727	0.177112	0.253111	0.280929	0.234094	0.50197
162	0.174378	0.146359	0.14901	0.164862	0.0180389	0.188841	0.166583	0.247516	0.307325	0.168656	0.0262869	0.146842	0.155701	0.0458208	0.0907597	0.0632632	0.166017	0.0405164	0.114847	0.0305098	0.120062		0.17407	0.139909	0.0202396	0.17064	0.03377	0.032605	0.0796968	0.126507	0.122137	0.123911	0.187581	0.121643	0.0997413	0.272522	0.0916919	0.110887		0.20558	0.190012	0.195183	0.436775	0.181483	0.166583	0.247516	0.307325	0.240712	0.466239
163	0.204695	0.15555	0.170739	0.163669	0.00141247	0.178544	0.186825	0.253835	0.259765	0.16324	0.0178827	0.180745	0.152717	0.0497144	0.0889608	0.0937535	0.208556	0.0290391	0.120263	0.0216519	0.151985		0.184284	0.118886	-0.0144554	0.137721	0.0628857	0.0786429	0.113054	0.152531	0.132306	0.143734	0.175414	0.103671	0.0439525	0.233359	0.100695	0.11145		0.188907	0.1869	0.194321	0.433281	0.147677	0.186825	0.253835	0.259765	0.243418	0.508833
164	0.205251	0.152518	0.155184	0.162281	0.0223286	0.195746	0.151648	0.273377	0.269108	0.18372	0.0342517	0.141131	0.14801	0.0412849	0.0733802	0.076088	0.184765	0.018511	0.137103	-0.00559344	0.0706161		0.179162	0.0644009	0.0292233	0.136619	0.0737845	0.0431047	0.112123	0.17136	0.148759	0.121671	0.187591	0.0930961	0.0897328	0.262643	0.0775196	0.120204		0.193058	0.181116	0.183156	0.444989	0.142027	0.151648	0.273377	0.269108	0.232912	0.499362
165	0.212257	0.151506	0.1595	0.171128	0.0298498	0.185596	0.160592	0.268481	0.252309	0.184505	0.0313226	0.138884	0.162116	0.0446185	0.087214	0.0903145	0.221787	0.0319939	0.124041	0.0206527	0.0976426		0.151158	0.0986523	0.0230956	0.102742	0.0628955	0.090546	0.0880585	0.164646	0.13614	0.114392	0.129841	0.0864768	0.0347901	0.243251	0.101805	0.103736		0.197869	0.171498	0.200213	0.418775	0.152036	0.160592	0.268481	0.252309	0.221895	0.497599
166	0.199469	0.152772	0.156184	0.165303	0.0276884	0.16114	0.155292	0.255069	0.272887	0.175457	0.0148687	0.159641	0.130652	0.0515258	0.0878099	0.096586	0.178436	0.0203041	0.118256	0.0202884	0.10402		0.149325	0.103972	0.00145872	0.127222	0.0568772	0.0543928	0.0879106	0.168434	0.107121	0.121857	0.153176	0.112762	0.0754754	0.22602	0.106987	0.0744694		0.200284	0.184042	0.209586	0.414136	0.154187	0.155292	0.255069	0.272887	0.237041	0.499588
167	0.200493	0.152458	0.128848	0.168331	0.0111652	0.179692	0.168263	0.272633	0.258293	0.168138	0.0135513	0.146492	0.163086	0.0430255	0.0946404	0.0448293	0.160631	0.0383583	0.131699	0.0369438	0.10338		0.170674	0.0942753	0.06909	0.113209	0.0776726	0.0191822	0.129719	0.118137	0.158127	0.133174	0.16908	0.107482	0.0811252	0.238711	0.115348	0.0958324		0.211283	0.179802	0.211118	0.424288	0.150852	0.168263	0.272633	0.258293	0.258905	0.509795
168	0.196318	0.158468	0.144666	0.154141	0.0225722	0.179402	0.129061	0.25742	0.244155	0.216434	0.0466373	0.157123	0.148333	0.0290904	0.115539	0.0811694	0.17138	0.0398573	0.126967	0.0502946	0.0887174		0.183381	0.0959667	0.0517397	0.135048	0.0685927	0.0397315	0.1222	0.171307	0.110009	0.12339	0.104479	0.121513	0.0835296	0.245484	0.121934	0.0986692		0.186317	0.18558	0.212892	0.434971	0.15822	0.129061	0.25742	0.244155	0.230089	0.525479
169	0.208933	0.160504	0.138834	0.137848	0.00855784	0.144805	0.160473	0.249815	0.260003	0.207492	0.019993	0.144838	0.134487	0.0634583	0.113225	0.0756623	0.175428	0.0165543	0.113864	0.0425745	0.114124		0.1539	0.110778	0.0580574	0.141569	0.0501915	0.0883827	0.123846	0.103484	0.121568	0.137235	0.152731	0.130478	0.0263768	0.228096	0.0976426	0.0925324		0.19785	0.182605	0.204026	0.432371	0.139203	0.160473	0.249815	0.260003	0.208733	0.557345
170	0.212101	0.16452	0.140291	0.14675	0.0202908	0.15441	0.162958	0.244095	0.252769	0.188296	0.0318215	0.140645	0.130049	0.0502125	0.120502	0.0498008	0.194135	0.0378012	0.136507	0.0460279	0.127064		0.138033	0.0917963	0.0326828	0.102738	0.0824674	0.0517489	0.0851369	0.147642	0.123906	0.136854	0.147985	0.0883576	0.0853131	0.261253	0.0946432	0.13808		0.200097	0.184363	0.190241	0.436527	0.156349	0.162958	0.244095	0.252769	0.222692	0.545168
171	0.208299	0.157461	0.132237	0.152563	0.0339568	0.197919	0.16763	0.223399	0.260755	0.16815	0.0464022	0.135619	0.152713	0.0345793	0.109516	0.0208778	0.175889	0.0439674	0.134344	0.0472016	0.104006		0.188259	0.0912837	-0.031026	0.132471	0.0818784	0.03764	0.135179	0.0881263	0.109727	0.144134	0.134436	0.108401	0.0882624	0.257362	0.0654029	0.0855536		0.230218	0.186255	0.205807	0.435118	0.12859	0.16763	0.223399	0.260755	0.221041	0.579391
172	0.217096	0.165989	0.1157	0.158774	0.0186243	0.165585	0.180035	0.231478	0.255396	0.168566	0.027828	0.135354	0.136164	0.0282321	0.131969	0.0134291	0.204217	0.0383415	0.149923	0.0387605	0.0917498		0.148211	0.0962418	0.0113308	0.105727	0.0746666	0.0301759	0.0872476	0.121309	0.0980659	0.125468	0.188782	0.119894	0.0218917	0.233037	0.073592	0.127214		0.218913	0.201836	0.174808	0.435282	0.170375	0.180035	0.231478	0.255396	0.21699	0.555005
173	0.197524	0.154548	0.122541	0.135503	0.0416183	0.144876	0.187804	0.240338	0.238695	0.194916	0.0486431	0.127192	0.120557	0.0567224	0.141798	0.0549968	0.180317	0.0607071	0.119566	0.0418857	0.105148		0.163461	0.115382	-0.000518071	0.140453	0.0979052	0.0761923	0.1187	0.152652	0.129245	0.127327	0.0972738	0.0877787	0.0384457	0.175145	0.0733088	0.0738341		0.222688	0.197125	0.186191	0.413617	0.163375	0.187804	0.240338	0.238695	0.218039	0.567168
174	0.187643	0.15253	0.130033	0.149361	0.0305274	0.137912	0.187364	0.218757	0.240281	0.186211	0.0468266	0.111615	0.14369	0.0392639	0.123824	0.0918146	0.172002	0.0541889	0.164732	0.034711	0.123039		0.157297	0.0909754	-0.0473245	0.101766	0.0937805	0.0524622	0.117257	0.13982	0.144963	0.126306	0.142507	0.112904	-0.00172514	0.272836	0.071645	0.109209		0.227592	0.201728	0.206897	0.438942	0.144574	0.187364	0.218757	0.240281	0.269483	0.564612
175	0.210728	0.131653	0.109789	0.126554	0.0130208	0.139759	0.165868	0.208946	0.240918	0.183338	0.0272795	0.143904	0.119491	0.068216	0.136909	0.0583022	0.208628	0.0344771	0.138939	0.0441584	0.150194		0.181518	0.0961499	0.024066	0.116347	0.0805618	0.0335228	0.128064	0.137018	0.114647	0.120106	0.132262	0.0850916	0.0984745	0.230206	0.099311	0.065879		0.220265	0.20122	0.182654	0.438241	0.155664	0.165868	0.208946	0.240918	0.253597	0.524998
176	0.222395	0.144613	0.128951	0.134101	0.0312758	0.148753	0.190003	0.191044	0.243115	0.183775	0.0452732	0.13276	0.139835	0.0388946	0.147404	0.056812	0.156238	0.0321978	0.115894	0.0480718	0.106326		0.1437	0.117327	0.0133153	0.134473	0.101624	0.0638746	0.0899219	0.101722	0.0958208	0.146987	0.154302	0.0840575	0.0325133	0.260638	0.0890263	0.0676629		0.229113	0.191422	0.202113	0.445255	0.159966	0.190003	0.191044	0.243115	0.24791	0.560327
177	0.216168	0.157205	0.123563	0.115788	0.0569348	0.127802	0.17934	0.186695	0.265627	0.18104	0.0509447	0.142527	0.138116	0.0414842	0.131135	0.0615851	0.186171	0.0415951	0.151334	0.0869689	0.0843707		0.161779	0.10139	-0.0156501	0.159976	0.0751309	0.065995	0.0932376	0.107439	0.130334	0.132455	0.130874	0.0736698	-0.0425598	0.273021	0.110363	0.112469		0.249327	0.178899	0.194775	0.421744	0.145882	0.17934	0.186695	0.265627	0.246065	0.556579
178	0.21436	0.161303	0.125314	0.11763	0.0352104	0.125543	0.184405	0.198753	0.278403	0.183978	0.053512	0.174828	0.132824	0.0459055	0.142795	0.0650896	0.170377	0.0340272	0.12214	0.0622566	0.106953		0.162435	0.113874	-0.0190184	0.146844	0.0965078	0.0561059	0.0840104	0.100143	0.108661	0.152141	0.135112	0.0830502	0.0407935	0.24238	0.107865	0.0521406		0.225673	0.185614	0.180672	0.399685	0.164808	0.184405	0.198753	0.278403	0.255032	0.553607
179	0.194435	0.163651	0.119659	0.134503	0.0441573	0.133579	0.176084	0.18784	0.255257	0.149206	0.0261359	0.172734	0.136089	0.0423971	0.125539	0.0816788	0.18733	0.0410233	0.137585	0.0684923	0.100381		0.176772	0.0865599	-0.00842945	0.109197	0.0833174	0.0711414	0.116029	0.0631298	0.110124	0.127477	0.119697	0.103179	0.0429274	0.237598	0.100661	0.0429508		0.233695	0.189397	0.201048	0.397673	0.151185	0.176084	0.18784	0.255257	0.255028	0.557228
180	0.216792	0.154935	0.12008	0.143438	0.0720109	0.129454	0.16657	0.212267	0.24548	0.197974	0.0238307	0.211748	0.166164	0.0442928	0.114742	0.0435643	0.177053	0.0318634	0.133215	0.0340422	0.0894428		0.172867	0.0733669	-0.0364312	0.129745	0.0939491	0.0459237	0.124912	0.074667	0.12292	0.13793	0.101439	0.111843	0.0556441	0.237278	0.130213	0.0835621		0.23505	0.176235	0.204363	0.416801	0.141568	0.16657	0.212267	0.24548	0.213008	0.544128
181	0.208883	0.148629	0.125255	0.134202	0.0543238	0.138414	0.156551	0.216273	0.266957	0.157217	0.0557364	0.219568	0.150369	0.021695	0.115502	0.0183652	0.165951	0.0532728	0.126632	0.0600435	0.11161		0.103573	0.113687	-0.0186568	0.144089	0.0861546	0.0630854	0.120031	0.0891766	0.0927729	0.135028	0.161101	0.122119	0.0875157	0.197894	0.0691579	0.0820425		0.249535	0.183232	0.182739	0.425587	0.140285	0.156551	0.216273	0.266957	0.224233	0.507739
182	0.22259	0.138615	0.130509	0.133759	0.0402786	0.116911	0.159865	0.183317	0.287715	0.135828	0.020052	0.191577	0.150997	0.00871394	0.108613	0.0735121	0.197805	0.0278457	0.131238	0.0372722	0.0727649		0.132018	0.0974785	0.0102271	0.142452	0.112003	0.0888076	0.111963	0.0976776	0.107878	0.129748	0.134096	0.0794488	0.0817125	0.258834	0.110131	0.0846145		0.241231	0.193325	0.210095	0.441484	0.1397	0.159865	0.183317	0.287715	0.243924	0.544508
183	0.20764	0.145856	0.121361	0.145934	0.0799613	0.109711	0.150587	0.19891	0.25281	0.145844	0.0681837	0.218726	0.158204	0.0154575	0.115247	0.0509103	0.166138	0.0581324	0.139115	0.0225822	0.0889158		0.118791	0.0946886	-0.0189935	0.110634	0.103241	0.0878149	0.0871671	0.10273	0.103768	0.135967	0.102835	0.094038	0.101117	0.195054	0.121005	0.0520614		0.245362	0.176547	0.197617	0.420221	0.134205	0.150587	0.19891	0.25281	0.248362	0.511038
184	0.21825	0.153242	0.150013	0.157819	0.0600922	0.109951	0.153256	0.185196	0.266752	0.162754	0.0220348	0.21016	0.123947	0.0059061	0.137987	0.0326755	0.162445	0.0101697	0.123116	0.0141322	0.115318		0.121754	0.0857605	-0.00101559	0.18303	0.0951656	0.0832427	0.0974959	0.12286	0.0670057	0.140128	0.158796	0.0628127	0.0669045	0.226046	0.125991	0.0879655		0.254239	0.171775	0.189741	0.42785	0.125521	0.153256	0.185196	0.266752	0.242694	0.493254
185	0.230101	0.143965	0.158601	0.150369	0.0319745	0.0919331	0.138507	0.198991	0.279091	0.152435	-0.000696377	0.186273	0.136898	0.0136768	0.139974	0.0118179	0.162888	0.0145686	0.121394	0.031382	0.0940187		0.108212	0.119887	0.0479153	0.11618	0.115373	0.088337	0.0957875	0.0496388	0.0991499	0.133837	0.141095	0.101964	0.0206625	0.203783	0.135778	0.067991		0.241874	0.170894	0.187823	0.435909	0.142105	0.138507	0.198991	0.279091	0.271311	0.499241
186	0.222264	0.124183	0.180741	0.162715	0.0188398	0.0925223	0.177915	0.21355	0.259096	0.147013	0.0212184	0.195191	0.122742	0.0053505	0.136295	0.0182075	0.160833	0.0341734	0.124885	0.0337501	0.0800034		0.131187	0.0798935	0.0131902	0.1228	0.126343	0.103339	0.147232	0.0735214	0.106686	0.121742	0.105619	0.0869737	0.0805382	0.257649	0.117931	0.0330635		0.219161	0.164525	0.195033	0.426285	0.134271	0.177915	0.21355	0.259096	0.222552	0.505172
187	0.213093	0.132488	0.154302	0.171555	0.0531994	0.0979368	0.150289	0.193311	0.237864	0.165449	0.0465119	0.179955	0.160541	-0.0167221	0.10815	0.00594722	0.172042	0.0512182	0.134256	0.0486772	0.0879931		0.101883	0.108123	0.0420348	0.130655	0.0715089	0.08197	0.160754	0.0443787	0.111548	0.113467	0.154725	0.088103	0.0756034	0.155733	0.11715	0.0301788		0.24085	0.164689	0.187936	0.422159	0.139778	0.150289	0.193311	0.237864	0.268416	0.527281
188	0.187455	0.100797	0.158357	0.171246	0.0507438	0.12073	0.15249	0.213296	0.272164	0.144459	0.025611	0.199547	0.140625	-0.0354707	0.118673	0.0531554	0.161676	0.0214409	0.12773	0.0363605	0.13086		0.132957	0.0822427	0.0362976	0.140606	0.0937778	0.0776346	0.116783	0.0880954	0.102845	0.116661	0.0957026	0.0843643	0.0263198	0.220651	0.0896382	0.0579174		0.235932	0.167249	0.201802	0.417292	0.139902	0.15249	0.213296	0.272164	0.223875	0.529297
189	0.183422	0.108773	0.156976	0.169361	0.0564392	0.113099	0.14025	0.246557	0.283534	0.164627	0.0304675	0.196963	0.147387	-0.0261923	0.122047	0.0200599	0.154742	0.0376943	0.13368	0.0638972	0.125714		0.125622	0.109991	0.0779537	0.150405	0.0563672	0.0839874	0.116904	0.0621767	0.0991465	0.107439	0.136694	0.129766	0.0702414	0.182779	0.135722	0.0650229		0.22765	0.18104	0.202548	0.411363	0.135181	0.14025	0.246557	0.283534	0.225752	0.52182
190	0.172422	0.11316	0.134436	0.158857	0.045231	0.114745	0.136974	0.211498	0.258231	0.169692	0.0143548	0.207325	0.148441	-0.00149351	0.113557	0.0793322	0.153424	0.0304891	0.123814	0.035541	0.119988		0.125404	0.0930095	0.0686409	0.143134	0.105536	0.0778444	0.115615	0.0106294	0.0901165	0.105317	0.131958	0.130049	0.0557499	0.193685	0.136747	0.0545223		0.220391	0.172284	0.189193	0.43407	0.150734	0.136974	0.211498	0.258231	0.226602	0.533373
191	0.187738	0.131793	0.111235	0.175862	0.048024	0.119391	0.143908	0.18882	0.27181	0.136532	0.0065369	0.192548	0.14219	-0.000239527	0.0857056	0.0633957	0.174709	0.015116	0.132206	0.0403619	0.131077		0.157688	0.112204	0.104745	0.130292	0.0605025	0.0859195	0.0913372	0.108623	0.103017	0.11061	0.0921112	0.115396	0.0968552	0.16215	0.117961	0.0223178		0.203784	0.184251	0.200422	0.435615	0.155538	0.143908	0.18882	0.27181	0.258829	0.532682
192	0.177302	0.130612	0.116848	0.18938	0.0272044	0.094691	0.127509	0.187358	0.290263	0.14992	0.0370103	0.229645	0.144517	0.0017352	0.0967324	0.0112991	0.16296	0.0290781	0.112168	0.0288439	0.146883		0.136281	0.0543981	0.104769	0.123938	0.103623	0.105613	0.111925	0.0743457	0.108585	0.111826	0.167382	0.110338	0.121655	0.187411	0.118943	0.0164766		0.222518	0.178552	0.194726	0.425144	0.150802	0.127509	0.187358	0.290263	0.237895	0.543111
193	0.199734	0.0980874	0.138957	0.177031	0.0380655	0.127359	0.118291	0.187192	0.242256	0.132752	0.0136777	0.225088	0.139935	-0.0152927	0.106531	-0.00788124	0.151992	0.0277909	0.129607	0.0356686	0.114961		0.094618	0.082164	0.0708368	0.151388	0.0577369	0.0979948	0.118611	0.09801	0.0931501	0.108993	0.127978	0.137635	0.133404	0.20748	0.0994288	0.031608		0.216549	0.17782	0.183694	0.413419	0.12527	0.118291	0.187192	0.242256	0.237863	0.510559
194	0.183426	0.106282	0.14007	0.19551	0.0244857	0.075154	0.105127	0.190625	0.266922	0.149716	0.0151969	0.196057	0.136179	-0.00218323	0.10784	0.00929474	0.17173	0.0297237	0.115061	0.015897	0.128907		0.120576	0.0763137	0.0696053	0.119406	0.120922	0.102003	0.10177	0.0922827	0.121022	0.102607	0.174918	0.119168	0.118197	0.209795	0.105656	0.0183414		0.196145	0.1776	0.193131	0.413527	0.144193	0.105127	0.190625	0.266922	0.234791	0.516207
195	0.209178	0.110643	0.148212	0.163407	0.0202565	0.0665445	0.122644	0.18052	0.222915	0.15502	0.0288024	0.204992	0.131681	-0.00942364	0.110833	0.00123908	0.161495	0.0371725	0.0990692	0.00554118	0.134232		0.128568	0.0506566	0.0722382	0.136532	0.09011	0.0685301	0.111067	0.0617213	0.0817874	0.10626	0.132034	0.1165	0.097946	0.17706	0.0738961	0.00822433		0.196577	0.181972	0.179235	0.391756	0.15238	0.122644	0.18052	0.222915	0.233904	0.508353
196	0.231239	0.125472	0.144925	0.168817	0.0434062	0.0743318	0.141131	0.1756	0.247949	0.129171	0.0445549	0.196882	0.141593	0.00642024	0.104445	-0.0112346	0.150059	0.0328092	0.130685	-0.00171168	0.128764		0.104864	0.0564219	0.051348	0.139333	0.0739218	0.0963578	0.115004	0.107272	0.0716203	0.114843	0.15668	0.136094	0.054572	0.14432	0.0429696	0.0684013		0.218875	0.189472	0.200647	0.390055	0.133512	0.141131	0.1756	0.247949	0.221713	0.492605
197	0.217714	0.130835	0.148242	0.168414	0.0613796	0.0622714	0.130665	0.181581	0.268437	0.156416	0.0111983	0.231451	0.130962	0.0120468	0.0848824	-0.00529985	0.152991	0.0167471	0.133619	0.0374368	0.131522		0.133446	0.0355229	0.0865279	0.158719	0.0870819	0.0487807	0.135127	0.126267	0.0907046	0.110163	0.131357	0.119479	0.0780578	0.169006	0.0969848	0.032068		0.226338	0.195505	0.200119	0.402004	0.151561	0.130665	0.181581	0.268437	0.257167	0.54217
198	0.222046	0.128625	0.164909	0.15186	0.0517642	0.0632547	0.128131	0.181638	0.221831	0.164004	0.0428432	0.217037	0.149076	0.0104728	0.0846485	0.00409316	0.164192	0.0386987	0.135175	0.0308801	0.142638		0.107543	0.0452311	0.0941615	0.158158	0.0674814	0.0774136	0.107076	0.114971	0.0758459	0.124072	0.141294	0.165872	0.0446082	0.155992	0.0831157	0.0207291		0.206038	0.179625	0.205604	0.415293	0.141031	0.128131	0.181638	0.221831	0.238641	0.515705
199	0.211474	0.114111	0.153142	0.163918	0.0625295	0.0888862	0.118804	0.165612	0.2698	0.113947	0.0207855	0.207848	0.112087	-0.021768	0.0832094	-0.0138689	0.166027	0.0280967	0.0853089	0.0253096	0.13999		0.107826	0.0993574	0.0943723	0.12844	0.0920773	0.0582597	0.10388	0.0715532	0.0736415	0.115527	0.151261	0.133976	0.022909	0.149939	0.0834253	0.055366		0.220432	0.185311	0.181512	0.407158	0.146957	0.118804	0.165612	0.2698	0.227094	0.527237
200	0.195892	0.113035	0.143135	0.163361	0.0357426	0.0871438	0.0770115	0.157317	0.276581	0.12839	-0.00216497	0.183359	0.143131	-0.0133286	0.082432	0.00408368	0.191756	0.00641136	0.0990548	0.0182341	0.13596		0.111114	0.048375	0.0752399	0.143702	0.105871	0.0680896	0.109428	0.047134	0.102268	0.106228	0.127784	0.125882	0.00424933	0.129687	0.105221	0.0856224		0.215749	0.179813	0.192938	0.391682	0.147841	0.0770115	0.157317	0.276581	0.219652	0.500159
201	0.213703	0.113034	0.12742	0.157865	0.0723722	0.105826	0.0905197	0.158155	0.271658	0.145632	0.0469244	0.151181	0.108857	0.0177466	0.091661	0.00563927	0.1884	0.0303264	0.111335	0.0100302	0.107804		0.106883	0.0726017	0.0737195	0.211693	0.0685369	0.0793504	0.0909991	0.117298	0.083857	0.102031	0.123676	0.0958398	-0.0181793	0.132791	0.0524235	0.0831647		0.218452	0.191219	0.188192	0.400794	0.143264	0.0905197	0.158155	0.271658	0.263338	0.49253
202	0.207457	0.115789	0.154361	0.166224	0.0731339	0.0877709	0.0941078	0.179845	0.255875	0.154623	0.0379557	0.172353	0.120321	0.0054488	0.102454	-0.00522496	0.181712	0.0339452	0.146039	0.0174612	0.145104		0.1214	0.0413576	0.0766442	0.140105	0.072743	0.0884453	0.0346428	0.0989781	0.0756055	0.101422	0.129659	0.098236	0.00154074	0.177243	0.0435472	0.049909		0.226277	0.19281	0.187372	0.387153	0.14915	0.0941078	0.179845	0.255875	0.24566	0.534612
203	0.194475	0.122305	0.15613	0.160283	0.0284926	0.0958125	0.12727	0.162933	0.282998	0.124739	0.0309533	0.172849	0.146491	0.0176901	0.105913	0.000368426	0.164057	0.0309964	0.106153	0.01414	0.114722		0.135996	0.0648827	0.0986487	0.151258	0.0753324	0.0375666	0.0686826	0.15046	0.0816845	0.108756	0.150327	0.112415	0.0683139	0.214251	0.0436571	0.042537		0.223176	0.179141	0.206456	0.375617	0.137658	0.12727	0.162933	0.282998	0.262539	0.506934
204	0.206103	0.134254	0.14709	0.173311	0.0303198	0.0987083	0.118172	0.157658	0.239574	0.142888	0.0374891	0.141301	0.114179	0.0279651	0.0972102	0.0208928	0.144222	0.02933	0.141215	-0.00545877	0.135991		0.146462	0.067384	0.107486	0.14475	0.0419593	0.0628533	0.0837925	0.10132	0.0736678	0.0993556	0.150475	0.130435	0.062499	0.174016	0.0189395	0.0538116		0.228726	0.193796	0.182883	0.365342	0.138663	0.118172	0.157658	0.239574	0.242951	0.502507
205	0.203565	0.128579	0.158767	0.162015	0.00157023	0.0852171	0.125428	0.169521	0.2275	0.165246	0.0330478	0.133575	0.113618	-0.00164596	0.0974181	-0.0231699	0.147493	0.0286278	0.14825	0.0324221	0.131091		0.12059	0.0711752	0.118159	0.141187	0.0298317	0.0620174	0.0648743	0.0646755	0.0804064	0.100819	0.139883	0.141534	0.0361651	0.247554	0.0155184	0.0754057		0.23235	0.189109	0.200965	0.372065	0.14133	0.125428	0.169521	0.2275	0.284849	0.515365
206	0.178809	0.126894	0.170623	0.166456	0.0102594	0.0681039	0.151703	0.176843	0.217032	0.16101	0.0292236	0.124361	0.125297	0.0148066	0.106723	0.0249336	0.154046	0.0352893	0.121519	-0.00388335	0.131162		0.14207	0.0635305	0.145952	0.168337	0.0534741	0.0599294	0.107653	0.086363	0.0709048	0.125697	0.114668	0.136598	0.0195973	0.234196	0.0299807	0.0479114		0.241181	0.189165	0.187974	0.378464	0.109592	0.151703	0.176843	0.217032	0.246443	0.503389
207	0.162704	0.15087	0.150091	0.171493	-0.00317066	0.0952108	0.147101	0.15674	0.18121	0.151883	0.0282877	0.135377	0.114051	0.0218659	0.0944029	0.0202207	0.156348	0.0159062	0.105965	0.0374751	0.0901253		0.152506	0.0712312	0.113715	0.151005	0.0427789	0.0788782	0.105755	0.128703	0.0448178	0.118837	0.109268	0.128393	0.0365796	0.236205	0.00250522	0.0316481		0.245566	0.194087	0.201047	0.369288	0.137557	0.147101	0.15674	0.18121	0.252692	0.505827
208	0.187645	0.140943	0.155882	0.174227	-0.0162021	0.0883943	0.142155	0.131798	0.23659	0.165271	0.0407579	0.163762	0.0953898	-0.00197404	0.111914	0.0241058	0.173416	0.0455005	0.125865	0.035057	0.124072		0.142258	0.0921204	0.111308	0.153159	0.0406749	0.0702884	0.0448175	0.104033	0.0802112	0.105849	0.171517	0.116094	0.062976	0.228509	0.0251819	0.0268217		0.260925	0.187867	0.182542	0.35685	0.111327	0.142155	0.131798	0.23659	0.244928	0.518379
209	0.187562	0.15737	0.156897	0.174352	0.0173286	0.121197	0.154804	0.139188	0.240185	0.167317	0.0453835	0.141515	0.113975	0.0239629	0.103257	0.0157834	0.161033	0.0355936	0.119299	0.0204599	0.137289		0.122681	0.0850345	0.0985259	0.164739	0.0513093	0.0296971	0.0964835	0.0927203	0.0810084	0.0932369	0.125029	0.127977	0.0484094	0.131171	0.00870941	0.0157961		0.244688	0.209738	0.182721	0.355823	0.13205	0.154804	0.139188	0.240185	0.309925	0.500387
210	0.193765	0.152083	0.137931	0.173035	0.00204893	0.116182	0.170786	0.120389	0.266558	0.147634	0.0132181	0.134993	0.104529	0.00461122	0.109205	0.0262172	0.154712	0.0240304	0.122776	0.0136226	0.150999		0.116897	0.0874709	0.111739	0.133801	0.0270802	0.0366556	0.0687734	0.103959	0.0586419	0.077285	0.169027	0.0866426	0.0352801	0.165731	0.0303159	0.0398158		0.255373	0.203807	0.211361	0.358747	0.13019	0.170786	0.120389	0.266558	0.2909	0.502896
211	0.192495	0.178408	0.136246	0.150504	0.00344569	0.09079	0.164678	0.130063	0.215496	0.154991	0.00770618	0.156511	0.103722	0.024201	0.0965899	0.0349527	0.17534	0.00983258	0.129449	0.0238243	0.158982		0.150677	0.0987061	0.0783883	0.137429	0.0484713	0.051556	0.0815362	0.0952968	0.0848911	0.130275	0.142232	0.112578	0.0415473	0.161473	0.026035	0.025727		0.241818	0.199862	0.204513	0.371148	0.113777	0.164678	0.130063	0.215496	0.280042	0.486157
212	0.184638	0.157414	0.159035	0.170111	0.00165299	0.105247	0.14736	0.143997	0.217625	0.136531	0.00692602	0.162256	0.0778888	0.023425	0.121771	0.00739757	0.151244	0.0115064	0.126569	0.0351103	0.158967		0.114435	0.0907787	0.0990979	0.173521	0.0361732	0.0619198	0.0818504	0.0929826	0.0691113	0.122847	0.178414	0.0919042	-0.0159143	0.0947926	0.00859425	0.0132021		0.242269	0.209412	0.206613	0.362803	0.136043	0.14736	0.143997	0.217625	0.273859	0.50665
213	0.199247	0.162313	0.146717	0.153554	0.0166756	0.12736	0.121352	0.139338	0.220697	0.145862	0.00479335	0.189047	0.0870479	0.0112902	0.102075	0.00595011	0.153055	0.0209568	0.107232	0.0354549	0.127667		0.125663	0.0828327	0.0495216	0.137218	0.0494667	0.0519087	0.0613401	0.114148	0.0717995	0.112608	0.139256	0.106553	0.062456	0.130979	0.0202932	0.0205212		0.245854	0.193883	0.19977	0.352401	0.13682	0.121352	0.139338	0.220697	0.276787	0.487103
214	0.167136	0.155915	0.138262	0.14703	0.0087823	0.149497	0.122016	0.139352	0.224231	0.161048	0.00938726	0.130241	0.0995229	0.0128055	0.10915	-0.0180527	0.158021	0.0109482	0.123944	0.0242552	0.165732		0.161759	0.0729927	0.108531	0.158416	0.028809	0.0573118	0.0487696	0.117849	0.0767949	0.115617	0.197241	0.112288	-0.0103123	0.113994	0.00590617	0.0329853		0.239817	0.186281	0.214384	0.361776	0.142048	0.122016	0.139352	0.224231	0.288237	0.48005
215	0.182607	0.152448	0.145947	0.175834	0.0243554	0.0833124	0.13932	0.164758	0.202016	0.157282	0.00759172	0.161398	0.0994969	0.0314046	0.116821	-0.00292081	0.180702	0.00682766	0.107515	0.0360063	0.15318		0.143142	0.0788594	0.0687488	0.175317	0.0512562	0.051629	0.050618	0.119706	0.0764651	0.103394	0.166435	0.153363	-0.076898	0.168386	-0.00539486	0.0234843		0.240984	0.196112	0.207201	0.363423	0.12339	0.13932	0.164758	0.202016	0.253562	0.487778
216	0.17743	0.145427	0.122655	0.152944	0.0451327	0.0929233	0.140225	0.151026	0.227595	0.173618	0.00214778	0.140667	0.0855353	0.0510999	0.121587	-0.0623792	0.181356	0.0103007	0.0923544	0.0425639	0.175239		0.131681	0.0877938	0.112763	0.143811	0.036041	0.0505999	0.0794658	0.0987965	0.0745087	0.107522	0.143166	0.0950964	0.0508749	0.154457	0.00881734	0.0332952		0.22739	0.198093	0.2058	0.341351	0.120808	0.140225	0.151026	0.227595	0.269345	0.499194
217	0.204576	0.147863	0.114787	0.130862	0.0589635	0.0880331	0.127998	0.140428	0.222178	0.163537	0.00188168	0.155632	0.108283	0.00648474	0.110993	0.0261485	0.165731	0.0141585	0.0906886	0.0713926	0.188212		0.172528	0.0855399	0.124241	0.168491	0.0448495	0.0559909	0.0498681	0.137012	0.0616104	0.112119	0.163975	0.0926332	0.0463783	0.14648	-0.0344989	0.0145318		0.242221	0.210635	0.187253	0.343745	0.130982	0.127998	0.140428	0.222178	0.250254	0.498373
218	0.203589	0.151975	0.119428	0.11839	0.0574477	0.106322	0.125112	0.147726	0.224822	0.141519	-0.00488817	0.121749	0.0961692	0.0240411	0.129325	0.00110842	0.163534	-0.00849199	0.087515	0.0556283	0.184201		0.142555	0.0624516	0.164147	0.130363	0.039316	0.0729381	0.052903	0.118098	0.0694058	0.110369	0.160104	0.10212	0.010108	0.13222	0.022118	-0.000727458		0.233095	0.192415	0.196479	0.331646	0.145706	0.125112	0.147726	0.224822	0.235796	0.465288
219	0.206295	0.139712	0.125231	0.127749	0.0274082	0.0801177	0.116087	0.178455	0.213693	0.124369	0.0117865	0.134576	0.0833809	0.0454831	0.12209	-0.0175533	0.170754	0.0247498	0.0794801	0.0594281	0.156872		0.139662	0.0353606	0.12287	0.130783	0.0253643	0.0599175	0.0681853	0.150565	0.0744149	0.083311	0.162319	0.136633	0.0290545	0.128088	0.0360139	0.01092		0.248921	0.197867	0.183931	0.338002	0.123509	0.116087	0.178455	0.213693	0.231057	0.460407
220	0.209652	0.131216	0.112319	0.138105	0.0653357	0.0889288	0.116822	0.1411	0.234985	0.160818	0.0251088	0.131845	0.0927857	4.40067e-07	0.121132	0.00164672	0.161476	0.0327247	0.0917991	0.0771102	0.177504		0.148756	0.0522513	0.109015	0.153448	0.00832295	0.0774131	0.0569154	0.119149	0.0740071	0.105319	0.164599	0.129572	0.0183266	0.124613	-0.00654325	0.0140891		0.229136	0.190698	0.187638	0.322987	0.150913	0.116822	0.1411	0.234985	0.259353	0.461008
221	0.220801	0.128249	0.110362	0.116388	0.0314632	0.090288	0.130246	0.165543	0.226567	0.13294	0.0382621	0.135956	0.0991663	0.0082538	0.109111	-0.0121211	0.180671	0.0223823	0.0980867	0.0557328	0.125483		0.110826	0.0187427	0.143922	0.14172	0.0205791	0.045072	0.0320614	0.152105	0.0661329	0.0657748	0.106979	0.150904	0.0130623	0.139026	0.0334848	0.0306813		0.221161	0.208427	0.201295	0.31255	0.140934	0.130246	0.165543	0.226567	0.248653	0.443194
222	0.206296	0.136542	0.118214	0.123027	0.0390179	0.0892188	0.154617	0.17241	0.25181	0.148748	0.0359155	0.120522	0.102412	0.0201465	0.128748	-0.0257555	0.161111	0.0259987	0.0914555	0.0689794	0.140447		0.153651	0.0246393	0.116349	0.13617	0.0217857	0.0356958	0.0445557	0.125667	0.0622128	0.0623527	0.123332	0.104747	0.0446693	0.122647	0.0121875	0.00700055		0.221367	0.210041	0.182622	0.335231	0.150106	0.154617	0.17241	0.25181	0.228211	0.47954
223	0.200565	0.131689	0.123135	0.119338	0.0395934	0.0759178	0.147709	0.152409	0.229772	0.166637	0.0281711	0.104189	0.0818418	0.0218804	0.127897	-0.0382589	0.174493	0.017778	0.106799	0.0628192	0.12934		0.166145	0.0613987	0.136009	0.132129	0.0378294	0.052775	0.0376449	0.162522	0.0606417	0.0713681	0.103738	0.13392	0.0342979	0.107381	0.0200554	0.0637318		0.233364	0.205165	0.180384	0.351334	0.148905	0.147709	0.152409	0.229772	0.219637	0.475526
224	0.210648	0.140638	0.131754	0.116779	0.0439156	0.0910367	0.13344	0.179153	0.193233	0.127687	0.0154531	0.137461	0.073528	0.0260376	0.133856	-0.0133451	0.200703	0.0321753	0.083884	0.0898148	0.153033		0.126149	0.0567891	0.123593	0.136456	0.0124973	0.0656342	0.0797974	0.170213	0.107484	0.0785821	0.110827	0.0849148	0.00645316	0.147337	0.0154933	0.0503582		0.245527	0.201475	0.192711	0.351116	0.130875	0.13344	0.179153	0.193233	0.183922	0.457379
225	0.220807	0.158325	0.13747	0.120429	0.0357504	0.128651	0.154264	0.170722	0.191211	0.152848	0.0164598	0.129668	0.0817006	0.0094331	0.118358	0.013716	0.185701	0.0332646	0.124197	0.0905031	0.135364		0.14862	0.0584633	0.0854966	0.120523	0.0176028	0.0494267	0.0382211	0.137113	0.0732257	0.109982	0.0953916	0.169417	0.0287814	0.121682	-0.00637091	0.0617174		0.250978	0.20137	0.189447	0.358823	0.132711	0.154264	0.170722	0.191211	0.194562	0.476975
226	0.19515	0.138309	0.142525	0.115156	0.0552746	0.100495	0.156701	0.185557	0.193112	0.150937	0.0291768	0.127552	0.0943854	0.0141173	0.114368	-0.00041874	0.182045	0.0405903	0.074235	0.0871602	0.112284		0.153898	0.0684347	0.0674418	0.123401	0.00694831	0.0439049	0.022726	0.0836922	0.0850016	0.0984707	0.127443	0.0996801	0.0409648	0.0878743	-0.00451821	0.0231775		0.253261	0.193335	0.180395	0.379813	0.141768	0.156701	0.185557	0.193112	0.175353	0.480953
227	0.200409	0.138006	0.133695	0.116796	0.0120712	0.143092	0.160764	0.19532	0.208514	0.131339	0.00642177	0.151649	0.107563	0.0028026	0.109319	0.0154979	0.210294	0.0293438	0.106752	0.0983228	0.0964588		0.123307	0.077806	0.0787482	0.101691	0.00760455	0.054117	0.10643	0.130973	0.0795604	0.075915	0.170313	0.123488	0.0175374	0.113721	-0.00598656	0.0345253		0.256425	0.206013	0.177774	0.357656	0.153197	0.160764	0.19532	0.208514	0.189773	0.469735
228	0.206684	0.128255	0.131815	0.114889	0.0478776	0.124466	0.135014	0.187611	0.211669	0.155206	0.0194431	0.162715	0.116248	0.00179969	0.104278	-0.0338018	0.181844	0.0316438	0.102639	0.100232	0.124448		0.137171	0.0559063	0.0374536	0.104561	-0.00367825	0.071994	0.030912	0.114185	0.0976079	0.0764378	0.12833	0.109098	0.0204929	0.115611	0.00363166	0.0407116		0.235132	0.192181	0.190026	0.324621	0.114711	0.135014	0.187611	0.211669	0.185014	0.44606
229	0.210342	0.140947	0.153308	0.133808	0.0499945	0.124862	0.174424	0.207406	0.184272	0.156749	0.0024253	0.181584	0.114978	0.0185004	0.102375	0.0110523	0.190714	0.0285945	0.109779	0.106303	0.118579		0.104023	0.0505402	0.0432932	0.0951007	0.00619007	0.0459594	0.0130921	0.0654459	0.0745428	0.0558874	0.137576	0.135059	0.0378394	0.196685	0.0467781	0.0224101		0.251419	0.187457	0.218532	0.327242	0.128987	0.174424	0.207406	0.184272	0.20694	0.463058
230	0.219214	0.148687	0.166565	0.132599	0.0702067	0.108915	0.184653	0.193879	0.203435	0.14043	0.00791791	0.17205	0.117849	0.0185181	0.101779	-0.0358223	0.214635	0.0434859	0.101009	0.0618076	0.14288		0.100806	0.0564391	0.052424	0.0839341	0.0282212	0.0204792	0.0379021	0.0880961	0.0456141	0.0923982	0.116061	0.1009	0.104439	0.144746	0.0296696	0.0471763		0.249633	0.193691	0.186514	0.326128	0.109406	0.184653	0.193879	0.203435	0.198586	0.441261
231	0.216531	0.169566	0.155644	0.131141	0.0363361	0.148935	0.188662	0.205179	0.188628	0.156981	0.0361738	0.165193	0.122708	0.0130786	0.107557	0.0110923	0.209231	0.030076	0.0981407	0.0570668	0.0824421		0.149042	0.0731559	0.0406813	0.10016	0.0182592	-0.00747886	0.0768307	0.143405	0.0501803	0.0597824	0.150894	0.117128	0.092134	0.129875	0.0565511	0.0780948		0.229535	0.187572	0.201738	0.333846	0.114862	0.188662	0.205179	0.188628	0.183267	0.45576
232	0.206283	0.15282	0.165214	0.1414	0.0315753	0.110655	0.180987	0.225607	0.178757	0.143212	-0.00508137	0.166259	0.119768	0.00835132	0.105561	-0.0551522	0.201506	0.0143639	0.1138	0.0735427	0.132095		0.122256	0.0765113	0.0623097	0.0916336	-0.00361065	0.0241444	0.0446207	0.0884479	0.0622772	0.0444903	0.140596	0.126029	0.0910605	0.171395	0.0394238	0.0614883		0.250697	0.201932	0.215231	0.316131	0.149116	0.180987	0.225607	0.178757	0.192036	0.477599
233	0.187419	0.13617	0.141962	0.137247	0.0306624	0.126692	0.210798	0.219938	0.182076	0.150664	0.039603	0.172517	0.113607	0.0050622	0.106086	-0.00499685	0.182507	0.0241525	0.0912614	0.0722446	0.133718		0.142236	0.0501683	0.0423829	0.0462173	-0.0162462	0.0274917	0.0701106	0.0795406	0.0817286	0.0744264	0.120329	0.0871724	0.0443253	0.152003	0.0487402	0.034118		0.239923	0.180136	0.199778	0.312995	0.125759	0.210798	0.219938	0.182076	0.16123	0.486403
234	0.163064	0.136929	0.146215	0.143558	0.0292091	0.108788	0.152342	0.228694	0.202524	0.140689	0.0379514	0.134181	0.138125	-0.0172911	0.0948652	-0.00418242	0.178971	0.0241521	0.0972602	0.0556818	0.116525		0.102754	0.0746936	0.0435135	0.107417	0.0184975	0.0434005	0.0668014	0.097703	0.0687159	0.0722693	0.15058	0.121255	0.0642958	0.139199	0.0378084	0.0432508		0.255719	0.190936	0.205375	0.315343	0.10048	0.152342	0.228694	0.202524	0.16595	0.45548
235	0.181912	0.129797	0.135748	0.137736	0.0329235	0.128447	0.174445	0.221384	0.215387	0.148893	0.0166639	0.147384	0.138179	-0.00379491	0.107946	-0.0256375	0.168382	0.0200656	0.0942768	0.0795444	0.132914		0.14292	0.0761186	0.023365	0.0930453	0.0131104	0.00755579	0.0373813	0.0902862	0.080572	0.0646156	0.115824	0.0965948	0.116334	0.126028	0.0273126	0.10769		0.252833	0.195551	0.20168	0.316704	0.107886	0.174445	0.221384	0.215387	0.163827	0.461024
236	0.170102	0.118656	0.1586	0.168736	0.0350233	0.147815	0.193391	0.216771	0.224944	0.154918	-0.0120014	0.140815	0.133709	0.0114997	0.0965658	-0.0218428	0.176869	0.0288603	0.0735784	0.0806738	0.153097		0.132936	0.0826434	0.0698341	0.115933	-0.00110464	0.00311967	0.0610993	0.121261	0.0580463	0.0762538	0.118221	0.0937853	0.082503	0.153881	0.0589831	0.063059		0.238494	0.195821	0.188276	0.298049	0.114009	0.193391	0.216771	0.224944	0.173621	0.472497
237	0.157423	0.114066	0.143554	0.141122	0.0148132	0.171659	0.21761	0.231521	0.217544	0.169702	-0.00603346	0.145929	0.138684	-0.0202379	0.10433	0.0117601	0.177629	-0.00341192	0.0711895	0.0889045	0.118026		0.114875	0.063054	0.0543397	0.0980115	0.0122944	0.057063	0.0635218	0.12061	0.074619	0.0994114	0.129149	0.106593	0.0939324	0.137938	0.0471538	0.0399492		0.259703	0.184121	0.189882	0.299476	0.112495	0.21761	0.231521	0.217544	0.155194	0.478127
238	0.176172	0.129173	0.173035	0.162217	0.0254215	0.135342	0.181834	0.233257	0.224187	0.163684	-0.0221358	0.175424	0.136041	-0.0337128	0.0924737	0.00956457	0.190767	0.0072275	0.0951455	0.0790758	0.141075		0.120995	0.0837529	0.0489187	0.145779	0.0271523	0.0242616	0.0527102	0.112586	0.09365	0.0713879	0.1398	0.0975248	0.0702599	0.086766	0.0461012	0.0433078		0.235146	0.201426	0.199873	0.317491	0.104147	0.181834	0.233257	0.224187	0.183325	0.465245
239	0.188985	0.144501	0.171932	0.135848	0.0336721	0.154172	0.213815	0.224583	0.209589	0.180612	-0.00625811	0.144622	0.129123	-0.00202147	0.107167	-0.0448282	0.145019	0.017113	0.0768695	0.0650036	0.122201		0.141113	0.0669489	0.100646	0.108896	0.0182336	0.049324	0.054788	0.130984	0.079417	0.0736264	0.134449	0.0876349	0.12372	0.121784	0.0590777	0.0488412		0.237833	0.190156	0.204413	0.306513	0.105156	0.213815	0.224583	0.209589	0.163029	0.472368
240	0.149129	0.123381	0.182016	0.154319	0.0540995	0.154002	0.20414	0.230164	0.222639	0.165585	0.0166754	0.134157	0.134078	-0.0269351	0.09592	-0.00392753	0.181197	0.0392382	0.093777	0.0919619	0.128472		0.196247	0.0439272	0.0477515	0.088922	0.0304047	0.0519553	0.0295374	0.113543	0.0762538	0.0702818	0.131044	0.128769		0.092502	0.0348619	0.0340355		0.237006	0.185347	0.18764	0.302616	0.117126	0.20414	0.230164	0.222639	0.16954	0.503711
241	0.149129	0.123381	0.182016	0.154319	0.0540995	0.154002	0.20414	0.230164	0.222639	0.165585	0.0166754	0.134157	0.134078	-0.0269351	0.09592	-0.00392753	0.181197
[truncated: 29 more columns]
