# Supplementary material for: ESCO1 and CTCF enable formation of long chromatin loops by protecting cohesinSTAG1 from WAPL
Source: eLife. 2020 Feb 17;9:e52091. doi: 10.7554/eLife.52091 (PMC7054000; doi:10.7554/eLife.52091)
Supplement: Figure 3—figure supplement 1—source data 2. [file elife-52091-fig3-figsupp1-data2.xlsx]

## Sheet: Sheet1
-	control RNAi G1																					ESCO1 RNAi #1 G1													ESCO1 RNAi #2 G1
0	1	1	1	1	1	1	1	1	1	1	1	1	1	1	1	1	1	1	1	1	1	1	1	1	1	1	1	1	1	1	1	1	1	1	1	1	1	1	1	1	1	1	1	1	1
1	0.995218	0.990299	0.969549	0.947342	0.965489	1.01244	0.986127	0.986498	0.979619	0.991431	1.00007	1.0127	1.00244	0.994042	1.00066	1.04488	1.01803	0.965961	0.962388	0.95233	0.96446	0.95249	0.95946	0.941367	0.945178	1.02079	0.935995	0.907416	0.946628	0.955829	0.978224	0.965876	0.940326	0.990331	0.984939	0.968653	1.00165	0.988938	0.971445	0.975349	0.995993	0.990257	0.962074	0.956982	0.965763
2	0.912671	0.890393	0.865114	0.843124	0.930937	0.968888	0.935376	0.88954	0.910895	0.841908	0.855393	0.902202	0.888759	0.887736	0.909018	0.935801	0.906552	0.796755	0.850865	0.879178	0.934083	0.882646	0.881944	0.810778	0.863373	0.947312	0.805277	0.725984	0.786288	0.84728	0.843749	0.829136	0.80266	0.859447	0.891708	0.818377	0.876906	0.902001	0.848737	0.827159	0.827981	0.871796	0.824002	0.835789	0.82771
3	0.891803	0.829486	0.808308	0.77145	0.875514	0.915629	0.895547	0.87657	0.899974	0.821421	0.799532	0.838371	0.825475	0.819575	0.868777	0.86067	0.879677	0.725522	0.786039	0.838363	0.895243	0.829763	0.840827	0.725952	0.847782	0.925899	0.695344	0.653162	0.736516	0.789959	0.771799	0.761031	0.743797	0.815407	0.809891	0.746161	0.831007	0.864085	0.791382	0.728299	0.753345	0.77496	0.726843	0.766919	0.780114
4	0.84176	0.807504	0.761494	0.702684	0.820954	0.866873	0.865912	0.813864	0.861702	0.741473	0.777005	0.819667	0.765618	0.791632	0.823957	0.82437	0.83622	0.719123	0.760479	0.777358	0.924163	0.774728	0.793095	0.636873	0.746339	0.807173	0.634206	0.610854	0.631477	0.699565	0.706136	0.708854	0.665893	0.753832	0.777285	0.701622	0.775657	0.83267	0.740049	0.658565	0.680954	0.652244	0.686434	0.719432	0.695838
5	0.834332	0.769204	0.713506	0.677713	0.768408	0.83599	0.827813	0.783274	0.838347	0.727983	0.698436	0.751021	0.720367	0.728944	0.773791	0.753107	0.816175	0.616468	0.711697	0.714603	0.793995	0.715571	0.746619	0.599978	0.715726	0.75646	0.627283	0.555975	0.586431	0.682022	0.670503	0.661079	0.602804	0.732123	0.724539	0.652342	0.755104	0.773082	0.667261	0.595209	0.628955	0.63254	0.631623	0.669833	0.631727
6	0.792878	0.741348	0.684099	0.630424	0.759553	0.807448	0.779626	0.767726	0.817444	0.674765	0.664679	0.749798	0.69639	0.70261	0.741737	0.696167	0.756752	0.57955	0.67198	0.694112	0.79074	0.678005	0.699025	0.530803	0.673403	0.71629	0.570527	0.51901	0.584061	0.601302	0.63797	0.619918	0.5648	0.688414	0.677045	0.607096	0.695492	0.757993	0.619011	0.533888	0.586549	0.604005	0.59405	0.635009	0.563749
7	0.759153	0.712593	0.649173	0.59704	0.713182	0.764675	0.761294	0.741953	0.782955	0.649418	0.620919	0.751875	0.666488	0.656437	0.69706	0.720415	0.742386	0.576352	0.636287	0.646427	0.804934	0.631137	0.704018	0.482377	0.669862	0.658896	0.548972	0.477226	0.543913	0.605736	0.622431	0.567918	0.519838	0.636516	0.660985	0.577579	0.673685	0.712433	0.567994	0.483927	0.536684	0.566582	0.558833	0.597386	0.540517
8	0.725273	0.705152	0.615695	0.592633	0.669213	0.723865	0.73522	0.700599	0.756238	0.585194	0.587928	0.704853	0.656905	0.62825	0.735045	0.669979	0.677895	0.510342	0.615407	0.61196	0.78002	0.607975	0.659047	0.459491	0.660401	0.644827	0.520901	0.440723	0.48677	0.582758	0.556256	0.537869	0.478767	0.617195	0.607629	0.550409	0.619543	0.684766	0.533901	0.460501	0.504289	0.499359	0.516912	0.555943	0.458439
9	0.713948	0.678109	0.621725	0.553723	0.693606	0.722973	0.699235	0.692911	0.760203	0.606514	0.557529	0.667146	0.656177	0.596566	0.717763	0.597311	0.652743	0.472709	0.598237	0.553802	0.74015	0.581389	0.667469	0.424066	0.623306	0.593288	0.488359	0.418173	0.510432	0.580594	0.566347	0.521503	0.449323	0.595846	0.588642	0.501981	0.607319	0.636353	0.467536	0.449917	0.503673	0.465537	0.463781	0.509058	0.418713
10	0.712861	0.659028	0.603809	0.545751	0.660492	0.702385	0.692963	0.651586	0.746487	0.585314	0.559144	0.655191	0.635129	0.576077	0.710277	0.630853	0.650433	0.473808	0.564574	0.523099	0.763942	0.553594	0.643717	0.378361	0.597062	0.542935	0.48343	0.382655	0.467236	0.548367	0.519797	0.489596	0.432242	0.544059	0.560214	0.480512	0.536906	0.622278	0.445706	0.428257	0.489451	0.427275	0.421175	0.475269	0.424952
11	0.707601	0.61955	0.591161	0.527085	0.648073	0.638829	0.65281	0.628371	0.703876	0.569854	0.503327	0.634007	0.59225	0.552351	0.689227	0.635808	0.62287	0.447757	0.56179	0.558382	0.733252	0.532593	0.602317	0.333344	0.568495	0.475949	0.454566	0.367739	0.408614	0.51188	0.510403	0.48296	0.413403	0.529014	0.530832	0.448353	0.559433	0.559645	0.431443	0.366666	0.492625	0.431258	0.409589	0.452906	0.444459
12	0.687567	0.62055	0.581394	0.51619	0.612689	0.623037	0.622044	0.634153	0.713152	0.582562	0.488962	0.623208	0.575667	0.523681	0.664243	0.581339	0.611143	0.42874	0.549246	0.507535	0.707721	0.516968	0.571197	0.336909	0.540628	0.491156	0.428852	0.328587	0.42651	0.487643	0.500678	0.459524	0.410031	0.527519	0.49608	0.432539	0.551116	0.577244	0.405473	0.348693	0.453335	0.386943	0.383383	0.423554	0.389832
13	0.651231	0.59543	0.550896	0.492907	0.567043	0.610042	0.594366	0.63641	0.684199	0.54018	0.486943	0.616147	0.552198	0.512117	0.650749	0.567964	0.594954	0.429402	0.552254	0.509864	0.746777	0.496486	0.544656	0.301232	0.535091	0.49059	0.403061	0.309748	0.453345	0.467933	0.45989	0.430946	0.383613	0.500264	0.488566	0.395246	0.543713	0.501889	0.401436	0.34725	0.431145	0.360949	0.357387	0.391023	0.345095
14	0.670953	0.566245	0.532209	0.496354	0.532788	0.620379	0.575812	0.607164	0.678098	0.527231	0.444623	0.60373	0.522767	0.466171	0.630756	0.617791	0.531336	0.388737	0.534835	0.501264	0.686688	0.474295	0.507241	0.271426	0.51529	0.467735	0.376439	0.293097	0.38115	0.445612	0.436822	0.412069	0.347476	0.479492	0.455758	0.374081	0.514778	0.511419	0.391255	0.328448	0.402615	0.349051	0.333439	0.387251	0.319167
15	0.650797	0.58574	0.52572	0.489558	0.504054	0.571349	0.557256	0.600559	0.668527	0.499237	0.438027	0.584907	0.513164	0.472468	0.62088	0.552478	0.525583	0.354405	0.505835	0.476232	0.695162	0.453832	0.510104	0.243141	0.487728	0.48287	0.364557	0.277541	0.366457	0.426649	0.425604	0.375462	0.313892	0.439783	0.432107	0.390477	0.447488	0.514549	0.366536	0.281942	0.325553	0.333611	0.313409	0.376903	0.285131
16	0.635881	0.582128	0.486934	0.46319	0.502682	0.539506	0.558845	0.580215	0.658347	0.497562	0.413279	0.564572	0.497537	0.461542	0.610445	0.533542	0.54412	0.381982	0.526414	0.480168	0.712282	0.428733	0.505202	0.240499	0.488575	0.47011	0.342831	0.253162	0.360877	0.432045	0.40278	0.367892	0.307828	0.433429	0.408833	0.348734	0.44863	0.491335	0.353701	0.243103	0.360087	0.263189	0.292278	0.360957	0.295935
17	0.605083	0.57296	0.489289	0.443383	0.518761	0.499875	0.541664	0.564622	0.656407	0.493283	0.406646	0.548516	0.496521	0.44457	0.577354	0.488184	0.508223	0.341262	0.48156	0.477397	0.650447	0.41707	0.469285	0.217954	0.450442	0.419881	0.323947	0.259639	0.345297	0.423125	0.39676	0.341487	0.303175	0.440721	0.401336	0.343704	0.452103	0.441138	0.35097	0.233376	0.294289	0.232215	0.252588	0.338886	0.284844
18	0.576861	0.551959	0.476009	0.440406	0.529949	0.53102	0.542946	0.53754	0.612657	0.482419	0.388778	0.537691	0.471377	0.413407	0.568127	0.465874	0.480274	0.34326	0.484951	0.441232	0.711552	0.40347	0.42016	0.193575	0.425988	0.439923	0.305645	0.249815	0.364471	0.420414	0.384452	0.338773	0.287229	0.404952	0.402163	0.330879	0.392965	0.342409	0.324828	0.233422	0.321468	0.233346	0.24478	0.319657	0.293776
19	0.581318	0.53429	0.456527	0.41497	0.474575	0.532178	0.549491	0.565533	0.610337	0.471573	0.383373	0.513233	0.46031	0.397308	0.566713	0.455118	0.490123	0.334132	0.461186	0.401658	0.634957	0.393129	0.395609	0.216018	0.415532	0.417212	0.301067	0.247773	0.316771	0.408359	0.367356	0.329196	0.283375	0.398202	0.351893	0.319416	0.358693	0.370228	0.344123	0.228338	0.274623	0.229873	0.233445	0.316111	0.271321
20	0.567639	0.533502	0.439089	0.396398	0.425863	0.505416	0.520386	0.522737	0.597332	0.454645	0.385413	0.526539	0.460012	0.382628	0.565038	0.454208	0.522305	0.344924	0.456753	0.427308	0.633933	0.381825	0.392636	0.1823	0.381985	0.394923	0.251884	0.232662	0.305562	0.393618	0.335827	0.325789	0.268284	0.370365	0.366149	0.30095	0.347704	0.363028	0.315225	0.216027	0.261107	0.199815	0.227144	0.314466	0.245229
21	0.554771	0.525958	0.453072	0.37607	0.408276	0.461676	0.50855	0.522741	0.586913	0.414422	0.376008	0.503629	0.434397	0.37663	0.556123	0.441	0.491312	0.33413	0.461183	0.387431	0.575767	0.354009	0.358595	0.156355	0.370151	0.392977	0.248095	0.21904	0.35452	0.411604	0.340046	0.301006	0.251025	0.385937	0.354331	0.296758	0.330217	0.333505	0.331471	0.203038	0.269775	0.198165	0.218041	0.294219	0.214683
22	0.53602	0.530023	0.430343	0.369922	0.39348	0.447792	0.511669	0.520093	0.593855	0.434203	0.36138	0.50792	0.419097	0.347966	0.543059	0.401471	0.455797	0.334832	0.462095	0.419513	0.615784	0.340141	0.368915	0.141151	0.393054	0.349515	0.245011	0.228525	0.33579	0.388231	0.327448	0.299224	0.2339	0.365973	0.337572	0.267772	0.323716	0.313048	0.301258	0.206919	0.256265	0.189151	0.223121	0.29041	0.243243
23	0.543124	0.51238	0.45018	0.35642	0.361542	0.426632	0.48359	0.497759	0.584307	0.436257	0.357617	0.454007	0.428375	0.358743	0.516536	0.419707	0.458287	0.296851	0.44222	0.390658	0.610538	0.343385	0.336854	0.133796	0.379506	0.347222	0.235354	0.198576	0.33954	0.393692	0.322796	0.272557	0.211658	0.373961	0.301249	0.245769	0.316701	0.31265	0.288888	0.19202	0.200191	0.161869	0.187265	0.292419	0.25078
24	0.540127	0.491552	0.407069	0.362549	0.383122	0.454169	0.477063	0.487974	0.588746	0.400191	0.344831	0.493925	0.392429	0.362481	0.525189	0.41634	0.450445	0.291648	0.442563	0.386947	0.613542	0.347742	0.30258	0.134942	0.396234	0.361176	0.217474	0.207514	0.304311	0.401051	0.327714	0.281366	0.200946	0.340209	0.312603	0.236444	0.299585	0.262015	0.295755	0.168541	0.215026	0.196705	0.191972	0.274722	0.234087
25	0.530467	0.493353	0.427252	0.384219	0.366322	0.408535	0.476709	0.465655	0.565913	0.393052	0.327775	0.446961	0.388783	0.335984	0.510928	0.368101	0.449203	0.269411	0.448464	0.408999	0.588872	0.317898	0.311938	0.120021	0.358684	0.323073	0.237705	0.20063	0.306901	0.344566	0.312154	0.262564	0.217542	0.357924	0.305808	0.22175	0.258808	0.291982	0.281062	0.134174	0.210072	0.146176	0.188861	0.268132	0.180038
26	0.523046	0.460914	0.398801	0.373133	0.368388	0.406917	0.462175	0.470599	0.54101	0.40571	0.33078	0.443511	0.383116	0.326584	0.505076	0.365094	0.434877	0.28704	0.451104	0.374211	0.577089	0.313912	0.287527	0.109335	0.346885	0.296679	0.225605	0.194595	0.289968	0.315907	0.268835	0.23006	0.194134	0.330175	0.270363	0.218979	0.276395	0.26447	0.28275	0.136167	0.194268	0.142144	0.186297	0.263901	0.158312
27	0.509353	0.449762	0.403987	0.380553	0.37197	0.372466	0.491351	0.443844	0.563714	0.416819	0.339152	0.457623	0.366816	0.317194	0.501222	0.34244	0.431317	0.277693	0.411439	0.331802	0.571274	0.321689	0.297609	0.0961684	0.345722	0.329974	0.213641	0.181198	0.282405	0.295512	0.296906	0.245581	0.164752	0.337969	0.27139	0.214852	0.258456	0.257675	0.286745	0.133343	0.189662	0.145771	0.178889	0.248559	0.11596
28	0.517177	0.464421	0.421079	0.367788	0.310389	0.41166	0.474762	0.413278	0.52714	0.379839	0.29686	0.433229	0.375976	0.296987	0.468426	0.357564	0.413485	0.23499	0.416804	0.330583	0.562493	0.294807	0.298691	0.0729107	0.323157	0.286683	0.213399	0.1546	0.26519	0.307724	0.260442	0.224801	0.170753	0.321571	0.24757	0.202566	0.228657	0.207739	0.305233	0.122639	0.176151	0.136446	0.170092	0.237141	0.16334
29	0.526817	0.43239	0.391361	0.35014	0.359956	0.392766	0.453399	0.424633	0.514265	0.399121	0.30254	0.423376	0.36725	0.288803	0.468819	0.323829	0.429651	0.244797	0.402676	0.342891	0.547849	0.275403	0.261692	0.0953861	0.326498	0.302622	0.207311	0.128438	0.299027	0.282315	0.249696	0.213306	0.134195	0.316418	0.242757	0.213018	0.247484	0.222215	0.288797	0.111915	0.195622	0.123098	0.140593	0.230024	0.120623
30	0.550998	0.438261	0.413246	0.340593	0.354632	0.365267	0.444188	0.439613	0.528525	0.376969	0.293961	0.421995	0.354727	0.275437	0.470274	0.338532	0.421916	0.257823	0.403505	0.353018	0.544195	0.273873	0.30262	0.0766253	0.329545	0.239174	0.206354	0.155487	0.272569	0.260647	0.264618	0.20611	0.122428	0.31114	0.223012	0.174394	0.219316	0.220589	0.292617	0.0839654	0.164199	0.116471	0.13283	0.239671	0.142527
31	0.517263	0.417079	0.389846	0.327765	0.344105	0.367734	0.445023	0.417112	0.522384	0.373358	0.270455	0.445258	0.365682	0.284216	0.451157	0.336805	0.399273	0.240821	0.380873	0.338072	0.552335	0.286215	0.275815	0.0869822	0.347085	0.255035	0.1865	0.141146	0.263274	0.274373	0.229988	0.18437	0.117836	0.306107	0.224339	0.178893	0.237423	0.233597	0.270261	0.0819028	0.158698	0.116979	0.127204	0.244437	0.119232
32	0.502116	0.418343	0.359895	0.313621	0.341998	0.367088	0.444503	0.387484	0.505834	0.39298	0.304049	0.41356	0.345927	0.278919	0.450172	0.314529	0.445643	0.263509	0.400995	0.331151	0.513135	0.287356	0.262057	0.0745344	0.295977	0.203425	0.17028	0.127709	0.294925	0.270816	0.245395	0.180971	0.0879778	0.2866	0.214526	0.182605	0.202084	0.225113	0.27559	0.107694	0.1577	0.136813	0.137965	0.221192	0.101054
33	0.490744	0.426726	0.369279	0.310513	0.293313	0.357066	0.424618	0.407848	0.483146	0.368152	0.273487	0.401098	0.336251	0.254064	0.4464	0.330017	0.377719	0.21983	0.370569	0.309575	0.481218	0.270979	0.245425	0.0852792	0.293032	0.225948	0.175344	0.129276	0.267385	0.278042	0.240457	0.183361	0.0954026	0.243365	0.219442	0.162585	0.192808	0.254436	0.240653	0.0631369	0.15544	0.107719	0.135771	0.231403	0.136154
34	0.49116	0.410593	0.372125	0.326445	0.295327	0.342959	0.415438	0.404512	0.475133	0.36013	0.295179	0.376337	0.331245	0.240571	0.446989	0.324986	0.407616	0.233261	0.372603	0.322932	0.468657	0.247283	0.237194	0.0435139	0.28507	0.239684	0.139502	0.150698	0.25196	0.260386	0.236695	0.159135	0.06946	0.239982	0.218844	0.170368	0.193372	0.174707	0.232024	0.078422	0.169233	0.11759	0.123719	0.239693	0.0864101
35	0.485383	0.423011	0.362199	0.332811	0.298669	0.346401	0.396838	0.394556	0.489739	0.350986	0.257707	0.375455	0.335751	0.223417	0.42211	0.295965	0.417362	0.215316	0.375037	0.307862	0.493914	0.24896	0.220386	0.050236	0.256842	0.249406	0.147048	0.153713	0.223125	0.25103	0.224877	0.152407	0.0615674	0.242343	0.210568	0.181721	0.194935	0.173769	0.234894	0.0786467	0.145608	0.0845315	0.121242	0.232504	0.0738025
36	0.472897	0.422023	0.360473	0.327032	0.280875	0.335514	0.386334	0.393923	0.437423	0.364057	0.250582	0.354718	0.339489	0.207575	0.414495	0.295081	0.38149	0.204198	0.348896	0.300066	0.488227	0.23057	0.234715	0.0426535	0.256962	0.219025	0.125602	0.130327	0.232594	0.22013	0.21596	0.155272	0.0583896	0.205428	0.203945	0.130495	0.213132	0.165726	0.232161	0.0865719	0.149374	0.107288	0.11286	0.216722	0.0788527
37	0.466028	0.399233	0.354454	0.303415	0.267362	0.362539	0.360174	0.388056	0.462937	0.344484	0.221589	0.338348	0.32963	0.222859	0.416619	0.302108	0.393463	0.202384	0.367004	0.280675	0.488613	0.226877	0.208573	0.0626662	0.245537	0.243944	0.15028	0.141869	0.200888	0.203847	0.232396	0.137704	0.0583006	0.206694	0.192733	0.143224	0.177896	0.137124	0.231174	0.066398	0.138958	0.0990385	0.102126	0.222798	0.103206
38	0.439256	0.377705	0.34557	0.285438	0.278379	0.314233	0.359886	0.348619	0.42189	0.363073	0.230216	0.33366	0.320241	0.20239	0.412165	0.350164	0.37947	0.191914	0.365963	0.272891	0.49377	0.221876	0.159032	0.0273441	0.210472	0.20579	0.146093	0.145728	0.208453	0.187026	0.252956	0.119219	0.047586	0.230866	0.202846	0.127284	0.167132	0.196721	0.216734	0.0669413	0.124724	0.0735089	0.0848923	0.225982	0.0683
39	0.453948	0.342292	0.360144	0.291715	0.285579	0.329292	0.353255	0.345512	0.413127	0.341638	0.238828	0.342253	0.320462	0.195993	0.409953	0.284859	0.374747	0.197004	0.339632	0.276333	0.458224	0.211572	0.173728	0.0400906	0.208225	0.197953	0.134463	0.131595	0.223346	0.204146	0.223695	0.129838	0.0523615	0.229875	0.211695	0.12578	0.148219	0.144867	0.220847	0.105056	0.186114	0.139754	0.0861239	0.202572	0.0787999
40	0.438177	0.362557	0.364756	0.28558	0.266395	0.311584	0.334457	0.355601	0.41661	0.317029	0.240254	0.340612	0.32053	0.175965	0.388763	0.294645	0.358883	0.190541	0.368962	0.267667	0.490253	0.226579	0.167875	0.0256074	0.230279	0.221215	0.116159	0.110844	0.217598	0.181552	0.220685	0.131342	0.0660064	0.249834	0.180161	0.127391	0.168051	0.181188	0.214707	0.0982957	0.125647	0.0924848	0.055686	0.189878	0.0559325
41	0.417539	0.34136	0.350945	0.294174	0.263792	0.281945	0.332834	0.333184	0.416362	0.298919	0.226041	0.361872	0.31493	0.202369	0.406826	0.297917	0.368309	0.182087	0.327823	0.267471	0.435417	0.212855	0.120861	0.0526448	0.201493	0.200072	0.0985602	0.127538	0.243497	0.185155	0.205751	0.120768	0.044974	0.224838	0.168724	0.107094	0.182464	0.154832	0.198031	0.0741256	0.110035	0.0678037	0.0522294	0.191348	0.0581062
42	0.422888	0.332373	0.346459	0.267677	0.263118	0.293331	0.316754	0.339899	0.409458	0.299345	0.218847	0.339261	0.309903	0.183796	0.379447	0.274725	0.36274	0.186251	0.32199	0.272342	0.416952	0.20345	0.150761	0.0289934	0.194832	0.158261	0.108334	0.111472	0.201539	0.192776	0.189785	0.130404	0.0510326	0.218794	0.177689	0.127424	0.161109	0.129446	0.202457	0.0557722	0.133179	0.0281255	0.0560852	0.190233	0.0779794
43	0.410703	0.317295	0.371	0.279732	0.272332	0.298962	0.31561	0.362254	0.427423	0.320913	0.193545	0.343546	0.296268	0.21579	0.397157	0.251803	0.373896	0.149623	0.327658	0.252776	0.443507	0.195764	0.124461	0.0271953	0.193123	0.14095	0.0820421	0.129017	0.186301	0.200961	0.20444	0.137871	0.0455944	0.21849	0.178986	0.140292	0.183636	0.102467	0.196885	0.0883152	0.0792409	0.0667241	0.0464761	0.177043	0.0484368
44	0.387211	0.304282	0.356477	0.24214	0.223243	0.324019	0.308551	0.375673	0.424526	0.297091	0.21727	0.32686	0.30379	0.204615	0.387875	0.273556	0.355367	0.176432	0.334407	0.27628	0.417801	0.188874	0.114865	0.0249316	0.183867	0.145357	0.0713653	0.109212	0.158396	0.213191	0.177686	0.143414	0.0430401	0.195492	0.185389	0.121713	0.142938	0.147433	0.211234	0.0419573	0.0723123	0.0700211	0.07529	0.169221	0.0626918
45	0.384663	0.32887	0.367148	0.262235	0.238396	0.290916	0.306371	0.35609	0.388662	0.312156	0.228708	0.296082	0.295827	0.1884	0.375195	0.26504	0.384461	0.181248	0.299296	0.253376	0.389247	0.196657	0.123998	0.0362724	0.180464	0.176678	0.0669683	0.10865	0.179323	0.203869	0.165436	0.111814	0.0610041	0.19727	0.167429	0.0909715	0.141493	0.122875	0.14358	0.0473869	0.0942449	0.102105	0.086091	0.155136	0.065932
46	0.389986	0.322785	0.36661	0.264527	0.203083	0.308823	0.317157	0.361461	0.390098	0.295213	0.198947	0.323697	0.304617	0.18571	0.361697	0.254872	0.339056	0.154491	0.331782	0.2528	0.412821	0.19051	0.106553	0.00621456	0.160595	0.173785	0.0933659	0.104523	0.137851	0.199464	0.164426	0.104927	0.0291996	0.17931	0.160144	0.113709	0.160944	0.135587	0.14114	0.0570441	0.149876	0.080717	0.0703865	0.135568	0.0342285
47	0.386339	0.312264	0.349533	0.273377	0.234864	0.29113	0.301683	0.351001	0.413536	0.286145	0.205123	0.340475	0.284351	0.17792	0.356218	0.232141	0.352476	0.154513	0.288105	0.219473	0.401338	0.171082	0.0995034	0.0176406	0.174902	0.128487	0.0888502	0.112963	0.143722	0.188479	0.166007	0.129684	0.0438537	0.181198	0.170615	0.0693937	0.142609	0.0795478	0.130674	0.0578073	0.0983788	0.0622613	0.0848687	0.147673	0.040285
48	0.373595	0.33696	0.351204	0.260789	0.223671	0.296999	0.334831	0.340491	0.424437	0.316019	0.220252	0.334656	0.295981	0.155147	0.36481	0.227074	0.342069	0.164102	0.30363	0.218669	0.405073	0.171448	0.0974574	0.0182112	0.156076	0.157761	0.0631801	0.106195	0.163671	0.19802	0.149598	0.102179	0.0489806	0.177206	0.161593	0.0639017	0.174484	0.0941506	0.139026	0.063048	0.11382	0.0793961	0.0856324	0.145176	0.0183738
49	0.381533	0.353589	0.343767	0.259154	0.199541	0.285178	0.305699	0.3144	0.376913	0.30074	0.211147	0.320594	0.285986	0.165969	0.337606	0.270176	0.338087	0.171976	0.30595	0.221396	0.389023	0.179939	0.0872909	-0.0053022	0.130277	0.105646	0.0979122	0.102583	0.154592	0.158608	0.136604	0.093501	0.0276846	0.174277	0.152671	0.070934	0.164231	0.12766	0.111216	0.0367731	0.0764542	0.0614597	0.0749981	0.114023	0.0660818
50	0.37402	0.335621	0.338184	0.275589	0.20458	0.301483	0.327785	0.326527	0.387193	0.320855	0.215013	0.308393	0.29581	0.147461	0.351136	0.261923	0.331393	0.172559	0.293952	0.210036	0.421697	0.189991	0.118408	-0.0043428	0.124475	0.101062	0.0862043	0.0901997	0.149395	0.162428	0.133593	0.09563	0.0148761	0.145876	0.140678	0.069325	0.153936	0.102143	0.115578	0.0511785	0.0610811	0.0455866	0.0836604	0.143574	0.0281168
51	0.395479	0.327244	0.34364	0.257213	0.182716	0.289464	0.309734	0.300653	0.397972	0.2916	0.184704	0.297553	0.264066	0.160105	0.342893	0.252588	0.336778	0.146797	0.347673	0.198222	0.397986	0.16577	0.107187	-0.0143621	0.127036	0.126867	0.0732786	0.0765306	0.161517	0.146259	0.155868	0.0704129	0.00446087	0.151369	0.148638	0.066953	0.149987	0.0718955	0.133412	0.0353313	0.0506839	0.049816	0.0800649	0.120849	0.0178343
52	0.384311	0.339891	0.337189	0.270079	0.161229	0.263833	0.29674	0.313096	0.387438	0.302207	0.198561	0.310831	0.289082	0.159176	0.346612	0.259672	0.317456	0.172361	0.258036	0.205512	0.437913	0.167541	0.0832112	-0.0092291	0.121208	0.108443	0.0813091	0.072911	0.140406	0.140447	0.12954	0.0814756	0.00420024	0.160431	0.119392	0.0629944	0.168886	0.0590001	0.10692	0.0259984	0.0813471	0.00695949	0.0539546	0.134846	0.0254694
53	0.382578	0.336607	0.340879	0.271984	0.1837	0.267339	0.289636	0.311926	0.390728	0.304414	0.194575	0.281076	0.271965	0.196332	0.34981	0.256294	0.311111	0.148354	0.282615	0.199599	0.390839	0.166494	0.127219	-0.0145492	0.109297	0.096898	0.0828568	0.0846747	0.15157	0.120359	0.11176	0.0697329	0.00214785	0.12934	0.138112	0.051021	0.149551	0.0923937	0.113628	0.0313921	0.109875	0.0220702	0.0555458	0.121169	0.0211956
54	0.362953	0.345376	0.356381	0.242324	0.183481	0.282347	0.293517	0.304985	0.357854	0.272905	0.207626	0.289497	0.278944	0.166176	0.326809	0.29122	0.298663	0.19019	0.282405	0.211304	0.378584	0.174806	0.127687	-0.0276952	0.0930572	0.0967616	0.0950303	0.0897552	0.12859	0.102288	0.11226	0.0585487	0.0185112	0.135071	0.108241	0.0554609	0.128099	0.147325	0.111621	0.0125991	0.0869141	0.0375257	0.0451144	0.109426	0.0256475
55	0.362817	0.353263	0.342175	0.265162	0.204631	0.261812	0.288197	0.317241	0.368586	0.306866	0.197324	0.281843	0.279773	0.149237	0.338557	0.272751	0.316452	0.166774	0.276465	0.178813	0.372589	0.156904	0.0977983	-0.0363946	0.093923	0.080845	0.0603672	0.0803763	0.150731	0.122429	0.107698	0.0660807	0.0490288	0.119332	0.124567	0.0491088	0.0984406	0.115782	0.0799579	0.0387489	0.0928388	0.0356295	0.0295984	0.0944944	0.0369588
56	0.346114	0.344702	0.35005	0.250914	0.190964	0.245594	0.267297	0.306468	0.373125	0.312717	0.172683	0.301729	0.277806	0.146554	0.324764	0.273932	0.313236	0.144999	0.280436	0.19077	0.392369	0.146446	0.111154	-0.0454739	0.0912824	0.0912729	0.0739462	0.077344	0.133131	0.123329	0.10109	0.0581976	0.0321692	0.102028	0.141783	0.0629326	0.151376	0.0938717	0.0803104	0.0467135	0.0665218	0.0420437	0.0310122	0.072943	0.0333495
57	0.33538	0.344951	0.358141	0.240931	0.177431	0.253765	0.275246	0.295669	0.365436	0.274905	0.150626	0.29354	0.284026	0.15308	0.321003	0.290183	0.297442	0.135336	0.273201	0.161449	0.371216	0.151437	0.12906	-0.046441	0.11302	0.101676	0.0770559	0.0828401	0.132708	0.116045	0.105426	0.0675469	0.0468511	0.108481	0.133965	0.0617216	0.148287	0.0218845	0.0604852	0.0510286	0.10591	-0.0048657	0.0384243	0.0659604	0.0286266
58	0.33924	0.34826	0.334122	0.244999	0.131103	0.231115	0.27996	0.299748	0.366804	0.29138	0.161488	0.29514	0.268447	0.160184	0.308053	0.277431	0.304898	0.138728	0.252726	0.189083	0.336377	0.145554	0.115471	-0.0353042	0.107613	0.0976025	0.0629874	0.0816708	0.145142	0.108619	0.107431	0.0546924	0.0640954	0.0835459	0.13685	0.0761722	0.119353	-0.0005178	0.083272	0.0377926	0.117942	0.0106582	0.0630637	0.0533743	0.0288309
59	0.325026	0.332051	0.361491	0.225279	0.161404	0.207953	0.252637	0.283256	0.353658	0.289781	0.17096	0.276473	0.244777	0.133125	0.30302	0.266508	0.304381	0.143451	0.256407	0.171568	0.340252	0.157894	0.112634	-0.067889	0.11646	0.0914663	0.0531442	0.06717	0.134909	0.131401	0.126372	0.0546818	0.0487115	0.0936912	0.103906	0.0774143	0.104472	0.0247966	0.0908751	0.0292208	0.10407	-0.0062495	0.0846629	0.0552437	0.0243221
60	0.317862	0.33667	0.350204	0.227835	0.145702	0.212871	0.272038	0.2901	0.344462	0.310904	0.148817	0.29517	0.264299	0.147682	0.311568	0.330492	0.320638	0.141547	0.277201	0.178056	0.366853	0.153343	0.107573	-0.057137	0.0829912	0.0803209	0.0392682	0.0651445	0.116225	0.147982	0.11256	0.0531857	0.0555186	0.0973161	0.121175	0.0594418	0.0762389	0.050093	0.0717922	0.0258714	0.0686099	-0.0044174	0.0866079	0.0616786	-0.0055995
61	0.326086	0.331368	0.332081	0.225156	0.141797	0.211357	0.27655	0.299685	0.327496	0.26326	0.14879	0.283886	0.271417	0.128467	0.302158	0.29306	0.278765	0.132291	0.277634	0.166943	0.358427	0.134695	0.124059	-0.0381545	0.101883	0.0820605	0.0509254	0.0927379	0.114698	0.127026	0.0872344	0.0380824	0.0658396	0.121141	0.102776	0.0623255	0.120846	0.101602	0.0801733	0.0617887	0.0643321	0.0227471	0.0859053	0.0483586	0.0231447
62	0.315521	0.318567	0.329901	0.229502	0.120175	0.183133	0.242942	0.300364	0.318912	0.274759	0.15735	0.281497	0.266697	0.139357	0.310775	0.309865	0.268475	0.153259	0.260398	0.17448	0.35097	0.126033	0.119233	-0.0357274	0.118159	0.0391426	0.0439739	0.0738745	0.102912	0.127201	0.0802935	0.053961	0.0450613	0.104505	0.126763	0.0228593	0.109351	0.0819645	0.0589751	0.0488532	0.0335654	-0.0050501	0.0800334	0.042438	0.0187821
63	0.304228	0.278341	0.332191	0.208007	0.104076	0.19862	0.259799	0.316523	0.309791	0.303426	0.156646	0.298053	0.253245	0.131645	0.271551	0.270562	0.284353	0.134162	0.279014	0.193485	0.32315	0.113256	0.106948	-0.0394112	0.0885395	0.0702722	0.0349061	0.0920904	0.0959679	0.12873	0.079909	0.0524175	0.0186353	0.109703	0.113385	0.0761599	0.105426	0.0228786	0.0631027	0.026791	0.0421799	0.0350262	0.055918	0.0237752	-0.0096808
64	0.318657	0.274775	0.340236	0.194592	0.126955	0.204815	0.252318	0.299264	0.307209	0.26728	0.174647	0.277654	0.274338	0.115575	0.28411	0.272236	0.275317	0.151247	0.242315	0.168045	0.279551	0.117099	0.120126	-0.068344	0.0682635	0.0560154	0.0391499	0.07799	0.108757	0.105178	0.0899252	0.0505845	0.0170269	0.0942719	0.108947	0.0534765	0.0880782	0.0930072	0.0490796	0.0307013	0.0205762	0.040759	0.0435252	0.0159944	0.0158133
65	0.299831	0.285016	0.313617	0.189883	0.136553	0.200487	0.255046	0.289345	0.276297	0.31845	0.160747	0.260642	0.270206	0.126867	0.280576	0.314801	0.257063	0.144204	0.245264	0.17916	0.317023	0.132262	0.100413	-0.0534035	0.0912452	0.0598869	0.027267	0.0627789	0.0697513	0.11376	0.0875335	0.0423574	0.0269794	0.0737484	0.105346	0.0494558	0.0897142	0.0880393	0.0612071	0.0339239	0.0403132	0.0309128	0.0489429	0.0220926	0.0195221
66	0.297744	0.295467	0.288391	0.191764	0.11692	0.20269	0.244321	0.285915	0.297586	0.273048	0.146703	0.282805	0.266995	0.128164	0.266641	0.26531	0.284348	0.129297	0.265365	0.182608	0.323003	0.118593	0.101001	-0.0120676	0.130672	0.0634003	0.0273809	0.0761825	0.0755874	0.128745	0.0804788	0.0571493	0.0194123	0.0815486	0.114481	0.0566212	0.0627471	0.112331	0.0576457	0.0344187	0.0117868	0.0394395	0.0610465	0.0362986	-0.0163405
67	0.317505	0.271904	0.301626	0.197995	0.126518	0.178621	0.233933	0.307362	0.297807	0.270438	0.155667	0.276595	0.292696	0.11195	0.260235	0.230738	0.244802	0.137038	0.231593	0.182616	0.359197	0.117148	0.101143	-0.0176631	0.131409	0.0390144	0.0322195	0.0681182	0.0645734	0.0782755	0.0768041	0.0327679	0.0166019	0.0649461	0.115562	0.063016	0.0767882	0.0844873	0.064185	0.0190064	0.020457	0.0361764	0.0571943	0.0231308	-0.0345577
68	0.324045	0.277566	0.302284	0.176928	0.143062	0.179072	0.22303	0.31745	0.31677	0.25667	0.147782	0.289529	0.274483	0.116889	0.245443	0.262523	0.270853	0.111641	0.254051	0.170473	0.33122	0.106248	0.0303472	0.00261786	0.139682	0.0557237	0.0534661	0.0727864	0.0738646	0.121967	0.0626389	0.0578578	0.0182825	0.055898	0.113644	0.0634976	0.05179	0.0800883	0.0354364	0.00503308	0.042938	0.0414079	0.0270805	0.0148983	-0.0630707
69	0.319772	0.257654	0.279804	0.180156	0.134452	0.176018	0.234618	0.307459	0.307825	0.244184	0.109758	0.272851	0.268509	0.116749	0.248962	0.266931	0.23497	0.102888	0.257097	0.159116	0.336284	0.105019	0.051174	-0.0163713	0.136174	0.0630805	0.0508781	0.0566336	0.0787613	0.136942	0.0614659	0.0653446	0.0332053	0.0467699	0.114606	0.0422729	0.027981	0.0402726	0.059401	0.0274893	0.00807144	0.0660103	0.0111546	0.0301848	-0.0575728
70	0.306616	0.266992	0.263718	0.185887	0.102671	0.178501	0.208421	0.306622	0.309723	0.228375	0.093014	0.249519	0.261375	0.116277	0.250344	0.274964	0.263187	0.084289	0.249491	0.14408	0.334613	0.13555	0.0718146	-0.0388902	0.128128	0.0892873	0.0643926	0.0373624	0.0949713	0.121177	0.0615988	0.0738679	0.00430075	0.0345289	0.11347	0.0713019	0.0419284	-0.0348891	0.0504453	0.00218288	-0.0168835	0.059384	0.0281802	0.025349	-0.0443059
71	0.301172	0.284444	0.249437	0.198431	0.141789	0.193357	0.216741	0.320688	0.32637	0.261759	0.116955	0.259624	0.268523	0.112223	0.23296	0.215233	0.257351	0.103473	0.241946	0.129147	0.312075	0.116025	0.0825735	-0.065768	0.113463	0.0904991	0.0419809	0.0512909	0.0549029	0.1213	0.0665221	0.0464114	0.00029534	0.0271275	0.128193	0.0694421	0.0708666	0.0328074	0.051627	-0.019246	0.0123942	0.0191433	0.0384744	0.0138479	-0.03143
72	0.291895	0.275224	0.243898	0.201924	0.133625	0.186995	0.198282	0.312958	0.277193	0.254586	0.114805	0.235201	0.261639	0.0996651	0.253983	0.20294	0.264185	0.119581	0.226505	0.147518	0.278485	0.117589	0.0640881	-0.0609253	0.126592	0.0857858	0.025885	0.0517085	0.0659769	0.119082	0.0647394	0.0621357	-0.002845	0.0447653	0.0987524	0.0373121	0.0892543	0.077639	0.0764387	-0.0039536	-0.0256359	0.0279106	0.0309935	0.0045692	-0.0255268
73	0.293999	0.279679	0.266366	0.183046	0.131325	0.166575	0.205455	0.312263	0.297381	0.267304	0.117595	0.241632	0.272896	0.109776	0.258805	0.246916	0.262142	0.0786064	0.222303	0.110286	0.294834	0.123666	0.0547475	-0.026175	0.153212	0.0511263	0.043792	0.0622616	0.0550115	0.0971601	0.067905	0.0545538	-0.0392574	0.0294957	0.103403	0.0692635	0.0543661	0.0730306	0.0646647	0.0295302	-0.0166303	0.0255574	0.0106454	0.017434	-0.0332415
74	0.278865	0.28397	0.272038	0.179907	0.137388	0.169154	0.181174	0.299986	0.294328	0.260682	0.126862	0.251123	0.254516	0.119825	0.251333	0.239772	0.261988	0.108947	0.234879	0.144994	0.325814	0.113078	0.0822111	-0.0547109	0.16676	0.0675549	0.0161388	0.0775096	0.0311868	0.046926	0.0788327	0.0437916	-0.0390489	0.025203	0.104682	0.0448809	0.058853	0.0310336	0.058668	-0.0062587	-0.0098952	0.0270797	0.0179649	0.033131	-0.0494751
75	0.294895	0.274257	0.276136	0.158085	0.111897	0.180473	0.189288	0.296478	0.331397	0.268797	0.106817	0.254081	0.27379	0.11083	0.244433	0.215164	0.251026	0.105683	0.223918	0.142552	0.326122	0.0919439	0.0365867	-0.0106488	0.154986	0.0481361	0.0626767	0.0834932	0.0454362	0.0591553	0.0761141	0.0464599	-0.0237766	0.0411472	0.0957616	0.0498287	0.048621	0.0725298	0.060686	-0.0084081	-0.0114128	0.0207127	0.0149903	0.038968	-0.0583489
76	0.291334	0.271124	0.268715	0.153854	0.0784321	0.167404	0.181243	0.317826	0.313633	0.261708	0.118789	0.282821	0.231649	0.0917093	0.251789	0.201817	0.274626	0.110959	0.233452	0.138088	0.335516	0.102051	0.0529792	-0.0332645	0.116873	0.0539813	0.0362938	0.0789165	0.00739564	0.0624045	0.0719224	0.0478	-0.0255377	0.0272631	0.0947166	0.0672615	0.0497725	-0.0090285	0.0727909	0.0301947	0.0225963	0.041867	0.0180342	0.0328866	-0.0561952
77	0.298883	0.283687	0.254203	0.158473	0.10003	0.182795	0.181653	0.316441	0.333727	0.270373	0.0814012	0.282587	0.212771	0.119125	0.257469	0.219022	0.258146	0.078918	0.226312	0.140767	0.330772	0.0924432	0.048093	-0.0191611	0.106631	0.0570787	0.0246999	0.077784	0.0449012	0.0866981	0.0787648	0.0482841	0.00851683	0.0549795	0.0837027	0.101107	0.0509775	-0.0216199	0.0343197	0.0175043	0.0432487	0.0154742	0.0111711	0.0302681	-0.0217031
78	0.290056	0.272878	0.271057	0.176669	0.100824	0.14197	0.174601	0.316367	0.321497	0.257883	0.0881762	0.304637	0.233719	0.0964599	0.238096	0.223132	0.253051	0.0811656	0.212607	0.144039	0.32605	0.113377	0.0255667	-0.0184382	0.115759	0.0834344	0.0397454	0.0673118	0.0584434	0.0793544	0.0851698	0.0271955	0.00046986	0.0508217	0.077348	0.0770484	0.0489279	0.0618818	0.0351105	-0.0071254	0.0289238	0.0442067	0.00833017	0.0416451	-0.0190726
79	0.284282	0.24762	0.263583	0.204167	0.0978089	0.127244	0.163567	0.30095	0.309763	0.254587	0.0928057	0.259287	0.223347	0.0970446	0.241155	0.191695	0.244686	0.103492	0.235319	0.128606	0.34616	0.124507	0.02642	-0.0013222	0.0930326	0.0775504	0.0276288	0.055807	0.0675437	0.0914697	0.0498332	0.0287971	-0.0175456	0.0672627	0.0719438	0.0657515	0.0425266	0.0429816	0.0439883	0.028714	0.0253737	0.0618715	0.00750979	0.0352804	-0.0114657
80	0.276347	0.265817	0.24562	0.203829	0.105377	0.150637	0.162	0.308071	0.298137	0.244872	0.0894131	0.266536	0.22603	0.0897283	0.225872	0.192965	0.232017	0.0936771	0.190036	0.127935	0.275379	0.114858	0.0381453	-0.0309364	0.0791092	0.0829531	0.0337242	0.0535891	0.0762188	0.0893353	0.0566556	0.0412187	0.00960736	0.0553259	0.0741187	0.0538651	0.0328225	0.0292508	0.0387515	0.012047	0.00257506	0.0202303	0.0298308	0.00112401	-0.0007435
81	0.26344	0.271228	0.26974	0.204806	0.0868561	0.154834	0.170191	0.301607	0.313852	0.202511	0.0963891	0.227344	0.219994	0.0829761	0.240995	0.183662	0.22753	0.0943883	0.222818	0.134769	0.32651	0.11143	0.035694	-0.017478	0.0993357	0.09201	0.0242259	0.0517793	0.0724174	0.0525422	0.0610224	0.0382191	-0.0056407	0.0543422	0.0703023	0.0628268	0.0643982	0.0221254	0.038354	0.0199419	0.0114794	0.0654021	0.0255461	-0.0206442	-0.0359335
82	0.268329	0.27082	0.254392	0.213406	0.0591463	0.223713	0.17403	0.273382	0.307674	0.268219	0.0736181	0.223292	0.238548	0.0910501	0.244423	0.237629	0.224467	0.0599898	0.208679	0.131412	0.315499	0.11307	0.0287762	-0.0254429	0.0852116	0.053277	0.00742274	0.0425535	0.0416857	0.0430789	0.0605915	0.0317789	0.0202034	0.0858121	0.0746369	0.0684413	0.0605406	-0.0066623	0.0426625	0.0159509	0.0155168	0.067235	0.00813177	-0.0045632	-0.0269112
83	0.278773	0.276655	0.212816	0.214157	0.0949956	0.197368	0.163771	0.301948	0.30269	0.233579	0.0798242	0.243965	0.228411	0.100766	0.242408	0.1978	0.23024	0.0939535	0.213648	0.119526	0.271278	0.107322	0.0365416	-0.0068041	0.0861454	0.0410587	0.022092	0.0517	0.0805909	0.0538532	0.0567585	0.0259438	0.0112412	0.0870291	0.0768015	0.0310275	0.0334344	0.0185686	0.043134	0.0114168	0.0330947	0.00232806	0.018339	-0.0128084	-0.0315095
84	0.279382	0.277808	0.223432	0.239927	0.1034	0.202766	0.158964	0.284087	0.305951	0.254523	0.0820274	0.234032	0.209022	0.0790665	0.247566	0.21765	0.239984	0.0759307	0.195976	0.110412	0.294089	0.100984	0.0611133	0.00149454	0.0777671	0.0947698	0.015976	0.0715825	0.0543594	0.0638494	0.0462549	0.0148327	-0.0108867	0.0707998	0.076641	0.0455797	0.0336582	-0.0386742	0.047643	-0.01345	0.0492186	0.0070419	-0.0036336	-0.0177932	-0.0257436
85	0.294006	0.261083	0.267489	0.223578	0.0786577	0.212569	0.16775	0.291642	0.291634	0.262757	0.0801862	0.245825	0.219538	0.102988	0.248883	0.204345	0.22726	0.0647297	0.200883	0.101364	0.269017	0.113215	0.033024	0.0212141	0.0815417	0.0475481	0.0306094	0.05727	0.0698702	0.0597244	0.0456567	0.0152633	0.0178165	0.0712033	0.0566149	0.0328238	0.0184932	-0.0057212	0.0632214	0.00093638	0.0418367	0.00115301	0.0309245	-3.657e-05	-0.0306548
86	0.269537	0.256368	0.265436	0.212994	0.0637171	0.184965	0.166797	0.283475	0.298467	0.2562	0.106927	0.23202	0.223602	0.092753	0.226278	0.206182	0.237983	0.0885752	0.198047	0.153365	0.307387	0.0972144	0.0100563	-0.0240647	0.0854896	0.0686381	0.0228749	0.0383495	0.0566789	0.040037	0.0353049	0.0138613	-1.344e-05	0.0883082	0.0691853	0.0311273	0.071526	-0.010618	0.0485045	-0.0494016	0.0794306	0.023013	0.00465676	0.0137168	-0.0385382
87	0.283775	0.271022	0.255925	0.227277	0.0607261	0.212228	0.140607	0.292622	0.285603	0.248372	0.0966275	0.244566	0.218968	0.107318	0.241869	0.229187	0.235227	0.0854539	0.205379	0.123455	0.317063	0.106949	-0.0197945	-0.0563067	0.0832398	0.0610184	0.0231022	0.0402604	0.0367686	0.0405134	0.0488525	0.0150432	0.00649379	0.0857153	0.0706118	0.0364408	0.0379486	0.0213775	0.0454447	-0.029556	0.0250551	0.041823	0.0212249	0.0134527	-0.0231682
88	0.282259	0.273581	0.25402	0.238353	0.066136	0.161197	0.136187	0.310214	0.300166	0.243913	0.0945756	0.207079	0.2129	0.0869199	0.237355	0.17136	0.214042	0.0650023	0.187878	0.140311	0.264448	0.119608	0.00271029	-0.0304654	0.0544258	0.0579289	0.0286038	0.0465657	0.0144184	0.0721515	0.0513072	-0.0044103	-0.0187766	0.0889324	0.0635141	0.0455785	0.0392722	0.0600062	0.0319992	-0.0252048	0.0228613	0.0106525	0.00644445	0.00902904	-0.0712921
89	0.259847	0.274789	0.243683	0.208312	0.0622711	0.184936	0.168763	0.307936	0.301913	0.241328	0.0577135	0.260273	0.217322	0.0909987	0.237602	0.133469	0.232701	0.067911	0.191793	0.101316	0.267702	0.113062	0.00390365	-0.0640185	0.0676734	0.0540316	0.0144827	0.0197723	0.0476089	0.0660813	0.0736457	-0.0082783	-0.0102672	0.0406147	0.0612574	0.0285194	0.0445202	0.02899	0.0359264	-0.0307322	0.018361	0.0138551	0.0106018	0.0166728	-0.0541986
90	0.277993	0.290618	0.237449	0.213447	0.0538707	0.157625	0.14763	0.316336	0.287712	0.213253	0.0956785	0.235692	0.183288	0.093663	0.230649	0.179555	0.22365	0.104631	0.179734	0.122803	0.260233	0.108203	0.00086158	-0.0318273	0.0623898	0.0534811	0.0212227	0.0233781	0.0361739	0.0649722	0.0646364	-0.0282782	-0.0232553	0.0634992	0.0818641	0.0213174	0.041359	0.043784	0.0162198	-0.0154331	0.0412476	0.0458927	0.0163804	0.0082487	-0.0567274
91	0.28303	0.26549	0.250542	0.234819	0.0572879	0.179256	0.154717	0.306894	0.310973	0.255497	0.0988073	0.209736	0.206401	0.0567942	0.225122	0.196518	0.242663	0.0915657	0.211575	0.0911164	0.286803	0.0991902	0.0781749	-0.0381618	0.0459109	0.0599728	0.0227213	0.0267738	0.0534787	0.0326924	0.0563773	-0.0411713	-0.0331184	0.0533947	0.0583131	0.0268793	0.0526064	0.052143	0.0236534	-0.0143678	0.0435253	0.00281918	0.00199341	0.0255494	-0.0537467
92	0.276957	0.273764	0.239771	0.23835	0.0614704	0.172136	0.169289	0.298218	0.306778	0.217503	0.104096	0.217692	0.211432	0.0703779	0.231785	0.164854	0.220734	0.0970992	0.210327	0.126821	0.279187	0.107117	0.0261838	-0.0396153	0.0271456	0.0743068	-0.0144897	0.0320326	0.0534081	0.0355177	0.0510358	-0.0345615	-0.0177609	0.0590282	0.0483218	0.0269298	0.0326264	-0.0010394	0.0187519	-0.0169186	0.0474937	0.0326413	0.00143484	0.0134435	-0.10332
93	0.270953	0.27864	0.253766	0.22399	0.0845243	0.136569	0.163524	0.311183	0.281114	0.216795	0.0923394	0.220448	0.207859	0.0761606	0.22886	0.173288	0.226821	0.100722	0.158254	0.102283	0.30172	0.0979937	0.0303653	-0.0515796	0.0503333	0.0731872	0.0086017	0.0308138	0.0710721	0.0147154	0.0550755	-0.0108653	-0.0280589	0.0643153	0.0694358	0.045588	0.0244694	0.0560501	0.0350313	0.00138364	0.0354494	0.0233898	0.00851365	0.0178231	-0.0840704
94	0.258054	0.29623	0.234467	0.22594	0.0706925	0.167991	0.158119	0.321587	0.308184	0.228019	0.0693063	0.223058	0.222635	0.0823037	0.206046	0.127966	0.229251	0.0812995	0.184238	0.113553	0.284813	0.115355	0.0361934	-0.0681815	0.0435792	0.0684118	0.00624806	0.0140516	0.0219706	0.035001	0.0628932	-0.0313542	-0.0479812	0.0520347	0.0723058	0.0476016	0.030173	0.052406	0.0664267	0.00370915	0.00225916	-0.0019994	0.0183513	0.0188133	-0.0955293
95	0.277582	0.27243	0.225493	0.2354	0.0702947	0.180123	0.168295	0.327008	0.297497	0.221711	0.0775063	0.238216	0.204241	0.0796384	0.22573	0.155425	0.234885	0.0898127	0.150998	0.098414	0.268314	0.124429	0.0148132	-0.0475753	0.0482936	0.0704302	0.036473	0.0219686	0.0362152	0.0452102	0.0738915	-0.0365418	-0.0336408	0.0512831	0.0474021	0.00659815	0.0160085	0.0500921	0.0746876	0.0170804	-0.0064572	-0.0314728	0.00180106	0.0241345	-0.0896971
96	0.276242	0.274248	0.216892	0.192877	0.0809903	0.18051	0.169975	0.326542	0.306425	0.235833	0.0667374	0.237109	0.215774	0.0798673	0.21705	0.154841	0.230782	0.0884635	0.138668	0.104022	0.28494	0.110561	0.0194727	-0.0559529	0.0267999	0.00096435	0.0241214	0.0155108	0.0384381	0.03859	0.0611895	-0.0144263	-0.0285597	0.0334755	0.0537558	0.0141724	0.0378331	-0.0024269	0.0776458	0.0399914	0.0203669	-0.0112919	0.0140432	0.0132296	-0.0573128
97	0.279317	0.279871	0.186437	0.193698	0.0734631	0.189714	0.153358	0.323398	0.290084	0.236406	0.0540083	0.273906	0.206673	0.0670905	0.208304	0.116983	0.2407	0.0662084	0.176756	0.106252	0.280983	0.136041	-0.0139721	-0.0665381	0.0414969	0.081527	0.0412805	0.0156775	0.0501088	0.080703	0.0657379	-0.0123967	-0.0320261	0.0505951	0.0113456	0.0340476	0.0449941	0.0682228	0.0951	0.00120238	0.00410423	0.0192508	0.0180266	0.0262527	-0.0762288
98	0.262545	0.267844	0.215051	0.198283	0.0400789	0.212706	0.159633	0.322561	0.298306	0.216524	0.0651403	0.242658	0.23024	0.0656878	0.202646	0.143595	0.231792	0.0825045	0.199875	0.0728862	0.273953	0.12216	-0.0271187	-0.0232941	0.0118271	0.0729049	0.0334635	0.0109288	0.0320979	0.0480544	0.0521887	0.00474051	-0.0272806	0.0356796	0.0374384	0.0325291	0.00225787	0.0520822	0.0740481	0.00923329	0.0289863	-0.0202946	0.0145817	0.0162747	-0.0310927
99	0.267944	0.247149	0.230163	0.197519	0.0591032	0.189315	0.169832	0.325206	0.283749	0.226634	0.0823831	0.220945	0.225632	0.0591883	0.19842	0.161318	0.221392	0.0948133	0.181919	0.0810782	0.256153	0.110858	-0.0250638	-0.0305032	0.0675278	0.0831566	0.0313589	0.0123935	0.061667	0.0540501	0.0627433	0.00888665	-0.0112545	0.0475353	0.0359823	0.0189449	0.0441966	0.0698987	0.0395289	0.00808513	0.00651441	-0.005913	0.0107024	0.0293304	-0.0363489
100	0.282466	0.25269	0.233109	0.173634	0.0668003	0.192024	0.167909	0.324059	0.268146	0.189441	0.0445661	0.224577	0.229362	0.0769603	0.192894	0.175823	0.217861	0.0784766	0.168982	0.0861911	0.285988	0.130164	-0.0021585	-0.0402495	0.0581649	0.0850476	0.0168378	0.00335492	0.0449252	0.0512963	0.0744049	-0.0010039	-0.0215019	0.042582	0.0440517	0.0303132	0.0207027	0.0761574	0.048253	-0.0110538	0.0490266	-0.0037229	0.0284723	-0.0064855	-0.0241845
101	0.273982	0.245482	0.235986	0.206615	0.073178	0.195129	0.160345	0.355027	0.244429	0.208041	0.0477256	0.213548	0.222583	0.0549718	0.176033	0.168543	0.190538	0.0940516	0.171662	0.0677118	0.261878	0.109849	-0.023553	-0.0254037	0.0952379	0.0569555	0.0212113	0.00665131	0.0532559	0.080021	0.074167	0.0114814	-0.0201791	0.0397674	0.0480394	0.0555114	0.0393075	0.0817318	0.018294	0.00965228	-0.0057507	-0.010993	0.0188228	0.0106955	-0.0107114
102	0.264084	0.271592	0.235361	0.174537	0.0507306	0.185399	0.172327	0.324531	0.276961	0.18461	0.0338498	0.226924	0.205022	0.0719728	0.203816	0.17907	0.205964	0.0710164	0.169614	0.0546128	0.284123	0.109079	-0.0205907	-0.0418479	0.0370579	0.0535987	0.0177518	-0.0004913	0.0504816	0.0826073	0.0481571	0.0197673	0.00265455	0.0359704	0.0292999	0.0286601	0.0579057	0.0989765	0.0751691	0.00850688	0.0318766	0.00175016	0.0371677	-0.0071587	-0.0296213
103	0.265491	0.262975	0.225275	0.168597	0.0687166	0.218614	0.162033	0.312214	0.310422	0.196934	0.047642	0.239251	0.206717	0.0473162	0.18442	0.162608	0.212686	0.0801026	0.147458	0.0639621	0.310788	0.13438	-0.0195371	-0.0145292	0.0315916	0.085775	0.0339421	0.0140369	0.0584508	0.0460895	0.0405725	0.00660141	0.0128518	0.0533792	0.013458	0.0286232	0.0256472	0.105757	0.0429935	-0.0080311	0.00577455	-0.0082941	0.0513029	0.0176842	-0.0351098
104	0.277813	0.255659	0.248467	0.174783	0.0492694	0.190482	0.164579	0.338151	0.291063	0.204547	0.0347502	0.233221	0.218123	0.0734072	0.182264	0.170626	0.227422	0.0619776	0.158679	0.0696941	0.30965	0.115911	-0.0029856	-0.013546	0.0654094	0.0441964	0.053411	0.0319834	0.0548346	0.0410073	0.0311429	0.0199557	-0.0045215	0.0389116	0.0444131	0.00689793	0.0188377	0.0814521	0.0232245	-0.0052634	0.0487201	0.00550981	0.0706134	0.00615889	-0.009501
105	0.270135	0.265456	0.243022	0.181727	0.0534997	0.20673	0.147639	0.318316	0.284226	0.184554	0.0677593	0.241596	0.202651	0.0937408	0.189545	0.123326	0.231869	0.0947211	0.190923	0.0890157	0.280116	0.106626	0.00050395	-0.0121034	0.0571405	0.0842544	0.0163755	0.00782487	0.0407284	0.0586549	0.0284647	0.0223674	-0.0111869	0.0293929	0.0248843	0.029675	-0.0367887	0.0506525	0.00740334	0.0297875	0.00731742	0.0193658	0.0376271	-0.0174235	-0.0110594
106	0.284998	0.246464	0.228512	0.191595	0.0276499	0.206892	0.162908	0.327374	0.272574	0.187949	0.0741704	0.232512	0.194086	0.066397	0.171547	0.107968	0.241996	0.0894639	0.141739	0.0530867	0.269249	0.11123	-0.031329	0.00263859	0.033879	0.0450023	0.0129516	0.0102736	0.0558956	0.0717129	0.0234745	-0.0128061	0.0135309	0.0456859	0.0279187	0.00860901	-0.0077567	0.0756743	0.0200636	0.00493361	0.0550814	-0.0105783	0.0399834	-0.008681	-0.0052628
107	0.26951	0.238919	0.247338	0.172929	0.0604859	0.211022	0.136821	0.328398	0.277416	0.1901	0.0432175	0.22353	0.209889	0.0678245	0.174995	0.123886	0.249014	0.0720503	0.16487	0.0673003	0.286958	0.118991	0.0354962	-0.005709	0.0407122	0.0735594	0.0135356	0.0252802	0.0472765	0.062028	0.0298366	0.0299495	0.0109775	0.0337775	0.0358993	0.0144992	0.0735812	0.0460184	0.0133457	0.0138879	0.0544205	0.027741	0.035447	-0.0049267	-0.0203935
108	0.284256	0.24068	0.231695	0.180879	0.0485549	0.213827	0.168323	0.302279	0.248348	0.236116	0.0537175	0.222648	0.235057	0.0658387	0.195711	0.125525	0.252855	0.063453	0.153907	0.0521589	0.276015	0.097145	0.0028387	0.00030643	0.0398002	0.0461777	0.00080557	0.0345789	0.0687653	0.0942437	0.0465436	0.0231308	0.00747035	0.0301318	0.0453912	0.0241676	0.064231	0.0818393	0.0443563	-0.0037936	0.0492122	0.0221622	0.0118737	-0.0010435	-0.0418958
109	0.258629	0.237683	0.22633	0.187499	0.0375627	0.215761	0.145679	0.296774	0.286502	0.2232	0.0568647	0.20398	0.215036	0.0719895	0.183215	0.122771	0.255484	0.0704655	0.160393	0.0532698	0.293741	0.0749451	0.021609	0.00728942	0.0633025	0.0693239	-0.0013681	0.0207262	0.0215157	0.0489155	0.0479427	0.020346	0.00674555	0.0385865	0.0380705	0.0267454	0.0594939	0.0444369	0.056595	-0.014131	0.00859653	-0.0029736	-0.0069157	0.0138171	-0.0640548
110	0.263332	0.229328	0.225276	0.179023	0.0362909	0.195011	0.16421	0.318443	0.290457	0.18497	0.0494856	0.215523	0.235916	0.0643418	0.200343	0.119575	0.220627	0.0628005	0.138107	0.0513336	0.27551	0.0883989	0.0407506	0.0323959	0.0667552	0.0599651	-0.0103917	0.0333825	0.0209137	0.0568925	0.0519274	0.00484301	0.0294508	0.0543046	0.0490947	0.0303036	0.0662043	-0.0035626	-0.0127909	-0.0122893	-0.0061606	-0.0353807	-0.0064818	-0.0011154	-0.0721694
111	0.258828	0.228847	0.237639	0.167701	0.0592378	0.204579	0.162024	0.306269	0.284723	0.205698	0.0403117	0.210976	0.207855	0.0804995	0.179532	0.108374	0.239776	0.0453193	0.148154	0.0498029	0.266709	0.0751124	0.00574925	0.0043768	0.0557595	0.0622804	0.00357335	0.0210994	0.0331545	0.0920718	0.0272682	0.0195846	0.0100703	0.0227313	0.018077	0.0296959	0.0574675	0.0238575	-0.0155723	-0.0244319	0.0219556	-0.0036402	0.0243968	-0.0155759	-0.0359937
112	0.260905	0.212441	0.264704	0.180581	0.052237	0.167356	0.137586	0.297656	0.28622	0.180723	0.0406844	0.188249	0.220981	0.0753248	0.18915	0.0879579	0.233405	0.06516	0.128758	0.0579706	0.21839	0.0770619	0.0186198	0.0155988	0.0556078	0.0495512	-0.0071212	0.00308683	0.0189335	0.0787797	0.0188503	-0.0027938	0.0150704	0.0247428	0.0329836	0.0227378	0.0638667	0.0271631	0.0131788	-0.0156839	0.0284726	-0.0033931	0.00645505	-0.0116807	-0.0280194
113	0.220306	0.199336	0.223964	0.175234	0.0369185	0.176144	0.109811	0.274504	0.294737	0.167603	0.0516742	0.178925	0.21608	0.101	0.190115	0.120749	0.259721	0.0559817	0.142746	0.0747642	0.282268	0.0916817	0.0340169	0.00360091	0.0402919	0.0301709	0.0151393	0.0201358	0.031492	0.0851956	0.0195559	0.0261676	0.0264473	0.0434079	0.0160682	0.0439581	0.0873345	0.00645781	0.0282225	-0.0060694	0.0227077	-0.0401443	-0.0023644	0.068731	-0.0469848
114	0.224354	0.19037	0.188463	0.165086	0.0511899	0.163199	0.119786	0.271088	0.29625	0.170919	0.0339999	0.173287	0.212213	0.0804445	0.169532	0.0890267	0.235858	0.0405704	0.134199	0.073387	0.264766	0.080096	0.0215413	-0.0082003	0.0404486	0.0446129	0.00572465	0.0213098	0.0206504	0.0650373	0.00680165	0.027916	0.0157124	0.0399786	0.0156994	0.0337996	0.0357814	-0.0132823	0.0763699	-0.0055879	-0.0246386	-0.0109536	0.00153731	0.0317489	-0.0382922
115	0.221667	0.201392	0.206536	0.179132	0.056251	0.167549	0.113574	0.288924	0.280231	0.173624	0.0406116	0.225409	0.227324	0.0952653	0.173841	0.131955	0.240284	0.0576337	0.118414	0.0644119	0.267832	0.0932614	0.0331275	0.00392691	0.0419786	-0.0017583	0.0149093	0.0486081	0.00012973	0.0396525	0.0151923	0.0118642	0.0273931	0.0431541	0.00791514	-0.000922	0.0881152	-0.0051258	0.00941823	-0.0373472	0.00211103	-0.0264755	0.00513952	0.0446706	-0.0425604
116	0.234349	0.17019	0.210759	0.181068	0.0359084	0.193896	0.112651	0.301406	0.309899	0.162465	0.0528521	0.220016	0.232751	0.119119	0.186868	0.135754	0.212766	0.0618085	0.142175	0.0595118	0.244933	0.10076	0.0201101	0.0135409	0.0482444	-0.0155525	-0.0013057	0.038566	0.018298	0.0313997	0.0207488	-5.113e-05	0.0395076	0.0498019	0.0244222	-0.0092663	0.0528386	0.0170357	0.0217184	-0.0299635	0.05085	-0.0066337	0.00343774	0.0140795	-0.0472495
117	0.235154	0.201361	0.214331	0.193915	0.0575102	0.193493	0.108842	0.289213	0.278719	0.131806	0.0370546	0.202371	0.239053	0.0695725	0.178127	0.134319	0.219457	0.0484397	0.144535	0.053118	0.233165	0.104228	0.0115015	0.0212909	0.0306912	0.00618883	-0.0014298	0.0392565	-0.0058843	0.0439164	-0.0020442	0.00995726	0.0533408	0.0261032	-0.0154204	-0.0100501	0.0466739	-0.0165672	0.037714	-0.0112759	0.00221061	0.00238493	-0.0017072	0.0062235	-0.0210945
118	0.250309	0.176869	0.201719	0.192576	0.0521609	0.164524	0.11403	0.286694	0.288132	0.167167	0.0468826	0.20354	0.247851	0.0823679	0.176009	0.165304	0.215741	0.068361	0.125972	0.0463472	0.256573	0.0942027	0.0405071	-0.0069606	0.0527285	-0.0492351	0.0164414	0.0500688	0.0136932	0.0261882	0.0228063	-0.0171295	0.0240113	0.0302613	-0.0001182	-0.0108767	0.0390318	0.0274458	0.0122902	0.00517752	0.0128756	-0.0259685	0.0001964	0.0133584	-0.0140718
119	0.234749	0.170969	0.207982	0.194066	0.0255009	0.139221	0.110154	0.292409	0.300081	0.180295	0.0404907	0.22189	0.235655	0.058575	0.167951	0.0900847	0.2311	0.0514788	0.128112	0.040796	0.223098	0.106494	0.0555315	0.00074319	0.0625718	-0.030574	0.0210141	0.0404861	-0.016781	0.0545622	0.0145224	-0.005829	0.0406426	0.0103806	0.00356469	-0.0231666	0.0357971	0.00707669	0.0220588	-0.0234698	0.0272217	-0.0373399	-0.0218454	0.0182243	-0.0431916
120	0.242494	0.150474	0.206979	0.193973	0.0436129	0.150102	0.111975	0.280353	0.272181	0.186718	0.0268875	0.223709	0.20982	0.0869576	0.168548	0.14052	0.228097	0.0465938	0.136501	0.0474045	0.22101	0.101566	0.0533005	0.0150796	0.029563	-0.0074086	-0.0019268	0.0168267	-0.017702	0.0341361	0.0235191	0.0165596	0.0237836	0.0307566	-0.011964	-0.0388405	0.0179395	0.0165763	0.0211258	-0.015215	0.0106391	0.00085854	0.0176416	0.0213916	-0.0207517
121	0.225279	0.155442	0.19601	0.1863	0.0295021	0.142746	0.11412	0.281332	0.27944	0.153415	0.0401643	0.192279	0.213949	0.0816697	0.175463	0.122983	0.227927	0.053325	0.121243	0.0490877	0.268175	0.0848568	0.0243878	-0.0202876	0.0102476	0.00997019	0.0174455	-0.0050228	0.0256679	0.00947673	0.0307415	0.0134608	0.0201362	0.0459752	-0.002525	6.1303e-06	0.0394924	0.0542545	0.0498787	-0.0306482	0.0194029	-0.0011397	-0.0330948	-9.361e-05	-0.0458172
122	0.238081	0.166563	0.203391	0.176537	0.0117475	0.173222	0.108124	0.296474	0.31898	0.163571	0.0085598	0.18231	0.232659	0.0954625	0.179148	0.157029	0.241374	0.0292537	0.134348	0.0579636	0.262588	0.09461	0.025826	0.0128307	0.0165645	0.0201672	0.0209168	0.0343167	0.0291494	0.0493261	0.00798264	0.00571062	0.017023	0.0447331	9.167e-05	-0.0051558	0.02921	-0.0170765	0.0350263	0.00048322	0.0233209	-0.0289748	-0.0341159	0.00107863	-0.0641989
123	0.246374	0.17527	0.19019	0.170841	0.00941684	0.153094	0.110465	0.315517	0.290955	0.166747	0.0458647	0.186111	0.221697	0.0999654	0.154436	0.119629	0.206099	0.05476	0.122248	0.0579433	0.239326	0.110522	0.0320856	-0.0102955	0.00590707	-0.0189699	0.029789	0.045224	0.0328185	0.0918502	0.00927482	0.00754779	0.00799363	0.0607589	0.011415	-0.0347812	0.0212281	-0.0018086	-0.0029605	-0.0027308	0.0344221	-0.004456	-0.0218116	-0.00756	-0.0435675
124	0.223885	0.20484	0.218826	0.148049	0.0376474	0.16574	0.111331	0.317647	0.323221	0.156896	0.0190209	0.178481	0.222016	0.104688	0.159924	0.145836	0.224442	0.0463469	0.174672	0.0487743	0.192004	0.106832	0.00860598	-0.0235869	0.0421161	0.0304184	0.0116075	0.0504525	0.0424225	0.0834693	0.0175525	-0.0016129	0.0121164	0.0412295	-0.0062668	-0.0272449	0.0130064	-0.0341325	0.0318393	0.0161433	0.0272298	-0.0196761	-0.0137172	0.00694704	-0.0572298
125	0.232079	0.195497	0.166334	0.1593	0.00630891	0.122532	0.108633	0.307295	0.284282	0.173573	0.0386966	0.197779	0.251112	0.0965616	0.154141	0.0754329	0.226506	0.0493892	0.114451	0.0485346	0.225571	0.109064	0.0408017	0.0044117	0.0408422	0.0258178	0.0244821	0.0479239	0.0570481	0.0607661	0.030996	-0.0200019	0.0262401	0.0483437	0.00802596	-0.0267913	0.0574031	0.0470951	0.0336133	0.0206567	0.0358761	0.02245	-0.0137936	-0.0033768	-0.0137701
126	0.244822	0.194721	0.201571	0.166482	0.0141884	0.155719	0.115983	0.328864	0.277855	0.164586	0.0190695	0.171328	0.197243	0.0939237	0.145971	0.0928027	0.212965	0.0355442	0.154395	0.0538088	0.277413	0.101482	0.0281073	0.00641104	0.0280862	0.00429838	0.0150492	0.035589	0.0521393	0.0107131	0.0276647	0.00316434	0.0290513	0.035012	0.00315128	-0.0296621	0.037394	0.0678517	0.035266	0.00901499	0.0430293	0.0261736	-0.0325651	-0.0047775	-0.039537
127	0.235	0.194746	0.191473	0.200663	0.0126782	0.129654	0.122753	0.286907	0.295732	0.160906	0.034464	0.160827	0.240999	0.0658812	0.155831	0.120435	0.223381	0.0544738	0.130059	0.0615026	0.213736	0.106069	-0.0508632	-0.0146251	0.0220342	0.0191992	0.0174787	0.0395835	0.0569358	0.0141857	0.00045541	0.00567889	0.0260302	0.0276915	0.0194447	-0.0296877	0.0382956	0.0334457	0.0131191	0.0012956	0.0208635	0.0101432	-0.0230144	-0.0118334	-0.0042553
128	0.224113	0.182254	0.162988	0.172636	0.0352066	0.165386	0.129331	0.283521	0.303798	0.18308	0.00736562	0.152166	0.212437	0.0942078	0.156831	0.0989402	0.215429	0.0429131	0.128546	0.0478197	0.256407	0.100408	0.00353493	-0.0301111	0.0383869	0.00541538	0.0360971	0.0188601	0.0701288	-0.0031202	0.015017	-0.0076186	0.020444	0.0471544	0.0531368	-0.0130393	0.0375894	0.0197364	-0.0254836	-0.0090899	0.0556311	-0.0104525	-0.035996	0.0044062	-0.0520912
129	0.236931	0.180368	0.192526	0.197377	0.0413972	0.129309	0.125599	0.272762	0.2816	0.133426	0.0369826	0.157998	0.236383	0.0796158	0.142985	0.105079	0.19675	0.0509703	0.0941146	0.0336769	0.225674	0.099373	-0.0008477	-0.0225588	0.0239029	0.032521	0.0426109	0.0400806	0.0646051	0.0262773	0.0204224	-0.0003975	0.0348048	0.0406977	0.0345491	-0.0011133	-0.0136196	0.0514803	-0.0062934	0.0442362	0.0387719	0.0116469	-0.0275958	0.0136784	-0.0539102
130	0.237882	0.186991	0.177088	0.17773	0.0200129	0.139577	0.137643	0.25671	0.285446	0.160495	0.0384339	0.15951	0.230826	0.0957681	0.134138	0.155322	0.238301	0.0503202	0.133272	0.0620722	0.211867	0.0942568	-0.004416	0.0208965	0.0153725	0.00895872	0.0149361	0.029699	0.070225	0.0426457	-0.0075257	-0.0029909	0.0220277	0.0441135	0.0272742	-0.0154197	0.0112237	0.0918984	0.0096659	0.0190009	0.0216117	-0.0019721	-0.0062575	-0.0041859	-0.033134
131	0.235986	0.174214	0.168365	0.215038	0.0154446	0.151455	0.111415	0.245122	0.311888	0.163275	0.00944374	0.167277	0.216714	0.100003	0.130794	0.104066	0.20572	0.0247435	0.111637	0.0467657	0.22727	0.0632116	-0.0187788	0.0249021	0.0643302	0.0220549	0.0366438	0.0405909	0.0353819	0.0470266	-0.0113468	-0.022051	0.00535727	0.0504998	0.0286269	-0.0223956	-0.0108506	0.130331	0.00824023	0.00944702	0.0157854	-0.0135537	0.00346973	0.0100519	-0.0470232
132	0.220726	0.170007	0.199394	0.194904	0.0307862	0.177948	0.138615	0.259374	0.285805	0.189456	-0.012561	0.168267	0.18776	0.0958867	0.118294	0.132051	0.205359	0.0100399	0.153367	0.0630504	0.254857	0.0870199	-0.0014418	0.0251703	0.0438018	0.0442521	0.00834215	0.03448	0.0462667	0.0572097	0.00645423	-0.0085863	-0.0100495	0.0370099	0.0398791	-0.0340782	-0.0080553	0.0761617	0.0436392	-0.0018964	0.00467146	-0.0289592	0.002057	0.00281033	-0.0379412
133	0.213766	0.176009	0.20295	0.17919	0.0222539	0.193829	0.120832	0.256164	0.297142	0.155955	-0.003456	0.166278	0.202326	0.0678081	0.151366	0.111407	0.207617	0.0201688	0.135834	0.0499716	0.203963	0.0778745	0.0142134	0.0240436	0.0299688	0.00809671	0.0211502	0.0322169	0.0372937	0.0646137	0.00196086	-0.0190066	0.00677757	0.0514316	0.0301607	-0.0151469	0.0123903	0.0393223	0.0265478	-0.0067972	0.00824524	-0.0300426	-0.0120044	0.011525	-0.0281222
134	0.219928	0.20894	0.178423	0.177149	0.0236939	0.15945	0.125753	0.245056	0.283936	0.158559	-0.000718608	0.198085	0.195185	0.087591	0.124247	0.0538542	0.218619	0.0239333	0.150665	0.0832428	0.230613	0.0811716	0.0236966	0.0200982	0.0557043	0.0270396	-0.0007865	0.0270485	0.0519061	0.0608608	0.00400832	-0.0111492	0.0306953	0.0413109	0.0596469	-0.0301095	0.0247265	2.3345e-05	0.0515757	-0.0092846	-0.0059505	-0.0240444	-0.0172265	0.012024	-0.0536569
135	0.210562	0.202013	0.177598	0.177631	0.0310037	0.145036	0.153986	0.245719	0.276311	0.131819	0.00900983	0.191179	0.212852	0.0784558	0.128311	0.0857271	0.225254	0.0329271	0.109744	0.0715254	0.212883	0.0950698	0.00113353	0.0119414	0.0309574	0.0201003	0.00643507	0.0222001	0.0565959	0.0379427	-0.0109443	-0.0125656	0.0127206	0.0215713	0.0360737	-0.0166404	0.0433732	0.0544478	0.0398056	0.0179819	-0.0079407	-0.0537358	-0.0097494	0.00911647	-0.0603573
136	0.234981	0.187939	0.184035	0.163136	0.0651167	0.154676	0.12737	0.229286	0.282985	0.157485	0.00892779	0.157323	0.208084	0.0778829	0.126849	0.0968888	0.213899	0.0273666	0.112448	0.0447099	0.188389	0.0671662	0.00499419	-0.0001374	0.0346359	0.0107058	0.0378692	0.0488706	0.054717	0.029396	-0.0063685	-0.0106456	0.0264133	0.0242456	0.0450267	-0.0468877	0.0128109	-0.0213885	0.0378579	0.0195707	-0.0230392	-0.0590822	0.00575064	0.0102273	-0.0549158
137	0.209616	0.19505	0.162729	0.18227	0.0404264	0.142679	0.154881	0.221906	0.252097	0.129237	0.0274406	0.163709	0.201203	0.0822279	0.112248	0.111762	0.213228	0.0348397	0.0818671	0.0529438	0.206348	0.0836595	0.0244352	0.00747282	0.0470127	0.0536839	0.0294293	0.0305825	0.0587144	0.048404	-0.0205417	0.00409168	0.0284204	0.043297	0.0351875	-0.0583176	0.0178772	0.0428425	0.0359271	0.0199739	0.00801248	-0.0112554	0.00505162	-0.0046693	-0.0278997
138	0.215769	0.195047	0.16987	0.180509	0.0105697	0.166556	0.15701	0.238325	0.26167	0.150581	0.0240411	0.192263	0.2338	0.0602475	0.125291	0.105074	0.21886	0.0245261	0.0814329	0.0522545	0.225462	0.0982666	0.022996	-0.0119882	0.0641189	0.03481	0.0199421	0.0392379	0.0424296	0.0515176	-0.0247324	-0.0017657	0.0300857	0.0636272	0.0481818	-0.0251447	0.033503	0.00829626	0.0244277	0.0263078	-0.0036979	-0.0219132	0.0174661	0.00577757	-0.030958
139	0.190501	0.204936	0.165372	0.185041	0.0382789	0.152498	0.161727	0.245847	0.285022	0.164034	0.0121411	0.166957	0.210851	0.0909756	0.120651	0.0873972	0.210079	0.0343002	0.114357	0.0743935	0.203137	0.10623	0.0539294	0.00047193	0.0228473	0.0509442	0.00535036	0.0372042	0.0559501	0.0397413	-0.0177259	-0.0074227	0.0174119	0.0708772	0.0402354	-0.0370134	0.0164662	-0.0258838	0.027653	0.0125671	0.022771	-0.0379139	-0.0242572	-0.0083237	-0.0780681
140	0.201565	0.19253	0.16095	0.172108	-0.00867489	0.138148	0.162737	0.268187	0.29008	0.148985	0.0392896	0.173354	0.222564	0.0893824	0.138382	0.0940078	0.198261	0.0420696	0.142141	0.0437546	0.22007	0.100701	0.0600929	-0.0070729	0.0279675	0.0748866	0.0120128	0.0325935	0.0401823	0.045017	-0.0236487	0.00788374	-0.0010216	0.0646327	0.0403158	-0.061641	0.0304432	-0.059805	-0.0066491	0.0498512	-0.0156233	-0.0233343	-0.0206912	-0.0179272	-0.0561661
141	0.170406	0.201851	0.169125	0.172858	0.042621	0.103803	0.16417	0.281612	0.255835	0.158733	0.0458807	0.151002	0.210818	0.0752574	0.125408	0.0947374	0.218961	0.03254	0.122372	0.0494217	0.231489	0.109591	0.051871	-0.0311878	0.026281	0.0818209	0.00514193	0.0301842	0.030571	0.0366728	-0.033006	-0.0134166	0.0185797	0.0624705	0.0407816	-0.0405176	0.0288477	0.0080557	-0.0134996	0.0366785	-0.0299616	-0.0585028	-0.0224727	-0.0172746	-0.0399673
142	0.187599	0.208086	0.16165	0.163924	0.0570473	0.147763	0.185851	0.266114	0.25179	0.144146	0.030908	0.175781	0.213327	0.0903398	0.123663	0.104197	0.231044	0.0313201	0.103211	0.0478844	0.191655	0.082796	0.0653163	-0.0131498	0.00642351	0.0271615	-0.0029958	0.0253284	0.0339247	0.0577141	-0.0348534	-0.0290114	0.0134336	0.0646206	0.0483792	-0.011506	0.00047386	0.00935376	-0.0112433	0.00262655	0.0184992	-0.0349254	-0.0361774	-0.0302211	-0.0058916
143	0.18793	0.199706	0.190896	0.165268	0.0295679	0.138256	0.187682	0.247496	0.282524	0.159151	0.0245204	0.181681	0.209285	0.0897925	0.147508	0.130121	0.205288	0.0161056	0.115803	0.0301621	0.224223	0.0907465	0.058819	-0.0293855	-0.0046087	0.029425	-0.0242538	0.0169143	0.0495697	0.0436941	0.0050799	-0.0116795	0.0363381	0.0604404	0.0579186	-0.0270807	0.0349213	-0.0244594	0.00542056	0.0176495	-0.0012092	-0.0432779	-0.0335849	-0.0151134	-0.0374106
144	0.18056	0.18615	0.168465	0.184005	0.0475827	0.140414	0.179027	0.254775	0.262696	0.165981	0.000416329	0.169748	0.223042	0.0616288	0.115728	0.100036	0.211396	0.0385819	0.0924363	0.0523673	0.194174	0.0977896	0.0552451	0.00393227	0.0111657	0.0382111	-0.0146294	0.00641585	0.0195439	0.0832179	0.00349629	-0.0093625	0.0170879	0.0533913	0.0787478	-0.036658	0.0172266	0.016215	0.0112775	0.028121	0.0155559	-0.06796	-0.0156097	-0.0027627	-0.0533556
145	0.192227	0.195981	0.178194	0.158396	0.00815663	0.107074	0.166679	0.260771	0.277528	0.159003	0.0193744	0.157922	0.208318	0.034015	0.119908	0.0780821	0.213684	0.0397671	0.123799	0.034019	0.231859	0.0958417	0.0486721	-0.0041336	0.00677698	0.0417876	-0.0033008	0.0211663	0.0490854	0.0245812	0.00213218	-0.0215973	0.00755408	0.0684725	0.048383	-0.027774	0.0646713	0.0218845	0.012953	0.0572543	-0.0218456	-0.0391862	-0.0169996	-0.0099275	-0.0563644
146	0.192927	0.216578	0.187263	0.156437	0.0558464	0.125511	0.175541	0.249138	0.273857	0.181038	0.00475879	0.164798	0.190835	0.0720067	0.153055	0.102528	0.214377	0.0160174	0.10389	0.0565269	0.214525	0.0968912	0.0566407	-0.0134393	0.0195266	0.0214228	0.00952777	0.0156945	0.0278972	0.0771565	0.00678094	-0.005711	0.00822862	0.0840228	0.0388823	0.00229951	0.0396913	0.0296205	0.017996	0.0127322	-0.0719885	-0.0248751	0.00376448	-0.0127625	-0.0210676
147	0.19203	0.192083	0.175201	0.178964	0.0592308	0.13916	0.16527	0.240909	0.262741	0.157843	-0.00977432	0.171824	0.190932	0.0488962	0.130872	0.10494	0.211857	0.00514784	0.120359	0.0433068	0.255948	0.0957073	0.0310316	-0.0281252	0.00028794	0.0401959	-0.006289	0.0165062	0.0368622	0.0518269	-0.0073837	-0.0282351	0.0155653	0.0868714	0.0434241	-0.0143004	0.0203061	0.033954	0.0165711	0.0404947	-0.0258253	-0.0026236	-0.0133823	0.0025175	-0.0570139
148	0.199365	0.207442	0.2043	0.159531	0.0370501	0.139632	0.14543	0.236414	0.250532	0.170038	0.0250598	0.17912	0.201886	0.0629244	0.10582	0.121603	0.17113	0.0365085	0.0909376	0.0368455	0.2154	0.0921094	0.0196989	-0.0337872	0.0168858	-0.0034041	-0.0043805	0.0157519	0.0328377	0.0716696	-0.0148039	-0.0218627	0.025726	0.0781882	0.0494552	-0.028873	0.0319601	-0.0153223	-0.0061197	0.0248304	-0.0189229	-0.0552975	-0.0079738	0.00760768	0.0001358
149	0.190743	0.186335	0.176442	0.154505	0.0247648	0.171279	0.165808	0.243554	0.292116	0.142995	0.0212658	0.150841	0.187148	0.0681012	0.11774	0.0828987	0.212225	0.0261614	0.131875	0.0306986	0.215604	0.0736196	0.0263403	-0.0456701	0.0154223	0.00864667	-0.0222967	0.0385144	0.0167747	0.0497987	0.0363228	-0.0185209	0.00880978	0.059076	0.0543721	-0.0090822	0.0389937	-0.0446986	0.0072518	0.0221249	-0.0388886	0.00875642	-0.0127846	-0.0074719	-0.0238209
150	0.192008	0.179696	0.199942	0.147404	0.0511392	0.159675	0.142523	0.241129	0.270433	0.174852	0.049465	0.175753	0.17592	0.0701969	0.109006	0.088148	0.200942	0.0687049	0.106158	0.0643506	0.184758	0.0720375	-0.005112	-0.039297	-0.0174355	-0.0219293	-0.0152821	0.0334747	0.0160333	0.0435059	0.0173171	-0.0175747	0.0155767	0.0596302	0.0775725	-0.0126101	0.00768745	-0.0098818	0.0011314	0.0605939	-0.03026	-0.0235625	-0.0247198	0.0106043	-0.0075068
151	0.21413	0.182793	0.175914	0.134267	0.0153772	0.174879	0.158581	0.234309	0.255153	0.160644	0.0322812	0.16811	0.164135	0.0457629	0.120706	0.0381241	0.196281	0.0391589	0.100397	0.033286	0.216464	0.101914	-0.0059558	-0.0771529	0.00382278	-0.0076925	-0.0200632	0.0141327	0.0269201	0.0382345	-0.0022468	-0.0089629	-0.0004813	0.0552433	0.0487414	-0.0016616	0.0366901	-0.0753226	-0.00919	0.0249568	-0.0249005	-0.0309829	-0.0036054	-0.0044771	-0.0050129
152	0.222509	0.1991	0.178484	0.138648	0.0407594	0.213838	0.152658	0.23616	0.239744	0.167966	0.0335096	0.160352	0.166798	0.0489173	0.119907	0.102646	0.161991	0.0392584	0.0935705	0.0365102	0.192743	0.0917419	-0.0079668	-0.0130526	-0.0138573	-0.0485806	-0.0042866	0.0214791	0.00434753	0.0187441	-0.0134969	-0.0165279	0.0124869	0.0637556	0.050372	-0.0190844	0.0147507	-0.0685178	0.0101911	0.0407546	0.00449319	-0.0353842	-0.0115347	0.0111672	-0.0253902
153	0.210013	0.163762	0.188836	0.148123	0.0279185	0.201586	0.153614	0.226648	0.266222	0.144556	0.0495749	0.148828	0.183195	0.0559739	0.120067	0.0578698	0.204268	0.0578602	0.0999172	0.0373147	0.205311	0.085565	-0.0138224	0.00732564	0.051832	0.0045985	0.00488879	-0.0001322	0.0328819	0.0341524	0.00561681	-0.006085	0.0183646	0.0526122	0.0242451	-0.0455109	0.0190352	-0.0415362	0.0392429	0.0353403	-0.0456876	-0.026432	-0.0182085	0.0182802	-0.0083028
154	0.210353	0.15972	0.185315	0.1504	0.0266731	0.186604	0.173183	0.216617	0.259067	0.138752	0.0377788	0.173933	0.169758	0.0409462	0.123085	0.0677908	0.176887	0.0471734	0.111395	0.0316807	0.206082	0.0931188	-0.0116541	-0.0008263	0.0375874	0.00316519	0.0129912	0.0256214	0.0146433	0.0274244	0.00830195	0.00629206	0.0033916	0.0699002	0.0192856	-0.0321598	0.0343744	0.0311052	0.0141983	0.0409101	-0.0590331	0.00628218	-0.0026124	-0.0096222	-0.0166976
155	0.226296	0.180494	0.164126	0.167415	0.012803	0.18416	0.17115	0.241053	0.30053	0.146506	0.0486663	0.173984	0.184035	0.0261782	0.119825	0.0377546	0.190687	0.0420145	0.0975112	0.00758075	0.174495	0.106198	0.0042434	-0.0190712	0.0303159	0.0311079	0.0258369	0.0159999	0.00203988	0.0557872	-0.0223125	-0.0253825	-0.0169963	0.0485779	0.0445967	0.00094796	0.00883575	-0.0414922	0.041315	0.0143191	-0.0621581	-0.0124833	0.00968837	-0.0123953	0.0174759
156	0.215968	0.186632	0.174436	0.156902	0.0378863	0.165766	0.16795	0.249795	0.27172	0.149671	0.0378918	0.154331	0.171702	0.025507	0.104911	0.0622831	0.193308	0.0431338	0.122422	0.00626942	0.168315	0.0792837	-0.006822	-0.0133493	0.035059	-0.0036741	0.02784	0.0187076	0.0402475	0.0326687	0.00592113	-0.013213	-0.0366346	0.0693986	0.0542682	0.00741159	0.0197295	-0.0585765	0.02469	0.0394276	-0.0687019	-0.0086797	-0.0099367	0.0237743	0.0202417
157	0.217078	0.15417	0.200998	0.15617	0.049448	0.170016	0.163035	0.272792	0.308082	0.151102	0.0324039	0.171974	0.167766	0.0469506	0.108219	0.0393901	0.17467	0.0483409	0.137496	0.0217728	0.13766	0.0997161	0.0132905	-0.0275853	0.0308761	-0.0084735	0.0271219	0.00112911	0.0153138	0.0494238	0.00579684	-0.0108571	-0.0613655	0.0787984	0.0497081	0.00231112	0.0373565	0.0591818	0.0237946	0.0225449	-0.0471962	0.00092432	-0.0024381	0.0106764	0.00971491
158	0.201191	0.14255	0.187432	0.142649	0.024632	0.166476	0.173518	0.279962	0.284645	0.156646	0.044107	0.169711	0.17058	0.0253352	0.105113	0.0260049	0.148597	0.0457297	0.12388	0.0129709	0.1882	0.0898011	0.0373032	-0.033152	0.0351807	-0.0133484	0.0377995	0.00496293	0.0165109	0.0262991	0.0113759	0.00714549	-0.0345732	0.0524485	0.040396	0.0246275	0.0417402	-0.0087795	0.0217108	0.0397711	-0.0319932	0.056581	-0.0132877	-0.0041008	-0.0191035
159	0.191666	0.170786	0.184247	0.146582	0.0451434	0.154114	0.198872	0.254802	0.297756	0.146332	0.00537285	0.189696	0.172401	0.0586924	0.10062	0.101239	0.185881	0.0221215	0.119021	0.03633	0.191313	0.105149	0.0251112	-0.0039555	0.00574682	-0.0104867	0.0273369	0.00168457	0.00582098	0.0433029	0.00232719	0.00524392	-0.0571675	0.0691983	0.0248629	0.0179414	0.0520218	0.00690638	0.0386529	0.0416672	-0.0281589	0.0270325	0.00456677	0.00446031	-0.0272748
160	0.188119	0.175307	0.152613	0.131294	0.0366584	0.179225	0.153148	0.254614	0.289734	0.15952	0.0079675	0.156451	0.137823	0.0387802	0.116437	0.0660479	0.164739	0.0175605	0.148113	0.0316122	0.166539	0.109586	0.051347	-0.0146335	0.0166869	0.0233093	0.0132498	-0.0208574	-0.0013739	0.052959	-0.0081414	-0.0032188	-0.0666364	0.0703383	0.0398056	0.00856627	0.0248359	0.0301236	0.0443063	0.0304932	-0.021987	0.0458136	0.0117311	0.0296648	-0.0139054
161	0.182285	0.156745	0.144517	0.153297	0.0600336	0.158178	0.177112	0.253111	0.280929	0.16467	0.0266564	0.153289	0.176137	0.0389058	0.105616	0.0396194	0.172715	0.0328075	0.129577	0.0200526	0.136539	0.118178	0.0255069	-0.0477347	0.022185	0.0117629	-0.0124323	0.00406174	-0.0016528	0.0311991	-0.0107078	-0.0169959	-0.0520268	0.0704656	0.0103817	0.021639	0.0528669	0.0447257	0.0261945	0.0299068	-0.033455	-0.0006447	0.0375169	0.00918811	0.00182887
162	0.174378	0.146359	0.14901	0.164862	0.0180389	0.188841	0.166583	0.247516	0.307325	0.168656	0.0262869	0.146842	0.155701	0.0458208	0.0907597	0.0632632	0.166017	0.0405164	0.114847	0.0305098	0.120062	0.115812	-0.0122826	-0.0287752	-0.0032771	-0.0451355	0.0132408	-0.0162192	-0.0199184	0.0567035	-0.0006053	-0.0101208	-0.0546373	0.0623796	0.0316857	0.0243119	0.0603604	0.0385873	0.0159837	0.0288966	-0.0359316	0.0308277	0.00867602	0.0111746	-0.0323349
163	0.204695	0.15555	0.170739	0.163669	0.00141247	0.178544	0.186825	0.253835	0.259765	0.16324	0.0178827	0.180745	0.152717	0.0497144	0.0889608	0.0937535	0.208556	0.0290391	0.120263	0.0216519	0.151985	0.0957414	0.0552719	-0.0154112	0.0147659	-0.043461	0.00594147	-0.0179438	0.00075879	0.0636258	-0.004355	0.00182649	-0.0422509	0.0577988	0.036937	0.0213656	0.0308659	0.0399762	0.00820652	0.0238253	-0.040083	0.0219899	0.00817966	-0.0036654	0.03623
164	0.205251	0.152518	0.155184	0.162281	0.0223286	0.195746	0.151648	0.273377	0.269108	0.18372	0.0342517	0.141131	0.14801	0.0412849	0.0733802	0.076088	0.184765	0.018511	0.137103	-0.00559344	0.0706161	0.10642	0.040901	-0.0105976	0.0278391	0.00565668	0.00399046	-0.0081379	0.00704376	0.0826091	-0.0289488	0.00414822	-0.0168467	0.0419403	-0.0044682	0.0234535	0.058237	-0.0476812	0.0151682	0.00826411	-0.0511189	-0.005538	0.00537113	-0.0117174	0.0109099
165	0.212257	0.151506	0.1595	0.171128	0.0298498	0.185596	0.160592	0.268481	0.252309	0.184505	0.0313226	0.138884	0.162116	0.0446185	0.087214	0.0903145	0.221787	0.0319939	0.124041	0.0206527	0.0976426	0.10463	0.0634939	0.0259521	0.0149386	0.0014842	-0.0183632	0.0091166	-0.0300376	0.0801729	-0.0162694	0.00428564	-0.049021	0.0478186	-0.0001163	-0.0073001	0.0419533	0.0379478	-0.0046684	0.0237629	-0.0289465	-0.0013825	-0.0044258	-0.0291573	-0.0077449
166	0.199469	0.152772	0.156184	0.165303	0.0276884	0.16114	0.155292	0.255069	0.272887	0.175457	0.0148687	0.159641	0.130652	0.0515258	0.0878099	0.096586	0.178436	0.0203041	0.118256	0.0202884	0.10402	0.105974	0.0572849	0.0120953	0.00061795	0.030798	-0.0224806	-0.019393	0.0024685	0.0482847	-0.0046821	0.00595515	-0.0116965	0.0478369	0.00454844	0.0117134	0.0539584	0.0291312	-0.0180557	0.0382732	-0.0433248	-0.0392356	0.00299831	0.00175353	0.0212551
167	0.200493	0.152458	0.128848	0.168331	0.0111652	0.179692	0.168263	0.272633	0.258293	0.168138	0.0135513	0.146492	0.163086	0.0430255	0.0946404	0.0448293	0.160631	0.0383583	0.131699	0.0369438	0.10338	0.105711	0.0620203	0.00084527	-0.0037181	-0.0015589	0.0126149	-0.0088428	-0.0274013	0.0888451	0.00126681	0.00292359	-0.0024071	0.0469957	0.00808644	-0.0275999	0.0389116	-0.0086546	-0.0220253	0.00891766	-0.0090525	-0.0084805	-0.0054381	-0.0256473	0.00902149
168	0.196318	0.158468	0.144666	0.154141	0.0225722	0.179402	0.129061	0.25742	0.244155	0.216434	0.0466373	0.157123	0.148333	0.0290904	0.115539	0.0811694	0.17138	0.0398573	0.126967	0.0502946	0.0887174	0.124779	0.062941	0.00943131	0.0166668	-0.0142013	0.0120836	-0.0015313	-0.0233924	0.0874324	-0.0187062	0.00425759	0.0126916	0.0641062	0.00407699	-0.0178107	0.0284191	-0.087047	0.0207765	-0.0131999	-0.0424243	0.0385754	0.00318922	-0.0181389	-0.0138119
169	0.208933	0.160504	0.138834	0.137848	0.00855784	0.144805	0.160473	0.249815	0.260003	0.207492	0.019993	0.144838	0.134487	0.0634583	0.113225	0.0756623	0.175428	0.0165543	0.113864	0.0425745	0.114124	0.113134	0.0515882	-0.0034531	0.0200585	-0.04947	0.013763	-0.0112983	-0.0102043	0.0645161	-0.0121667	-0.0158991	0.0179513	0.0451092	0.0007236	0.0183119	0.0701323	-0.0381762	0.0275457	-0.0298038	-0.0064919	0.032633	0.0240887	0.00655908	-0.0047238
170	0.212101	0.16452	0.140291	0.14675	0.0202908	0.15441	0.162958	0.244095	0.252769	0.188296	0.0318215	0.140645	0.130049	0.0502125	0.120502	0.0498008	0.194135	0.0378012	0.136507	0.0460279	0.127064	0.119137	0.0343057	-0.0361205	0.025089	-0.018737	0.0116829	0.00405319	-0.0099239	0.0767567	-0.0125782	-0.0165653	0.0142454	0.0466329	0.0057044	-0.0050262	0.0283989	-0.124472	0.0276848	0.00023427	-0.0309536	0.031816	-0.0122631	-0.0027098	-0.0072215
171	0.208299	0.157461	0.132237	0.152563	0.0339568	0.197919	0.16763	0.223399	0.260755	0.16815	0.0464022	0.135619	0.152713	0.0345793	0.109516	0.0208778	0.175889	0.0439674	0.134344	0.0472016	0.104006	0.121952	0.075754	0.018636	0.0291285	-0.0334724	-0.0151851	3.1612e-05	0.00079062	0.0632116	-0.0167733	-0.0001553	0.00048206	0.051571	0.00252252	-0.0107963	0.0167643	-0.0625979	0.013653	0.00074709	-0.0075344	0.0142045	-0.0236676	-0.0167597	0.0273333
172	0.217096	0.165989	0.1157	0.158774	0.0186243	0.165585	0.180035	0.231478	0.255396	0.168566	0.027828	0.135354	0.136164	0.0282321	0.131969	0.0134291	0.204217	0.0383415	0.149923	0.0387605	0.0917498	0.125789	0.0346509	0.00636657	0.0110596	0.00625234	0.012178	0.0400255	-0.00798	0.0603276	-0.0116141	0.00689764	0.018971	0.0465058	0.00883449	-0.0047408	0.053592	-0.0533635	0.00525955	-0.0199276	-0.0310967	0.0113916	-0.0221565	-0.0010798	-0.0099152
173	0.197524	0.154548	0.122541	0.135503	0.0416183	0.144876	0.187804	0.240338	0.238695	0.194916	0.0486431	0.127192	0.120557	0.0567224	0.141798	0.0549968	0.180317	0.0607071	0.119566	0.0418857	0.105148	0.113913	0.0460149	-0.0231905	0.0254181	-0.0288381	0.0114811	0.0154102	-0.0355744	0.0661262	-0.0123345	-0.0062547	0.00905666	0.0507809	0.0226314	-0.025461	0.0483814	0.0341132	-0.0128162	0.00325649	-0.0305723	0.00581072	-0.0408215	-0.017183	0.00648358
174	0.187643	0.15253	0.130033	0.149361	0.0305274	0.137912	0.187364	0.218757	0.240281	0.186211	0.0468266	0.111615	0.14369	0.0392639	0.123824	0.0918146	0.172002	0.0541889	0.164732	0.034711	0.123039	0.124936	0.0195598	-0.0264189	0.0180959	-0.0101196	0.0245147	0.0361363	-0.0272623	0.0626385	-0.0208616	0.00179696	0.0187246	0.03911	0.0121814	-0.0152371	0.0489491	-0.107122	0.0175915	-0.0005917	-0.0311051	-0.0007809	-0.0041538	0.00732367	-0.0069703
175	0.210728	0.131653	0.109789	0.126554	0.0130208	0.139759	0.165868	0.208946	0.240918	0.183338	0.0272795	0.143904	0.119491	0.068216	0.136909	0.0583022	0.208628	0.0344771	0.138939	0.0441584	0.150194	0.1202	0.0400263	-0.004491	-0.0092821	-0.0147565	0.0229207	0.0241873	-0.0105935	0.0639753	-0.0281439	-0.0038676	0.0151164	0.0402841	0.0304638	-0.0138335	0.0327216	-0.0515511	0.0207105	-0.0336153	0.0242895	-0.0178197	0.00293217	-0.0029681	0.0272149
176	0.222395	0.144613	0.128951	0.134101	0.0312758	0.148753	0.190003	0.191044	0.243115	0.183775	0.0452732	0.13276	0.139835	0.0388946	0.147404	0.056812	0.156238	0.0321978	0.115894	0.0480718	0.106326	0.120073	0.0239588	-0.0190002	-0.0132613	-0.0110203	-0.0020692	0.0236712	0.0112834	0.0616701	-0.0360735	0.00128251	0.0201117	0.0300666	0.0141735	-0.00661	0.0532139	-0.0816503	0.0203297	-0.0251031	0.0471097	-0.0376915	-0.007537	0.0227476	-0.0074574
177	0.216168	0.157205	0.123563	0.115788	0.0569348	0.127802	0.17934	0.186695	0.265627	0.18104	0.0509447	0.142527	0.138116	0.0414842	0.131135	0.0615851	0.186171	0.0415951	0.151334	0.0869689	0.0843707	0.119327	0.0223533	0.0194552	0.00636229	-0.0036418	0.00393006	0.0445441	-0.0240751	0.0874115	-0.0395517	-0.0088054	0.0161474	0.038672	0.0307644	0.0028541	0.0214597	-0.0393618	0.0182847	-0.0240679	0.00452391	-0.0016967	-0.0181856	0.0355439	-0.0446503
178	0.21436	0.161303	0.125314	0.11763	0.0352104	0.125543	0.184405	0.198753	0.278403	0.183978	0.053512	0.174828	0.132824	0.0459055	0.142795	0.0650896	0.170377	0.0340272	0.12214	0.0622566	0.106953	0.11326	0.0327142	0.0262081	-0.0311314	-0.0138652	-0.0083746	0.0528622	0.0191011	0.06895	-0.0356168	-0.0071593	0.00162105	0.0129859	0.0185928	-0.0016632	-0.0022261	-0.0282971	0.00864716	-0.0386908	-0.0153277	-0.0386149	-0.0017983	0.025634	-0.0453369
179	0.194435	0.163651	0.119659	0.134503	0.0441573	0.133579	0.176084	0.18784	0.255257	0.149206	0.0261359	0.172734	0.136089	0.0423971	0.125539	0.0816788	0.18733	0.0410233	0.137585	0.0684923	0.100381	0.113099	-0.0132756	0.0278837	-0.0112162	-0.0400378	0.0245659	0.0433501	-0.0156167	0.0623235	-0.0454541	-0.0280347	0.020974	0.0134491	0.0182343	-0.0098275	0.02523	-0.0873296	0.0170397	-0.0256456	-0.0074613	-0.0152522	0.0041751	0.0096128	-0.0514773
180	0.216792	0.154935	0.12008	0.143438	0.0720109	0.129454	0.16657	0.212267	0.24548	0.197974	0.0238307	0.211748	0.166164	0.0442928	0.114742	0.0435643	0.177053	0.0318634	0.133215	0.0340422	0.0894428	0.104801	0.0111644	0.0119939	-0.0100497	-0.0331491	-0.0258084	0.0223131	-0.0029874	0.0426712	-0.0303485	-0.0127028	0.0137992	0.0290631	0.0212391	-0.0369875	-0.0206631	-0.103113	0.0282926	-0.0514242	0.00539615	-0.017877	-0.0283258	0.00189577	-0.0201666
181	0.208883	0.148629	0.125255	0.134202	0.0543238	0.138414	0.156551	0.216273	0.266957	0.157217	0.0557364	0.219568	0.150369	0.021695	0.115502	0.0183652	0.165951	0.0532728	0.126632	0.0600435	0.11161	0.11399	-0.0121741	0.0005695	-0.0198969	-0.0268352	0.00711092	0.0392833	-0.0105546	0.0228726	-0.0509183	-0.0123295	-0.0126313	0.0136317	0.0245422	-0.032958	-0.016714	-0.0547336	0.00455337	-0.0317694	-0.0151807	-0.0207925	-0.0242353	0.0145203	-0.0219122
182	0.22259	0.138615	0.130509	0.133759	0.0402786	0.116911	0.159865	0.183317	0.287715	0.135828	0.020052	0.191577	0.150997	0.00871394	0.108613	0.0735121	0.197805	0.0278457	0.131238	0.0372722	0.0727649	0.124251	0.00287111	0.0249627	-0.0254882	-0.067696	0.00447548	0.0247467	-0.0119439	0.0127755	-0.0355325	-0.0069966	-0.0220955	0.0154656	0.0451604	-0.0665951	0.0466588	-0.049264	0.00870402	-0.0137644	-0.0343545	0.00730173	-0.0387829	0.0257424	0.0122868
183	0.20764	0.145856	0.121361	0.145934	0.0799613	0.109711	0.150587	0.19891	0.25281	0.145844	0.0681837	0.218726	0.158204	0.0154575	0.115247	0.0509103	0.166138	0.0581324	0.139115	0.0225822	0.0889158	0.123343	-0.0095629	0.0233124	-0.0402375	-0.0315686	-0.0220991	0.0187002	0.0126126	-0.0002548	-0.0216101	-0.026509	-0.0282624	0.0265047	0.0369932	-0.0446599	0.064661	-0.0482537	0.012216	-0.0093387	-0.0408463	-0.0012556	0.00708565	0.0177681	-0.0187188
184	0.21825	0.153242	0.150013	0.157819	0.0600922	0.109951	0.153256	0.185196	0.266752	0.162754	0.0220348	0.21016	0.123947	0.0059061	0.137987	0.0326755	0.162445	0.0101697	0.123116	0.0141322	0.115318	0.131673	0.0168821	-0.0006068	0.0193654	-0.054534	0.00877952	0.0121984	-0.0171407	0.0136257	-0.0193533	-0.0258673	-0.0348415	0.0236715	0.0355039	-0.0543632	-0.000551	-0.0875531	0.0180147	-0.0181899	-0.0369381	0.0174574	-0.0157979	0.0106926	0.0151735
185	0.230101	0.143965	0.158601	0.150369	0.0319745	0.0919331	0.138507	0.198991	0.279091	0.152435	-0.000696377	0.186273	0.136898	0.0136768	0.139974	0.0118179	0.162888	0.0145686	0.121394	0.031382	0.0940187	0.125964	0.00534086	0.0301231	-0.0097387	-0.0533323	0.00246396	0.0186637	-0.0007698	0.00391062	-0.0335533	-0.0237038	-0.0109114	0.0426531	0.0212705	-0.0385635	-0.0004136	-0.005629	0.00703117	-0.0146274	-0.0463699	0.0170217	-0.0071534	0.00455508	0.0143675
186	0.222264	0.124183	0.180741	0.162715	0.0188398	0.0925223	0.177915	0.21355	0.259096	0.147013	0.0212184	0.195191	0.122742	0.0053505	0.136295	0.0182075	0.160833	0.0341734	0.124885	0.0337501	0.0800034	0.112247	0.0242309	0.048412	-0.0042843	-0.0510576	0.0193651	0.0348423	-0.0016143	0.00944562	-0.0170644	-0.0423251	-0.0400871	0.0280931	0.042497	-0.0599484	0.0245741	-0.0235725	0.0825005	-0.0236444	-0.0260689	0.0219872	-0.0282878	0.0245016	-0.0204408
187	0.213093	0.132488	0.154302	0.171555	0.0531994	0.0979368	0.150289	0.193311	0.237864	0.165449	0.0465119	0.179955	0.160541	-0.0167221	0.10815	0.00594722	0.172042	0.0512182	0.134256	0.0486772	0.0879931	0.116178	0.00326981	0.022068	0.0054964	-0.030318	0.0280911	0.0358142	-0.0151561	8.5874e-05	-0.0066091	-0.0394012	0.0125184	0.0437456	0.0275127	-0.0835507	0.0325117	-0.0483748	0.063188	-0.0181625	-0.0588125	-0.0011643	-0.0165146	0.0393147	0.0345399
188	0.187455	0.100797	0.158357	0.171246	0.0507438	0.12073	0.15249	0.213296	0.272164	0.144459	0.025611	0.199547	0.140625	-0.0354707	0.118673	0.0531554	0.161676	0.0214409	0.12773	0.0363605	0.13086	0.101367	0.0350899	0.00482354	-0.0056465	-0.0427035	-0.0037437	0.039281	-0.0128122	0.0108577	-0.0358375	-0.0114388	0.00460911	0.0475372	0.013248	-0.0647302	0.0667422	-0.0524388	0.0528453	-0.0144712	-0.0531166	-0.0119739	-0.0214884	0.0261717	0.0528354
189	0.183422	0.108773	0.156976	0.169361	0.0564392	0.113099	0.14025	0.246557	0.283534	0.164627	0.0304675	0.196963	0.147387	-0.0261923	0.122047	0.0200599	0.154742	0.0376943	0.13368	0.0638972	0.125714	0.115551	0.0104758	0.0362621	-0.0069211	-0.0141877	0.00902562	0.0176943	-0.0410204	-0.0302009	-0.0218699	-0.0073047	0.0115284	0.0240633	0.0241459	-0.0541796	0.0573223	-0.0165243	0.0613562	-0.0170356	-0.102603	-0.0153633	0.00573458	0.0474289	-0.008522
190	0.172422	0.11316	0.134436	0.158857	0.045231	0.114745	0.136974	0.211498	0.258231	0.169692	0.0143548	0.207325	0.148441	-0.00149351	0.113557	0.0793322	0.153424	0.0304891	0.123814	0.035541	0.119988	0.124548	0.0352223	0.0158742	0.00528221	-0.0075713	0.015604	0.0278732	-0.0168277	-0.0491545	-0.0478234	-0.0097495	0.0141794	0.0421246	0.0434657	-0.0299526	0.0865218	-0.011627	0.00492784	-0.0005779	-0.0770245	-0.0019889	-0.0087162	0.056487	0.00046958
191	0.187738	0.131793	0.111235	0.175862	0.048024	0.119391	0.143908	0.18882	0.27181	0.136532	0.0065369	0.192548	0.14219	-0.000239527	0.0857056	0.0633957	0.174709	0.015116	0.132206	0.0403619	0.131077	0.124953	0.0553027	0.033861	0.023621	0.00200257	0.00277448	0.0211977	-0.0322119	-0.0552416	-0.0349043	0.0168655	0.0219194	0.0363446	0.0376316	-0.0161948	0.0974557	-0.0529475	0.0310017	0.0053475	-0.0533803	0.0256577	0.0166721	0.0602384	0.00477494
192	0.177302	0.130612	0.116848	0.18938	0.0272044	0.094691	0.127509	0.187358	0.290263	0.14992	0.0370103	0.229645	0.144517	0.0017352	0.0967324	0.0112991	0.16296	0.0290781	0.112168	0.0288439	0.146883	0.121415	0.0456101	0.0476946	-0.0130864	0.0173314	0.0010425	0.00993923	-0.0314464	-0.0645122	-0.0302918	0.00145841	-0.0119613	0.0650373	0.0478731	-0.0140307	0.0187212	-0.0556941	0.0266696	0.0096125	0.014388	0.00325852	0.0050242	0.0652004	-0.0034858
193	0.199734	0.0980874	0.138957	0.177031	0.0380655	0.127359	0.118291	0.187192	0.242256	0.132752	0.0136777	0.225088	0.139935	-0.0152927	0.106531	-0.00788124	0.151992	0.0277909	0.129607	0.0356686	0.114961	0.127082	0.0392687	0.0809971	0.0234374	0.0341391	-0.0032049	0.0317415	-0.0178405	-0.0322513	-0.0194969	0.0225972	0.00782429	0.0468597	0.0434527	-0.0363733	0.0398474	-0.0588101	0.026227	-0.0214153	-0.0142672	0.0373113	0.00567178	0.0701318	-0.011631
194	0.183426	0.106282	0.14007	0.19551	0.0244857	0.075154	0.105127	0.190625	0.266922	0.149716	0.0151969	0.196057	0.136179	-0.00218323	0.10784	0.00929474	0.17173	0.0297237	0.115061	0.015897	0.128907	0.122203	0.00564321	0.0697962	-0.0037071	-0.0172756	-0.0095607	0.029486	-0.032567	-0.0518518	-0.0363831	0.0198555	0.0118373	0.0371657	0.0505081	-0.0343154	0.0448809	-0.0863933	0.0423097	-0.00634	-0.019847	0.0500802	0.032406	0.0622204	-0.0305728
195	0.209178	0.110643	0.148212	0.163407	0.0202565	0.0665445	0.122644	0.18052	0.222915	0.15502	0.0288024	0.204992	0.131681	-0.00942364	0.110833	0.00123908	0.161495	0.0371725	0.0990692	0.00554118	0.134232	0.119481	0.0161315	0.061628	0.0195346	0.00327358	-0.0129305	0.0288386	-0.0292497	-0.0173783	-0.02069	0.012039	-0.0043174	0.0302072	0.0519232	-0.0271329	0.0451529	-0.0161376	0.00280317	-0.0145996	-0.0342787	0.0281549	0.0181204	0.0495072	0.0204592
196	0.231239	0.125472	0.144925	0.168817	0.0434062	0.0743318	0.141131	0.1756	0.247949	0.129171	0.0445549	0.196882	0.141593	0.00642024	0.104445	-0.0112346	0.150059	0.0328092	0.130685	-0.00171168	0.128764	0.123213	0.0211879	0.0587613	0.00107663	0.00547409	-0.0290407	0.00918604	-0.0122692	-0.0227527	-0.0305864	0.025419	0.00284871	0.0222653	0.0431177	0.00606757	0.0671618	-0.0817753	-0.000838	-0.0315644	-0.0322399	0.0144132	0.0366111	0.0493596	-0.0184146
197	0.217714	0.130835	0.148242	0.168414	0.0613796	0.0622714	0.130665	0.181581	0.268437	0.156416	0.0111983	0.231451	0.130962	0.0120468	0.0848824	-0.00529985	0.152991	0.0167471	0.133619	0.0374368	0.131522	0.0980026	0.0106586	0.0668701	0.00104469	0.00639155	-0.0414043	0.0175891	-0.0153658	-0.0103496	0.00609154	0.00886248	0.0468271	0.0189914	0.0443321	-0.0483037	0.0728211	0.00223783	-0.0010557	-0.0197566	-0.0543846	0.0797786	0.017689	0.0230746	-0.0616916
198	0.222046	0.128625	0.164909	0.15186	0.0517642	0.0632547	0.128131	0.181638	0.221831	0.164004	0.0428432	0.217037	0.149076	0.0104728	0.0846485	0.00409316	0.164192	0.0386987	0.135175	0.0308801	0.142638	0.118755	0.0316344	0.0572769	-0.0025895	-0.0059075	-0.0433094	0.0389696	-0.0224799	-0.0238722	-0.0248369	-0.001157	0.0393192	0.0418233	0.0416633	-0.0442621	0.0941655	-0.0141952	0.00974457	-0.0111895	-0.0112952	0.0273726	0.0218413	0.0213937	-0.0252777
199	0.211474	0.114111	0.153142	0.163918	0.0625295	0.0888862	0.118804	0.165612	0.2698	0.113947	0.0207855	0.207848	0.112087	-0.021768	0.0832094	-0.0138689	0.166027	0.0280967	0.0853089	0.0253096	0.13999	0.115766	0.0250391	0.0553584	0.0094973	0.0313853	-0.0014071	0.0366456	0.0158848	-0.0050129	-0.013228	0.00225711	0.0315539	0.0451369	0.0429341	-0.0375149	0.0222886	-0.0106801	0.00669364	-0.0328219	0.00447821	0.0290249	-0.005644	0.0238736	-0.0447511
200	0.195892	0.113035	0.143135	0.163361	0.0357426	0.0871438	0.0770115	0.157317	0.276581	0.12839	-0.00216497	0.183359	0.143131	-0.0133286	0.082432	0.00408368	0.191756	0.00641136	0.0990548	0.0182341	0.13596	0.0992873	0.0273327	0.0371722	0.0180808	0.0315877	-0.0026591	0.00498903	0.0115574	-0.0175751	-0.0486173	-0.0084876	0.0419033	0.0319984	0.0321473	-0.0355318	0.039986	0.0320778	0.0407657	-0.0172731	0.00239399	-0.0077572	-0.0056948	0.0224338	-0.0714288
201	0.213703	0.113034	0.12742	0.157865	0.0723722	0.105826	0.0905197	0.158155	0.271658	0.145632	0.0469244	0.151181	0.108857	0.0177466	0.091661	0.00563927	0.1884	0.0303264	0.111335	0.0100302	0.107804	0.113569	0.0201437	0.0292594	0.0341159	0.0192622	-0.006532	0.0182905	0.00798922	0.00170774	-0.0323293	-0.0182017	0.0219818	0.052541	0.0351957	-0.0585639	0.0403945	0.00863857	0.0300635	0.00580619	-0.0339482	0.00612056	0.0186343	0.0277468	-0.0871901
202	0.207457	0.115789	0.154361	0.166224	0.0731339	0.0877709	0.0941078	0.179845	0.255875	0.154623	0.0379557	0.172353	0.120321	0.0054488	0.102454	-0.00522496	0.181712	0.0339452	0.146039	0.0174612	0.145104	0.124788	-0.0194076	-0.0054849	0.0163908	0.0381643	0.0276213	0.0200357	0.0239167	0.00865955	-0.0272851	-0.0241477	0.0170308	0.0190048	-0.0072678	0.00089504	0.0186422	0.0136633	0.0393267	-0.0274424	-0.0244043	-0.0313925	0.00642147	0.0191015	-0.0739114
203	0.194475	0.122305	0.15613	0.160283	0.0284926	0.0958125	0.12727	0.162933	0.282998	0.124739	0.0309533	0.172849	0.146491	0.0176901	0.105913	0.000368426	0.164057	0.0309964	0.106153	0.01414	0.114722	0.119806	-0.0195378	0.0370696	0.0177979	0.0151574	-0.001512	0.0111635	0.0141349	-0.0296215	-0.0197791	-0.0322824	0.0271586	0.0240271	0.0138666	0.0129079	0.0569708	-0.0081885	0.0291602	-0.0196906	-0.0042676	0.0101709	0.0229825	0.0322813	-0.0147944
204	0.206103	0.134254	0.14709	0.173311	0.0303198	0.0987083	0.118172	0.157658	0.239574	0.142888	0.0374891	0.141301	0.114179	0.0279651	0.0972102	0.0208928	0.144222	0.02933	0.141215	-0.00545877	0.135991	0.112663	-0.0113073	0.0619941	0.00403647	0.035644	0.00504886	0.0184631	0.00430603	-0.0127737	-0.0120711	-0.03302	0.00812656	0.0100843	0.0516054	-0.0292459	0.0691314	-0.0379848	0.00701141	-0.006848	0.0172848	-0.0266592	0.0220749	0.0340721	-0.0835502
205	0.203565	0.128579	0.158767	0.162015	0.00157023	0.0852171	0.125428	0.169521	0.2275	0.165246	0.0330478	0.133575	0.113618	-0.00164596	0.0974181	-0.0231699	0.147493	0.0286278	0.14825	0.0324221	0.131091	0.10839	-0.026394	0.0373313	0.0289416	0.00854647	-0.0200252	0.0251792	-0.0122082	-0.0405615	-0.0058266	-0.0474624	0.00647329	0.0211307	0.0381331	-0.0003697	0.0490426	0.006127	0.0184227	-0.0149115	0.00526805	-0.0297659	0.00640895	0.0332625	-0.0717286
206	0.178809	0.126894	0.170623	0.166456	0.0102594	0.0681039	0.151703	0.176843	0.217032	0.16101	0.0292236	0.124361	0.125297	0.0148066	0.106723	0.0249336	0.154046	0.0352893	0.121519	-0.00388335	0.131162	0.111075	0.0167924	0.0404564	0.00551886	0.00477724	-0.0391721	0.0247618	0.0004499	-0.0335395	-0.0016804	-0.0349047	0.0329282	0.0367859	0.0263734	-0.0164909	0.0168961	-0.011663	0.00614528	0.00313196	-0.0067707	0.0106907	0.015355	0.051344	-0.0763729
207	0.162704	0.15087	0.150091	0.171493	-0.00317066	0.0952108	0.147101	0.15674	0.18121	0.151883	0.0282877	0.135377	0.114051	0.0218659	0.0944029	0.0202207	0.156348	0.0159062	0.105965	0.0374751	0.0901253	0.0988773	0.00850453	0.0151729	4.0058e-06	4.3073e-06	-0.0041023	0.0247586	0.0077371	-0.0157527	-0.013825	-0.0238655	0.0112564	0.00825639	0.0324041	0.00237048	0.0439653	0.00297434	0.0224424	-0.0349908	-0.0096914	-0.0022464	0.0202741	0.0193356	-0.0616919
208	0.187645	0.140943	0.155882	0.174227	-0.0162021	0.0883943	0.142155	0.131798	0.23659	0.165271	0.0407579	0.163762	0.0953898	-0.00197404	0.111914	0.0241058	0.173416	0.0455005	0.125865	0.035057	0.124072	0.127355	-0.0103227	0.0288585	0.0189526	-0.0160999	-0.0034927	0.00429896	-0.0183944	-0.0228871	-0.0263489	-0.0038194	0.032825	0.013247	0.0235007	-0.0078375	0.0157736	-0.0174632	0.0588212	-0.0180089	-0.04315	-0.0103421	0.0172007	0.0160704	-0.0537428
209	0.187562	0.15737	0.156897	0.174352	0.0173286	0.121197	0.154804	0.139188	0.240185	0.167317	0.0453835	0.141515	0.113975	0.0239629	0.103257	0.0157834	0.161033	0.0355936	0.119299	0.0204599	0.137289	0.110237	0.00720015	0.0149749	0.0450795	-0.0461448	0.0274356	0.00507715	-0.0027316	-0.0521387	0.0184223	-0.0040422	0.0254946	0.0135569	0.0358245	0.00497623	0.0581665	-0.0526492	0.0348146	-0.0048288	-0.0129628	-0.0048488	-0.005601	0.0118938	-0.0311358
210	0.193765	0.152083	0.137931	0.173035	0.00204893	0.116182	0.170786	0.120389	0.266558	0.147634	0.0132181	0.134993	0.104529	0.00461122	0.109205	0.0262172	0.154712	0.0240304	0.122776	0.0136226	0.150999	0.113423	0.021255	0.0122558	0.067162	-0.0222911	0.035535	-0.0129129	0.00698845	0.0205556	0.0282159	-0.0035528	0.0326226	0.0216917	0.00135898	0.00571378	0.0771935	-0.0345104	0.0182075	-0.0226732	-0.0361054	0.00255062	0.00297948	0.0137627	-0.0481137
211	0.192495	0.178408	0.136246	0.150504	0.00344569	0.09079	0.164678	0.130063	0.215496	0.154991	0.00770618	0.156511	0.103722	0.024201	0.0965899	0.0349527	0.17534	0.00983258	0.129449	0.0238243	0.158982	0.0804412	0.0234332	0.0402018	0.0767941	-0.0115162	0.0159099	-0.0107484	-0.0087473	0.00925812	0.0133703	-0.0197285	0.0123039	0.0112383	0.00828311	0.0245482	0.0156152	0.00633845	0.0160357	-0.0215764	0.00546275	0.0491692	0.0163104	0.0137092	0.0124437
212	0.184638	0.157414	0.159035	0.170111	0.00165299	0.105247	0.14736	0.143997	0.217625	0.136531	0.00692602	0.162256	0.0778888	0.023425	0.121771	0.00739757	0.151244	0.0115064	0.126569	0.0351103	0.158967	0.0778576	0.0593666	0.0371706	0.0395046	-0.0246788	0.0199548	-0.001782	-0.0151376	-0.0287461	0.00809314	-0.0178546	0.022032	0.0134819	0.00883157	-0.0015164	0.0461955	0.0262108	0.0166973	-0.0236935	-0.0069757	0.0438837	0.00489894	0.0120577	0.00874082
213	0.199247	0.162313	0.146717	0.153554	0.0166756	0.12736	0.121352	0.139338	0.220697	0.145862	0.00479335	0.189047	0.0870479	0.0112902	0.102075	0.00595011	0.153055	0.0209568	0.107232	0.0354549	0.127667	0.0754616	0.0539779	0.0401999	0.0627289	0.0168043	0.015618	0.0185264	0.00154566	-0.0425564	-0.0216343	-0.0142753	0.0398049	0.0166054	0.0118527	0.00763501	0.0778971	0.0391801	0.0308678	-0.0212752	0.0142613	0.0120917	0.025299	0.0319539	0.017396
214	0.167136	0.155915	0.138262	0.14703	0.0087823	0.149497	0.122016	0.139352	0.224231	0.161048	0.00938726	0.130241	0.0995229	0.0128055	0.10915	-0.0180527	0.158021	0.0109482	0.123944	0.0242552	0.165732	0.0937835	0.0479523	0.0225127	0.0543631	0.0161932	0.0226865	0.0133704	0.0156473	-0.0238029	0.00667866	-0.0127675	0.0532515	0.0256512	-0.0028304	0.0378518	0.0862445	0.0459677	0.031956	-0.0378661	-0.0115487	-0.0148546	0.0336469	0.0245325	0.0276671
215	0.182607	0.152448	0.145947	0.175834	0.0243554	0.0833124	0.13932	0.164758	0.202016	0.157282	0.00759172	0.161398	0.0994969	0.0314046	0.116821	-0.00292081	0.180702	0.00682766	0.107515	0.0360063	0.15318	0.0802549	0.0466504	-0.0012729	0.0281314	0.0309385	0.0197986	0.0113417	0.00123168	-0.0399301	-0.0263094	-0.0054006	0.0371023	0.0178355	0.0161756	0.010113	0.0293378	-0.0175014	0.0220913	-0.0237191	-0.0239619	0.00386022	0.0415716	0.0341629	0.00983587
216	0.17743	0.145427	0.122655	0.152944	0.0451327	0.0929233	0.140225	0.151026	0.227595	0.173618	0.00214778	0.140667	0.0855353	0.0510999	0.121587	-0.0623792	0.181356	0.0103007	0.0923544	0.0425639	0.175239	0.0715335	0.0310059	-0.0332646	0.0499074	0.0774745	-0.0187634	0.0246248	0.00099766	-0.0266692	-0.0161568	-0.0161049	0.0188638	0.00612134	0.00907335	0.0110078	0.0256517	0.0610487	0.00229616	-0.0002494	-0.0195346	-0.0023567	0.0281211	0.0135213	-0.0160176
217	0.204576	0.147863	0.114787	0.130862	0.0589635	0.0880331	0.127998	0.140428	0.222178	0.163537	0.00188168	0.155632	0.108283	0.00648474	0.110993	0.0261485	0.165731	0.0141585	0.0906886	0.0713926	0.188212	0.0814584	0.0647621	-0.0363959	0.0397722	0.0315759	-0.0001678	0.0192043	-0.019214	0.0158966	-0.0163355	-0.0311121	0.0220415	0.00262701	0.0365479	0.00327481	-0.0192654	0.00621056	0.0301528	-0.0327341	-0.0381964	-0.0094686	0.0221864	0.00535601	-0.0238586
218	0.203589	0.151975	0.119428	0.11839	0.0574477	0.106322	0.125112	0.147726	0.224822	0.141519	-0.00488817	0.121749	0.0961692	0.0240411	0.129325	0.00110842	0.163534	-0.00849199	0.087515	0.0556283	0.184201	0.0751482	0.0590116	-0.0269908	0.0274039	0.00752279	-0.0120783	0.0169254	-0.0076514	0.00194926	-0.0138419	-0.0292657	-0.0107937	-0.0198642	0.0103237	-0.0007899	-0.0023387	0.0396793	0.0252481	-0.0205959	-0.0533057	0.0103596	0.0122028	0.00840339	-0.0117197
219	0.206295	0.139712	0.125231	0.127749	0.0274082	0.0801177	0.116087	0.178455	0.213693	0.124369	0.0117865	0.134576	0.0833809	0.0454831	0.12209	-0.0175533	0.170754	0.0247498	0.0794801	0.0594281	0.156872	0.0626893	0.0612269	-0.0446315	0.016499	-0.0256305	-0.0205763	0.0190378	-0.0121139	0.0173572	-0.0291392	-0.0218803	-0.0024202	0.0116003	0.00999731	0.0182087	0.00651132	0.0445461	0.020299	-0.0199527	-0.0310189	0.0534365	0.0210528	0.0071127	-0.0126178
220	0.209652	0.131216	0.112319	0.138105	0.0653357	0.0889288	0.116822	0.1411	0.234985	0.160818	0.0251088	0.131845	0.0927857	4.40067e-07	0.121132	0.00164672	0.161476	0.0327247	0.0917991	0.0771102	0.177504	0.0711726	0.0367522	-0.0029836	-0.0246963	0.00942314	-0.0391749	-0.0014112	-0.0134816	0.0107663	-0.0097367	-0.026991	0.0215928	-0.0002545	0.00769843	0.00341795	0.0163812	0.0166663	-0.0043651	-0.016831	-0.0286121	0.00290944	0.0244377	0.0147267	-0.0418165
221	0.220801	0.128249	0.110362	0.116388	0.0314632	0.090288	0.130246	0.165543	0.226567	0.13294	0.0382621	0.135956	0.0991663	0.0082538	0.109111	-0.0121211	0.180671	0.0223823	0.0980867	0.0557328	0.125483	0.0745049	0.0351392	-0.0300722	0.0102154	0.0443086	-0.0480794	-0.0023931	-0.0322937	0.00505466	0.00287145	-0.0260097	0.0205405	0.013024	0.0255254	0.0218134	0.0444143	-0.0520878	0.0215712	-0.0492937	-0.0355207	0.0210238	0.0179136	0.019516	-0.0211081
222	0.206296	0.136542	0.118214	0.123027	0.0390179	0.0892188	0.154617	0.17241	0.25181	0.148748	0.0359155	0.120522	0.102412	0.0201465	0.128748	-0.0257555	0.161111	0.0259987	0.0914555	0.0689794	0.140447	0.0912433	0.0254632	-0.0280606	-0.0375421	-0.0098141	-0.0202194	0.0275979	0.00917106	-0.0034942	-0.0123915	-0.0200348	-0.0051454	0.00580855	0.0220028	0.00175449	0.0742778	0.0164363	0.0377133	-0.0257534	0.00503007	0.0598718	0.0301812	-0.0024164	-0.0296427
223	0.200565	0.131689	0.123135	0.119338	0.0395934	0.0759178	0.147709	0.152409	0.229772	0.166637	0.0281711	0.104189	0.0818418	0.0218804	0.127897	-0.0382589	0.174493	0.017778	0.106799	0.0628192	0.12934	0.094131	-0.0074668	-0.0050429	-0.0037495	-0.0140643	-0.0122374	0.00370657	-0.024496	0.0265433	-0.0235107	-0.0158179	0.00465194	0.00732859	0.0200084	0.0271755	0.0626758	0.00497666	0.0591009	-0.0489006	-0.0336626	0.0530366	0.0176455	0.0146074	-0.0418088
224	0.210648	0.140638	0.131754	0.116779	0.0439156	0.0910367	0.13344	0.179153	0.193233	0.127687	0.0154531	0.137461	0.073528	0.0260376	0.133856	-0.0133451	0.200703	0.0321753	0.083884	0.0898148	0.153033	0.0976001	0.0347406	-0.0062332	0.00726071	0.0323228	-0.0281345	0.0208536	-0.0283297	0.0214104	-0.0283709	-0.0297996	-0.0147968	-0.0094698	0.054668	0.0186119	0.0564277	-0.0169233	0.0433836	-0.0301008	-0.0399503	0.0503694	-0.0015097	0.0177602	-0.0427319
225	0.220807	0.158325	0.13747	0.120429	0.0357504	0.128651	0.154264	0.170722	0.191211	0.152848	0.0164598	0.129668	0.0817006	0.0094331	0.118358	0.013716	0.185701	0.0332646	0.124197	0.0905031	0.135364	0.112702	-0.0094587	0.0141229	-0.0114209	-0.0045872	0.00819134	0.0308817	-0.0159359	0.0276556	-0.0395238	-0.0451702	-0.0263039	-0.0116936	0.048024	0.0125177	0.0502372	-0.0314899	0.0663326	-0.0441718	-0.0309984	0.0644202	-0.0019323	-0.0009427	-0.0233485
226	0.19515	0.138309	0.142525	0.115156	0.0552746	0.100495	0.156701	0.185557	0.193112	0.150937	0.0291768	0.127552	0.0943854	0.0141173	0.114368	-0.00041874	0.182045	0.0405903	0.074235	0.0871602	0.112284	0.0902794	-0.0021573	-0.0083804	0.0262475	0.0347844	-0.0139202	0.0250893	-0.055103	0.0485214	-0.0344964	-0.0157883	-0.0060608	-0.0155985	0.0457777	-0.0110918	0.0212373	0.0809076	0.0888738	-0.0644632	-0.0364381	0.0348847	0.023648	-0.0021822	-0.0106975
227	0.200409	0.138006	0.133695	0.116796	0.0120712	0.143092	0.160764	0.19532	0.208514	0.131339	0.00642177	0.151649	0.107563	0.0028026	0.109319	0.0154979	0.210294	0.0293438	0.106752	0.0983228	0.0964588	0.0979517	0.0182722	0.00658306	0.00240708	0.0143607	-0.0027055	0.0146289	0.0129798	0.0666203	-0.0437792	-0.0017281	-0.0223828	-0.0329585	0.0243965	0.0051542	0.0223582	0.00976482	0.05094	-0.0529215	-0.032885	0.0199723	-0.0095868	0.0180306	0.00760318
228	0.206684	0.128255	0.131815	0.114889	0.0478776	0.124466	0.135014	0.187611	0.211669	0.155206	0.0194431	0.162715	0.116248	0.00179969	0.104278	-0.0338018	0.181844	0.0316438	0.102639	0.100232	0.124448	0.0909983	-0.0106343	-0.0201545	0.0322331	0.0378608	0.0169272	-0.009974	-0.001554	0.0436954	-0.0297447	0.0164761	0.00288479	-0.0407494	0.0326519	0.0245624	0.042182	0.0102999	0.0385269	-0.0307427	-0.0242985	0.0329688	-0.0071905	0.0398247	-0.0026795
229	0.210342	0.140947	0.153308	0.133808	0.0499945	0.124862	0.174424	0.207406	0.184272	0.156749	0.0024253	0.181584	0.114978	0.0185004	0.102375	0.0110523	0.190714	0.0285945	0.109779	0.106303	0.118579	0.0860509	-0.0088763	0.0198152	0.02198	-0.0185383	0.00150913	-0.0396482	0.00156039	0.0671218	-0.0285291	0.0171537	0.0291762	-0.0229095	0.0416203	0.0222983	0.0110541	-0.0116999	0.0492662	-0.0515162	-0.0170033	-0.0195979	-0.0133512	0.0409925	0.0296354
230	0.219214	0.148687	0.166565	0.132599	0.0702067	0.108915	0.184653	0.193879	0.203435	0.14043	0.00791791	0.17205	0.117849	0.0185181	0.101779	-0.0358223	0.214635	0.0434859	0.101009	0.0618076	0.14288	0.121785	-0.0110381	0.0156269	0.0394312	-0.0789365	-0.0140407	-0.0363808	-0.0056999	0.0771054	-0.0367883	0.0244598	0.00497869	-0.0309413	0.0394704	0.00753063	0.023798	-0.0267828	0.0520794	0.00365327	-0.0379481	-0.0128348	-0.0190232	0.0238415	0.021498
231	0.216531	0.169566	0.155644	0.131141	0.0363361	0.148935	0.188662	0.205179	0.188628	0.156981	0.0361738	0.165193	0.122708	0.0130786	0.107557	0.0110923	0.209231	0.030076	0.0981407	0.0570668	0.0824421	0.108779	-0.0035751	0.0109946	0.0320624	-0.0749299	-0.0193911	-0.0246208	-0.0331269	0.0591561	-0.0488909	0.0210915	-0.0070049	-0.0162508	0.0131536	0.0138158	0.0207504	-0.044326	0.0369208	-0.0333373	-0.0279828	-0.032029	0.00549769	0.0426339	0.0169934
232	0.206283	0.15282	0.165214	0.1414	0.0315753	0.110655	0.180987	0.225607	0.178757	0.143212	-0.00508137	0.166259	0.119768	0.00835132	0.105561	-0.0551522	0.201506	0.0143639	0.1138	0.0735427	0.132095	0.115298	-0.016592	0.0145308	0.0347219	-0.0475564	-0.001333	-0.0297985	-0.021451	0.0977802	-0.0224926	0.0287922	0.0206957	-0.0232029	0.0121131	0.00305489	0.0190939	-0.0596087	0.0580008	-0.0228544	-0.0515394	0.024268	-0.0019066	0.0456668	0.00358652
233	0.187419	0.13617	0.141962	0.137247	0.0306624	0.126692	0.210798	0.219938	0.182076	0.150664	0.039603	0.172517	0.113607	0.0050622	0.106086	-0.00499685	0.182507	0.0241525	0.0912614	0.0722446	0.133718	0.109359	0.0310223	-0.0089121	0.0423678	-0.0307741	-0.0149748	-0.0204277	-0.0018592	0.10034	-0.0574121	0.0131859	-0.0052809	-0.0299711	0.0239263	-0.0076964	0.0497138	0.0221222	0.0647264	-0.0137022	-0.0335772	-0.00616	-0.0173165	0.0197016	0.00321011
234	0.163064	0.136929	0.146215	0.143558	0.0292091	0.108788	0.152342	0.228694	0.202524	0.140689	0.0379514	0.134181	0.138125	-0.0172911	0.0948652	-0.00418242	0.178971	0.0241521	0.0972602	0.0556818	0.116525	0.117037	0.0462619	0.00682447	0.029736	-0.0537355	0.0155103	-0.0148421	-0.0380501	0.0923338	-0.0453713	0.00625573	0.00202363	-0.0147416	0.00723035	-0.0241477	0.0226926	-0.0225272	0.0814127	-0.007112	-0.0397916	-0.0386262	-0.0057758	0.00438579	0.0127378
235	0.181912	0.129797	0.135748	0.137736	0.0329235	0.128447	0.174445	0.221384	0.215387	0.148893	0.0166639	0.147384	0.138179	-0.00379491	0.107946	-0.0256375	0.168382	0.0200656	0.0942768	0.0795444	0.132914	0.111232	0.0468185	0.0130912	0.0343292	-0.0352794	-0.0003985	-0.0086132	-0.0564161	0.112196	-0.0251466	0.0171602	0.00278133	-0.0187665	0.0196739	0.0053774	0.0136618	-0.049783	0.0673584	0.00562618	-0.0255113	0.0255403	-0.0080231	0.00388114	0.0263612
236	0.170102	0.118656	0.1586	0.168736	0.0350233	0.147815	0.193391	0.216771	0.224944	0.154918	-0.0120014	0.140815	0.133709	0.0114997	0.0965658	-0.0218428	0.176869	0.0288603	0.0735784	0.0806738	0.153097	0.107248	0.0295107	0.00551761	0.0273314	-0.053124	0.00684781	-0.0113133	-0.0514772	0.106515	-0.0155932	0.0165565	0.00865164	-0.0080418	0.0381888	-0.0122674	0.0510845	-0.0354046	0.0563888	-0.01759	-0.0380385	-0.0163332	-0.0217352	0.0194033	0.0182517
237	0.157423	0.114066	0.143554	0.141122	0.0148132	0.171659	0.21761	0.231521	0.217544	0.169702	-0.00603346	0.145929	0.138684	-0.0202379	0.10433	0.0117601	0.177629	-0.00341192	0.0711895	0.0889045	0.118026	0.117723	0.0217925	0.00200569	0.00698726	-0.068148	-0.027146	-0.0210503	-0.0385862	0.0895048	0.00140859	0.0116556	0.00951495	-0.0001462	0.0407229	-0.0034785	0.0376663	0.0147981	0.0348929	0.0270645	-0.0210705	-0.0117282	0.012102	0.0265321	0.0282798
238	0.176172	0.129173	0.173035	0.162217	0.0254215	0.135342	0.181834	0.233257	0.224187	0.163684	-0.0221358	0.175424	0.136041	-0.0337128	0.0924737	0.00956457	0.190767	0.0072275	0.0951455	0.0790758	0.141075	0.0863159	0.0390425	0.0195645	0.0504308	-0.0199619	-0.0084889	0.00165148	-0.0216945	0.127502	-0.0160946	0.0117113	0.0204649	0.017813	0.0646593	-0.0109224	0.0427198	-0.0510822	0.0544911	0.00826591	0.00082499	-0.0228899	-0.0025765	-0.0057472	0.00616499
239	0.188985	0.144501	0.171932	0.135848	0.0336721	0.154172	0.213815	0.224583	0.209589	0.180612	-0.00625811	0.144622	0.129123	-0.00202147	0.107167	-0.0448282	0.145019	0.017113	0.0768695	0.0650036	0.122201	0.0859163	0.00990567	0.00821977	0.0419651	-0.0353062	-0.0052388	-0.021222	-0.0404248	0.117924	-0.0414702	-0.0016855	0.00994037	0.0188183	0.0599671	0.00686897	0.029232	-0.0113853	0.031135	0.00488594	-0.0078734	0.00703044	-0.018661	0.00182318	0.00346113
240	0.149129	0.123381	0.182016	0.154319	0.0540995	0.154002	0.20414	0.230164	0.222639	0.165585	0.0166754	0.134157	0.134078	-0.0269351	0.09592	-0.00392753	0.181197	0.0392382	0.093777	0.0919619	0.128472	0.0928323	0.0456326	0.0232026	0.0231589	-0.0765648	-0.0016439	0.0179311	-0.024167	0.106252	-0.0155752	0.016432	0.00244029	0.024068	0.0644895	0.00448178	0.0538412	-0.0213706	0.0593256	0.00235851	-0.0502408	-0.0238742	-0.0075879	0.0093736	0.0144528
	0.149129	0.123381	0.182016	0.154319	0.0540995	0.154002	0.20414	0.230164	0.222639	0.165585	0.0166754	0.134157	0.134078	-0.0269351	0.09592	-0.00392753	0.181197
																																															0	0
																																															0	0
																																															0	0
