# Supplementary material for: ESCO1 and CTCF enable formation of long chromatin loops by protecting cohesinSTAG1 from WAPL
Source: eLife. 2020 Feb 17;9:e52091. doi: 10.7554/eLife.52091 (PMC7054000; doi:10.7554/eLife.52091)
Supplement: Figure 3—figure supplement 3—source data 1. [file elife-52091-fig3-figsupp3-data1.xlsx]

## Sheet: Sheet1
time (s)	EGFP-STAG1 control RNAi																	RFP-STAG2 control RNAi																	EGFP-STAG1 CTCF RNAi
-25.4335	1	1	1	1	1	1	1	1	1	1	1	1	1	1	1	1	1	1	1	1	1	1	1	1	1	1	1	1	1	1	1	1	1	1	1	1	1	1	1	1	1	1	1	1	1	1	1	1	1
-20.4475	1	1	1	1	1	1	1	1	1	1	1	1	1	1	1	1	1	1	1	1	1	1	1	1	1	1	1	1	1	1	1	1	1	1	1	1	1	1	1	1	1	1	1	1	1	1	1	1	1
-15.4389	1	1	1	1	1	1	1	1	1	1	1	1	1	1	1	1	1	1	1	1	1	1	1	1	1	1	1	1	1	1	1	1	1	1	1	1	1	1	1	1	1	1	1	1	1	1	1	1	1
-10.4303	1	1	1	1	1	1	1	1	1	1	1	1	1	1	1	1	1	1	1	1	1	1	1	1	1	1	1	1	1	1	1	1	1	1	1	1	1	1	1	1	1	1	1	1	1	1	1	1	1
-5.42161	1	1	1	1	1	1	1	1	1	1	1	1	1	1	1	1	1	1	1	1	1	1	1	1	1	1	1	1	1	1	1	1	1	1	1	1	1	1	1	1	1	1	1	1	1	1	1	1	1
0	0	0	0	0	0	0	0	0	0	0	0	0	0	0	0	0	0	0	0	0	0	0	0	0	0	0	0	0	0	0	0	0	0	0	0	0	0	0	0	0	0	0	0	0	0	0	0	0	0
4.88611	0.262905	-0.01922	0.009822	0.125695	0.062557	0.116171	-0.06706	0.076357	0.058684	0.071038	0.067181	0.125211	0.160492	0.066926	0.082171	0.005543	0.060273	0.152948	0.162641	0.173368	0.220671	0.24527	0.14311	0.131262	0.116405	0.150601	0.084645	0.076271	0.248981	0.124262	0.077802	0.111312	0.166203	-0.01118	0.150927	0.03592	0.15405	0.108738	0.119596	0.209632	0.113976	0.0208	0.031631	0.193823	0.130655	0.190897	0.09867	0.089184	0.11382
9.89475	0.119752	0.134206	0.092065	0.094142	0.120201	0.055527	0.060967	0.054646	0.118212	0.090467	0.020518	0.075499	0.1859	0.135357	0.039235	-0.04151	0.022066	0.32639	0.138315	0.143675	0.278995	0.252493	0.337239	0.08552	0.18333	0.188023	0.119475	0.151394	0.280477	0.255211	0.223462	0.100768	0.198456	0.073596	0.1906	-0.06568	0.088176	0.135083	0.270929	0.172949	0.223775	0.014155	0.101532	0.084075	0.115689	0.196924	0.221624	0.121305	0.15074
14.9019	0.175747	0.07585	0.044744	0.104327	0.14518	0.100266	0.028034	0.070153	0.03076	0.071977	0.07815	0.140432	0.205846	0.093748	0.137869	0.069508	0.136968	0.281462	0.174107	0.189881	0.375882	0.465554	0.240146	0.291758	0.199557	0.234054	0.217688	0.099942	0.309292	0.319473	0.282901	0.3166	0.253971	0.026799	0.295901	0.282527	0.180362	0.174697	0.392759	0.185353	0.143642	0.12392	0.126613	0.16831	0.095264	0.316724	0.095326	0.161113	0.223935
19.9105	0.27201	0.034379	0.140698	0.135296	0.213433	0.175953	0.137823	0.119864	0.122528	0.133425	0.1113	0.146407	0.206873	0.156075	0.142713	0.105267	0.073974	0.300167	0.207937	0.130347	0.33092	0.440635	0.36323	0.167777	0.257035	0.386526	0.253509	0.172767	0.364722	0.29881	0.414256	0.283638	0.224065	0.072994	0.331103	0.22978	0.17646	0.152704	0.185464	0.230696	0.238697	0.163542	0.071318	0.072438	0.19114	0.320474	0.223306	0.130813	0.214218
24.8677	0.220586	0.123363	0.039149	0.10685	0.048317	0.257434	0.076831	0.130018	0.075743	0.118387	0.12423	0.212241	0.315154	0.167426	0.173277	0.163303	0.105282	0.365708	0.308824	0.287677	0.427567	0.448027	0.411452	0.184592	0.196916	0.307735	0.329642	0.217459	0.460399	0.228149	0.408079	0.222966	0.231904	0.102233	0.393771	0.054788	0.225372	0.201735	0.29046	0.271741	0.244585	0.188783	0.110258	0.144609	0.197765	0.389838	0.142693	0.148338	0.157726
29.8764	0.203635	0.143761	0.067241	0.196884	0.179139	0.284809	0.080988	0.194721	0.219059	0.125228	0.078431	0.195657	0.250239	0.195538	0.202519	0.101563	0.150377	0.361211	0.361764	0.3095	0.448293	0.518758	0.23737	0.22468	0.336638	0.270254	0.365459	0.219859	0.361733	0.349908	0.425886	0.314521	0.303188	0.195055	0.299649	0.124169	0.216582	0.237692	0.378106	0.290959	0.191878	0.185411	0.226928	0.212463	0.192999	0.429071	0.172595	0.170713	0.183659
34.885	0.232196	0.181362	0.127747	0.170823	0.108178	0.256084	0.216111	0.121694	0.117553	0.134256	0.09599	0.172365	0.314935	0.168277	0.205174	0.14938	0.149199	0.448524	0.396614	0.321824	0.507982	0.508448	0.343384	0.341077	0.301606	0.36384	0.412348	0.221568	0.509994	0.417936	0.479152	0.337639	0.317112	0.153259	0.363873	0.371925	0.254252	0.258768	0.231378	0.279426	0.184168	0.197213	0.186706	0.222759	0.229829	0.427889	0.11544	0.190792	0.282378
39.8936	0.239922	0.105113	0.128863	0.201496	0.312913	0.252787	0.102418	0.198661	0.161552	0.154557	0.146079	0.17867	0.309106	0.214356	0.138093	0.139202	0.156749	0.449259	0.412766	0.309866	0.439463	0.672821	0.476931	0.335421	0.321117	0.285392	0.316688	0.308461	0.425408	0.451477	0.550464	0.374316	0.349296	0.163909	0.38878	0.036536	0.191281	0.27526	0.353715	0.281508	0.195305	0.167141	0.196423	0.191319	0.289648	0.441946	0.148756	0.237671	0.201485
44.9023	0.281	0.132081	0.087135	0.234456	0.155927	0.241095	0.107413	0.158235	0.215094	0.165758	0.126127	0.237724	0.289374	0.194	0.15959	0.099511	0.107064	0.333307	0.442981	0.25412	0.598093	0.559575	0.519018	0.394154	0.411494	0.366066	0.394943	0.262255	0.467142	0.484827	0.532605	0.428154	0.335229	0.109984	0.354588	0.283257	0.150468	0.316298	0.370387	0.349775	0.315401	0.166027	0.244433	0.257166	0.182156	0.386848	0.131556	0.197662	0.227375
49.9109	0.220663	0.213248	0.047557	0.350115	0.253073	0.30939	0.086094	0.181078	0.206027	0.223657	0.124939	0.241952	0.306468	0.138709	0.176226	0.095451	0.183262	0.445876	0.364126	0.271226	0.63314	0.609283	0.411485	0.268204	0.441362	0.385387	0.349852	0.276919	0.473685	0.413107	0.472039	0.459944	0.374204	0.250783	0.40165	0.270417	0.298793	0.229077	0.3727	0.335993	0.205431	0.239042	0.153289	0.211401	0.252458	0.440262	0.237334	0.314607	0.278302
54.9196	0.282881	0.153223	0.138149	0.311627	0.270063	0.319112	0.179089	0.129164	0.235376	0.177666	0.128578	0.223109	0.275727	0.249006	0.196187	0.134701	0.090478	0.43713	0.572912	0.33738	0.640707	0.696282	0.571714	0.398543	0.443177	0.382946	0.394133	0.320859	0.534832	0.508058	0.509334	0.532264	0.359153	0.239904	0.400473	0.037846	0.313159	0.300512	0.408188	0.41046	0.166643	0.24088	0.294193	0.13885	0.301015	0.400759	0.298021	0.22748	0.245462
59.8768	0.260495	0.194521	0.133277	0.268712	0.24264	0.230632	0.157817	0.129491	0.17204	0.218264	0.124995	0.085075	0.314009	0.256959	0.24196	0.129166	0.112944	0.444037	0.445977	0.341629	0.703219	0.677706	0.549566	0.39337	0.429478	0.415244	0.384401	0.342485	0.52381	0.498562	0.598434	0.548637	0.419243	0.236042	0.380537	0.209956	0.375164	0.28649	0.278007	0.316514	0.322303	0.27049	0.213264	0.240552	0.253763	0.396633	0.20843	0.240204	0.262002
64.8854	0.297039	0.288927	0.123323	0.335674	0.30235	0.249682	0.140433	0.1709	0.201278	0.155249	0.100196	0.217289	0.311765	0.277081	0.251679	0.22062	0.148103	0.567825	0.463715	0.383912	0.725985	0.658583	0.595908	0.406445	0.471369	0.412411	0.426953	0.315194	0.564044	0.530332	0.615095	0.528572	0.395935	0.241324	0.483559	0.118629	0.249574	0.276038	0.339122	0.351283	0.253204	0.230573	0.160152	0.262347	0.251719	0.386012	0.224795	0.219269	0.236571
69.8925	0.300233	0.230505	0.139221	0.309763	0.208336	0.268293	0.149637	0.121202	0.177143	0.168953	0.133857	0.130977	0.323229	0.267636	0.273237	0.098392	0.152957	0.509169	0.609525	0.454082	0.717435	0.674795	0.60775	0.396966	0.479615	0.459715	0.53349	0.283008	0.591226	0.468537	0.69996	0.638354	0.459527	0.228698	0.471192	0.531494	0.260275	0.318521	0.385145	0.359193	0.288455	0.212121	0.187633	0.19724	0.254497	0.49384	0.200273	0.366844	0.228654
74.9012	0.210368	0.232245	0.164871	0.307173	0.258772	0.313941	0.086041	0.16355	0.265075	0.247504	0.129225	0.240686	0.301282	0.292395	0.247134	0.1266	0.158357	0.547338	0.565391	0.379341	0.694767	0.61034	0.621015	0.503715	0.51262	0.449712	0.470181	0.39626	0.491632	0.497518	0.668338	0.593312	0.37846	0.348743	0.389762	0.361376	0.372771	0.278852	0.405011	0.315872	0.315446	0.246292	0.294279	0.32543	0.259931	0.509846	0.287663	0.266123	0.219254
79.9098	0.268193	0.244447	0.150661	0.266025	0.273548	0.279861	0.134004	0.154343	0.210041	0.164526	0.226106	0.255013	0.370122	0.332561	0.215354	0.203714	0.172337	0.501523	0.602306	0.420026	0.794356	0.718368	0.493173	0.402002	0.572534	0.503062	0.577817	0.336762	0.454359	0.509334	0.65594	0.640579	0.460928	0.252472	0.450638	0.582556	0.39541	0.40043	0.417765	0.306097	0.290831	0.261383	0.303815	0.370185	0.264619	0.500886	0.348801	0.236755	0.31583
84.9185	0.225245	0.268799	0.164799	0.164272	0.213043	0.277427	0.105336	0.137118	0.194391	0.19599	0.138556	0.247283	0.328828	0.239274	0.242431	0.136039	0.174385	0.571127	0.628048	0.450035	0.720379	0.775668	0.569202	0.492192	0.497837	0.459287	0.557395	0.392615	0.688684	0.524528	0.729648	0.611868	0.454663	0.303049	0.518411	0.336385	0.36201	0.280615	0.414739	0.434141	0.337901	0.291358	0.330976	0.313452	0.28258	0.440717	0.229237	0.351007	0.389707
89.9271	0.303334	0.280304	0.119703	0.32559	0.250244	0.289321	0.119985	0.174417	0.228596	0.234724	0.12832	0.110796	0.329589	0.310135	0.308365	0.159623	0.144867	0.555091	0.577681	0.414495	0.810162	0.763441	0.50537	0.441958	0.549607	0.478469	0.529068	0.450282	0.533851	0.54205	0.693482	0.643542	0.465103	0.271208	0.499827	0.585111	0.431945	0.299078	0.465757	0.33708	0.24868	0.392951	0.208468	0.327455	0.364182	0.529692	0.26691	0.284174	0.291704
94.8843	0.302768	0.293764	0.174491	0.291178	0.323134	0.293475	0.114398	0.207551	0.18777	0.185736	0.169767	0.066293	0.343943	0.323657	0.334618	0.187347	0.147997	0.572205	0.663318	0.488799	0.733952	0.755685	0.534449	0.505949	0.640321	0.567198	0.514056	0.375027	0.508559	0.58967	0.640361	0.625226	0.414816	0.432452	0.578799	0.519608	0.399341	0.312136	0.370905	0.444881	0.383541	0.281607	0.312218	0.386059	0.427689	0.594957	0.349254	0.428313	0.330009
99.8929	0.259787	0.344773	0.216955	0.333403	0.259842	0.342988	0.130411	0.208289	0.144331	0.240078	0.122575	0.173092	0.409966	0.310573	0.29667	0.1938	0.17216	0.54196	0.710068	0.460824	0.646634	0.825003	0.50384	0.51454	0.578188	0.435771	0.604245	0.306197	0.69462	0.492414	0.752744	0.800576	0.471465	0.381717	0.547633	0.745762	0.451013	0.232327	0.486424	0.48579	0.362292	0.291719	0.424199	0.279597	0.357568	0.588177	0.311484	0.246572	0.382863
104.902	0.377462	0.417605	0.142888	0.351196	0.279189	0.327344	0.198364	0.20225	0.177137	0.287933	0.142988	0.23726	0.383641	0.347232	0.394089	0.229676	0.194816	0.619733	0.694076	0.559477	0.812467	0.799941	0.646127	0.506771	0.52569	0.498672	0.587295	0.376836	0.566595	0.548607	0.63424	0.683181	0.501107	0.371908	0.493957	0.370546	0.404883	0.318131	0.370045	0.451529	0.505518	0.302454	0.384884	0.298087	0.358282	0.574411	0.315467	0.245494	0.256112
109.91	0.316451	0.382594	0.212037	0.275417	0.336366	0.346628	0.142442	0.195362	0.219497	0.207798	0.199292	0.277995	0.427264	0.329145	0.29572	0.156657	0.161279	0.622588	0.81802	0.462825	0.807859	0.72775	0.598969	0.583412	0.552238	0.581216	0.589657	0.480665	0.677024	0.579356	0.612695	0.678803	0.454702	0.334144	0.437457	0.912978	0.392872	0.307002	0.557789	0.400864	0.430112	0.339034	0.259673	0.390539	0.39912	0.578883	0.206648	0.335048	0.296052
114.919	0.284682	0.411045	0.195647	0.281949	0.363802	0.349678	0.042475	0.163224	0.200756	0.2766	0.15367	0.312666	0.38165	0.239403	0.337899	0.210838	0.155183	0.609824	0.725115	0.421669	0.760838	0.697973	0.720524	0.484682	0.551456	0.590721	0.67712	0.375661	0.712624	0.597066	0.72697	0.653128	0.42935	0.333894	0.462587	0.466454	0.481056	0.389183	0.389957	0.388113	0.330886	0.372475	0.321901	0.341394	0.389964	0.560134	0.380883	0.294342	0.321145
119.927	0.32697	0.353983	0.201265	0.363625	0.290799	0.422682	0.125744	0.127292	0.179929	0.245657	0.133477	0.363029	0.363455	0.35953	0.410999	0.145881	0.196837	0.490445	0.698205	0.481989	0.771082	0.779756	0.685707	0.464483	0.603583	0.431746	0.609136	0.487804	0.749703	0.578475	0.715067	0.699765	0.478242	0.390834	0.48844	0.609859	0.353292	0.380285	0.403555	0.378001	0.363165	0.391458	0.243354	0.285437	0.387633	0.564612	0.286127	0.351796	0.325686
124.883	0.275374	0.314625	0.142654	0.354852	0.368831	0.362106	0.230045	0.216024	0.231591	0.244273	0.153811	0.298525	0.386856	0.293906	0.400824	0.167061	0.121272	0.559132	0.75546	0.5646	0.73734	0.810185	0.784319	0.508034	0.524434	0.572435	0.650043	0.39911	0.716563	0.503138	0.736805	0.651912	0.51762	0.338125	0.482703	1	0.425678	0.363302	0.495215	0.395972	0.400934	0.396586	0.271516	0.364197	0.315634	0.541202	0.293613	0.351164	0.375558
129.892	0.300928	0.309857	0.196428	0.310108	0.394964	0.359321	0.093091	0.228241	0.212056	0.262917	0.137697	0.399425	0.305136	0.344273	0.307156	0.161742	0.16658	0.631901	0.842361	0.702119	0.812519	0.789359	0.651553	0.542096	0.617141	0.581549	0.647705	0.370281	0.675824	0.6052	0.780826	0.698308	0.462428	0.372924	0.488609	1	0.472171	0.271462	0.471902	0.400861	0.314185	0.317329	0.514095	0.366443	0.361078	0.582336	0.407765	0.284688	0.39858
134.9	0.261353	0.470596	0.231192	0.455725	0.370054	0.267015	0.16001	0.19377	0.246829	0.264055	0.095904	0.339078	0.306827	0.379817	0.403705	0.129457	0.225876	0.607252	0.891887	0.598879	0.828407	0.798377	0.60676	0.496716	0.614228	0.666519	0.648143	0.502169	0.711832	0.56973	0.825673	0.713425	0.459481	0.417095	0.503408	0.804114	0.465207	0.371035	0.428041	0.430449	0.408998	0.426714	0.308888	0.447372	0.339949	0.582516	0.441338	0.316257	0.284415
139.909	0.295165	0.432876	0.265643	0.427439	0.416114	0.373554	0.153561	0.193515	0.179599	0.269364	0.143329	0.467616	0.360334	0.481657	0.414785	0.146946	0.241891	0.58533	0.749807	0.50947	0.846901	0.801507	0.696739	0.545771	0.593197	0.580768	0.756302	0.420219	0.684713	0.629624	0.863306	0.662113	0.515125	0.444415	0.555199	0.888131	0.52947	0.399412	0.454645	0.395368	0.36323	0.46468	0.345465	0.314658	0.350255	0.664756	0.338206	0.433886	0.329223
144.918	0.320688	0.347632	0.183833	0.384399	0.342034	0.444053	0.107675	0.215981	0.240228	0.334039	0.153663	0.371913	0.404247	0.359029	0.356803	0.202945	0.196417	0.620333	0.85093	0.570811	0.808431	0.878453	0.677576	0.4654	0.576019	0.57931	0.602047	0.449467	0.694682	0.635385	0.789267	0.724897	0.562169	0.474389	0.607064	0.534662	0.542521	0.378073	0.407921	0.46384	0.274385	0.41877	0.296714	0.38058	0.410969	0.631534	0.342611	0.372481	0.41663
149.926	0.260619	0.490926	0.218334	0.407388	0.35561	0.401229	0.183015	0.161377	0.245103	0.346498	0.125658	0.517612	0.347867	0.435132	0.391284	0.23248	0.186776	0.575514	0.851303	0.510244	0.93778	0.920024	0.727188	0.57218	0.55332	0.720342	0.633366	0.509201	0.734833	0.662823	0.704596	0.696525	0.537822	0.403078	0.475883	0.720927	0.500534	0.409727	0.486106	0.503893	0.452507	0.4374	0.386795	0.403348	0.447038	0.62331	0.400693	0.356436	0.469892
154.935	0.32262	0.389539	0.211355	0.441459	0.416697	0.406054	0.056246	0.184139	0.328101	0.353845	0.089444	0.41728	0.415231	0.406781	0.414026	0.207954	0.169904	0.636903	0.808695	0.582691	0.9619	0.811654	0.70148	0.484621	0.664673	0.652118	0.630978	0.428762	0.877977	0.586102	0.80397	0.737086	0.565244	0.45017	0.448692	0.690793	0.454202	0.364565	0.377339	0.465241	0.413211	0.446688	0.427468	0.378109	0.37415	0.634873	0.395912	0.423858	0.516829
159.892	0.349597	0.493322	0.239984	0.442419	0.43913	0.309408	0.120985	0.214998	0.274336	0.252716	0.157296	0.459305	0.323938	0.402033	0.372917	0.213672	0.191163	0.601609	0.765203	0.532567	0.94147	0.824187	0.7399	0.47407	0.633844	0.667113	0.650843	0.490166	0.772337	0.593298	0.915533	0.788296	0.619842	0.421926	0.544521	0.852767	0.391574	0.463276	0.461965	0.436197	0.374738	0.340333	0.429116	0.460783	0.445675	0.662241	0.34132	0.374581	0.249749
164.901	0.36328	0.514513	0.230151	0.379353	0.365421	0.385515	0.08242	0.228447	0.250572	0.3716	0.112352	0.392775	0.325678	0.426204	0.438071	0.23651	0.237701	0.63223	0.930458	0.663097	0.915641	0.885922	0.768783	0.541474	0.700554	0.654344	0.735821	0.448623	0.767152	0.648202	0.868143	0.774471	0.522638	0.514291	0.429742	0.759867	0.513352	0.414931	0.482245	0.544277	0.370749	0.443413	0.448708	0.351978	0.37408	0.581923	0.360985	0.427227	0.372735
169.91	0.378334	0.631504	0.141749	0.488784	0.38322	0.491395	0.178818	0.232168	0.300463	0.27772	0.161764	0.493783	0.320539	0.395846	0.370873	0.183474	0.203873	0.571977	0.94465	0.570709	0.904782	0.952183	0.909113	0.526892	0.697444	0.629979	0.768563	0.494131	0.877079	0.628154	0.834381	0.866077	0.547568	0.466347	0.490243	0.727291	0.511246	0.393345	0.277514	0.519437	0.451293	0.377352	0.401128	0.463221	0.446009	0.616562	0.443584	0.384308	0.380132
174.918	0.336055	0.390947	0.232287	0.421413	0.362181	0.456261	0.114012	0.192447	0.233738	0.345555	0.204469	0.550326	0.319544	0.379179	0.367306	0.240353	0.205748	0.750424	0.855155	0.658322	0.860223	0.93224	0.709413	0.598512	0.698415	0.691466	0.782083	0.532608	0.827282	0.6832	0.882912	0.736405	0.61392	0.425358	0.561363	0.896028	0.592148	0.39426	0.415116	0.48059	0.428489	0.421435	0.344251	0.384098	0.446588	0.627966	0.350642	0.442867	0.321124
179.927	0.350284	0.442193	0.211047	0.438624	0.394818	0.480194	0.14785	0.196384	0.245496	0.274586	0.230296	0.49135	0.280428	0.424728	0.469215	0.222923	0.19972	0.767728	0.872404	0.685222	0.877619	0.848477	0.697873	0.575861	0.675577	0.705798	0.717326	0.400239	0.841023	0.701518	0.822854	0.851407	0.558902	0.407751	0.504175	0.968601	0.482054	0.334784	0.5442	0.439754	0.388666	0.437557	0.263787	0.431918	0.341994	0.605663	0.407924	0.447651	0.318468
184.935	0.39871	0.47207	0.235252	0.35206	0.309471	0.489527	0.145936	0.246302	0.261477	0.316407	0.13522	0.526902	0.303936	0.498927	0.463974	0.203068	0.230656	0.616565	0.790459	0.653333	0.927322	0.74588	0.846988	0.579397	0.734049	0.621289	0.790449	0.531112	0.919289	0.639897	0.84334	0.811964	0.55858	0.381465	0.433134	0.656497	0.574856	0.346037	0.384002	0.456336	0.47698	0.476928	0.317624	0.328098	0.386899	0.664302	0.420433	0.423871	0.295824
189.943	0.308499	0.468996	0.280147	0.477551	0.359938	0.518793	0.094309	0.261637	0.231802	0.360097	0.222045	0.515402	0.317397	0.445801	0.427278	0.278839	0.248547	0.696715	0.861595	0.557354	1	0.923724	0.890676	0.623943	0.780698	0.643784	0.844752	0.465398	0.752207	0.624861	0.827775	0.881943	0.567275	0.461449	0.558877	0.527733	0.581768	0.432788	0.382667	0.519677	0.533152	0.468343	0.479127	0.382408	0.400369	0.610842	0.413939	0.353864	0.226049
194.9	0.384832	0.437636	0.190329	0.404882	0.454207	0.488814	0.125795	0.288052	0.231801	0.338845	0.181112	0.572745	0.343931	0.497072	0.332564	0.291227	0.194503	0.706474	0.90001	0.616314	1	0.852022	0.681767	0.561971	0.775708	0.590405	0.793351	0.503201	0.807156	0.720313	0.777225	0.826647	0.600802	0.483023	0.546765	0.836517	0.534689	0.35767	0.473014	0.502803	0.491851	0.411965	0.333502	0.457174	0.489837	0.641916	0.467035	0.387525	0.3908
199.908	0.358808	0.518049	0.263104	0.540495	0.395096	0.453597	0.199426	0.251078	0.333843	0.305496	0.186378	0.571407	0.323309	0.448266	0.363014	0.281198	0.223795	0.634794	0.780426	0.677868	1	0.887858	0.680637	0.674518	0.755325	0.718355	0.813683	0.478706	0.769852	0.62514	0.931645	0.934008	0.642468	0.573381	0.51165	0.812006	0.59539	0.428703	0.547464	0.502378	0.432199	0.531262	0.425414	0.481235	0.467507	0.599942	0.487985	0.438259	0.510925
204.917	0.404704	0.44663	0.31825	0.468258	0.451298	0.423817	0.261393	0.32145	0.295513	0.280337	0.196069	0.526011	0.263192	0.529918	0.40794	0.184649	0.25345	0.650205	0.834681	0.670324	0.94441	0.917816	0.825975	0.670076	0.805456	0.603512	0.812213	0.472126	0.888674	0.699073	0.870973	0.866182	0.586191	0.529967	0.539359	1	0.570345	0.474558	0.430583	0.507066	0.506638	0.447504	0.434771	0.528385	0.489358	0.645443	0.495489	0.461075	0.41518
209.926	0.348533	0.500182	0.280516	0.462908	0.437727	0.565895	0.23444	0.267033	0.292293	0.327521	0.180117	0.499588	0.358257	0.504765	0.376137	0.256273	0.228101	0.716266	0.953418	0.753295	1	0.917807	0.839233	0.62455	0.877947	0.582899	0.874545	0.532248	0.833288	0.630078	0.781695	0.772954	0.613903	0.56848	0.481839	1	0.592255	0.40549	0.623889	0.513939	0.465714	0.443653	0.424962	0.435002	0.481545	0.62244	0.446195	0.47489	0.405792
214.934	0.386111	0.553581	0.202891	0.580093	0.456784	0.534989	0.129391	0.295259	0.31632	0.322352	0.167182	0.533652	0.306282	0.55847	0.383702	0.291279	0.256405	0.743863	0.954913	0.718213	1	0.944636	0.895583	0.600533	0.799533	0.691023	0.850894	0.499092	0.811325	0.654956	0.997167	0.849712	0.700027	0.55507	0.474899	1	0.500441	0.449967	0.460161	0.448393	0.471279	0.480177	0.438146	0.383275	0.491766	0.625249	0.525624	0.531683	0.435074
219.943	0.392663	0.53269	0.292155	0.460589	0.462014	0.557455	0.11553	0.300394	0.353395	0.365255	0.133541	0.658608	0.349823	0.508113	0.308171	0.27348	0.241529	0.680223	0.895066	0.783522	1	0.886578	0.920122	0.670007	0.725868	0.520885	0.9086	0.507355	0.907081	0.770231	0.954444	0.784706	0.562081	0.541164	0.512815	0.736921	0.578773	0.483112	0.461667	0.455482	0.568291	0.61471	0.333758	0.498176	0.516588	0.670251	0.363556	0.463308	0.394003
224.952	0.356655	0.503456	0.254555	0.483766	0.523142	0.509518	0.271345	0.275891	0.301341	0.329318	0.247616	0.633009	0.31575	0.528069	0.365766	0.270396	0.251029	0.680548	0.960377	0.653465	0.99281	0.925735	0.788357	0.741118	0.73678	0.647142	0.852314	0.587071	0.85153	0.62886	0.972083	0.870627	0.63496	0.61815	0.586932	0.998845	0.656445	0.422558	0.545212	0.477537	0.458805	0.463385	0.492237	0.52111	0.571729	0.659627	0.375793	0.500726	0.477647
229.909	0.363029	0.503847	0.297868	0.449125	0.587299	0.526067	0.156894	0.264278	0.307988	0.356884	0.166629	0.607172	0.3211	0.518432	0.339836	0.19881	0.293336	0.561562	0.855545	0.754284	1	0.916876	0.824087	0.743715	0.641872	0.720971	0.894583	0.571202	0.856086	0.635081	0.860332	0.848046	0.664876	0.45353	0.550731	0.705562	0.62149	0.490593	0.536174	0.509489	0.586543	0.498212	0.554105	0.55417	0.536085	0.692961	0.446755	0.581551	0.392536
234.917	0.437255	0.487811	0.274787	0.560103	0.527279	0.510908	0.177395	0.326614	0.344994	0.4158	0.268645	0.490477	0.323351	0.623008	0.367773	0.275555	0.205207	0.617731	0.903387	0.706694	1	0.906157	0.803409	0.692738	0.744024	0.711546	0.931688	0.602078	0.827575	0.666361	0.901223	0.829732	0.602616	0.61077	0.55494	0.729549	0.607371	0.458278	0.539948	0.4819	0.474507	0.437999	0.567498	0.563231	0.586468	0.705295	0.546661	0.522831	0.500516
239.926	0.407896	0.557081	0.280222	0.544866	0.510209	0.604426	0.211629	0.278227	0.371225	0.4092	0.243381	0.562892	0.360057	0.587228	0.378357	0.245433	0.237268	0.720558	0.902319	0.64773	1	0.960527	0.893643	0.61809	0.826406	0.685861	0.835091	0.610399	0.816959	0.760485	0.883809	0.856419	0.660379	0.618496	0.476453	0.502084	0.572939	0.463628	0.554422	0.431312	0.495297	0.617488	0.602416	0.53672	0.477522	0.691553	0.526562	0.594788	0.347133
244.933	0.44338	0.464924	0.285685	0.478139	0.546959	0.483893	0.170277	0.235183	0.320003	0.408447	0.220576	0.606423	0.321992	0.553832	0.363925	0.204191	0.264023	0.772228	0.887313	0.632061	0.910253	0.909713	0.829634	0.682888	0.779322	0.688986	0.911567	0.561727	0.837301	0.649748	0.95024	0.885202	0.582058	0.551188	0.507678	1	0.542127	0.476015	0.499363	0.47779	0.452121	0.535543	0.404838	0.510194	0.518553	0.734167	0.519726	0.51153	0.305432
249.942	0.513976	0.500025	0.23858	0.565549	0.509576	0.514945	0.244836	0.306112	0.381687	0.394457	0.236835	0.585832	0.367776	0.624952	0.403179	0.302371	0.305948	0.695236	0.803569	0.862377	1	1	0.722837	0.66491	0.722207	0.679311	0.785015	0.551419	0.899924	0.781777	0.929212	0.958917	0.682491	0.601109	0.527545	0.933588	0.687754	0.38395	0.696115	0.543637	0.411401	0.483691	0.453442	0.580153	0.61267	0.671821	0.500847	0.586293	0.341226
254.951	0.42662	0.533745	0.357073	0.569778	0.458091	0.496404	0.384542	0.293734	0.373266	0.30039	0.198931	0.591708	0.342199	0.589336	0.331889	0.222946	0.261026	0.795916	0.936737	0.842822	1	0.9897	0.800832	0.69319	0.755582	0.778483	0.769633	0.537813	0.949998	0.681659	0.966009	0.912692	0.689297	0.707715	0.535041	0.476614	0.605295	0.43064	0.55941	0.52319	0.472702	0.526894	0.447108	0.57292	0.524321	0.723282	0.496575	0.680606	0.322596
259.908	0.468708	0.46197	0.290651	0.571091	0.547088	0.534477	0.318022	0.356401	0.369229	0.407649	0.232106	0.628382	0.371824	0.641472	0.417445	0.21207	0.260195	0.741908	0.911195	0.734857	1	1	0.827388	0.713581	0.797708	0.800145	0.858991	0.61538	0.959814	0.753178	0.968102	0.815399	0.640531	0.591855	0.510347	0.889814	0.686292	0.460669	0.675711	0.553647	0.397313	0.528297	0.486911	0.582121	0.572623	0.72066	0.507201	0.6712	0.364278
264.916	0.461248	0.457998	0.240926	0.580103	0.485094	0.607023	0.181849	0.356967	0.324556	0.394466	0.247195	0.597598	0.337488	0.58929	0.386832	0.250543	0.280365	0.713576	0.824616	0.72274	1	0.865627	0.718082	0.803433	0.829461	0.693312	0.887045	0.522287	0.923156	0.736146	0.979102	0.867408	0.672128	0.697392	0.555715	0.674526	0.633348	0.539724	0.628296	0.54407	0.57578	0.493593	0.466958	0.52102	0.58966	0.776503	0.477319	0.723303	0.287258
269.925	0.527632	0.558766	0.242727	0.580105	0.540861	0.457503	0.265853	0.346965	0.375525	0.37091	0.245149	0.632418	0.362666	0.677137	0.418294	0.204346	0.188016	0.797034	0.865967	0.927058	1	0.909823	0.79508	0.71191	0.771002	0.728978	0.916605	0.643826	0.851886	0.722973	1	0.791922	0.586626	0.698358	0.597304	0.578909	0.515426	0.429552	0.511509	0.53653	0.476963	0.476181	0.611378	0.577779	0.58957	0.751079	0.599424	0.597743	0.428985
274.934	0.517415	0.475656	0.306207	0.573495	0.572816	0.581469	0.253286	0.320808	0.304306	0.328736	0.242588	0.633073	0.382004	0.607202	0.365826	0.356102	0.276141	0.697448	1	0.771545	1	0.976253	0.880877	0.740728	0.863946	0.658819	0.824117	0.601454	0.955636	0.713429	0.971672	0.81728	0.681928	0.665479	0.558626	1	0.655695	0.53495	0.562788	0.528801	0.506577	0.590466	0.570292	0.575143	0.52203	0.754682	0.52742	0.552126	0.39992
279.942	0.57403	0.552213	0.312006	0.569682	0.569066	0.552689	0.251292	0.353837	0.309451	0.408794	0.256608	0.593276	0.409979	0.577839	0.386336	0.301285	0.242702	0.740798	0.901793	0.762687	1	0.9993	0.745205	0.734847	0.833121	0.73159	0.905285	0.668093	0.896558	0.733519	1	0.795665	0.595069	0.647779	0.596188	0.874681	0.602975	0.499665	0.614249	0.578858	0.478832	0.57216	0.492035	0.670379	0.594935	0.712616	0.520309	0.651266	0.552325
284.951	0.574959	0.534675	0.232098	0.618364	0.598623	0.506851	0.199969	0.374417	0.380096	0.36358	0.269911	0.625839	0.326345	0.686755	0.429477	0.258658	0.232428	0.778586	0.895263	0.743415	1	0.957058	0.894132	0.787385	0.819493	0.714814	0.899296	0.564049	0.842941	0.739424	0.94643	0.903033	0.571991	0.709586	0.556413	0.490411	0.573079	0.582606	0.518904	0.617089	0.577262	0.468753	0.667812	0.622866	0.648344	0.786545	0.509522	0.585884	0.469782
289.96	0.503652	0.466248	0.305992	0.507365	0.545457	0.547704	0.210477	0.327693	0.32783	0.477576	0.274262	0.613915	0.355083	0.631757	0.407754	0.368596	0.253022	0.825969	0.862441	0.742333	1	1	0.871587	0.681198	0.809487	0.702149	0.846124	0.598781	0.94989	0.754113	0.967862	0.892563	0.6925	0.702827	0.559479	0.490652	0.695723	0.512429	0.611456	0.577878	0.572359	0.591211	0.514374	0.641464	0.591105	0.76378	0.540793	0.670872	0.449414
294.917	0.506667	0.534974	0.337487	0.590531	0.478755	0.475351	0.171063	0.311737	0.352488	0.413966	0.192631	0.562421	0.356373	0.525087	0.38285	0.302735	0.333659	0.775554	0.924127	0.785864	1	0.922149	0.788164	0.705034	0.845224	0.777427	0.877843	0.69643	0.929763	0.767865	0.946259	0.932567	0.641682	0.60933	0.462526	0.93662	0.649811	0.444898	0.534743	0.644817	0.536572	0.546514	0.540695	0.600348	0.580073	0.754011	0.561849	0.550183	0.393393
299.924	0.450822	0.551217	0.341373	0.638351	0.591609	0.4336	0.290521	0.33868	0.309909	0.442769	0.192996	0.550668	0.35351	0.600555	0.441313	0.295205	0.254384	0.784965	0.91704	0.78583	1	1	0.838626	0.769919	0.807244	0.6957	0.903721	0.648304	0.935255	0.672589	0.954235	0.893148	0.684192	0.741136	0.604807	0.717613	0.664441	0.48396	0.511904	0.59161	0.568109	0.543849	0.592221	0.581636	0.648371	0.710277	0.523907	0.561624	0.39127
304.933	0.462873	0.458798	0.340807	0.515477	0.6012	0.593932	0.217991	0.362667	0.31841	0.388147	0.238245	0.618604	0.447705	0.689314	0.381342	0.312341	0.272815	0.75169	1	0.7795	1	0.951927	0.978277	0.683618	0.786101	0.773653	0.880185	0.572392	0.868436	0.837077	0.962647	0.895073	0.742709	0.650776	0.543747	0.490464	0.473254	0.529377	0.7302	0.521193	0.619789	0.506289	0.474932	0.640954	0.59583	0.755184	0.637322	0.636203	0.418584
309.941	0.487039	0.585802	0.320915	0.56826	0.6377	0.544948	0.260067	0.398088	0.34598	0.411518	0.249927	0.748948	0.457606	0.703628	0.469096	0.326415	0.319416	0.817575	0.882521	0.74021	1	0.9413	0.970525	0.729906	0.867952	0.696097	0.896807	0.576184	0.847565	0.769207	0.942602	0.807922	0.720727	0.75865	0.56245	0.933317	0.567322	0.454479	0.711451	0.544773	0.58291	0.55735	0.526912	0.643658	0.637334	0.79928	0.668932	0.641737	0.38137
314.95	0.54088	0.54467	0.36246	0.52415	0.667943	0.500815	0.277595	0.34352	0.344343	0.395036	0.263583	0.661754	0.379797	0.635167	0.399359	0.365893	0.316455	0.740092	1	0.618009	1	1	0.822959	0.68128	0.850499	0.710357	0.897877	0.60485	0.955759	0.85457	0.907823	0.859577	0.792587	0.775622	0.550295	0.415763	0.599094	0.554335	0.713304	0.580961	0.59486	0.592129	0.567152	0.610394	0.661676	0.754505	0.527953	0.63275	0.465205
319.959	0.509699	0.589579	0.279518	0.588358	0.586451	0.526503	0.236242	0.451176	0.353057	0.38418	0.244472	0.605669	0.383241	0.675291	0.422872	0.363454	0.292376	0.707374	0.995814	0.722131	1	1	0.944729	0.691566	0.911503	0.817196	0.876405	0.587258	0.968533	0.797767	1	0.808724	0.794306	0.735686	0.570573	0.939769	0.637344	0.474102	0.600106	0.594736	0.613326	0.619555	0.501082	0.600612	0.64767	0.759861	0.557418	0.626178	0.405811
324.916	0.512441	0.496219	0.304754	0.572248	0.577607	0.609228	0.256088	0.386386	0.307017	0.448546	0.267433	0.595045	0.429972	0.656928	0.415162	0.308076	0.275686	0.753947	0.917407	0.776566	1	1	0.939526	0.690984	0.877632	0.604045	0.887612	0.606894	0.821934	0.786699	0.870459	0.859128	0.817233	0.625238	0.592448	0.646162	0.558892	0.54157	0.697817	0.572422	0.650283	0.539146	0.542026	0.607289	0.615523	0.713872	0.595548	0.733344	0.516485
329.924	0.595547	0.559687	0.364755	0.596277	0.631916	0.681569	0.178501	0.394684	0.329893	0.466281	0.212124	0.679106	0.419723	0.631425	0.4657	0.272685	0.344242	0.793948	0.987993	0.751407	1	0.984582	0.897787	0.889167	0.842869	0.731432	0.805241	0.582299	0.898133	0.824006	0.962382	0.858998	0.835048	0.622246	0.599361	0.492011	0.563701	0.55206	0.565722	0.551448	0.606787	0.606444	0.516624	0.649023	0.628002	0.767794	0.520518	0.680619	0.375449
334.933	0.553055	0.591865	0.337863	0.609926	0.557445	0.594432	0.270334	0.359313	0.342116	0.45748	0.247328	0.682941	0.432791	0.602568	0.510863	0.362661	0.304503	0.820664	1	0.869325	1	0.956876	0.890616	0.754901	0.866379	0.611702	0.957557	0.651363	0.954119	0.845931	0.903748	0.883129	0.760212	0.733095	0.565399	0.716743	0.610182	0.518686	0.659883	0.596083	0.655048	0.563385	0.668819	0.662828	0.723306	0.779308	0.547738	0.537477	0.500212
339.942	0.574421	0.54948	0.291743	0.59027	0.649634	0.614527	0.251288	0.430541	0.301763	0.515689	0.218578	0.610211	0.403458	0.664758	0.444544	0.251008	0.237002	0.926016	0.987427	0.787844	1	1	0.806483	0.69053	0.870945	0.740061	0.87271	0.694688	0.982033	0.825873	0.897198	0.952669	0.789432	0.811178	0.567721	0.643737	0.638435	0.472175	0.643484	0.545685	0.739689	0.620789	0.709361	0.681862	0.634645	0.816521	0.531494	0.529483	0.505754
344.95	0.546202	0.516983	0.325349	0.57715	0.635932	0.544899	0.232464	0.343637	0.367391	0.474319	0.230113	0.682301	0.390615	0.698842	0.475522	0.346581	0.287931	0.902065	1	0.805304	1	0.945548	0.792234	0.877435	0.877359	0.719282	0.874913	0.640226	0.912025	0.801998	0.905302	0.968798	0.723716	0.757852	0.5878	1	0.613967	0.429643	0.673968	0.566775	0.521872	0.607922	0.715391	0.670912	0.607409	0.783813	0.66766	0.527725	0.465746
349.959	0.568007	0.50714	0.334872	0.605382	0.660621	0.532136	0.178582	0.335497	0.318179	0.454424	0.23589	0.691341	0.416719	0.63207	0.41778	0.350669	0.303142	0.830703	0.90427	0.850309	1	1	0.75584	0.779924	0.802908	0.819629	0.877888	0.637343	1	0.750134	0.850323	0.947196	0.70424	0.657678	0.636572	0.241936	0.640434	0.551101	0.586961	0.554637	0.680051	0.686488	0.565135	0.762812	0.595725	0.804126	0.582122	0.683634	0.416621
354.967	0.513753	0.520722	0.300873	0.655884	0.591857	0.546066	0.229099	0.419611	0.284653	0.42374	0.265946	0.687213	0.480755	0.523317	0.558805	0.349457	0.29916	0.802823	1	0.798607	1	0.972508	0.960188	0.756245	0.973294	0.777598	0.941867	0.628388	0.995488	0.86785	0.928751	0.967864	0.724735	0.734308	0.695613	1	0.586746	0.487402	0.556474	0.482686	0.672361	0.648538	0.485258	0.685745	0.680602	0.860421	0.633065	0.59721	0.376213
359.976	0.527637	0.607013	0.301846	0.647409	0.672376	0.566738	0.272423	0.365245	0.343133	0.417455	0.30628	0.632324	0.390221	0.626734	0.481786	0.298697	0.329858	0.828803	1	0.832519	1	1	0.885053	0.774638	0.812055	0.836581	0.954513	0.722359	0.916119	0.839921	0.985535	0.983207	0.780628	0.795013	0.676704	0.954404	0.590986	0.479355	0.69096	0.509336	0.649304	0.605519	0.554281	0.673297	0.706223	0.818205	0.579916	0.587403	0.460547
364.932	0.488249	0.541573	0.314614	0.590532	0.63956	0.616844	0.244657	0.419719	0.321285	0.48259	0.344016	0.76262	0.435844	0.607219	0.480321	0.358119	0.311662	0.757429	0.974318	0.852609	1	1	0.913521	0.829937	0.900964	0.768533	1	0.675572	1	0.781594	0.884572	1	0.786943	0.68026	0.599247	0.890026	0.493579	0.511121	0.73308	0.549357	0.639222	0.623283	0.6075	0.726237	0.749972	0.829261	0.735305	0.586954	0.447016
369.94	0.530409	0.549531	0.387041	0.638011	0.597915	0.524654	0.23402	0.444101	0.349252	0.424781	0.276673	0.752292	0.43042	0.622337	0.489208	0.380835	0.276217	0.800874	0.989034	0.80291	1	1	0.957692	0.882648	0.946425	0.773617	0.866786	0.773293	0.946156	0.820259	0.981815	0.951497	0.739922	0.81305	0.67443	1	0.594815	0.515907	0.618336	0.564292	0.609611	0.698578	0.574378	0.678827	0.751239	0.769503	0.659793	0.5907	0.531778
374.949	0.558582	0.62958	0.330211	0.717901	0.599721	0.512225	0.266751	0.386234	0.387539	0.361495	0.180377	0.734984	0.443476	0.564997	0.526809	0.332799	0.32902	0.83792	1	0.925454	0.974209	1	0.873364	0.839636	0.841708	0.744546	0.966763	0.681278	0.951251	0.785674	0.87922	0.9467	0.747812	0.746018	0.651716	1	0.616101	0.494203	0.551903	0.551874	0.694067	0.772618	0.592347	0.648367	0.736788	0.85366	0.716466	0.684895	0.575732
379.958	0.552671	0.467036	0.424187	0.578019	0.668383	0.482217	0.259351	0.422438	0.348829	0.423905	0.285925	0.773658	0.412353	0.692766	0.47054	0.286637	0.280951	0.848385	1	0.823442	1	0.986765	1	0.832637	0.950545	0.88576	0.941849	0.642828	0.964839	0.753848	1	0.941381	0.754507	0.677299	0.706301	0.69721	0.592	0.574528	0.554371	0.560207	0.583497	0.745348	0.451995	0.751675	0.645149	0.807683	0.695335	0.831696	0.568268
384.966	0.542555	0.527068	0.3869	0.560826	0.70591	0.590623	0.30897	0.420163	0.410993	0.439841	0.227534	0.717509	0.455808	0.668337	0.549603	0.465633	0.311202	0.748414	1	0.759443	1	1	0.938165	0.847218	0.874369	0.824361	0.880001	0.655839	0.988162	0.767662	0.979638	0.973661	0.718756	0.683701	0.680341	1	0.648467	0.531438	0.560399	0.575992	0.715451	0.644265	0.564963	0.7623	0.672556	0.845527	0.663783	0.663421	0.554868
389.975	0.672854	0.505669	0.359233	0.579538	0.582445	0.483684	0.246621	0.358004	0.40053	0.483804	0.299439	0.728527	0.36242	0.655134	0.537121	0.258548	0.27435	0.856909	0.996296	0.862946	1	0.970273	0.88395	0.866696	0.856915	0.796696	1	0.748278	0.870587	0.846113	0.910693	0.999475	0.662397	0.686552	0.692344	0.857177	0.665579	0.46896	0.729965	0.597883	0.616697	0.642473	0.500999	0.787672	0.727375	0.824461	0.719671	0.707265	0.43972
394.932	0.516182	0.590838	0.360083	0.605933	0.616998	0.636712	0.261086	0.367614	0.427707	0.440305	0.282473	0.679066	0.409151	0.694146	0.495999	0.200478	0.297033	0.794905	1	0.902488	1	1	0.869032	0.890907	0.882974	1	1	0.608588	0.92771	0.735203	0.854241	0.970314	0.833197	0.831916	0.66897	0.987792	0.642077	0.548682	0.587677	0.592502	0.714187	0.751559	0.604116	0.709532	0.734496	0.83007	0.65395	0.63663	0.466929
399.941	0.621511	0.487765	0.367904	0.678291	0.642427	0.64989	0.412606	0.41133	0.456246	0.532948	0.302081	0.643408	0.365433	0.653408	0.523162	0.326024	0.319144	0.924769	1	0.812613	1	1	0.950279	0.894163	0.850829	0.984478	0.94447	0.638559	0.973588	0.875871	1	0.954492	0.699854	0.715429	0.694557	0.593916	0.585865	0.506438	0.6525	0.595114	0.65724	0.727887	0.506771	0.673194	0.743122	0.840107	0.790567	0.697829	0.463037
404.95	0.598605	0.581113	0.365977	0.659803	0.614223	0.551846	0.319019	0.385545	0.450827	0.494393	0.199686	0.658345	0.389672	0.675581	0.605043	0.337136	0.286837	0.809623	1	0.851181	1	1	0.952158	0.785853	0.855564	0.807884	0.865073	0.775619	0.931541	0.772685	0.987195	0.933252	0.771064	0.661372	0.699612	1	0.587087	0.544244	0.611543	0.531223	0.780283	0.718818	0.573559	0.762883	0.821776	0.757539	0.70423	0.694124	0.579309
409.958	0.546123	0.446212	0.413123	0.740825	0.650139	0.586064	0.304174	0.385455	0.518744	0.445621	0.309529	0.634531	0.403888	0.671205	0.491521	0.372646	0.303811	0.793714	0.913464	0.85488	1	0.975182	0.780836	0.712641	0.824619	0.852674	1	0.765717	0.917243	0.87395	0.972738	0.952651	0.818755	0.74095	0.690761	0.955105	0.662508	0.397702	0.670561	0.527363	0.632782	0.749748	0.594494	0.659441	0.7454	0.781786	0.625798	0.733752	0.629301
414.967	0.535905	0.680348	0.395927	0.697762	0.631991	0.627451	0.330788	0.382992	0.474207	0.433251	0.264026	0.641328	0.375348	0.654394	0.467622	0.370056	0.303272	0.860553	1	0.922124	1	0.974126	0.900942	0.929751	0.982175	0.898706	0.921495	0.7429	0.864182	0.816726	0.879881	0.984915	0.857685	0.648974	0.630188	1	0.536526	0.473834	0.557177	0.540049	0.673577	0.72739	0.590654	0.747542	0.798225	0.907157	0.667156	0.764828	0.401288
419.974	0.531842	0.609643	0.419726	0.735384	0.641669	0.629937	0.345308	0.360532	0.470025	0.522101	0.242651	0.645388	0.404412	0.720559	0.510299	0.290091	0.317047	0.829204	0.982724	0.654153	1	1	0.820043	0.91011	0.769657	0.89182	0.992706	0.685051	0.852261	0.818401	0.916506	1	0.760409	0.696539	0.665489	0.992787	0.671479	0.45984	0.865082	0.527903	0.618959	0.766217	0.601288	0.862676	0.829715	0.823445	0.62679	0.734343	0.405473
424.983	0.53274	0.524722	0.414429	0.711294	0.530452	0.64645	0.266884	0.347496	0.487496	0.389486	0.348202	0.60193	0.473311	0.743765	0.523263	0.34818	0.28446	0.814274	1	0.833405	1	0.921257	0.780834	0.8497	0.842326	0.846189	0.933822	0.721262	0.883257	0.86268	1	1	0.774328	0.818178	0.752329	0.503311	0.69835	0.517501	0.630783	0.550381	0.645001	0.726804	0.481606	0.773901	0.710965	0.857887	0.692517	0.800118	0.608844
429.94	0.510361	0.591223	0.384178	0.637068	0.67475	0.618942	0.351137	0.370403	0.529384	0.456639	0.314394	0.645912	0.439657	0.795432	0.545949	0.354593	0.34355	0.772874	1	0.935856	1	1	0.883466	0.855679	0.785234	0.768731	0.837628	0.780605	0.968621	0.799432	0.942058	1	0.767806	0.713642	0.755907	0.894231	0.59017	0.471891	0.59961	0.550122	0.659639	0.753319	0.628718	0.718574	0.711117	0.830134	0.668762	0.68084	0.449154
434.948	0.521171	0.580544	0.35915	0.67973	0.667548	0.665432	0.256451	0.424016	0.42139	0.3965	0.265253	0.681524	0.386096	0.77927	0.526255	0.338885	0.286023	0.872493	0.9407	0.882191	1	1	0.907914	0.776649	0.884765	0.849831	0.862678	0.678923	1	0.836461	0.911562	1	0.910209	0.692456	0.651691	0.960464	0.637773	0.472626	0.695267	0.528074	0.638894	0.658412	0.604665	0.791421	0.785429	0.864037	0.704015	0.678584	0.547721
439.957	0.563199	0.573525	0.372201	0.770073	0.5549	0.690298	0.308515	0.413486	0.437694	0.449089	0.244835	0.526156	0.374778	0.785032	0.567371	0.252402	0.233729	0.745172	1	0.856725	1	1	0.932945	0.876943	0.950257	0.958485	1	0.720646	0.931061	0.879434	0.926355	1	0.83285	0.766191	0.734337	0.908019	0.610363	0.642177	0.754964	0.600901	0.644241	0.692309	0.603351	0.731921	0.819275	0.832668	0.788155	0.759901	0.481304
444.966	0.54006	0.587501	0.387249	0.753682	0.732363	0.610283	0.297133	0.38426	0.447509	0.439635	0.224299	0.626443	0.418513	0.835865	0.611528	0.29134	0.304106	0.75551	0.94219	0.80344	1	1	0.819007	0.829941	0.793961	1	1	0.67088	0.884762	0.831921	0.922198	0.960449	0.833384	0.742506	0.640244	0.621771	0.585431	0.469155	0.761337	0.567253	0.594959	0.722858	0.558994	0.771706	0.811399	0.827351	0.641931	0.742999	0.469435
449.974	0.491372	0.607351	0.358222	0.769189	0.687133	0.701589	0.307195	0.43334	0.542427	0.501702	0.348348	0.740486	0.468903	0.765841	0.537454	0.302469	0.285635	0.774522	0.981815	0.919151	1	1	0.906513	0.86148	0.922315	0.853563	0.897983	0.676781	1	0.862724	1	0.910613	0.761277	0.687557	0.696036	1	0.632248	0.554908	0.762338	0.642407	0.676685	0.733444	0.664707	0.816125	0.744978	0.768912	0.739695	0.71004	0.631559
454.983	0.455252	0.582203	0.380605	0.742614	0.730028	0.63843	0.29441	0.347326	0.439656	0.506284	0.332174	0.678458	0.443995	0.766385	0.618946	0.263663	0.273799	0.71146	0.894233	0.88369	1	1	1	0.964867	0.957838	0.888148	0.916872	0.767388	0.897619	0.891675	0.938608	1	0.728428	0.8124	0.717543	0.867547	0.672641	0.542499	0.703954	0.538912	0.567147	0.798235	0.582767	0.780385	0.67984	0.79651	0.666606	0.690979	0.563216
459.94	0.481044	0.581003	0.444162	0.652653	0.652421	0.591045	0.17677	0.406695	0.494956	0.466234	0.321295	0.657921	0.444514	0.736457	0.556914	0.27785	0.314959	0.840235	0.912551	0.871921	1	1	0.940717	0.856081	0.880785	0.869333	1	0.674445	0.986213	0.796849	1	0.903902	0.823399	0.676962	0.702386	1	0.711131	0.512614	0.733854	0.573289	0.558451	0.752303	0.573896	0.788137	0.753532	0.81539	0.690095	0.681745	0.686432
464.949	0.513017	0.481612	0.338058	0.618402	0.641093	0.586769	0.240817	0.392278	0.479195	0.496352	0.241685	0.656646	0.440065	0.733938	0.594117	0.301821	0.269988	0.803853	1	0.802203	1	0.91657	0.859224	0.817269	0.933287	0.957252	1	0.65205	1	0.771454	0.966648	0.91766	0.7745	0.793842	0.731482	1	0.723628	0.405383	0.54157	0.546091	0.560599	0.838968	0.61777	0.701131	0.816953	0.854973	0.579778	0.610372	0.597991
469.957	0.529511	0.649739	0.419832	0.781067	0.590454	0.653007	0.203725	0.436334	0.464086	0.494206	0.341987	0.735839	0.416589	0.715848	0.594432	0.308436	0.285657	0.689354	1	0.770741	1	0.93336	0.865166	0.9183	0.896928	0.898577	1	0.851834	0.90427	0.883559	1	1	0.843195	0.721828	0.707698	0.911427	0.719518	0.535594	0.690717	0.69736	0.647877	0.828614	0.729395	0.812315	0.82962	0.879243	0.661718	0.761002	0.573569
474.965	0.552157	0.677374	0.385278	0.65565	0.723431	0.723966	0.33753	0.431365	0.445729	0.507213	0.340437	0.712835	0.472282	0.724223	0.593368	0.415383	0.323268	0.803513	1	0.895002	1	0.952613	0.927077	0.895075	0.907091	0.912374	0.939128	0.806183	1	0.794863	1	1	0.90728	0.729669	0.708679	0.833901	0.712887	0.568701	0.778258	0.698547	0.63098	0.751284	0.619318	0.715554	0.745096	0.885155	0.754959	0.70242	0.643476
479.973	0.535729	0.65364	0.404408	0.681213	0.706854	0.690171	0.301883	0.382883	0.495676	0.531923	0.323821	0.714379	0.458568	0.724442	0.542011	0.394085	0.301249	0.768284	1	0.795734	1	1	0.951274	0.874048	0.9862	0.932251	1	0.811591	0.925822	0.795256	0.952901	0.997543	0.777873	0.732886	0.751803	1	0.654669	0.631261	0.624717	0.678995	0.595755	0.747699	0.708127	0.766463	0.719314	0.849115	0.668519	0.695027	0.521189
484.982	0.527573	0.700132	0.326024	0.800262	0.628844	0.695142	0.286159	0.490656	0.499339	0.482893	0.299877	0.645798	0.459848	0.733606	0.484152	0.326254	0.362966	0.803393	1	0.7668	1	1	0.939369	0.752456	0.998778	0.934042	0.948443	0.876388	1	0.886761	0.946571	0.967182	0.834302	0.742668	0.737041	1	0.646876	0.550526	0.635029	0.634153	0.574474	0.801538	0.612191	0.758039	0.800897	0.852217	0.708903	0.79392	0.486339
489.99	0.524907	0.702196	0.419158	0.701251	0.624128	0.706282	0.235428	0.432857	0.486434	0.540887	0.27651	0.764957	0.434916	0.778471	0.481911	0.321722	0.335101	0.74673	0.973057	0.818991	1	1	0.917307	0.887561	0.93926	0.981377	1	0.759027	0.952269	0.864497	0.88738	0.91613	0.83438	0.757706	0.861788	0.844602	0.736762	0.529947	0.712362	0.570574	0.618854	0.835619	0.536216	0.711245	0.711538	0.731941	0.693377	0.710018	0.568477
494.948	0.566902	0.632643	0.385361	0.842172	0.687334	0.72223	0.306393	0.412768	0.542162	0.446382	0.357821	0.688291	0.441576	0.760561	0.550372	0.32855	0.352054	0.772671	1	0.861182	1	1	0.921929	0.855636	0.943494	0.918226	1	0.786716	1	0.864584	1	0.935995	0.90685	0.851134	0.783773	1	0.693335	0.57763	0.858456	0.660119	0.580229	0.832997	0.578821	0.741007	0.733609	0.882496	0.598602	0.804844	0.531935
499.956	0.526649	0.649578	0.433461	0.782846	0.661391	0.672118	0.296419	0.406029	0.480666	0.49502	0.315852	0.730526	0.448869	0.78896	0.625478	0.367814	0.297843	0.840516	1	0.866423	1	1	0.851027	0.873953	0.890349	0.884721	1	0.788776	1	0.840158	0.950694	0.936334	0.901589	0.776797	0.692283	1	0.781537	0.529462	0.593778	0.747982	0.530787	0.75973	0.665267	0.779134	0.857252	0.887005	0.632795	0.765113	0.551603
504.965	0.543631	0.701518	0.365289	0.847002	0.68354	0.767433	0.289517	0.465856	0.456227	0.554946	0.260933	0.674348	0.398668	0.723109	0.52268	0.288569	0.315309	0.842302	0.976548	0.908722	1	0.921085	0.85408	0.842573	1	0.921818	1	0.63863	1	0.778878	1	0.918111	0.847017	0.806231	0.790527	1	0.70579	0.640224	0.761451	0.704771	0.57842	0.818748	0.571423	0.8146	0.710518	0.82236	0.60842	0.74691	0.49431
509.974	0.520131	0.719852	0.385979	0.829346	0.655793	0.696934	0.250046	0.416893	0.519615	0.480607	0.3369	0.631037	0.44372	0.683349	0.565388	0.35003	0.370834	0.831709	0.999451	0.83084	1	1	0.934258	0.826796	0.929748	0.908057	0.92811	0.729937	0.985466	0.873465	1	0.887362	0.868191	0.817735	0.724485	1	0.659882	0.546858	0.773381	0.739565	0.506835	0.702173	0.56519	0.812858	0.807348	0.84755	0.588594	0.748066	0.486903
514.982	0.564462	0.723518	0.380243	0.90075	0.586291	0.637483	0.307942	0.388687	0.42479	0.462783	0.297387	0.666952	0.398385	0.759344	0.573243	0.371895	0.330463	0.71082	0.996544	0.79922	1	1	1	0.9294	0.914928	0.856323	1	0.775279	1	0.866112	1	0.97282	0.805056	0.800507	0.754096	1	0.717556	0.698166	0.65822	0.658203	0.615016	0.781429	0.610022	0.952561	0.67351	0.866465	0.556043	0.775485	0.598944
519.991	0.630521	0.592775	0.354999	0.769679	0.689596	0.687581	0.343216	0.488912	0.505136	0.461113	0.276058	0.674283	0.44663	0.792463	0.584104	0.302098	0.32269	0.879152	0.866173	0.837818	1	1	1	0.789477	0.967677	0.964062	0.989853	0.695705	0.982132	0.897235	0.995166	0.955582	0.786397	0.692604	0.751605	1	0.682014	0.623155	0.636856	0.65809	0.601152	0.735911	0.640809	0.810518	0.695804	0.792809	0.570628	0.669211	0.629999
525	0.557382	0.487315	0.363838	0.779369	0.672382	0.784605	0.274729	0.488177	0.542786	0.417512	0.330843	0.759563	0.453237	0.74558	0.616212	0.351769	0.397225	0.825889	1	0.820642	1	1	1	0.757044	1	0.786043	0.990682	0.745415	1	0.951698	1	0.977452	0.957755	0.837797	0.738823	0.94496	0.705471	0.662353	0.760216	0.680118	0.611398	0.829074	0.536792	0.770041	0.707679	0.786967	0.568738	0.716937	0.582771
529.955	0.57887	0.602997	0.422019	0.791085	0.716791	0.777641	0.246328	0.449751	0.551295	0.544877	0.307562	0.672733	0.449895	0.67443	0.603209	0.309956	0.386066	0.770136	1	1	1	1	1	0.846584	0.93145	0.890746	0.941236	0.731295	0.971545	0.799693	0.945542	0.956861	0.829912	0.760705	0.78587	1	0.692361	0.545839	0.77297	0.608411	0.561283	0.87658	0.616823	0.795954	0.740425	0.924808	0.660436	0.739822	0.647811
534.964	0.644815	0.711029	0.370467	0.744169	0.701125	0.74768	0.293431	0.477138	0.480442	0.49579	0.31114	0.691056	0.453864	0.726336	0.55252	0.333122	0.38417	0.805539	0.987408	0.91841	1	1	1	0.808546	0.945414	0.872978	1	0.72688	1	0.820482	0.964087	0.975572	0.817227	0.855329	0.818113	1	0.828938	0.566176	0.638474	0.627111	0.695723	0.650452	0.736436	0.802037	0.781652	0.898878	0.687218	0.838626	0.587051
539.972	0.590885	0.727751	0.405621	0.845747	0.699812	0.854435	0.322029	0.488314	0.521618	0.562104	0.275676	0.648262	0.477682	0.709875	0.59209	0.396124	0.321475	0.827027	0.963821	0.96317	1	1	0.997715	0.919185	1	0.936606	1	0.870511	1	0.856427	0.95648	1	0.919573	0.93085	0.821705	1	0.704047	0.611591	0.676501	0.685446	0.783866	0.759939	0.636871	0.8711	0.741331	0.858697	0.603829	0.745839	0.607259
544.981	0.55885	0.686141	0.476974	0.791109	0.645334	0.812925	0.318355	0.504873	0.502011	0.464513	0.333157	0.734353	0.430391	0.797177	0.65523	0.396601	0.375448	0.820089	1	0.853362	1	1	0.991081	0.911018	0.99405	0.958319	1	0.79916	0.95981	0.841502	1	0.903651	0.88784	0.82286	0.809713	0.93054	0.627699	0.740333	0.748784	0.76047	0.69495	0.818034	0.703307	0.785298	0.788399	0.896461	0.735529	0.755758	0.664372
549.99	0.526229	0.639809	0.389202	0.929445	0.720801	0.692739	0.299014	0.475314	0.548423	0.512433	0.274888	0.664728	0.44509	0.789399	0.614592	0.306502	0.326664	0.873517	0.907664	0.945763	1	1	0.944812	0.837875	1	0.898572	0.969696	0.890213	1	0.802405	0.91734	0.953493	0.898252	0.849962	0.752031	1	0.724641	0.580057	0.819299	0.658767	0.643345	0.827019	0.574199	0.726327	0.821074	0.916011	0.693127	0.629072	0.619786
554.999	0.559577	0.610606	0.429196	0.819172	0.662754	0.736168	0.224822	0.445562	0.57626	0.527552	0.264298	0.766787	0.464574	0.72565	0.605758	0.381442	0.434708	0.878343	0.900112	0.920067	1	1	1	0.914833	0.997792	0.964882	1	0.754269	1	0.843565	1	0.9752	0.832871	0.758244	0.732341	1	0.67775	0.592578	0.793869	0.717	0.743672	0.866684	0.642438	0.713323	0.725797	0.978107	0.663113	0.797992	0.566332
560.007	0.537889	0.646404	0.452709	0.745434	0.654729	0.819964	0.234133	0.49393	0.466611	0.581099	0.295963	0.734757	0.457253	0.769454	0.631766	0.366138	0.364319	0.79501	0.825219	0.970686	1	1	1	0.832031	1	1	0.992481	0.784971	1	1	0.98395	1	0.817742	0.801476	0.797688	1	0.720681	0.585365	0.783087	0.654461	0.775118	0.875265	0.608349	0.929374	0.668869	0.921033	0.658346	0.690422	0.621317
564.964	0.622748	0.678204	0.443852	0.833421	0.724238	0.880997	0.29019	0.486866	0.507252	0.521848	0.258052	0.761075	0.441745	0.666089	0.628714	0.353922	0.394806	0.834663	0.927315	0.82042	1	1	1	0.915494	1	0.977364	1	0.696163	1	0.814609	1	0.987407	0.833297	0.799478	0.837664	1	0.661743	0.574488	0.747959	0.730588	0.756368	0.872657	0.600945	0.847624	0.829148	0.907211	0.751192	0.824642	0.71257
569.973	0.647615	0.581049	0.421764	0.83515	0.70742	0.787813	0.253067	0.41956	0.50088	0.491992	0.270337	0.821597	0.480636	0.822266	0.666556	0.330408	0.288697	0.860615	0.947246	0.851908	1	1	0.937184	0.868488	1	1	1	0.695157	1	0.817405	0.91878	0.89411	0.867151	0.799598	0.862063	1	0.656488	0.621783	0.89257	0.710082	0.825747	0.858097	0.584897	0.716105	0.739139	0.849116	0.792827	0.718297	0.627174
574.982	0.696794	0.529061	0.487937	0.888497	0.724011	0.819853	0.307667	0.546723	0.585729	0.412518	0.280621	0.765008	0.542207	0.660219	0.732712	0.408491	0.343998	0.85755	0.979016	0.842938	1	1	1	0.879945	1	1	0.987357	0.804655	1	0.889466	0.976644	0.939394	0.880205	0.893585	0.862946	1	0.707753	0.729732	0.689736	0.727197	0.822479	0.831642	0.560981	0.826002	0.751144	0.904312	0.710012	0.70901	0.573699
579.99	0.726292	0.640414	0.383817	0.856217	0.726416	0.706904	0.297273	0.457258	0.495731	0.512827	0.355523	0.867419	0.501381	0.661985	0.755886	0.346288	0.350839	0.823948	1	1	1	1	0.944973	1	1	1	1	0.774131	1	0.848776	1	0.918912	0.853592	0.791988	0.843596	1	0.619904	0.666008	0.741761	0.726199	0.857896	0.851609	0.528393	0.912761	0.773144	0.945062	0.61592	0.783196	0.59394
584.999	0.726714	0.691598	0.402859	0.768568	0.842932	0.836846	0.252491	0.436915	0.60282	0.548448	0.325627	0.813133	0.499975	0.739762	0.724311	0.402061	0.318208	0.834004	0.986937	0.93108	1	1	1	0.843661	1	0.970433	0.9629	0.686723	1	0.883761	1	0.910958	0.754466	0.842505	0.747915	1	0.742878	0.661524	0.782273	0.738575	0.78137	0.814248	0.694645	0.84735	0.777385	0.860171	0.886136	0.72866	0.715105
590.008	0.617718	0.742755	0.44211	0.874831	0.816332	0.753638	0.27268	0.491121	0.573943	0.549524	0.273218	0.849527	0.377452	0.740677	0.712162	0.403836	0.384862	0.817604	1	0.972846	1	1	1	0.992762	1	1	1	0.718083	1	0.778986	1	1	0.926587	0.944524	0.84338	1	0.674369	0.616142	0.664774	0.775056	0.730515	0.797832	0.575849	0.761934	0.70316	0.864066	0.642501	0.752829	0.557306
594.963	0.671724	0.625065	0.441066	0.959411	0.671434	0.750204	0.326918	0.536291	0.575838	0.51268	0.316151	0.84516	0.459376	0.798751	0.701316	0.35356	0.315324	0.944112	1	0.874133	1	1	0.895089	0.880466	1	0.948445	1	0.820863	1	0.863674	1	1	0.813072	0.835906	0.891838	1	0.694127	0.691912	0.731588	0.701825	0.779388	0.778661	0.725731	0.934566	0.683497	0.894257	0.673751	0.803366	0.63929
[truncated: 19 more columns]
