# Supplementary material for: ESCO1 and CTCF enable formation of long chromatin loops by protecting cohesinSTAG1 from WAPL
Source: eLife. 2020 Feb 17;9:e52091. doi: 10.7554/eLife.52091 (PMC7054000; doi:10.7554/eLife.52091)
Supplement: Figure 3—source data 2. [file elife-52091-fig3-data2.xlsx]

## Sheet: Sheet1
time (min)	control RNAi															CTCF RNAi															WAPL RNAi															CTCF/WAPL RNAi
0	1	1	1	1	1	1	1	1	1	1	1	1	1	1	1	1	1	1	1	1	1	1	1	1	1	1	1	1	1	1	1	1	1	1	1	1	1	1	1	1	1	1	1	1	1	1	1	1	1
1	0.928467	0.931902	0.950076	0.939823	0.937871	0.95045	0.957876	0.910595	0.913435	0.950944	0.953385	0.946311	0.926668	0.913036	0.939948	0.93348	0.93356	0.917591	0.972275	0.91319	0.926846	0.940816	0.923468	0.928698	0.925022	0.927861	0.928108	0.947018	0.925553	0.92339	0.965269	1.00758	0.958851	0.955245	0.976139	0.971824	0.98254	0.958076	0.973224	0.963672	0.978631	0.981984	0.990497	0.956465	1.00844	0.911095	0.967244	0.970155	0.979636
2	0.856935	0.863805	0.900152	0.879646	0.875742	0.9009	0.915752	0.821189	0.82687	0.901888	0.906769	0.892621	0.853337	0.826073	0.879895	0.86696	0.86712	0.835182	0.944549	0.82638	0.853693	0.881633	0.846936	0.857397	0.850044	0.855722	0.856216	0.894036	0.851105	0.846779	0.930537	1.01517	0.917702	0.91049	0.952278	0.943647	0.96508	0.916153	0.946448	0.927344	0.957262	0.963968	0.980995	0.912929	1.01687	0.822191	0.934488	0.94031	0.959271
3	0.787993	0.798219	0.850349	0.824747	0.813585	0.853029	0.87539	0.737503	0.744884	0.85411	0.858204	0.839449	0.823562	0.802625	0.823794	0.80318	0.802751	0.758618	0.915323	0.743924	0.785547	0.822636	0.773668	0.788718	0.779152	0.785313	0.787486	0.835694	0.777382	0.779144	0.897889	1.02782	0.878668	0.872108	0.925328	0.917714	0.945707	0.871666	0.919389	0.895447	0.935123	0.946403	0.988631	0.884506	0.980499	0.741139	0.902273	0.907983	0.940437
4	0.738666	0.751651	0.801458	0.809801	0.751211	0.816074	0.848365	0.697119	0.713275	0.820389	0.788188	0.791963	0.803565	0.793436	0.768482	0.757212	0.754059	0.720054	0.876337	0.694434	0.755319	0.765048	0.729778	0.748898	0.745032	0.730467	0.747209	0.776281	0.703804	0.713304	0.881011	1.07342	0.85339	0.87515	0.874995	0.908761	0.911857	0.807772	0.889212	0.912294	0.904513	0.933794	0.999694	0.859106	0.935163	0.719544	0.873576	0.856873	0.931548
5	0.689339	0.705083	0.752568	0.794856	0.688837	0.779119	0.82134	0.656734	0.681666	0.786667	0.718172	0.744476	0.765962	0.751225	0.73038	0.711245	0.705367	0.68149	0.837352	0.644944	0.725091	0.70746	0.685889	0.709077	0.710913	0.675621	0.706933	0.717854	0.659688	0.660963	0.864133	1.11903	0.828111	0.878191	0.824663	0.899808	0.878006	0.743878	0.859035	0.92914	0.873903	0.921185	0.97199	0.837842	0.896656	0.697949	0.84488	0.805762	0.922658
6	0.64288	0.66246	0.71075	0.776886	0.626907	0.739186	0.795864	0.616575	0.646104	0.753793	0.657215	0.702331	0.718879	0.691232	0.700882	0.668897	0.65471	0.645632	0.803685	0.603775	0.693667	0.65661	0.641927	0.669703	0.67577	0.621641	0.668524	0.65992	0.630304	0.61537	0.843479	1.13277	0.799964	0.871805	0.779014	0.887911	0.849569	0.697429	0.828474	0.937066	0.84209	0.907106	0.924903	0.818646	0.861563	0.690258	0.817796	0.768027	0.911257
7	0.605025	0.63167	0.690148	0.74984	0.566432	0.68947	0.775475	0.577154	0.590772	0.725153	0.641551	0.686892	0.676956	0.667255	0.664885	0.636505	0.598645	0.617215	0.784646	0.589942	0.658317	0.627898	0.597701	0.632861	0.635516	0.572568	0.640695	0.629134	0.593776	0.585126	0.811499	1.05092	0.763933	0.839491	0.747419	0.867179	0.838921	0.703318	0.795998	0.900388	0.804262	0.885679	0.880384	0.796419	0.857573	0.720803	0.795152	0.767076	0.892946
8	0.567171	0.60088	0.669546	0.722794	0.505957	0.639754	0.755086	0.537733	0.535441	0.696513	0.625888	0.671453	0.640549	0.679291	0.622388	0.604114	0.542581	0.588797	0.765607	0.57611	0.622967	0.599185	0.553476	0.596019	0.595261	0.523495	0.612866	0.625496	0.550566	0.569241	0.77952	0.969079	0.727901	0.807177	0.715824	0.846447	0.828273	0.709206	0.763522	0.86371	0.766434	0.864252	0.838436	0.77116	0.884686	0.751348	0.772507	0.766124	0.874635
9	0.524804	0.575273	0.643112	0.699856	0.461849	0.599237	0.737938	0.50025	0.487485	0.673769	0.606975	0.647858	0.608188	0.677967	0.58247	0.574588	0.499303	0.559282	0.742053	0.558769	0.586918	0.569571	0.512927	0.563044	0.552588	0.483162	0.585588	0.610538	0.514615	0.549889	0.759395	0.933185	0.706659	0.788631	0.683197	0.830636	0.817217	0.704486	0.734839	0.835512	0.735855	0.844599	0.805528	0.751842	0.886914	0.759422	0.761916	0.76088	0.860918
10	0.47518	0.558004	0.607932	0.683079	0.450474	0.577119	0.727272	0.466646	0.463758	0.6704	0.577383	0.597464	0.583918	0.651828	0.547341	0.549362	0.475202	0.528118	0.711726	0.534411	0.549471	0.538156	0.480311	0.542775	0.501969	0.471547	0.56012	0.574558	0.492145	0.524099	0.757055	0.966218	0.707602	0.789357	0.648505	0.824664	0.805346	0.678547	0.71862	0.83518	0.727027	0.830267	0.789412	0.743556	0.842928	0.733787	0.769408	0.748728	0.85459
11	0.425555	0.540736	0.572752	0.666302	0.439099	0.555001	0.716606	0.433042	0.440032	0.66703	0.54779	0.547071	0.559033	0.62446	0.521412	0.524135	0.451101	0.496955	0.681399	0.510052	0.512024	0.50674	0.447696	0.522507	0.45135	0.459932	0.534653	0.537014	0.470168	0.499452	0.754715	0.999251	0.708545	0.790084	0.613813	0.818692	0.793475	0.652608	0.702402	0.834848	0.718198	0.815936	0.774244	0.735192	0.804332	0.708152	0.7769	0.736577	0.848262
12	0.400723	0.522269	0.54101	0.644812	0.43531	0.534274	0.700094	0.410825	0.415883	0.654337	0.51791	0.515304	0.531076	0.591621	0.536463	0.502323	0.426126	0.465089	0.649238	0.485198	0.476588	0.479048	0.420819	0.504017	0.414422	0.440472	0.513573	0.491647	0.450653	0.480514	0.740004	1.0025	0.705932	0.779573	0.584284	0.805844	0.785724	0.629396	0.687963	0.830542	0.713142	0.800906	0.763295	0.726477	0.792679	0.713434	0.767111	0.72424	0.835567
13	0.400683	0.502605	0.512704	0.618607	0.440791	0.515247	0.676434	0.402528	0.390825	0.621525	0.487407	0.523735	0.503119	0.558782	0.551515	0.483705	0.400331	0.432566	0.615361	0.459739	0.443609	0.455908	0.401445	0.489366	0.407034	0.404081	0.501962	0.44628	0.431139	0.461576	0.71372	0.977892	0.699993	0.758548	0.561065	0.785138	0.783008	0.609517	0.677363	0.81766	0.716226	0.78437	0.752346	0.717762	0.781025	0.747637	0.741156	0.711729	0.816915
14	0.400643	0.48294	0.484399	0.592403	0.446273	0.496221	0.652774	0.39423	0.365766	0.588713	0.456904	0.532165	0.472787	0.564736	0.503974	0.465088	0.374537	0.400042	0.581483	0.434279	0.41063	0.432767	0.382072	0.474715	0.399647	0.36769	0.49035	0.440364	0.400972	0.421922	0.687437	0.953282	0.694053	0.737524	0.537846	0.764432	0.780292	0.589638	0.666763	0.804778	0.719309	0.767834	0.740518	0.697738	0.759696	0.78184	0.7152	0.699218	0.798263
15	0.398406	0.470421	0.462087	0.573289	0.429982	0.486929	0.636182	0.389961	0.351208	0.563318	0.434604	0.523278	0.442416	0.570691	0.456433	0.437284	0.345178	0.376835	0.564706	0.408023	0.385937	0.421606	0.361704	0.454942	0.389012	0.332537	0.471956	0.434449	0.370805	0.382267	0.662112	0.914777	0.670456	0.719991	0.539909	0.745802	0.762796	0.579353	0.650035	0.791407	0.705303	0.759366	0.728691	0.677715	0.738366	0.792164	0.68974	0.675594	0.783106
16	0.394895	0.46204	0.443246	0.558279	0.39464	0.485601	0.625773	0.389216	0.353544	0.549854	0.4255	0.486532	0.444109	0.546606	0.441788	0.404533	0.313899	0.358643	0.557136	0.38107	0.368494	0.420928	0.340464	0.426929	0.373153	0.299375	0.442651	0.410095	0.355768	0.373543	0.637302	0.868791	0.637352	0.704205	0.562659	0.728869	0.732368	0.576918	0.623447	0.777251	0.663805	0.763879	0.727679	0.663145	0.701615	0.789629	0.664528	0.645986	0.769695
17	0.391385	0.453658	0.424405	0.54327	0.359299	0.484274	0.615364	0.388471	0.355879	0.53639	0.416397	0.449786	0.453001	0.516514	0.433723	0.371783	0.282621	0.340451	0.549566	0.354117	0.351052	0.42025	0.319224	0.398916	0.357293	0.266213	0.413345	0.382053	0.343756	0.371005	0.612492	0.822805	0.604247	0.688418	0.585408	0.711936	0.70194	0.574483	0.59686	0.763095	0.622307	0.768391	0.72883	0.649667	0.66178	0.787094	0.639316	0.616377	0.756284
18	0.357154	0.413545	0.40701	0.526607	0.341586	0.48754	0.608303	0.375324	0.344278	0.524575	0.411119	0.426064	0.434527	0.48806	0.404009	0.359271	0.266778	0.341724	0.543978	0.34109	0.335715	0.407992	0.296881	0.381779	0.338255	0.241591	0.393048	0.362275	0.325124	0.354883	0.599994	0.779595	0.591348	0.683156	0.551777	0.698991	0.687295	0.561359	0.577164	0.756914	0.591552	0.762931	0.70324	0.636093	0.643331	0.756663	0.637871	0.617092	0.744264
19	0.314426	0.364655	0.390054	0.509441	0.333367	0.49328	0.603044	0.355499	0.316748	0.514647	0.410215	0.417227	0.402371	0.460425	0.364264	0.352357	0.255204	0.347863	0.538885	0.336126	0.321597	0.388536	0.273852	0.377071	0.315584	0.226728	0.383761	0.346628	0.303425	0.33197	0.590903	0.737154	0.5835	0.680525	0.487787	0.688195	0.681787	0.542046	0.565346	0.760482	0.573074	0.746072	0.665258	0.622476	0.635574	0.719259	0.642368	0.625388	0.732592
20	0.271698	0.315764	0.373099	0.492275	0.325147	0.49902	0.597785	0.335674	0.289219	0.504718	0.40931	0.40839	0.377809	0.44666	0.353237	0.345443	0.24363	0.354002	0.533793	0.331161	0.307479	0.369079	0.250823	0.372363	0.292913	0.211866	0.374473	0.337852	0.296194	0.31676	0.581811	0.694713	0.575651	0.677894	0.423798	0.677398	0.676279	0.522733	0.553527	0.764049	0.554596	0.729214	0.652078	0.61201	0.634352	0.681854	0.646865	0.633683	0.72092
21	0.266782	0.311677	0.353783	0.480691	0.308835	0.484423	0.584338	0.32874	0.27368	0.493141	0.40289	0.393524	0.360842	0.445871	0.369074	0.344694	0.236709	0.34759	0.503918	0.310951	0.284794	0.360848	0.247341	0.367706	0.261718	0.199323	0.366685	0.335501	0.302499	0.308756	0.571953	0.734967	0.570123	0.668086	0.39277	0.669319	0.667269	0.506698	0.538001	0.763138	0.557402	0.711062	0.662101	0.604494	0.639244	0.65517	0.642361	0.623695	0.708464
22	0.265304	0.311662	0.334252	0.469727	0.289324	0.461786	0.567655	0.32733	0.268634	0.480122	0.391642	0.373727	0.347583	0.448	0.369854	0.344507	0.23021	0.340037	0.471791	0.283677	0.258437	0.357819	0.252917	0.363094	0.22355	0.188678	0.36021	0.32844	0.297657	0.307228	0.56201	0.782739	0.564805	0.657625	0.374773	0.662315	0.656756	0.492069	0.519443	0.758562	0.577621	0.691851	0.667528	0.599507	0.635708	0.629676	0.637038	0.612044	0.695938
23	0.263658	0.311778	0.315076	0.458716	0.269813	0.439149	0.550971	0.32592	0.263588	0.467103	0.380395	0.35393	0.341738	0.455548	0.342669	0.343986	0.223571	0.333247	0.440631	0.256402	0.232079	0.35479	0.258494	0.358482	0.185382	0.178033	0.353734	0.312628	0.272114	0.317726	0.55201	0.829657	0.558981	0.647982	0.356776	0.655311	0.646244	0.477439	0.500885	0.753986	0.59784	0.67264	0.664419	0.599217	0.616519	0.60565	0.630751	0.600543	0.683512
24	0.257123	0.315678	0.306183	0.446343	0.24629	0.425301	0.539504	0.317981	0.265817	0.465393	0.368203	0.346251	0.337519	0.458166	0.316713	0.337145	0.212894	0.348561	0.437538	0.241345	0.223172	0.343548	0.249033	0.33857	0.178871	0.173022	0.337127	0.297061	0.248759	0.322792	0.540346	0.860359	0.546061	0.649781	0.329474	0.644946	0.633468	0.43501	0.492881	0.734111	0.574864	0.658772	0.656825	0.596367	0.600244	0.624167	0.596476	0.593381	0.673991
25	0.250588	0.319578	0.297291	0.433969	0.221764	0.413651	0.529481	0.308235	0.27257	0.470711	0.355423	0.345588	0.34143	0.438822	0.296903	0.330305	0.202216	0.363876	0.434445	0.229668	0.219576	0.329805	0.234561	0.3098	0.190688	0.171273	0.314653	0.282717	0.23634	0.303665	0.528682	0.891061	0.533142	0.651581	0.299846	0.63374	0.620065	0.384892	0.490987	0.704725	0.526882	0.647997	0.629253	0.582117	0.596946	0.642684	0.562201	0.586219	0.664471
26	0.243534	0.319064	0.287152	0.423008	0.197238	0.402001	0.519457	0.29849	0.279322	0.47603	0.342643	0.344925	0.345342	0.419479	0.277093	0.323829	0.192554	0.377401	0.430421	0.21799	0.215981	0.316063	0.220088	0.281031	0.202505	0.169524	0.292179	0.268373	0.223921	0.284537	0.518131	0.904077	0.520247	0.647942	0.270217	0.622534	0.606662	0.334773	0.489094	0.675339	0.478899	0.637223	0.60168	0.567867	0.593647	0.661951	0.534374	0.579701	0.6561
27	0.233535	0.296477	0.270779	0.419107	0.19189	0.412418	0.507757	0.286646	0.264908	0.456947	0.333019	0.331002	0.337533	0.425314	0.288317	0.318978	0.187968	0.380787	0.421742	0.215508	0.211793	0.297318	0.217291	0.275461	0.205071	0.16704	0.281504	0.266966	0.203182	0.281831	0.513144	0.828661	0.507478	0.620079	0.274571	0.611465	0.601071	0.338138	0.476918	0.666996	0.464262	0.61617	0.605607	0.545172	0.602077	0.685471	0.538784	0.576409	0.653475
28	0.223536	0.27389	0.254407	0.415206	0.189492	0.426231	0.49576	0.274481	0.241424	0.428218	0.324642	0.311837	0.329526	0.431149	0.29954	0.314127	0.183383	0.384174	0.413064	0.214649	0.207514	0.27769	0.216555	0.278327	0.204273	0.164288	0.275119	0.265559	0.182303	0.279404	0.508156	0.753246	0.494709	0.592215	0.284152	0.600416	0.596858	0.349732	0.460677	0.666972	0.46281	0.591381	0.609533	0.522477	0.610705	0.708992	0.543194	0.573117	0.65085
29	0.214701	0.256846	0.237494	0.409514	0.187094	0.440043	0.483764	0.262315	0.217939	0.399489	0.316266	0.292672	0.302185	0.436626	0.290076	0.308595	0.177685	0.382942	0.398799	0.21379	0.203235	0.258062	0.215818	0.281194	0.203476	0.161537	0.268733	0.262424	0.191873	0.276198	0.499015	0.706894	0.479372	0.577103	0.293734	0.589367	0.592645	0.361325	0.444437	0.666948	0.461357	0.566591	0.602922	0.524798	0.582389	0.721808	0.540182	0.570154	0.64696
30	0.208813	0.253825	0.219214	0.399293	0.190387	0.41878	0.480526	0.248714	0.209306	0.400099	0.298614	0.286761	0.27001	0.442023	0.275967	0.301341	0.169175	0.370028	0.370403	0.203583	0.177717	0.252814	0.207212	0.279701	0.184868	0.150119	0.264299	0.258944	0.207534	0.272837	0.479367	0.734053	0.458043	0.591743	0.267968	0.585015	0.592318	0.378314	0.438946	0.657113	0.465734	0.571652	0.594204	0.532736	0.54578	0.70755	0.518395	0.568023	0.639871
31	0.202924	0.250803	0.200935	0.389071	0.193875	0.396308	0.477749	0.235063	0.204385	0.408045	0.278879	0.283826	0.266228	0.430175	0.277329	0.294087	0.160664	0.357114	0.342007	0.192883	0.151082	0.248322	0.198044	0.277229	0.162699	0.136967	0.260254	0.258638	0.204881	0.257782	0.459719	0.761212	0.436713	0.606383	0.240984	0.580894	0.592195	0.395586	0.435868	0.645075	0.471277	0.582683	0.594169	0.51786	0.529689	0.693293	0.496608	0.565892	0.632782
32	0.201555	0.253922	0.189351	0.376927	0.198277	0.375496	0.474436	0.221821	0.199464	0.415991	0.259144	0.280892	0.277733	0.409042	0.287022	0.286666	0.156441	0.331762	0.32216	0.182812	0.12555	0.244032	0.188953	0.274757	0.140529	0.123815	0.25621	0.260041	0.192367	0.23688	0.449596	0.754635	0.425434	0.601178	0.217352	0.576345	0.591592	0.411528	0.432791	0.633036	0.47682	0.593714	0.598809	0.491577	0.523858	0.658951	0.485199	0.560391	0.627792
33	0.206965	0.266252	0.187812	0.361896	0.220026	0.386237	0.460942	0.216358	0.203087	0.404859	0.250102	0.279615	0.283091	0.397012	0.289481	0.278995	0.158647	0.286403	0.315137	0.18469	0.121002	0.243558	0.181328	0.246477	0.157547	0.110108	0.247249	0.258329	0.180509	0.224371	0.453759	0.697455	0.428225	0.568191	0.240649	0.565816	0.581877	0.408839	0.418033	0.644502	0.46112	0.585179	0.609687	0.478061	0.511226	0.594484	0.489357	0.549832	0.625952
34	0.212376	0.278582	0.186273	0.346866	0.241776	0.396978	0.447448	0.210894	0.20766	0.391992	0.242032	0.278489	0.281879	0.394713	0.284706	0.271325	0.160854	0.241043	0.308115	0.186569	0.116454	0.243084	0.173703	0.215329	0.17892	0.096339	0.237638	0.253285	0.169306	0.220255	0.457922	0.640274	0.431017	0.535204	0.263947	0.555286	0.572161	0.40615	0.402214	0.658103	0.443059	0.574866	0.626802	0.47731	0.491792	0.530017	0.493515	0.539274	0.624112
35	0.208868	0.27667	0.174304	0.342667	0.252288	0.408723	0.43569	0.206271	0.212233	0.379126	0.233961	0.277363	0.281601	0.383965	0.283451	0.265111	0.150498	0.217933	0.309865	0.183394	0.114379	0.240902	0.166915	0.184181	0.200292	0.082571	0.228027	0.248562	0.158228	0.214717	0.45076	0.610408	0.430853	0.519681	0.290085	0.546858	0.562777	0.401861	0.386395	0.671705	0.424998	0.564552	0.636027	0.474887	0.473414	0.522088	0.487028	0.525182	0.617629
36	0.197017	0.261432	0.152577	0.348601	0.206609	0.425487	0.432607	0.206411	0.203969	0.383551	0.252514	0.265956	0.283338	0.356318	0.289238	0.26026	0.127582	0.217073	0.320389	0.154957	0.124669	0.229045	0.164874	0.181856	0.177896	0.068354	0.23205	0.244589	0.147422	0.205865	0.433004	0.606095	0.427923	0.520495	0.330421	0.548935	0.555056	0.389573	0.380752	0.654504	0.394302	0.56807	0.629473	0.469118	0.45731	0.574595	0.469897	0.507312	0.606183
37	0.185165	0.246195	0.13085	0.354535	0.16093	0.442252	0.429524	0.206552	0.195262	0.388572	0.271985	0.254376	0.279642	0.334531	0.294536	0.255408	0.104666	0.216213	0.330912	0.12652	0.134958	0.217188	0.162832	0.180019	0.154757	0.05413	0.236303	0.24113	0.138262	0.198196	0.415249	0.601783	0.424993	0.521309	0.370757	0.551013	0.547335	0.377286	0.37546	0.636241	0.36317	0.571822	0.619642	0.46459	0.444361	0.627103	0.452766	0.489442	0.594736
38	0.184821	0.216117	0.124338	0.350968	0.130979	0.449147	0.426167	0.203474	0.186652	0.39312	0.290195	0.243193	0.234809	0.357108	0.296138	0.2476	0.102277	0.213217	0.322648	0.105107	0.141208	0.208065	0.157886	0.177666	0.132633	0.041599	0.240552	0.241567	0.141569	0.19949	0.401836	0.617782	0.419841	0.513009	0.38691	0.547098	0.53965	0.363375	0.369663	0.618185	0.334717	0.574016	0.584991	0.469457	0.455295	0.629931	0.44888	0.479488	0.592548
39	0.191631	0.176812	0.127969	0.341496	0.144281	0.428903	0.422059	0.19155	0.180829	0.38392	0.271837	0.243544	0.189976	0.379685	0.29774	0.237954	0.11265	0.208894	0.302706	0.104768	0.135338	0.207144	0.144225	0.16553	0.129777	0.052784	0.244717	0.242005	0.144875	0.200783	0.391123	0.646407	0.413308	0.499046	0.336557	0.526703	0.532067	0.344594	0.349255	0.606134	0.357158	0.546613	0.55034	0.474325	0.466229	0.601878	0.453228	0.474456	0.596116
40	0.198441	0.137507	0.1316	0.332023	0.157583	0.408658	0.417951	0.179625	0.175006	0.374721	0.25348	0.243896	0.163994	0.362271	0.28296	0.228308	0.123023	0.204571	0.282763	0.10443	0.129469	0.206223	0.130564	0.153394	0.12692	0.063969	0.248881	0.246218	0.147103	0.199174	0.380411	0.675033	0.406775	0.485082	0.286204	0.506309	0.524485	0.325813	0.328846	0.594082	0.3796	0.51921	0.532157	0.467708	0.432373	0.573824	0.457576	0.469423	0.599684
41	0.179635	0.139076	0.143199	0.32448	0.170371	0.38594	0.412485	0.173296	0.16742	0.363936	0.236718	0.244761	0.139359	0.342753	0.26701	0.228489	0.115412	0.204949	0.26814	0.104113	0.125176	0.202826	0.121003	0.145038	0.121856	0.073014	0.249882	0.250701	0.149254	0.197358	0.375469	0.661141	0.39896	0.469581	0.253521	0.497146	0.514803	0.308031	0.311205	0.587451	0.399565	0.495578	0.51515	0.46027	0.395318	0.54734	0.460795	0.46315	0.587698
42	0.151514	0.155508	0.157697	0.317639	0.182207	0.358947	0.404497	0.176634	0.14649	0.342847	0.230324	0.248964	0.144288	0.311739	0.271953	0.232244	0.101262	0.207036	0.255452	0.103836	0.123417	0.195151	0.118525	0.161256	0.102445	0.069934	0.232952	0.242092	0.139644	0.189086	0.372625	0.631788	0.390679	0.453569	0.25136	0.507381	0.501498	0.291972	0.311554	0.616052	0.403432	0.496454	0.511425	0.443774	0.403916	0.521427	0.463602	0.456426	0.570056
43	0.123393	0.171939	0.172194	0.310798	0.194042	0.331955	0.396508	0.179973	0.125561	0.321758	0.223929	0.253168	0.159072	0.276894	0.283862	0.235999	0.087112	0.209123	0.242764	0.103558	0.121659	0.187476	0.116047	0.177474	0.083033	0.066855	0.216021	0.229118	0.126115	0.178661	0.369782	0.602435	0.382398	0.437557	0.249198	0.517616	0.488193	0.275914	0.311903	0.644653	0.4073	0.497331	0.511742	0.42452	0.427731	0.495515	0.46641	0.449702	0.552415
44	0.132533	0.17095	0.159335	0.316957	0.19918	0.308258	0.38796	0.174888	0.113346	0.303345	0.221245	0.256483	0.161059	0.27345	0.284219	0.233207	0.070913	0.208141	0.237102	0.100636	0.114019	0.186975	0.113813	0.186439	0.069795	0.062205	0.200276	0.21768	0.127644	0.172194	0.35778	0.640148	0.372825	0.444037	0.246839	0.518104	0.478285	0.26903	0.312485	0.658534	0.396929	0.500518	0.518568	0.420671	0.4406	0.501905	0.439976	0.446425	0.551434
45	0.149126	0.166477	0.141005	0.325716	0.19716	0.288083	0.378814	0.160799	0.132637	0.294612	0.231976	0.256875	0.153259	0.294018	0.275745	0.22926	0.054353	0.206619	0.23252	0.094691	0.099656	0.194671	0.111877	0.171573	0.075077	0.052845	0.188087	0.207499	0.141494	0.168965	0.343946	0.689696	0.363025	0.454487	0.244268	0.508172	0.47226	0.272632	0.313831	0.619192	0.339771	0.510636	0.530372	0.4286	0.445097	0.513995	0.409044	0.443756	0.553017
46	0.165719	0.162003	0.122675	0.334475	0.19514	0.267908	0.369668	0.146709	0.151929	0.285878	0.242708	0.257268	0.150057	0.304458	0.265282	0.225312	0.037793	0.205096	0.227939	0.088746	0.085294	0.202368	0.109942	0.156707	0.080359	0.043486	0.175897	0.202587	0.148012	0.163572	0.330112	0.739245	0.353225	0.464936	0.241697	0.49824	0.466235	0.276234	0.315177	0.57985	0.282613	0.520754	0.532385	0.431753	0.444879	0.526085	0.378112	0.441087	0.554599
47	0.152971	0.155021	0.11032	0.321351	0.183858	0.270596	0.363488	0.140444	0.161331	0.281915	0.244488	0.252576	0.154249	0.298602	0.25162	0.21456	0.043583	0.227761	0.239142	0.08699	0.080899	0.200194	0.110125	0.148364	0.083233	0.037818	0.167807	0.206152	0.142735	0.154934	0.329063	0.683301	0.354386	0.450613	0.243266	0.495912	0.459732	0.261022	0.31333	0.556277	0.250977	0.523167	0.519709	0.427739	0.437587	0.503032	0.385125	0.434176	0.551125
48	0.139726	0.147952	0.098067	0.307473	0.165959	0.289613	0.359578	0.140162	0.149389	0.287495	0.228367	0.237716	0.155558	0.292719	0.246282	0.203574	0.050548	0.251699	0.250889	0.088438	0.084126	0.190473	0.111929	0.152137	0.081634	0.039007	0.167915	0.210254	0.135315	0.149323	0.328454	0.62557	0.355732	0.435871	0.248002	0.499399	0.452864	0.231424	0.305094	0.564241	0.266738	0.511271	0.513635	0.426364	0.432091	0.478129	0.394135	0.427041	0.547385
49	0.12713	0.142084	0.086285	0.294377	0.14806	0.308631	0.355668	0.13988	0.137448	0.293074	0.212246	0.222855	0.146445	0.286735	0.271033	0.193831	0.05647	0.273618	0.26093	0.089886	0.087353	0.180751	0.113733	0.155909	0.080035	0.040197	0.168024	0.216509	0.119321	0.154655	0.327055	0.571561	0.356804	0.422663	0.252738	0.502887	0.445995	0.201825	0.296859	0.572205	0.2825	0.499374	0.529252	0.434529	0.433093	0.455867	0.402325	0.419723	0.543761
50	0.123618	0.153036	0.081094	0.292227	0.141598	0.314796	0.35225	0.136695	0.126108	0.297632	0.203959	0.214389	0.137054	0.281296	0.293876	0.201492	0.047789	0.267281	0.247067	0.087286	0.088212	0.182147	0.100085	0.156406	0.075741	0.030813	0.166384	0.22238	0.103689	0.159734	0.310639	0.56967	0.354023	0.43094	0.234918	0.499778	0.456699	0.188656	0.286052	0.577376	0.284857	0.493749	0.543855	0.442028	0.434291	0.470576	0.399045	0.409843	0.541759
51	0.120105	0.163988	0.075903	0.290077	0.140854	0.314533	0.349098	0.131947	0.115611	0.300759	0.206641	0.214875	0.111273	0.291653	0.261407	0.209153	0.039108	0.260943	0.233205	0.082343	0.087699	0.189978	0.076831	0.151989	0.067674	0.005569	0.162121	0.205569	0.109362	0.149879	0.294224	0.567779	0.351243	0.439217	0.204953	0.493118	0.477575	0.184999	0.271647	0.578638	0.268448	0.496903	0.529032	0.430203	0.447115	0.485284	0.395766	0.399962	0.539757
52	0.116276	0.169571	0.070044	0.286742	0.140111	0.314271	0.345945	0.127199	0.105114	0.303885	0.209322	0.215362	0.085491	0.30201	0.228937	0.215418	0.033516	0.254941	0.220264	0.077399	0.087186	0.197809	0.053577	0.147572	0.059607	-0.01968	0.157858	0.188757	0.115036	0.140024	0.279938	0.562166	0.347414	0.443066	0.174988	0.486458	0.498452	0.181342	0.257241	0.579899	0.25204	0.500058	0.514209	0.418377	0.459938	0.495109	0.390597	0.395246	0.537376
53	0.111041	0.151241	0.061211	0.27813	0.149359	0.303686	0.358887	0.124322	0.101343	0.302391	0.205367	0.204819	0.083288	0.297016	0.221026	0.216101	0.041689	0.250431	0.211422	0.072251	0.083588	0.185732	0.055661	0.143284	0.052874	-0.02376	0.156392	0.182917	0.120402	0.138546	0.275138	0.539974	0.339388	0.429203	0.176716	0.477488	0.497931	0.181281	0.250429	0.579854	0.249195	0.495767	0.507769	0.410945	0.427807	0.483178	0.377017	0.413538	0.533307
54	0.105806	0.13291	0.052377	0.269518	0.162558	0.289348	0.378193	0.122185	0.104299	0.296276	0.195204	0.183247	0.0858	0.289312	0.217449	0.216783	0.049861	0.245921	0.20258	0.067021	0.078769	0.165123	0.068605	0.139133	0.047476	-0.0067	0.157724	0.179271	0.125714	0.138546	0.270338	0.517782	0.331362	0.41534	0.189968	0.467678	0.488951	0.182642	0.251211	0.578503	0.259915	0.484031	0.502809	0.404288	0.386685	0.471247	0.363436	0.43183	0.529239
55	0.108708	0.124336	0.050678	0.265996	0.175757	0.27501	0.397498	0.120048	0.107254	0.290161	0.18504	0.161675	0.097179	0.289862	0.224778	0.217799	0.057946	0.235734	0.200739	0.061792	0.07395	0.144513	0.081548	0.134982	0.042077	0.010364	0.159055	0.175366	0.13273	0.13299	0.267957	0.502055	0.328554	0.40656	0.20322	0.457869	0.47997	0.184003	0.251994	0.577152	0.270635	0.472294	0.480486	0.401257	0.387464	0.461852	0.354907	0.435683	0.524013
56	0.130594	0.138527	0.065626	0.274346	0.172795	0.263738	0.386495	0.114254	0.113633	0.289736	0.181943	0.154218	0.113334	0.294539	0.237562	0.219535	0.065827	0.2123	0.215236	0.068089	0.068245	0.14477	0.084992	0.13165	0.038429	0.007824	0.164852	0.171311	0.140732	0.124217	0.271221	0.501415	0.337006	0.40875	0.202163	0.451991	0.478298	0.168439	0.254519	0.569927	0.268582	0.463661	0.449483	0.400178	0.412501	0.458372	0.358164	0.405848	0.516086
57					0.165793	0.253232	0.367108	0.107546	0.122456	0.293663	0.183891	0.156842	0.124082	0.289547	0.242162					0.077269	0.062317	0.150799	0.085807	0.128902	0.036032	-0.00872	0.174062	0.165975	0.142464	0.125995					0.19753	0.447096	0.478453	0.148644	0.25829	0.558504	0.257405	0.457096	0.446794	0.392108	0.41781
58					0.15879	0.242727	0.347721	0.100838	0.131279	0.29759	0.18584	0.159465	0.128225	0.272737	0.236761					0.086448	0.05639	0.156827	0.086623	0.126155	0.033634	-0.02526	0.183273	0.158963	0.135994	0.14157					0.192896	0.442202	0.478608	0.128849	0.262061	0.547082	0.246229	0.450531	0.478713	0.375493	0.399007
59					0.15008	0.239567	0.358952	0.103309	0.123518	0.285436	0.17448	0.169487	0.131981	0.262776	0.232993					0.093412	0.061985	0.149349	0.080207	0.117815	0.049365	-0.028	0.171392	0.153689	0.133626	0.155173					0.167785	0.442063	0.473278	0.119037	0.259099	0.559338	0.246146	0.438364	0.497425	0.366198	0.378538
60					0.14118	0.237222	0.373584	0.106801	0.106826	0.263971	0.155953	0.183493	0.134575	0.273364	0.234122					0.100083	0.069102	0.140086	0.072678	0.106465	0.074856	-0.02384	0.148153	0.153625	0.143564	0.162862					0.1404	0.442452	0.467338	0.110543	0.25224	0.585302	0.252036	0.42318	0.476521	0.380953	0.352597
61					0.13228	0.234878	0.388216	0.110293	0.090134	0.242506	0.137426	0.197498	0.137172	0.28303	0.234527					0.106755	0.076218	0.130824	0.06515	0.095115	0.100348	-0.01968	0.124914	0.153504	0.152809	0.170026					0.113015	0.442842	0.461399	0.102049	0.24538	0.611267	0.257926	0.407997	0.456584	0.395236	0.327125
62					0.127816	0.244564	0.380535	0.124927	0.087408	0.237568	0.144857	0.197901	0.139823	0.265964	0.213943					0.074939	0.070463	0.132239	0.070492	0.098366	0.099525	-0.00887	0.117845	0.150041	0.121112	0.146169					0.110205	0.441445	0.456175	0.100902	0.244124	0.609762	0.257896	0.417286	0.464695	0.381668	0.329275
63					0.123426	0.254453	0.372084	0.139945	0.089759	0.23864	0.161728	0.193358	0.142475	0.248899	0.193359					0.041797	0.064031	0.134216	0.076512	0.106484	0.089931	0.004152	0.116167	0.146577	0.089416	0.122313					0.107813	0.440019	0.450975	0.100009	0.244736	0.598268	0.255891	0.434734	0.472807	0.3681	0.331426
64					0.119584	0.263484	0.363343	0.153576	0.092111	0.239712	0.178599	0.188815	0.12331	0.261239	0.202421					0.009899	0.058079	0.136123	0.082837	0.114602	0.080337	0.017179	0.114489	0.140483	0.114501	0.13024					0.106804	0.438743	0.445299	0.098861	0.245348	0.586774	0.253887	0.452181	0.488423	0.351729	0.342639
65					0.126126	0.256192	0.349108	0.140861	0.092696	0.243158	0.177411	0.1845	0.099782	0.278769	0.216714					0.014104	0.066065	0.136692	0.098005	0.115175	0.078402	0.018974	0.116984	0.133925	0.149606	0.143776					0.132097	0.440331	0.430576	0.090339	0.24481	0.573257	0.260857	0.450114	0.505364	0.334862	0.355451
66					0.132669	0.248901	0.334873	0.128146	0.092928	0.247079	0.172611	0.18023	0.076286	0.274067	0.219376					0.018308	0.07405	0.137262	0.113174	0.114056	0.078187	0.018247	0.120415	0.135658	0.141503	0.131259					0.157391	0.441919	0.415852	0.081816	0.244041	0.559286	0.269621	0.444143	0.515914	0.33339	0.354267
67					0.13827	0.24403	0.322589	0.11588	0.093161	0.251	0.167811	0.17596	0.052806	0.258249	0.216648					0.021757	0.081563	0.136804	0.124291	0.112936	0.077972	0.01752	0.123847	0.141539	0.111795	0.105716					0.174927	0.441296	0.40308	0.073279	0.243272	0.545315	0.278386	0.438173	0.523268	0.339614	0.346085
68					0.137751	0.252875	0.321366	0.106526	0.085212	0.246411	0.175999	0.186691	0.059334	0.262128	0.215131					0.020287	0.086003	0.129665	0.109067	0.118187	0.062661	0.004658	0.126308	0.143987	0.092545	0.101294					0.148503	0.428147	0.402986	0.064651	0.240293	0.523561	0.260763	0.430339	0.506764	0.336232	0.338403
69					0.137232	0.261719	0.320143	0.097172	0.076182	0.240697	0.185631	0.199088	0.097939	0.287061	0.214907					0.018818	0.090444	0.122526	0.093843	0.124418	0.045356	-0.00981	0.128642	0.142766	0.084475	0.119449					0.122079	0.414998	0.402892	0.056024	0.237022	0.500779	0.239656	0.422259	0.466403	0.323245	0.331256
70					0.142857	0.275238	0.319414	0.091682	0.067152	0.234983	0.195262	0.211485	0.11864	0.299261	0.205877					0.018922	0.092044	0.113299	0.080665	0.13065	0.028052	-0.02427	0.130975	0.144566	0.083401	0.125578					0.100851	0.406159	0.398405	0.04568	0.233751	0.477998	0.218549	0.41418	0.439135	0.317352	0.327978
71					0.166913	0.302779	0.320308	0.098888	0.068618	0.228964	0.178112	0.193796	0.097562	0.281749	0.1763					0.024711	0.084308	0.097213	0.074887	0.123245	0.025815	-0.01458	0.122648	0.153413	0.098648	0.103643					0.096697	0.411482	0.379484	0.029699	0.228749	0.4672	0.21685	0.405086	0.440123	0.328013	0.333728
72					0.190969	0.330321	0.321202	0.106093	0.070635	0.222934	0.160038	0.175071	0.076277	0.266599	0.151162					0.0305	0.076571	0.081126	0.069109	0.11561	0.023832	-0.00447	0.11414	0.159558	0.111444	0.084503					0.092542	0.416804	0.360563	0.013717	0.223688	0.456815	0.21582	0.395976	0.44092	0.336568	0.33737
73					0.197868	0.343677	0.319299	0.11196	0.07233	0.217453	0.141551	0.156599	0.053415	0.26933	0.154883					0.032473	0.067458	0.075118	0.065981	0.108216	0.022285	0.005397	0.106043	0.145243	0.102188	0.090506					0.086651	0.42069	0.347496	0.005443	0.218793	0.447899	0.214345	0.387174	0.440283	0.33144	0.32505
74					0.170455	0.328662	0.311802	0.115147	0.069498	0.219641	0.117287	0.141679	0.030553	0.272061	0.158604					0.026211	0.055371	0.09086	0.069037	0.104198	0.026823	0.011952	0.103694	0.130927	0.092932	0.096509					0.077533	0.421702	0.346136	0.012582	0.216225	0.459542	0.206638	0.382688	0.439645	0.326311	0.312731
75					0.143041	0.313648	0.304305	0.118335	0.066667	0.22183	0.093023	0.12676	0.050782	0.273564	0.1998					0.019949	0.043284	0.106602	0.072093	0.10018	0.031361	0.018507	0.101345	0.128988	0.094942	0.1086					0.068415	0.422713	0.344777	0.019722	0.213657	0.471185	0.198931	0.378203	0.409394	0.317355	0.298334
76					0.124763	0.307126	0.300711	0.11563	0.064995	0.22432	0.07355	0.116211	0.074928	0.27498	0.243673					0.017407	0.041418	0.109627	0.078301	0.097088	0.036512	0.023092	0.097781	0.127932	0.097758	0.121125					0.069219	0.420009	0.338405	0.025441	0.21194	0.484513	0.19263	0.374405	0.377027	0.308125	0.28379
77					0.119276	0.312495	0.302971	0.104086	0.070864	0.228514	0.081222	0.130423	0.071978	0.28489	0.244805					0.020072	0.05386	0.093576	0.089235	0.098623	0.044727	0.017825	0.088144	0.137234	0.098943	0.117409					0.083914	0.412104	0.325016	0.02917	0.215047	0.507394	0.193361	0.374047	0.371213	0.308784	0.289052
78					0.113788	0.317863	0.305231	0.092542	0.076733	0.232708	0.088895	0.144636	0.059995	0.297386	0.232929					0.022737	0.066301	0.077526	0.10017	0.100157	0.052942	0.012558	0.078506	0.149987	0.099586	0.108751					0.09861	0.404198	0.311626	0.0329	0.218155	0.530275	0.194093	0.373689	0.37348	0.312453	0.300341
79					0.126835	0.311727	0.308918	0.088168	0.078338	0.234884	0.091641	0.153273	0.066725	0.298919	0.225167					0.020404	0.065515	0.069813	0.103644	0.097843	0.057342	0.007758	0.071882	0.149492	0.106071	0.114606					0.094564	0.395928	0.300051	0.027312	0.217928	0.542056	0.192037	0.373288	0.370362	0.295641	0.278339
80					0.157221	0.294829	0.313941	0.0905	0.06453	0.229759	0.078198	0.143594	0.086819	0.293144	0.220147					0.013395	0.052353	0.0699	0.10014	0.082883	0.049208	0.004493	0.075161	0.139532	0.11673	0.130827					0.072986	0.387316	0.290174	0.013008	0.205646	0.513705	0.180822	0.37274	0.363655	0.265173	0.232556
81					0.187607	0.27793	0.318964	0.092832	0.050723	0.224635	0.064755	0.133916	0.09684	0.278747	0.218					0.006385	0.039192	0.069986	0.096635	0.067924	0.041074	0.001229	0.078439	0.13356	0.122888	0.13715					0.051407	0.378705	0.280296	-0.0013	0.193365	0.485354	0.169608	0.372193	0.366321	0.258131	0.219077
82					0.187065	0.266936	0.318826	0.093397	0.041326	0.217937	0.054984	0.128982	0.09175	0.251419	0.22016					0.012688	0.021122	0.081968	0.092121	0.054108	0.038015	-0.00257	0.079759	0.134001	0.121806	0.127549					0.047985	0.379114	0.287332	-0.00932	0.185962	0.465228	0.172033	0.373219	0.383046	0.286227	0.254054
83					0.168617	0.25936	0.315701	0.092938	0.041448	0.207843	0.053137	0.134289	0.09245	0.232483	0.220252					0.027265	4.66e-07	0.101346	0.086978	0.042578	0.045107	-0.00743	0.07716	0.13474	0.118147	0.120578					0.055074	0.38513	0.304882	-0.01371	0.189087	0.46285	0.20174	0.37739	0.399797	0.305676	0.285824
84					0.150168	0.251784	0.312576	0.09248	0.04157	0.19775	0.05129	0.139595								0.041843	-0.02112	0.120723	0.081836	0.031049	0.052199	-0.01228	0.074562								0.062162	0.391146	0.322432	-0.01811	0.192212	0.460473	0.231447	0.381561
85					0.126062	0.264841	0.289245	0.1027	0.045363	0.192845	0.058682	0.134446								0.033464	-0.01152	0.121232	0.073864	0.026675	0.052957	-0.01154	0.073261								0.064573	0.388151	0.317558	-0.00505	0.189955	0.464717	0.236194	0.373568
86					0.099897	0.2854	0.258568	0.116804	0.054298	0.195206	0.079006	0.114659								0.016738	0.009249	0.114282	0.064774	0.031656	0.045974	-0.00394	0.073547								0.065283	0.381879	0.304529	0.01434	0.180162	0.478229	0.208302	0.350705
87					0.073733	0.30596	0.22789	0.130908	0.063232	0.197567	0.099331	0.094871								1.18e-05	0.030019	0.107331	0.055684	0.036638	0.03899	0.003658	0.073833								0.065994	0.375608	0.291499	0.033734	0.17037	0.49174	0.18041	0.327843
88					0.089289	0.294087	0.229151	0.123668	0.056634	0.203026	0.104364	0.088335								0.004322	0.036732	0.112874	0.065142	0.044994	0.02928	0.003068	0.075806								0.060905	0.367629	0.273158	0.021462	0.172337	0.492188	0.172835	0.315504
89					0.114211	0.275728	0.2368	0.111637	0.036445	0.211198	0.096884	0.092641								0.013891	0.039929	0.12154	0.079732	0.056111	0.017339	-0.00422	0.079159								0.054657	0.35931	0.253625	0.002081	0.183926	0.481945	0.181884	0.311211
90					0.139134	0.25737	0.244449	0.099606	0.016256	0.219369	0.089405	0.096947								0.023459	0.043126	0.130206	0.094321	0.067228	0.005399	-0.01151	0.082512								0.048409	0.350991	0.234092	-0.0173	0.195515	0.471703	0.190933	0.306919
[truncated: 11 more columns]
