# Supplementary material for: ESCO1 and CTCF enable formation of long chromatin loops by protecting cohesinSTAG1 from WAPL
Source: eLife journal article supplement (doi:10.7554/elife.52091), 2020-02-17
Supplement: supp [file elife_poa_e52091_Figure_2_figure_supplement_2_source_data_1.xlsx]

## Sheet: Sheet1
time (s)	STAG1-EGFP H8 G1						STAG2-EGFP F2 G1						EGFP-STAG1 H4 G1						time (s)	STAG1-EGFP H8 G2						STAG2-EGFP F2 G2										EGFP-STAG1 H4 G2
-18.9669	0.971136	1.00145	1.01761	1.03688	1.01293	1.02831	0.968334	0.982092	0.990779	1.01145	0.969462	0.984636	0.922619	1.01476	0.987414	1.07454	0.948544		-18.9669	0.988353	0.972654	1.00843	1.05802	0.974344	0.997292	0.986926	0.966693	1.00509	1.01037	1.00504	0.975281	0.986224				1.07672	1.02745	0.988506	1.01345	1.02837	0.95263	1.01899	1.00843	1.03938	1.04141
-16.9854	1.01721	1.02817	1.05704	0.913823	1.07673	1.00232	0.971348	1.00716	0.996988	0.9422	0.997018	1.0433	0.990996	1.02481	1.01911	0.95347	1.00617		-16.9854	1.04784	1.04321	0.982192	0.998565	1.01767	0.975519	1.00584	1.01903	1.00534	1.01402	0.987043	0.984134	1.00962				1.00254	1.02399	1.02115	0.987494	0.956017	1.01016	1.02515	0.94863	1.06579	0.994692
-14.9942	1.04551	0.974434	0.964072	1.01783	1.04571	1.02247	0.97914	1.0096	0.994036	1.04422	0.97832	0.981124	1.0161	0.978063	0.985583	0.989222	1.05401		-14.9942	0.960578	0.964821	1.02183	0.94481	1.01854	0.949972	1.02055	1.00115	1.01902	1.00615	0.966563	0.999305	1.04437				0.923609	0.986297	0.967019	0.994968	0.947737	0.983876	0.984546	1.03579	0.99268	0.966928
-12.9909	0.947473	1.0283	0.941289	0.979838	0.990228	0.99582	0.999797	1.01408	1.03819	0.9897	0.999312	0.973469	1.02663	0.912425	1.05414	0.945465	0.935808		-12.9909	1.03918	1.00365	1.0121	0.979217	1.01246	1.11312	0.992025	1.00233	1.00107	1.00285	0.962266	1.00029	1.00298				0.994619	1.02052	0.992117	1.01116	1.06093	1.03505	0.99718	0.978269	1.00667	0.94062
-10.9876	0.992801	1.08193	1.01002	1.03709	0.914835	1.04177	1.03682	1.04552	1.00727	0.976173	1.00095	0.995348	1.06384	0.985177	1.00519	0.926388	1.02098		-10.9876	0.997637	0.908511	0.977448	1.07376	1.09292	1.03207	1.02759	1.00337	0.997514	0.995087	0.97137	1.01056	0.992163				0.940442	1.03096	0.976839	0.994173	0.956565	0.984786	0.954242	0.992965	1.01623	0.936918
-8.98425	1.00841	1.01061	1.00154	1.00073	0.961389	1.00685	1.04588	0.993669	1.00413	1.02208	0.989097	0.985943	0.988301	0.993549	0.962247	1.00478	1.00595		-8.98425	0.933065	1.02092	1.01305	1.03412	0.953236	0.982644	0.979421	0.994758	0.972848	0.953106	1.01885	0.992366	0.969408				0.975389	1.01019	1.01425	0.992289	1.02129	0.978479	0.992451	1.00276	1.00547	1.02645
-6.98095	0.983415	0.96687	1.01066	1.04813	0.947064	0.957157	0.961597	1.00954	0.989451	1.01223	1.01329	1.00754	0.979146	1.0335	0.997	1.04321	0.96844		-6.98095	0.965786	1.02435	0.994041	0.960633	0.935897	0.955313	0.998572	1.00984	1.01457	1.00088	1.03608	0.993474	1.00737				1.02361	1.0161	0.986656	0.910812	1.02424	1.0535	1.03559	1.01128	0.984093	1.01086
-4.98973	0.987729	0.904475	1.03113	0.950835	1.01175	0.941651	1.00054	0.973546	0.974113	0.976824	1.01427	1.0259	1.04118	1.0347	1.00111	1.00307	1.02461		-4.98973	1.00673	1.04004	0.983765	1.01068	0.989414	1.05209	0.975388	0.991819	0.985357	1.00663	1.04005	0.993877	0.963587				1.08725	0.944444	1.02675	0.948384	0.944273	1.01454	1.00326	0.987753	0.962808	1.09603
-2.98642	1.00375	0.981048	0.959644	1.00382	1.03759	1.00091	1.00545	0.972945	0.995578	1.03108	1.00949	0.986893	0.970328	1.01744	0.989976	1.03232	0.953535		-2.98642	1.03176	1.02419	0.971854	0.917988	1.014	0.958231	0.992062	0.996695	1.00316	0.999967	1.03394	1.04015	0.998274				0.95352	0.959327	1.02469	1.05686	1.05485	1.00464	1.02778	1.03426	0.973573	0.982498
-0.983115	1.04256	1.02272	1.007	1.01101	1.00177	1.00275	1.0311	0.991852	1.00947	0.994048	1.02879	1.01584	1.00085	1.00558	0.99822	1.02753	1.08195		-0.983115	1.02907	0.99765	1.0353	1.0222	0.991525	0.983747	1.02164	1.01432	0.996019	1.01094	0.978798	1.01057	1.026				1.02231	0.980727	1.00202	1.09041	1.00574	0.982323	0.960809	0.999862	0.953305	1.00359
0	0	0	0	0	0	0	0	0	0	0	0	0	0	0	0	0	0		0	0	0	0	0	0	0	0	0	0	0	0	0	0				0	0	0	0	0	0	0	0	0	0
1.01829	0.0148529	0.15864	0.0523623	0.0864433	0.0985499	0.0538039	0.170888	0.195727	0.134803	0.182017	0.188957	0.191481	0.0922325	0.0438096	0.154774	0.036694	0.144776		1.01829	0.062625	0.074871	0.083445	0.108161	0.056859	0.050613	0.06761	0.091338	0.078975	0.095966	0.157294	0.141304	0.122289				0.129577	0.07702	0.037142	0.10494	0.101675	0.046131	0.047058	0.093113	0.122866	0.007024
3.0216	0.174573	0.109381	0.130569	0.0879264	0.211334	0.047427	0.341445	0.305272	0.196086	0.366273	0.297349	0.308261	0.185292	0.145302	0.281719	0.114676	0.250347		3.0216	0.050017	0.083984	0.121964	0.104197	0.089471	0.075534	0.152176	0.129706	0.152831	0.141919	0.248994	0.200127	0.194936				0.199661	0.135678	0.131162	0.177228	0.051848	0.074245	0.046854	0.140742	0.134253	0.166166
5.01282	0.152384	0.139744	0.130093	0.120133	0.167471	0.127998	0.371987	0.390328	0.22888	0.351077	0.355488	0.374377	0.178509	0.195117	0.276556	0.193034	0.234916		5.01282	0.081973	0.140704	0.152342	0.138178	0.043583	0.021073	0.178223	0.163776	0.192685	0.177653	0.290984	0.226912	0.215329				0.119605	0.096333	0.091575	0.197012	0.137322	0.131046	0.094461	0.115674	0.153879	0.148266
7.01612	0.0941066	0.17063	0.167519	0.243923	0.196821	0.164077	0.371752	0.410303	0.293462	0.438594	0.418916	0.399935	0.214062	0.185192	0.26944	0.119756	0.148119		7.01612	0.134452	0.132738	0.120112	0.104173	0.040611	0.156146	0.211863	0.165585	0.225047	0.222068	0.299981	0.250743	0.2388				0.180966	0.083855	0.174158	0.136163	0.245034	0.110599	0.079897	0.142739	0.131817	0.082729
9.01887	0.0856531	0.215296	0.184061	0.187651	0.225038	0.0937394	0.412293	0.473297	0.315347	0.479197	0.405834	0.414346	0.222191	0.182876	0.299013	0.145948	0.184619		9.01887	0.050296	0.12094	0.143182	0.157017	0.167527	0.094538	0.215968	0.192685	0.238093	0.220829	0.335923	0.257489	0.251706				0.215496	0.080754	0.150802	0.153588	0.177667	0.082533	0.086294	0.080094	0.17643	0.148592
11.0222	0.185936	0.184906	0.209337	0.210651	0.180653	0.125541	0.437254	0.474071	0.309349	0.549777	0.459695	0.427859	0.227683	0.214012	0.319187	0.157947	0.261742		11.0222	0.049058	0.17517	0.142041	0.178584	0.140567	0.105706	0.239101	0.227473	0.261728	0.229988	0.329278	0.267049	0.297308				0.257893	0.129615	0.147971	0.195216	0.146323	0.10725	0.084338	0.129854	0.158816	0.116733
13.0267	0.203514	0.257259	0.223829	0.219516	0.223551	0.162508	0.439448	0.465396	0.320147	0.529741	0.47778	0.477376	0.22072	0.236246	0.285536	0.245739	0.284863		13.0267	0.072865	0.087518	0.162407	0.154265	0.097553	0.082704	0.27252	0.239448	0.260001	0.254006	0.343204	0.284044	0.292778				0.237748	0.097237	0.148415	0.207892	0.134431	0.091182	0.084569	0.13021	0.182009	0.128639
15.03	0.167808	0.225312	0.216114	0.20364	0.214612	0.157185	0.452007	0.530335	0.339555	0.537742	0.50829	0.475212	0.215251	0.220379	0.275986	0.106204	0.246993		15.03	0.08174	0.062058	0.149312	0.087619	0.107806	0.042407	0.275071	0.229528	0.267233	0.239848	0.364584	0.316378	0.333045				0.172776	0.138169	0.184163	0.156864	0.154025	0.104616	0.139621	0.134072	0.148989	0.077558
17.0212	0.198115	0.225095	0.224386	0.192198	0.266342	0.171	0.497258	0.527319	0.341198	0.52898	0.488746	0.47967	0.297834	0.240548	0.353818	0.17719	0.240953		17.0212	0.106321	0.192376	0.163891	0.157588	0.16276	0.098157	0.263018	0.251389	0.264423	0.254023	0.357315	0.327539	0.293555				0.23011	0.182681	0.201198	0.260036	0.246831	0.103679	0.146327	0.127455	0.122728	0.051989
19.0245	0.20299	0.264664	0.277003	0.123368	0.19735	0.191177	0.531873	0.566969	0.351585	0.538616	0.529984	0.484063	0.293834	0.255045	0.315971	0.218246	0.290409		19.0245	0.149677	0.168494	0.223603	0.178097	0.026616	0.125875	0.274194	0.271185	0.28936	0.282796	0.379751	0.348537	0.292654				0.139137	0.210169	0.151636	0.274054	0.202622	0.142346	0.073848	0.137427	0.162218	0.1081
21.0278	0.245153	0.226021	0.218955	0.252634	0.173	0.137492	0.493068	0.547502	0.367857	0.557136	0.491856	0.506501	0.244617	0.209856	0.318104	0.211407	0.217882		21.0278	0.110803	0.210879	0.206686	0.143992	0.081279	0.185193	0.264919	0.291757	0.294555	0.290777	0.389981	0.362406	0.319185				0.163684	0.180678	0.171127	0.191786	0.243033	0.130217	0.149223	0.179566	0.220685	0.086295
23.0311	0.212481	0.233724	0.273902	0.2324	0.26343	0.247542	0.525818	0.591063	0.383508	0.571028	0.539713	0.546871	0.258615	0.239102	0.342694	0.175069	0.314692		23.0311	0.128823	0.212575	0.17423	0.142195	0.133775	0.115533	0.299885	0.272145	0.307656	0.249925	0.397877	0.372837	0.337351				0.176235	0.181445	0.201645	0.189465	0.160617	0.123799	0.147381	0.112248	0.154882	0.080301
25.0344	0.216325	0.282444	0.279752	0.219384	0.223279	0.197359	0.559513	0.575505	0.373457	0.583747	0.566462	0.539945	0.294923	0.229547	0.390798	0.196838	0.319163		25.0344	0.135599	0.253692	0.156198	0.129917	0.10661	0.142445	0.307277	0.264526	0.298207	0.297835	0.415913	0.354101	0.355207				0.168956	0.155199	0.1521	0.266366	0.21657	0.128652	0.197155	0.126109	0.192859	0.125221
27.0377	0.239318	0.226415	0.275346	0.26776	0.209305	0.170488	0.539493	0.555224	0.387168	0.613455	0.531366	0.555189	0.311468	0.266655	0.383889	0.231277	0.282436		27.0377	0.065536	0.217031	0.164331	0.159873	0.117429	0.076222	0.317258	0.288025	0.314479	0.301126	0.41194	0.378365	0.30817				0.22834	0.216979	0.156672	0.205495	0.256374	0.146471	0.161209	0.124764	0.182069	0.057226
29.029	0.267102	0.246545	0.241088	0.213358	0.256581	0.18187	0.568314	0.608448	0.372954	0.655306	0.589104	0.576935	0.255792	0.276726	0.273005	0.143205	0.316688		29.029	0.061641	0.200347	0.209567	0.156141	0.073939	0.158842	0.293986	0.283615	0.339805	0.309141	0.393803	0.379767	0.361832				0.235409	0.151269	0.226535	0.190755	0.161254	0.128166	0.198536	0.141212	0.138058	0.120154
31.0323	0.285511	0.24732	0.295382	0.26264	0.224493	0.224778	0.589214	0.630845	0.398957	0.587142	0.568251	0.56356	0.264479	0.249031	0.392609	0.250501	0.400049		31.0323	0.11819	0.204708	0.203236	0.250687	0.11937	0.100079	0.30547	0.292641	0.343416	0.298326	0.397236	0.412936	0.364186				0.162706	0.147964	0.22586	0.234749	0.272066	0.140244	0.187654	0.088362	0.122848	0.08662
33.0356	0.29059	0.241854	0.255222	0.23733	0.24703	0.213295	0.575836	0.601615	0.418264	0.62358	0.596963	0.54956	0.22794	0.27561	0.38488	0.237042	0.286309		33.0356	0.042192	0.209309	0.20241	0.128666	0.111126	0.062856	0.320243	0.310929	0.349	0.312885	0.390623	0.39625	0.380986				0.195806	0.16221	0.199394	0.161936	0.273177	0.098645	0.170283	0.109536	0.184708	0.104906
35.0268	0.225451	0.247681	0.257046	0.255406	0.230873	0.235391	0.580792	0.604138	0.395145	0.596697	0.609767	0.546115	0.281812	0.273338	0.330965	0.182771	0.198055		35.0268	0.090872	0.223356	0.173841	0.187793	0.148259	0.098144	0.336665	0.299094	0.340807	0.329638	0.375919	0.397279	0.388533				0.193029	0.183418	0.207199	0.233377	0.342995	0.131944	0.185192	0.116014	0.15712	0.147286
37.0301	0.268614	0.297624	0.26273	0.216796	0.274259	0.238509	0.546733	0.613329	0.424141	0.648644	0.598859	0.56647	0.256819	0.230219	0.363958	0.204084	0.305683		37.0301	0.067655	0.266437	0.205909	0.14914	0.119604	0.191456	0.346173	0.296819	0.33037	0.366017	0.420197	0.448362	0.362365				0.236719	0.160425	0.19947	0.213967	0.213667	0.137909	0.182982	0.160161	0.26579	0.14917
39.0334	0.162964	0.302826	0.297008	0.279436	0.251384	0.236888	0.56645	0.612055	0.456827	0.65568	0.548703	0.560052	0.290581	0.23079	0.344438	0.246027	0.310047		39.0334	0.024025	0.201775	0.191566	0.167755	0.155952	0.079602	0.328988	0.314386	0.355324	0.350661	0.412533	0.442051	0.414449				0.261196	0.157173	0.205419	0.328477	0.241683	0.140596	0.224442	0.101701	0.190656	0.178189
41.0367	0.205797	0.228663	0.287331	0.243501	0.264925	0.218552	0.600701	0.633463	0.429167	0.607973	0.641133	0.601438	0.314458	0.234336	0.387282	0.240061	0.296978		41.0367	0.119919	0.213614	0.248166	0.186151	0.158704	0.099678	0.317234	0.317126	0.350463	0.349252	0.407795	0.402443	0.417475				0.2865	0.149963	0.155921	0.244963	0.184074	0.183659	0.138729	0.165877	0.144007	0.176823
43.04	0.265118	0.302882	0.302185	0.180934	0.313752	0.257552	0.632627	0.645109	0.451336	0.641926	0.629664	0.608707	0.335602	0.278418	0.357782	0.2851	0.367583		43.04	0.049092	0.195386	0.203342	0.174408	0.149351	0.114908	0.310345	0.335676	0.367158	0.35228	0.414035	0.418395	0.401487				0.206657	0.169806	0.184797	0.295474	0.207153	0.163468	0.182615	0.116234	0.223862	0.162797
45.0433	0.248086	0.240164	0.304971	0.290294	0.288432	0.273768	0.602448	0.648723	0.446942	0.616568	0.620829	0.595421	0.266482	0.250622	0.329594	0.310273	0.334028		45.0433	0.018738	0.277765	0.231064	0.200172	0.090189	0.151353	0.354181	0.338698	0.389772	0.366314	0.460851	0.400223	0.388053				0.231187	0.153522	0.18796	0.216281	0.254603	0.131434	0.155545	0.108203	0.141988	0.141198
47.0346	0.233356	0.263347	0.303263	0.245911	0.396955	0.196896	0.59603	0.685001	0.453172	0.615217	0.626915	0.585261	0.30971	0.306433	0.38628	0.23705	0.351851		47.0346	0.028132	0.218908	0.215395	0.181671	0.101326	0.096653	0.352009	0.339075	0.383483	0.35102	0.479999	0.43277	0.422383				0.245198	0.194624	0.188563	0.320853	0.16191	0.141662	0.183033	0.138429	0.236089	0.14428
49.0391	0.245543	0.268801	0.301873	0.226137	0.263645	0.291603	0.596037	0.649083	0.466631	0.639416	0.609735	0.599262	0.343966	0.299516	0.426274	0.205904	0.289493		49.0391	0.06551	0.13977	0.208266	0.170791	0.063709	0.085069	0.354611	0.331748	0.370151	0.342969	0.443004	0.423768	0.407497				0.233673	0.187431	0.187843	0.211965	0.175022	0.132425	0.153131	0.119801	0.173082	0.123836
51.0424	0.237641	0.232616	0.294768	0.281075	0.230177	0.273901	0.596567	0.68576	0.484108	0.720948	0.629737	0.616461	0.345968	0.24258	0.345483	0.210837	0.292005		51.0424	0.012341	0.284216	0.221479	0.208371	0.121416	0.158925	0.374889	0.346342	0.402388	0.386085	0.469171	0.439383	0.432332				0.311242	0.230577	0.193016	0.308914	0.187046	0.140272	0.107883	0.216657	0.21907	0.086495
53.0457	0.344479	0.29837	0.326176	0.288939	0.331946	0.31046	0.626281	0.68764	0.503262	0.644763	0.618709	0.602833	0.25659	0.275233	0.324546	0.246114	0.325885		53.0457	-0.06627	0.191194	0.257815	0.203068	0.08855	0.089857	0.391237	0.351729	0.412658	0.38695	0.505566	0.456033	0.440686				0.266382	0.177203	0.2267	0.240707	0.240817	0.16102	0.211639	0.128422	0.235564	0.110157
55.0369	0.234154	0.270646	0.276148	0.270349	0.297778	0.270534	0.599742	0.67349	0.477178	0.622786	0.657877	0.634057	0.343198	0.26705	0.372084	0.232847	0.263842		55.0369	0.01694	0.26312	0.30924	0.193332	0.190403	0.180951	0.402128	0.364741	0.407185	0.406038	0.496375	0.455503	0.440608				0.245258	0.073183	0.27751	0.272053	0.244314	0.185786	0.180965	0.128564	0.200512	0.121771
57.0402	0.340854	0.32926	0.273832	0.26081	0.332066	0.273854	0.616043	0.713113	0.491288	0.6773	0.683736	0.615802	0.307146	0.272231	0.368192	0.220717	0.309224		57.0402	0.036769	0.2559	0.2463	0.205049	0.10829	0.095528	0.374204	0.336881	0.423526	0.410999	0.464132	0.472522	0.422118				0.273793	0.182063	0.241164	0.278573	0.218709	0.180097	0.224809	0.224338	0.236116	0.045526
59.0435	0.310526	0.258964	0.292945	0.326654	0.255635	0.219421	0.587306	0.672487	0.471034	0.721669	0.685016	0.634725	0.325927	0.305844	0.332797	0.263286	0.296379		59.0435	0.095006	0.225696	0.219721	0.17765	0.128261	0.15431	0.388322	0.351019	0.412216	0.396834	0.489486	0.465881	0.42705				0.260597	0.211513	0.221676	0.211955	0.14095	0.194331	0.125298	0.193133	0.239922	0.180658
61.0468	0.322587	0.352513	0.265196	0.209713	0.289089	0.302256	0.64573	0.703256	0.474622	0.689556	0.664789	0.661767	0.330714	0.279186	0.353791	0.234955	0.345465		61.0468	0.042297	0.302161	0.257468	0.15595	0.123725	0.209582	0.425085	0.35834	0.441196	0.411988	0.463286	0.473518	0.420783				0.227064	0.222345	0.207019	0.287366	0.263295	0.159408	0.164831	0.132087	0.240839	0.152907
63.0501	0.29362	0.294177	0.263777	0.271392	0.313482	0.302816	0.620954	0.686807	0.511764	0.670046	0.682272	0.654124	0.272979	0.276085	0.351956	0.266373	0.310491		63.0501	0.0944	0.26226	0.274123	0.208621	0.176137	0.179934	0.372569	0.352925	0.408533	0.415426	0.482129	0.491191	0.442052				0.276031	0.233428	0.246932	0.176341	0.224264	0.16675	0.164073	0.212267	0.207998	0.125581
65.0534	0.294798	0.365042	0.277588	0.260319	0.289912	0.277615	0.652735	0.690058	0.510904	0.672769	0.692737	0.66972	0.307083	0.330804	0.407505	0.2248	0.285504		65.0534	0.078168	0.294549	0.245551	0.215677	0.130932	0.156772	0.414672	0.351488	0.41606	0.456468	0.490952	0.49616	0.440285				0.239219	0.150606	0.213959	0.23167	0.233416	0.153309	0.218497	0.178091	0.163782	0.140897
67.0446	0.308866	0.326726	0.313622	0.296785	0.263531	0.278465	0.642925	0.716045	0.507027	0.707219	0.704781	0.699501	0.305292	0.304969	0.338859	0.235453	0.296101		67.0446	0.114486	0.266892	0.242521	0.207614	0.060597	0.073932	0.396024	0.372259	0.424152	0.443276	0.503141	0.522132	0.426537				0.277631	0.203154	0.262567	0.258891	0.16526	0.200248	0.174209	0.182442	0.239651	0.154497
69.0479	0.305878	0.344882	0.322745	0.327153	0.280693	0.241888	0.697102	0.709102	0.527335	0.662853	0.691834	0.684694	0.31183	0.256076	0.357975	0.303025	0.349633		69.0479	0.096736	0.259664	0.204437	0.157138	0.151492	0.142128	0.446592	0.37583	0.403025	0.424452	0.503043	0.532418	0.45526				0.231726	0.189447	0.205051	0.232708	0.153725	0.122101	0.180114	0.167046	0.224836	0.197257
71.0512	0.254471	0.390308	0.292743	0.309727	0.31896	0.298063	0.674639	0.71884	0.521625	0.67596	0.736267	0.674843	0.317207	0.32165	0.359994	0.29228	0.31757		71.0512	-0.00212	0.250626	0.267909	0.222112	0.166639	0.167468	0.439568	0.379811	0.437717	0.428823	0.495177	0.5046	0.463407				0.307782	0.136629	0.198617	0.262532	0.231732	0.155204	0.1863	0.186775	0.178869	0.145221
73.0546	0.288362	0.35148	0.326747	0.314288	0.334893	0.308317	0.638932	0.706534	0.523702	0.691677	0.726291	0.654919	0.33465	0.295263	0.446062	0.287833	0.292718		74.0502	0.116792	0.282295	0.244955	0.209056	0.165963	0.147525	0.440055	0.387627	0.440888	0.418269	0.500459	0.524964	0.439818				0.25107	0.229845	0.250128	0.209255	0.264809	0.166261	0.1893	0.194492	0.224001	0.098986
75.0458	0.259278	0.381868	0.287875	0.252091	0.385066	0.23271	0.672018	0.72795	0.547616	0.721078	0.726211	0.671328	0.363243	0.271138	0.305754	0.201896	0.407247
77.0491	0.356688	0.339984	0.3085	0.343566	0.291704	0.224972	0.692151	0.733452	0.538572	0.766363	0.697529	0.685631	0.348243	0.318631	0.400877	0.267028	0.381337		78.0507	0.061291	0.2674	0.283183	0.247634	0.077388	0.154102	0.457002	0.396005	0.448868	0.436336	0.509216	0.55373	0.435795				0.276803	0.176594	0.219219	0.266114	0.24939	0.164669	0.215037	0.183271	0.196314	0.119295
79.0524	0.317775	0.429384	0.317923	0.257011	0.321699	0.298861	0.676379	0.714252	0.521084	0.765754	0.693256	0.654716	0.302151	0.273415	0.373956	0.305722	0.303165
81.0557	0.31679	0.367512	0.287323	0.200531	0.327616	0.301358	0.653943	0.723464	0.520251	0.676251	0.728478	0.676729	0.373984	0.276006	0.432033	0.303046	0.327287		82.058	0.105303	0.289791	0.274484	0.231767	0.17824	0.191347	0.460974	0.417821	0.463035	0.452372	0.531242	0.520628	0.447789				0.259279	0.192378	0.241982	0.254328	0.255645	0.180919	0.204669	0.174305	0.154164	0.182741
83.0602	0.335542	0.30585	0.330284	0.27904	0.329774	0.274352	0.656353	0.723815	0.550502	0.724071	0.747655	0.699849	0.308392	0.306443	0.4502	0.218132	0.284631
85.0514	0.277982	0.316254	0.300362	0.279671	0.319358	0.268256	0.689612	0.719076	0.552543	0.778743	0.736833	0.709472	0.329628	0.28747	0.459113	0.370397	0.295026		86.0531	0.119518	0.299011	0.290934	0.208226	0.171334	0.139244	0.486254	0.401507	0.49298	0.448796	0.52545	0.561709	0.456945				0.309062	0.274562	0.229187	0.334364	0.260831	0.154819	0.183541	0.218785	0.205345	0.185753
87.0547	0.260278	0.317181	0.368782	0.254886	0.358204	0.323648	0.687271	0.725106	0.572124	0.757953	0.783026	0.706376	0.344937	0.268858	0.420097	0.29041	0.350522
89.058	0.295602	0.30993	0.325329	0.362891	0.283083	0.278906	0.67356	0.756452	0.564913	0.744182	0.780725	0.692071	0.323658	0.338062	0.444362	0.324792	0.295062		90.0597	0.07289	0.299147	0.296757	0.217513	0.171071	0.222508	0.487772	0.421969	0.496036	0.472566	0.550325	0.535979	0.492237				0.295749	0.212734	0.274133	0.309284	0.270211	0.167967	0.2164	0.231428	0.204291	0.154479
91.0613	0.306276	0.312719	0.328511	0.315889	0.292878	0.326493	0.693105	0.769318	0.547673	0.754242	0.748141	0.709214	0.33279	0.237055	0.486365	0.255884	0.368555
93.0646	0.263666	0.33981	0.347263	0.264972	0.3365	0.310403	0.69586	0.746428	0.570763	0.80235	0.788332	0.724312	0.357536	0.304955	0.381758	0.319456	0.408627		94.0602	0.050182	0.273656	0.29006	0.227811	0.166163	0.168524	0.505918	0.431266	0.504103	0.4713	0.531881	0.571082	0.477644				0.298669	0.222148	0.26712	0.30357	0.263237	0.193549	0.220582	0.23343	0.218776	0.212075
95.0559	0.394857	0.273251	0.339472	0.276264	0.310917	0.284247	0.708071	0.78856	0.574951	0.738279	0.73791	0.732746	0.362335	0.250674	0.417598	0.231781	0.416216
97.0592	0.284036	0.409593	0.346109	0.342035	0.295879	0.298814	0.742528	0.761884	0.57625	0.725955	0.774882	0.735809	0.399028	0.321787	0.430863	0.194753	0.294517		98.0608	0.086388	0.244215	0.308495	0.231352	0.168006	0.207412	0.503569	0.429883	0.480762	0.48946	0.537249	0.545982	0.500627				0.265351	0.219042	0.259141	0.318901	0.321651	0.170657	0.232516	0.189096	0.175636	0.18983
99.0625	0.34829	0.405901	0.343918	0.334387	0.346723	0.348377	0.722238	0.778842	0.5827	0.747645	0.738157	0.729467	0.389343	0.296821	0.463452	0.242108	0.362827
101.066	0.331737	0.351614	0.354191	0.29212	0.375762	0.289844	0.729306	0.782445	0.578278	0.732406	0.788257	0.666292	0.405877	0.298332	0.404049	0.302297	0.398983		102.067	0.105109	0.275325	0.310774	0.222974	0.183956	0.182797	0.516593	0.445718	0.509926	0.501189	0.544874	0.570995	0.479273				0.285483	0.25663	0.272005	0.349187	0.291472	0.210767	0.198291	0.238889	0.200226	0.222003
103.069	0.327302	0.373267	0.376552	0.376291	0.311055	0.270271	0.708163	0.760539	0.593831	0.75964	0.784973	0.736754	0.380118	0.288622	0.388455	0.278068	0.318524
105.06	0.282816	0.285524	0.350332	0.327397	0.352066	0.315865	0.720963	0.762922	0.605045	0.781636	0.781431	0.747448	0.366344	0.305339	0.405907	0.30066	0.420933		106.062	0.114927	0.275162	0.279343	0.278165	0.137481	0.198485	0.500559	0.473384	0.491949	0.485686	0.558775	0.588953	0.466047				0.263977	0.226777	0.26524	0.323084	0.277755	0.196348	0.205756	0.230222	0.163853	0.229358
107.064	0.305567	0.343498	0.345004	0.277636	0.330917	0.32621	0.725374	0.750919	0.598174	0.749011	0.782143	0.696022	0.344661	0.354328	0.406796	0.302941	0.393136
109.067	0.329693	0.38208	0.33557	0.291373	0.369664	0.327796	0.735929	0.766166	0.575303	0.722995	0.727371	0.718202	0.416582	0.290726	0.410543	0.290579	0.36428		110.069	0.097015	0.283431	0.272816	0.238758	0.136873	0.192441	0.52156	0.449884	0.498234	0.528206	0.559339	0.59148	0.504386				0.285321	0.238382	0.250645	0.323546	0.377257	0.202	0.230153	0.211605	0.200667	0.19413
111.07	0.328464	0.314424	0.379563	0.259852	0.459653	0.28895	0.726353	0.795732	0.593008	0.786025	0.77361	0.726109	0.353321	0.281589	0.439022	0.263578	0.341046
113.073	0.364502	0.391244	0.333405	0.378851	0.333424	0.315554	0.783891	0.754294	0.594839	0.743476	0.827281	0.711652	0.321432	0.342585	0.391897	0.311543	0.317541		114.076	0.147987	0.274145	0.299468	0.275866	0.257946	0.223677	0.523194	0.483373	0.505996	0.539865	0.566087	0.590426	0.524246				0.261122	0.222765	0.277831	0.301641	0.241382	0.201969	0.212542	0.21321	0.241431	0.143151
115.078	0.315122	0.350631	0.364561	0.373797	0.307069	0.317629	0.700962	0.735158	0.590319	0.729203	0.813529	0.724829	0.332794	0.333148	0.424922	0.289533	0.324674
117.068	0.316639	0.34183	0.336103	0.322929	0.356901	0.279477	0.686804	0.754311	0.6096	0.792232	0.808952	0.705083	0.346685	0.35342	0.404429	0.312094	0.365233		118.07	0.170982	0.283705	0.323595	0.249833	0.127509	0.213869	0.528888	0.473506	0.522326	0.522353	0.580195	0.588093	0.505805				0.291924	0.231443	0.246313	0.312742	0.274192	0.192047	0.207647	0.210009	0.219302	0.199104
119.073	0.311103	0.283369	0.367109	0.316437	0.380972	0.313375	0.758425	0.783024	0.632083	0.79928	0.832553	0.734616	0.378067	0.30179	0.470381	0.28326	0.321514
121.076	0.32409	0.432808	0.423211	0.349675	0.349789	0.324517	0.744474	0.738572	0.593798	0.731553	0.765025	0.78173	0.36043	0.296112	0.43561	0.32211	0.310565		122.078	0.110575	0.277874	0.339305	0.235278	0.13886	0.145148	0.528634	0.487871	0.528643	0.537415	0.574171	0.604966	0.501308				0.349222	0.265244	0.264873	0.337985	0.256322	0.223882	0.243635	0.207787	0.236697	0.199732
123.079	0.330828	0.401913	0.446604	0.367739	0.354679	0.272587	0.768471	0.745043	0.613307	0.762207	0.789254	0.727741	0.33059	0.339824	0.453139	0.297753	0.372589
125.082	0.338319	0.407963	0.349531	0.387995	0.312597	0.308981	0.727632	0.798818	0.616641	0.812088	0.86066	0.713083	0.344642	0.325135	0.456208	0.22303	0.305789		126.078	0.202639	0.292555	0.272606	0.254883	0.185239	0.145061	0.517554	0.498398	0.521864	0.556715	0.605225	0.593031	0.530428				0.299186	0.242751	0.275582	0.341889	0.267274	0.221013	0.221507	0.196589	0.247436	0.207793
127.074	0.358491	0.351037	0.381166	0.40228	0.366134	0.303458	0.747785	0.742786	0.634108	0.786109	0.766553	0.726398	0.426648	0.379904	0.452074	0.257118	0.408925
129.077	0.354636	0.346508	0.353998	0.335341	0.35919	0.352757	0.74528	0.787598	0.6075	0.841878	0.821144	0.768967	0.428077	0.37586	0.440546	0.332477	0.376961		130.079	0.141217	0.322017	0.299603	0.244238	0.18826	0.202908	0.521604	0.497943	0.543074	0.563682	0.622278	0.596407	0.549447				0.258861	0.264054	0.259236	0.322352	0.287369	0.172282	0.250484	0.187525	0.269607	0.142619
131.08	0.372624	0.338454	0.338683	0.302715	0.343831	0.289755	0.799697	0.772872	0.635038	0.813228	0.857577	0.708509	0.312256	0.299467	0.443365	0.256861	0.289707
133.084	0.347072	0.345775	0.409011	0.357916	0.309972	0.365005	0.799267	0.816503	0.613669	0.792947	0.863924	0.78943	0.342179	0.298498	0.470492	0.259589	0.402306		134.085	0.193931	0.34021	0.296375	0.294587	0.20727	0.180992	0.496788	0.481636	0.535732	0.574164	0.601505	0.582556	0.540941				0.317054	0.283342	0.265135	0.368593	0.291575	0.178286	0.195449	0.228139	0.243614	0.180918
135.087	0.380322	0.378007	0.375449	0.347822	0.322834	0.401164	0.797035	0.786622	0.649781	0.826025	0.793999	0.763725	0.378631	0.327421	0.413957	0.286689	0.381146
137.078	0.352123	0.31562	0.405493	0.359926	0.347771	0.373702	0.760133	0.797295	0.614544	0.819877	0.852355	0.740566	0.392852	0.280266	0.536676	0.317211	0.328698		138.08	0.134478	0.231623	0.258895	0.320814	0.131831	0.224951	0.544247	0.504234	0.542727	0.553332	0.596592	0.612647	0.552223				0.308085	0.313781	0.232913	0.342141	0.317054	0.229345	0.252312	0.180634	0.249301	0.220123
139.082	0.41438	0.383558	0.353936	0.372018	0.298211	0.379067	0.727084	0.784217	0.631051	0.768341	0.811483	0.749075	0.429701	0.320803	0.414274	0.287871	0.3266
141.085	0.389047	0.431177	0.403559	0.396705	0.320319	0.340224	0.786464	0.730761	0.616782	0.840493	0.801794	0.775405	0.396769	0.300557	0.417951	0.269294	0.379761		142.087	0.180583	0.317814	0.277325	0.341505	0.167991	0.161257	0.529819	0.523843	0.560132	0.590894	0.616926	0.639501	0.551297				0.335723	0.31051	0.244745	0.371685	0.295026	0.195351	0.218546	0.208596	0.231236	0.249711
143.088	0.38479	0.408594	0.348993	0.281546	0.3722	0.322742	0.774997	0.771527	0.615454	0.808624	0.837638	0.760688	0.361688	0.334032	0.414478	0.311673	0.322453
145.091	0.367827	0.420108	0.398837	0.355882	0.382007	0.343215	0.767785	0.769573	0.636025	0.842939	0.859006	0.728527	0.309718	0.321676	0.484835	0.25183	0.363974		146.087	0.252544	0.315698	0.291313	0.232549	0.193947	0.221762	0.571743	0.549255	0.574497	0.577795	0.597025	0.594109	0.551006				0.345051	0.253676	0.219496	0.361443	0.35025	0.222527	0.22388	0.230832	0.29023	0.195828
147.083	0.358892	0.403853	0.367865	0.343781	0.337188	0.368807	0.764869	0.823323	0.643996	0.796726	0.856246	0.717799	0.371705	0.427291	0.407121	0.319213	0.406721
149.086	0.36466	0.42654	0.389214	0.324122	0.39241	0.350204	0.768481	0.763447	0.641885	0.87146	0.795099	0.747846	0.426323	0.397343	0.541526	0.274915	0.355299		150.088	0.272288	0.261772	0.269329	0.242201	0.197043	0.22727	0.558952	0.541751	0.580176	0.58717	0.633941	0.640841	0.578474				0.319032	0.280683	0.272717	0.327985	0.34695	0.219938	0.223419	0.160642	0.271104	0.204559
151.09	0.329644	0.353912	0.406156	0.383269	0.397562	0.28551	0.788761	0.764822	0.668353	0.788349	0.826288	0.760338	0.399622	0.291432	0.455965	0.336602	0.293313
153.094	0.381384	0.367741	0.345349	0.411341	0.387154	0.342758	0.772842	0.790458	0.665194	0.83302	0.811363	0.760368	0.465848	0.413012	0.479932	0.248639	0.346476		154.095	0.288047	0.284449	0.295731	0.297394	0.160414	0.175859	0.562747	0.527034	0.586885	0.597693	0.617029	0.670551	0.553303				0.343123	0.227031	0.290071	0.35915	0.330222	0.200034	0.223886	0.172466	0.326181	0.193726
155.097	0.33456	0.465204	0.403459	0.30656	0.380818	0.369542	0.775736	0.728357	0.631305	0.815012	0.833285	0.783082	0.420015	0.356967	0.499276	0.359468	0.382842
157.088	0.361227	0.479632	0.346372	0.33468	0.377475	0.42591	0.791141	0.825378	0.70239	0.856008	0.881585	0.762818	0.43763	0.386297	0.488812	0.298425	0.296249		158.09	0.203951	0.295356	0.287815	0.278388	0.205619	0.217529	0.586296	0.540754	0.585982	0.589264	0.601983	0.638875	0.562703				0.351687	0.250694	0.259394	0.368422	0.311355	0.193011	0.238557	0.22465	0.295434	0.251359
159.091	0.390074	0.319361	0.377943	0.362925	0.354205	0.366281	0.800604	0.814774	0.646793	0.833998	0.880055	0.779618	0.429436	0.36624	0.452753	0.364489	0.300941
161.095	0.334465	0.31999	0.405605	0.259483	0.343827	0.285538	0.796155	0.805586	0.658065	0.848437	0.87271	0.791978	0.360383	0.340701	0.406662	0.280318	0.357093		162.096	0.241854	0.310783	0.289665	0.261582	0.217424	0.240597	0.592108	0.559924	0.580147	0.612616	0.628764	0.639177	0.534558				0.364711	0.296666	0.243117	0.365417	0.343796	0.197312	0.215604	0.233778	0.261654	0.250304
163.098	0.381332	0.388759	0.419185	0.352795	0.396808	0.318876	0.798967	0.815867	0.66325	0.846569	0.818362	0.778542	0.422215	0.29491	0.507984	0.275333	0.390192
165.101	0.362321	0.333487	0.458362	0.350229	0.407156	0.419545	0.794464	0.813504	0.682943	0.854918	0.853637	0.802889	0.452843	0.417831	0.445461	0.266766	0.337368		166.097	0.277883	0.296053	0.233557	0.260516	0.223048	0.201751	0.58249	0.571182	0.579463	0.623524	0.608017	0.641104	0.552932				0.29908	0.273232	0.264795	0.376258	0.313988	0.223694	0.253495	0.212527	0.302372	0.237571
167.093	0.373717	0.313886	0.402783	0.321762	0.361899	0.423543	0.804993	0.79652	0.685036	0.791184	0.872438	0.779656	0.483444	0.386687	0.499762	0.3741	0.343091
169.096	0.40747	0.366176	0.40121	0.40405	0.369591	0.363794	0.821904	0.808221	0.685995	0.839813	0.823497	0.757956	0.41686	0.353795	0.407539	0.25964	0.365648		170.098	0.266671	0.322369	0.296483	0.248565	0.250926	0.230473	0.588125	0.573735	0.584118	0.621531	0.656294	0.660663	0.551266				0.219471	0.297458	0.239846	0.382908	0.265524	0.218629	0.223269	0.207712	0.260597	0.1917
171.099	0.419206	0.385582	0.444894	0.34934	0.400722	0.422015	0.8307	0.800385	0.678531	0.863394	0.878284	0.829377	0.45143	0.354723	0.488498	0.336802	0.376134
173.103	0.378387	0.317665	0.4331	0.357567	0.453168	0.385866	0.816503	0.817581	0.684581	0.818653	0.888599	0.814326	0.444792	0.327839	0.507102	0.396329	0.353512		175.102	0.237577	0.263084	0.280923	0.248244	0.227671	0.252178	0.57595	0.586073	0.60352	0.63893	0.631869	0.644966	0.5959				0.302297	0.31845	0.282871	0.307447	0.34582	0.245591	0.251609	0.223374	0.287488	0.206884
175.106	0.428392	0.380734	0.431993	0.384424	0.434654	0.405858	0.842748	0.834146	0.665791	0.823192	0.83783	0.819601	0.442118	0.381988	0.485105	0.3794	0.326191
177.097	0.366437	0.382518	0.396682	0.322615	0.378047	0.355189	0.810845	0.787515	0.680234	0.87549	0.814202	0.759973	0.387755	0.401553	0.495487	0.334841	0.350313
179.1	0.363486	0.439125	0.44978	0.384275	0.442219	0.330712	0.788562	0.826272	0.672409	0.806902	0.885523	0.734348	0.418374	0.356641	0.454481	0.355268	0.328022		181.104	0.248356	0.299831	0.272575	0.250674	0.252245	0.226863	0.60504	0.576422	0.576267	0.618663	0.654836	0.682392	0.603791				0.314302	0.359657	0.254523	0.375865	0.323398	0.224655	0.222347	0.224334	0.280952	0.263148
181.104	0.375829	0.401016	0.39943	0.362354	0.419472	0.39277	0.794157	0.794921	0.692714	0.815083	0.888279	0.75773	0.403316	0.328149	0.493847	0.367484	0.404777
183.108	0.362787	0.468845	0.385925	0.309026	0.401676	0.435775	0.804974	0.823075	0.68713	0.817277	0.815824	0.747706	0.451199	0.437868	0.482688	0.350791	0.274479
185.098	0.349473	0.340569	0.485537	0.346543	0.335717	0.44841	0.857442	0.799801	0.681826	0.906306	0.887678	0.797262	0.430947	0.385288	0.550296	0.421682	0.40947		187.102	0.201316	0.313667	0.271394	0.341049	0.204373	0.242276	0.60393	0.580701	0.599427	0.643913	0.648597	0.685763	0.593003				0.288163	0.35149	0.302088	0.408573	0.301571	0.231814	0.247441	0.239141	0.353576	0.215884
187.103	0.402785	0.381464	0.477513	0.441486	0.410149	0.427996	0.860728	0.783382	0.689015	0.869698	0.908671	0.77659	0.441524	0.365962	0.473017	0.329044	0.398998
189.106	0.395444	0.426228	0.412231	0.419649	0.359438	0.414796	0.835965	0.791332	0.702452	0.859121	0.891371	0.770998	0.48513	0.398718	0.48451	0.402232	0.434001
191.109	0.420713	0.392073	0.388031	0.417451	0.349053	0.486936	0.839725	0.788105	0.686167	0.836737	0.885174	0.779793	0.493856	0.38474	0.50865	0.287984	0.408079		193.109	0.291933	0.293187	0.321268	0.289383	0.301963	0.187227	0.619188	0.577448	0.60401	0.617394	0.657564	0.681023	0.623559				0.323828	0.330983	0.253501	0.439793	0.314018	0.224486	0.252063	0.249169	0.318144	0.235046
193.113	0.436524	0.423473	0.415905	0.403311	0.36986	0.531475	0.826357	0.817486	0.712976	0.900038	0.844193	0.813211	0.426231	0.368134	0.49744	0.449576	0.5045
195.104	0.390816	0.330686	0.451283	0.420816	0.418646	0.423518	0.80301	0.825792	0.744658	0.870709	0.775246	0.805587	0.477699	0.355244	0.526315	0.262292	0.514399
197.119	0.377852	0.430344	0.460441	0.41028	0.33767	0.43295	0.824615	0.834998	0.741092	0.869134	0.857189	0.815495	0.451567	0.369583	0.512918	0.353706	0.386577		199.114	0.243247	0.336534	0.298754	0.318123	0.282466	0.24034	0.625222	0.602573	0.605258	0.650286	0.673749	0.659062	0.624545				0.297896	0.340869	0.272502	0.343166	0.303491	0.22735	0.269807	0.21888	0.31409	0.290255
199.111	0.432016	0.397394	0.422414	0.399556	0.421608	0.445031	0.836931	0.815465	0.692414	0.83706	0.825545	0.812781	0.388625	0.375668	0.516475	0.311588	0.421718
201.114	0.367792	0.404151	0.484521	0.404041	0.334411	0.39965	0.873237	0.83862	0.713203	0.881341	0.897373	0.762993	0.405652	0.428613	0.531662	0.371232	0.404751
203.117	0.405664	0.435768	0.39952	0.351312	0.416597	0.453997	0.825292	0.814119	0.715829	0.844738	0.897498	0.773608	0.485903	0.383278	0.521603	0.372038	0.52364		205.116	0.270327	0.354609	0.303858	0.28827	0.247829	0.243283	0.607783	0.597207	0.62006	0.637399	0.675938	0.668732	0.613564				0.336	0.360359	0.27785	0.412983	0.32399	0.222846	0.275075	0.2522	0.297192	0.244837
205.12	0.491733	0.428473	0.422351	0.336329	0.3882	0.473141	0.851271	0.817633	0.717866	0.832204	0.878301	0.767617	0.446575	0.339624	0.50644	0.326055	0.460881
207.112	0.375086	0.378664	0.498407	0.35095	0.38958	0.42609	0.82382	0.873737	0.700963	0.820484	0.860012	0.791173	0.43059	0.372472	0.479239	0.320782	0.324071
209.115	0.395995	0.41613	0.506697	0.336187	0.388732	0.46479	0.832181	0.82511	0.713517	0.822663	0.879619	0.818755	0.511596	0.3353	0.491517	0.440955	0.439107		211.118	0.278461	0.298733	0.310016	0.289937	0.255685	0.294083	0.638034	0.614731	0.628377	0.652805	0.668939	0.692119	0.643848				0.318008	0.35562	0.304414	0.391339	0.310296	0.216976	0.264376	0.218479	0.336581	0.230649
211.118	0.386906	0.477884	0.434039	0.413976	0.439272	0.464062	0.846257	0.855178	0.70968	0.808714	0.897884	0.758189	0.419582	0.437011	0.46519	0.329231	0.424105
213.122	0.380802	0.51726	0.364459	0.38507	0.397901	0.436773	0.825575	0.84334	0.740138	0.874963	0.918613	0.756077	0.43062	0.388409	0.541888	0.447915	0.443534
215.113	0.3799	0.390663	0.465724	0.394474	0.368122	0.413795	0.851023	0.820044	0.733171	0.899155	0.902931	0.800758	0.494359	0.354489	0.494074	0.387099	0.434827		217.117	0.290682	0.324454	0.339119	0.299784	0.259037	0.273198	0.672126	0.607723	0.641317	0.653172	0.700955	0.708898	0.647852				0.337741	0.311014	0.306353	0.385516	0.317542	0.211494	0.311902	0.233475	0.280809	0.261365
217.116	0.403386	0.408159	0.478828	0.387032	0.413492	0.339329	0.847603	0.861115	0.715153	0.850079	0.881382	0.767275	0.444845	0.386445	0.610375	0.390755	0.371226
219.121	0.396645	0.415473	0.395388	0.295014	0.41356	0.438545	0.848648	0.885401	0.732334	0.853531	0.884338	0.768357	0.437168	0.352641	0.580405	0.270645	0.391837
221.124	0.33654	0.476351	0.457	0.420741	0.41509	0.424074	0.86992	0.840499	0.714856	0.831952	0.892501	0.772728	0.481139	0.387922	0.4737	0.432188	0.398891		223.123	0.198669	0.340042	0.339687	0.265319	0.267386	0.282297	0.632309	0.615017	0.633952	0.646741	0.66926	0.698904	0.645895				0.284425	0.389822	0.329571	0.372067	0.350569	0.246091	0.276073	0.254336	0.285786	0.223689
223.127	0.407857	0.432238	0.420648	0.338191	0.356413	0.445208	0.857807	0.859563	0.743388	0.880892	0.879198	0.796854	0.477837	0.343109	0.518003	0.387047	0.440659
225.118	0.494182	0.432808	0.428302	0.359563	0.420246	0.441884	0.833287	0.83509	0.740095	0.894607	0.899609	0.781863	0.380451	0.369089	0.582491	0.427943	0.289668
227.122	0.417039	0.429355	0.538577	0.39375	0.408353	0.429276	0.854986	0.863002	0.723955	0.889696	0.943265	0.804057	0.498864	0.344621	0.535173	0.315247	0.431322		229.125	0.256804	0.329459	0.342819	0.30598	0.249783	0.241603	0.655538	0.610623	0.623382	0.662785	0.661456	0.688134	0.65538				0.306358	0.260729	0.30578	0.387226	0.302445	0.23444	0.283945	0.214644	0.28254	0.280646
229.125	0.370956	0.448211	0.412741	0.364364	0.456921	0.440777	0.851092	0.863355	0.747056	0.821445	0.920456	0.801432	0.530268	0.380221	0.528352	0.45656	0.402651
231.128	0.407174	0.440815	0.436831	0.341788	0.35439	0.458351	0.830069	0.824809	0.736753	0.851473	0.924418	0.780214	0.439252	0.356791	0.551028	0.382385	0.431874
233.132	0.398747	0.478403	0.473688	0.409313	0.491568	0.427189	0.88117	0.853661	0.738774	0.858321	0.926598	0.793904	0.472058	0.344226	0.509857	0.448876	0.404177		235.127	0.278608	0.314282	0.341829	0.280887	0.290135	0.247015	0.634938	0.646347	0.625604	0.677709	0.677893	0.691075	0.685758				0.323385	0.35413	0.268183	0.388085	0.349213	0.249782	0.269602	0.227291	0.30005	0.266197
235.123	0.365205	0.476713	0.498436	0.45751	0.354713	0.454763	0.870187	0.85596	0.746502	0.816936	0.860805	0.803534	0.494252	0.391875	0.525675	0.404904	0.366149
237.126	0.462697	0.479417	0.546673	0.354683	0.385341	0.460205	0.868127	0.879544	0.745393	0.83945	0.91192	0.831242	0.482897	0.395816	0.546713	0.347051	0.44971
239.13	0.451856	0.380539	0.495488	0.384778	0.465435	0.433986	0.864829	0.876531	0.701453	0.857482	0.871131	0.820138	0.466805	0.450775	0.553174	0.374633	0.377565		241.133	0.249749	0.341309	0.334083	0.299469	0.239684	0.269253	0.655446	0.635274	0.661318	0.674471	0.688251	0.693405	0.63372				0.343219	0.343417	0.296581	0.334981	0.320506	0.214205	0.283082	0.291364	0.321567	0.279077
241.133	0.461497	0.407193	0.495607	0.345963	0.39789	0.515593	0.850648	0.859262	0.742704	0.887895	0.915835	0.811644	0.495794	0.400072	0.54254	0.383771	0.452509
243.136	0.406407	0.418413	0.491845	0.381488	0.412325	0.492472	0.838059	0.85933	0.725391	0.863708	0.88971	0.811105	0.523557	0.347495	0.554021	0.360827	0.405505
245.127	0.50308	0.49041	0.445198	0.400473	0.436006	0.476328	0.872867	0.859083	0.740126	0.838831	0.924303	0.781432	0.409064	0.423421	0.453936	0.460836	0.389965		247.131	0.31645	0.335362	0.40709	0.322254	0.27204	0.257344	0.651274	0.643966	0.654854	0.689634	0.691227	0.684206	0.683829				0.333594	0.356274	0.293794	0.393745	0.288956	0.239266	0.255113	0.281045	0.325636	0.285863
247.131	0.405889	0.445615	0.526716	0.470401	0.472863	0.398499	0.850101	0.875193	0.753993	0.942979	0.919959	0.816922	0.456487	0.445723	0.575247	0.422325	0.41183
249.134	0.382592	0.466006	0.462114	0.437001	0.419211	0.503263	0.839848	0.856019	0.782682	0.945625	0.944286	0.774883	0.436216	0.484958	0.588948	0.365643	0.48256
251.138	0.480287	0.469236	0.535706	0.402802	0.40525	0.499096	0.870608	0.865492	0.72483	0.925487	0.915541	0.820369	0.517341	0.369683	0.616661	0.429525	0.460393		253.142	0.294859	0.3288	0.357993	0.321436	0.258725	0.276548	0.66108	0.660445	0.630747	0.681479	0.700766	0.66599	0.678124				0.334517	0.356563	0.310942	0.420724	0.295148	0.218745	0.269153	0.244017	0.342626	0.26389
253.142	0.38869	0.45484	0.49595	0.474069	0.428303	0.469854	0.865819	0.849292	0.738837	0.933525	0.941921	0.836117	0.452489	0.453147	0.537766	0.417479	0.442039
255.145	0.463585	0.438628	0.517145	0.487999	0.389459	0.426451	0.863076	0.851445	0.780854	0.922193	0.908281	0.80702	0.524586	0.420024	0.506817	0.44431	0.476617
257.148	0.445731	0.489634	0.50348	0.37489	0.413211	0.477709	0.858609	0.851446	0.750085	0.887897	0.927882	0.80888	0.433254	0.39834	0.531145	0.35543	0.432296		259.144	0.377415	0.399882	0.380805	0.303253	0.259712	0.320857	0.67064	0.641273	0.645021	0.66788	0.705803	0.680437	0.683446				0.374656	0.371031	0.291824	0.408785	0.315693	0.253497	0.238046	0.293305	0.327368	0.292753
259.14	0.476917	0.466519	0.468973	0.467023	0.375388	0.491152	0.855847	0.895079	0.781854	0.918144	0.90916	0.79741	0.488804	0.434427	0.538874	0.391648	0.322588
261.143	0.460052	0.526657	0.528648	0.461011	0.425575	0.488097	0.857421	0.889872	0.762986	0.916161	0.877718	0.786818	0.532183	0.378791	0.583187	0.315667	0.367706
263.146	0.418718	0.535048	0.475719	0.401456	0.471807	0.462058	0.8389	0.868651	0.767712	0.878092	0.940177	0.874563	0.470671	0.386268	0.559566	0.369953	0.531456		265.146	0.424579	0.381289	0.3887	0.352122	0.316018	0.283688	0.669117	0.680885	0.656675	0.679016	0.708049	0.706943	0.695252				0.377942	0.38189	0.286891	0.403454	0.341429	0.244087	0.262304	0.284397	0.292634	0.26577
265.149	0.44295	0.531806	0.502484	0.462672	0.490963	0.523727	0.892007	0.844549	0.781497	0.940571	0.969651	0.875428	0.475332	0.329789	0.549295	0.402629	0.456157
267.141	0.4864	0.516791	0.487061	0.468756	0.452684	0.516151	0.901785	0.895597	0.803087	0.930148	0.955282	0.828194	0.496273	0.394574	0.6157	0.384518	0.424131
269.144	0.516517	0.445113	0.471182	0.462815	0.420397	0.494717	0.882955	0.882055	0.788527	0.910765	0.903359	0.821859	0.48795	0.415067	0.613108	0.413678	0.40725		271.147	0.444323	0.349614	0.357891	0.299859	0.286715	0.299484	0.666453	0.687483	0.64537	0.663807	0.70919	0.727043	0.674554				0.348172	0.402059	0.298833	0.39162	0.356843	0.235318	0.273087	0.27606	0.333329	0.240394
271.147	0.502629	0.508354	0.524346	0.360958	0.424903	0.466253	0.863948	0.867953	0.78566	0.91507	0.881161	0.792974	0.471707	0.428418	0.549608	0.386724	0.468695
273.151	0.569585	0.489206	0.51844	0.470264	0.450323	0.500985	0.86923	0.870231	0.771583	0.887849	0.910659	0.782183	0.493621	0.443094	0.538462	0.415592	0.396547
275.154	0.504785	0.509474	0.492598	0.482395	0.438316	0.53647	0.875085	0.893393	0.785519	0.881832	0.87108	0.823245	0.515006	0.414665	0.559847	0.399376	0.392471		277.149	0.447628	0.352011	0.367987	0.32973	0.272654	0.283233	0.668366	0.695786	0.646519	0.69049	0.700897	0.743562	0.682197				0.352168	0.338889	0.25719	0.466848	0.310394	0.222294	0.271916	0.30771	0.34705	0.300792
277.145	0.476211	0.457176	0.527939	0.492702	0.479301	0.540482	0.907439	0.918855	0.772824	0.923615	0.902124	0.870504	0.564296	0.479412	0.543373	0.399823	0.304192
279.149	0.475961	0.559773	0.510648	0.399693	0.483076	0.482136	0.881361	0.936429	0.74732	0.921585	0.913608	0.869471	0.471675	0.435852	0.563814	0.400349	0.524247
281.152	0.502951	0.549646	0.537046	0.460934	0.464795	0.532641	0.899573	0.902041	0.780944	0.899382	0.928719	0.863889	0.447616	0.437878	0.572723	0.423733	0.43884		283.156	0.432295	0.404467	0.362341	0.32741	0.262177	0.324257	0.667924	0.699192	0.65789	0.708445	0.703114	0.725785	0.691192				0.389608	0.352371	0.317212	0.387828	0.35808	0.274414	0.225403	0.2967	0.371199	0.318514
283.156	0.506714	0.458973	0.564971	0.44588	0.503241	0.504964	0.868997	0.92402	0.755758	0.932945	0.925032	0.859312	0.501767	0.455917	0.544665	0.451261	0.336572
285.16	0.534642	0.44492	0.504307	0.49142	0.464276	0.555735	0.864229	0.895237	0.791269	0.922635	0.892689	0.837769	0.464102	0.41573	0.548449	0.401298	0.412116
287.151	0.490011	0.469007	0.514766	0.429541	0.541596	0.524328	0.868213	0.888813	0.762358	0.934039	0.857293	0.863453	0.493555	0.379859	0.545221	0.414295	0.411104		289.154	0.424549	0.396472	0.38925	0.334108	0.224616	0.362971	0.699336	0.727521	0.647207	0.71336	0.712704	0.715311	0.687981				0.390162	0.335451	0.31556	0.409656	0.37051	0.250509	0.262532	0.32013	0.3489	0.281324
289.154	0.438183	0.45801	0.488536	0.423165	0.454071	0.538354	0.866151	0.896777	0.794175	0.914638	0.882983	0.854636	0.504598	0.375874	0.575097	0.415213	0.49592
291.157	0.457388	0.470724	0.489649	0.525222	0.527279	0.471794	0.876324	0.919258	0.763895	0.917189	0.869992	0.834879	0.57177	0.373042	0.560675	0.530057	0.540808
293.161	0.444298	0.466978	0.4764	0.493515	0.486928	0.552452	0.862093	0.86498	0.789498	0.898857	0.880437	0.833712	0.53102	0.425455	0.577056	0.461154	0.425243		295.16	0.468485	0.374862	0.365215	0.346158	0.26984	0.343982	0.68992	0.709999	0.652013	0.695803	0.715819	0.741642	0.696955				0.383645	0.422026	0.343721	0.458482	0.294788	0.241298	0.263923	0.307225	0.372803	0.258415
295.164	0.46602	0.554707	0.483418	0.45779	0.434588	0.487289	0.866324	0.893219	0.768858	0.957925	0.958811	0.862918	0.536076	0.402424	0.597942	0.40585	0.47915
297.155	0.477312	0.403001	0.528638	0.532072	0.555758	0.497694	0.898495	0.920376	0.78012	0.913344	0.920242	0.850638	0.506505	0.439086	0.57024	0.324275	0.457124
299.159	0.460259	0.461977	0.500598	0.463967	0.445749	0.618758	0.915898	0.904299	0.763429	0.874503	0.915014	0.843632	0.47459	0.375613	0.578716	0.422313	0.457284		301.162	0.460545	0.369081	0.352989	0.351038	0.282186	0.33653	0.694238	0.716232	0.640269	0.722921	0.729082	0.748039	0.702501				0.40437	0.379479	0.357354	0.434341	0.300447	0.243641	0.272122	0.286937	0.324894	0.225299
301.162	0.50727	0.463609	0.571896	0.498056	0.481887	0.460766	0.925095	0.906595	0.79483	0.872406	0.918741	0.86227	0.506534	0.472937	0.526856	0.374503	0.472092
303.165	0.51242	0.575561	0.522921	0.437153	0.549509	0.577768	0.919757	0.877208	0.770215	0.934478	0.879789	0.822301	0.467034	0.498856	0.640444	0.342972	0.472975
305.156	0.421914	0.486149	0.538176	0.369546	0.516093	0.517501	0.942478	0.895111	0.792023	0.868832	0.931544	0.829958	0.530562	0.432105	0.534795	0.482345	0.380599		307.16	0.474638	0.409808	0.336235	0.35411	0.301275	0.332728	0.698742	0.720329	0.665668	0.715998	0.717784	0.773233	0.693542				0.388903	0.386812	0.349383	0.442017	0.360913	0.292855	0.25316	0.333681	0.348238	0.24768
307.16	0.429993	0.488302	0.535822	0.497443	0.484795	0.480205	0.883603	0.886061	0.791011	0.905969	0.890038	0.822909	0.562609	0.491995	0.591635	0.416715	0.450815
309.163	0.447522	0.464229	0.55414	0.487716	0.566775	0.546949	0.934391	0.912035	0.787893	0.928203	0.951505	0.836765	0.567787	0.335884	0.603263	0.436521	0.452938
311.166	0.441921	0.510373	0.493208	0.438265	0.519688	0.537929	0.869612	0.894066	0.785679	0.839047	0.938593	0.801613	0.501073	0.414371	0.607271	0.454337	0.498426		313.166	0.435066	0.457846	0.37792	0.383501	0.285278	0.339512	0.706756	0.712547	0.670049	0.696983	0.737377	0.741984	0.668135				0.396822	0.379358	0.325345	0.419443	0.366401	0.26463	0.247131	0.313942	0.355503	0.242722
313.17	0.487843	0.520525	0.563902	0.386064	0.472722	0.590349	0.882889	0.908464	0.774496	0.897294	0.938191	0.795115	0.524885	0.398705	0.615499	0.474836	0.520542
315.161	0.505551	0.51346	0.560296	0.436709	0.498188	0.622536	0.918822	0.937309	0.761413	0.872212	0.955067	0.816716	0.596856	0.393667	0.657617	0.458101	0.491546
317.164	0.514443	0.484412	0.510314	0.456277	0.523137	0.571312	0.896288	0.918158	0.796596	0.928747	0.937877	0.816964	0.549353	0.4987	0.525891	0.442784	0.475969		319.168	0.420188	0.434518	0.346529	0.331846	0.259404	0.356119	0.703005	0.718102	0.653006	0.707651	0.746019	0.760911	0.678098				0.427529	0.356581	0.31725	0.481511	0.38433	0.296614	0.27719	0.313489	0.349439	0.246535
319.169	0.482421	0.443101	0.516482	0.419083	0.447514	0.520413	0.911057	0.897337	0.79239	0.910622	0.902403	0.791361	0.577785	0.41574	0.571092	0.471387	0.486771
321.172	0.436325	0.473777	0.514705	0.458694	0.576867	0.541614	0.931932	0.908323	0.781688	0.929228	0.858798	0.84466	0.566618	0.447692	0.565817	0.445188	0.418898
323.175	0.506657	0.561234	0.577027	0.52331	0.461529	0.5318	0.901482	0.89795	0.793919	0.846854	0.956293	0.852296	0.544476	0.455198	0.587907	0.420767	0.489721		325.175	0.426588	0.398919	0.409534	0.343736	0.239005	0.334747	0.706444	0.736612	0.666325	0.716934	0.72018	0.76672	0.715615				0.431909	0.394788	0.349781	0.427652	0.399685	0.263077	0.256967	0.309686	0.304413	0.27853
325.179	0.475873	0.553847	0.495752	0.434113	0.461805	0.54776	0.880447	0.933441	0.805586	0.960686	0.881072	0.861609	0.519089	0.419657	0.557507	0.468736	0.50447
327.17	0.439846	0.409977	0.540832	0.427547	0.540167	0.560238	0.90941	0.900181	0.804397	0.932285	0.910087	0.808861	0.490681	0.430994	0.52411	0.400868	0.478966
329.173	0.42333	0.412251	0.502828	0.445415	0.476034	0.559981	0.916269	0.936414	0.784123	0.966686	0.863066	0.882243	0.528886	0.428488	0.575592	0.426235	0.343563		331.176	0.405495	0.415122	0.426656	0.378204	0.270149	0.361175	0.726998	0.732462	0.671765	0.723631	0.742247	0.765313	0.70545				0.377946	0.394185	0.335581	0.399717	0.412829	0.288196	0.274341	0.305317	0.349284	0.237186
331.176	0.508555	0.492331	0.533531	0.524396	0.527135	0.514974	0.899962	0.906348	0.796588	0.914648	0.913726	0.837693	0.513524	0.425937	0.587837	0.442444	0.505742
333.18	0.490509	0.534099	0.537161	0.494374	0.489468	0.526929	0.832885	0.898609	0.770953	0.985475	0.911156	0.822214	0.574286	0.471641	0.592654	0.46607	0.488544
335.183	0.524443	0.503548	0.538638	0.567101	0.520658	0.657771	0.929483	0.86912	0.812499	0.958351	0.868146	0.851042	0.552156	0.444492	0.518886	0.427686	0.424356		337.178	0.384964	0.404838	0.418358	0.340457	0.29424	0.362461	0.70441	0.716806	0.649533	0.705023	0.747709	0.780776	0.685844				0.401664	0.40869	0.294001	0.422879	0.355196	0.269252	0.28917	0.310393	0.336174	0.290938
337.174	0.523605	0.562929	0.556796	0.402577	0.501826	0.573494	0.862605	0.887604	0.801876	0.910236	0.879164	0.860676	0.551604	0.427678	0.599029	0.418415	0.477218
339.178	0.513551	0.506696	0.493671	0.503838	0.493439	0.483508	0.87749	0.941346	0.816954	0.889528	0.924883	0.875307	0.60807	0.419034	0.658042	0.424771	0.502885
341.181	0.437085	0.518841	0.488616	0.503402	0.526445	0.52377	0.931015	0.847493	0.788095	0.931083	0.965401	0.848871	0.526682	0.362248	0.608232	0.421168	0.463678		343.184	0.383389	0.420142	0.4243	0.375221	0.314006	0.338742	0.717667	0.742411	0.661983	0.705811	0.716982	0.786846	0.718328				0.390809	0.441708	0.319049	0.479659	0.410253	0.272433	0.299077	0.274572	0.307166	0.276319
343.184	0.461282	0.45556	0.502411	0.534192	0.464318	0.559306	0.883351	0.889577	0.813701	0.956206	0.914591	0.866366	0.552705	0.427588	0.571486	0.444506	0.509597
345.187	0.501623	0.541382	0.437784	0.549723	0.479477	0.48819	0.868976	0.91004	0.824941	0.92935	0.914673	0.834324	0.560512	0.41238	0.593162	0.418392	0.522131
347.179	0.554113	0.463112	0.544346	0.529411	0.503857	0.551161	0.869869	0.903222	0.797818	0.935168	0.844902	0.880856	0.5793	0.367567	0.586427	0.553306	0.488777		349.182	0.415286	0.403995	0.425956	0.36026	0.287183	0.335801	0.727967	0.732708	0.669822	0.725006	0.734227	0.799129	0.720493				0.425713	0.397328	0.314736	0.528296	0.372656	0.291561	0.300247	0.289448	0.343493	0.265412
349.182	0.520711	0.54702	0.450247	0.503	0.506173	0.584857	0.896654	0.89681	0.782884	0.929922	0.907025	0.82277	0.494362	0.448045	0.57651	0.542574	0.535215
351.187	0.551957	0.554667	0.503266	0.474151	0.56423	0.567545	0.891709	0.896157	0.771097	0.955023	0.885143	0.862183	0.549411	0.494461	0.653245	0.416924	0.543891
353.19	0.5037	0.51781	0.491776	0.462187	0.549457	0.593937	0.885828	0.906404	0.807814	0.967129	0.864482	0.869634	0.522788	0.45563	0.649671	0.49001	0.458247		355.189	0.429221	0.436518	0.372676	0.395076	0.31204	0.324925	0.750765	0.707322	0.67018	0.728052	0.748367	0.76611	0.733973				0.415233	0.429073	0.3263	0.478025	0.3887	0.281628	0.308682	0.316187	0.37094	0.280229
355.193	0.520725	0.510497	0.544368	0.585863	0.458235	0.597801	0.90107	0.95565	0.787011	0.903135	0.910872	0.893101	0.544342	0.435593	0.616227	0.473805	0.486123
357.184	0.514102	0.619294	0.573245	0.555708	0.542531	0.512047	0.910421	0.960791	0.825068	0.963404	0.912302	0.865085	0.588101	0.47399	0.628061	0.421248	0.506747
359.188	0.508206	0.557818	0.523981	0.516096	0.511998	0.458858	0.909612	0.898925	0.800789	0.969319	0.881032	0.886066	0.581083	0.392354	0.632505	0.477751	0.503758		361.191	0.459403	0.471315	0.406062	0.360561	0.258394	0.352617	0.742657	0.713169	0.659727	0.719531	0.750717	0.787117	0.736228				0.408616	0.418259	0.361553	0.468185	0.381532	0.285081	0.31109	0.30261	0.369967	0.265103
361.191	0.541621	0.489049	0.50409	0.530018	0.510403	0.493102	0.917629	0.932525	0.787555	0.900594	0.935511	0.886388	0.522824	0.483144	0.513397	0.432409	0.50968
363.194	0.518217	0.483698	0.56963	0.466543	0.567099	0.505142	0.912534	0.921143	0.79162	0.894509	0.897881	0.927162	0.522672	0.343244	0.586635	0.397535	0.503873
365.197	0.512736	0.588146	0.592717	0.471961	0.564666	0.493	0.890579	0.899658	0.798101	0.972208	0.878681	0.912134	0.509586	0.427779	0.578678	0.419046	0.429307		367.193	0.430026	0.435947	0.369081	0.409844	0.301109	0.380274	0.739003	0.747396	0.653961	0.730719	0.717885	0.802472	0.736074				0.425927	0.432115	0.328184	0.489761	0.417193	0.313481	0.292857	0.302539	0.354207	0.32418
367.189	0.535741	0.494995	0.574011	0.502574	0.505741	0.49497	0.852309	0.844786	0.807176	0.942667	0.872801	0.913868	0.537211	0.445606	0.574402	0.466392	0.535816
369.192	0.534888	0.539653	0.562827	0.480645	0.439492	0.528792	0.854775	0.932069	0.812413	0.961595	0.922811	0.895198	0.535825	0.513323	0.642494	0.397348	0.477089
371.195	0.532255	0.600514	0.565373	0.530091	0.507176	0.585852	0.919145	0.905659	0.808721	0.937739	0.99819	0.92032	0.577529	0.459822	0.62234	0.422566	0.419853		375.197	0.409225	0.44864	0.417214	0.388542	0.357062	0.35134	0.736071	0.744791	0.658183	0.737363	0.731396	0.785662	0.738565				0.458964	0.451427	0.359412	0.466332	0.446383	0.303497	0.309944	0.302785	0.363648	0.2667
373.199	0.511953	0.496558	0.607617	0.639191	0.550021	0.523109	0.92713	0.921754	0.813432	0.925331	0.916658	0.883489	0.553692	0.454093	0.609142	0.528314	0.558713
375.202	0.513719	0.548805	0.585492	0.612516	0.434927	0.572572	0.868719	0.917478	0.820301	0.961517	0.980189	0.864362	0.580255	0.432565	0.642292	0.471064	0.528352
377.193	0.472109	0.549036	0.619229	0.481918	0.476813	0.48409	0.90198	0.909124	0.841027	0.930732	0.939352	0.893278	0.593155	0.493438	0.654381	0.471332	0.49985
379.197	0.530772	0.502646	0.497096	0.557378	0.488123	0.540661	0.878081	0.873387	0.827604	0.977473	0.958102	0.899332	0.570698	0.476056	0.594655	0.474452	0.505002
381.2	0.483504	0.612008	0.593621	0.492893	0.525276	0.49445	0.896834	0.943444	0.823335	0.91986	0.91503	0.895737	0.626174	0.442639	0.603747	0.496545	0.468704		385.205	0.442978	0.428647	0.406311	0.411995	0.358363	0.329091	0.739446	0.74147	0.660011	0.770689	0.719997	0.809436	0.75743				0.481716	0.421351	0.361605	0.490013	0.427632	0.276808	0.329042	0.286299	0.41812	0.310605
383.203	0.454044	0.549054	0.622355	0.435665	0.567321	0.558007	0.90623	0.90593	0.811936	0.927672	0.887906	0.915793	0.605277	0.372002	0.614184	0.418866	0.369534
385.208	0.568086	0.560752	0.613211	0.511802	0.570837	0.451324	0.904389	0.905781	0.825484	0.904223	0.94597	0.901675	0.590032	0.4342	0.632447	0.469529	0.538042
387.211	0.499114	0.511689	0.589291	0.508237	0.454682	0.54416	0.924016	0.919835	0.787177	0.954113	0.953388	0.886784	0.572588	0.426652	0.585287	0.460565	0.498629
389.202	0.530488	0.569702	0.557848	0.499912	0.518667	0.547101	0.88683	0.901464	0.801361	0.961516	0.91107	0.899787	0.561061	0.446158	0.525567	0.50682	0.418537
391.205	0.537356	0.500685	0.657583	0.478575	0.572937	0.527087	0.886823	0.899118	0.813288	0.921669	0.940572	0.911644	0.632913	0.530088	0.614283	0.472512	0.445226		395.207	0.431682	0.417136	0.40133	0.400814	0.329246	0.375857	0.730942	0.737347	0.661168	0.758714	0.747844	0.798748	0.722993				0.448708	0.442745	0.384797	0.500691	0.438599	0.284208	0.340282	0.295853	0.4365	0.27683
393.209	0.581697	0.577608	0.680126	0.595602	0.541617	0.588396	0.908154	0.875092	0.795337	0.927404	0.914031	0.919212	0.573011	0.468793	0.602117	0.489154	0.484973
395.212	0.564091	0.592298	0.612801	0.566064	0.544352	0.52424	0.869081	0.905224	0.846345	0.927156	0.924421	0.911209	0.531995	0.447281	0.641162	0.391331	0.429273
397.203	0.4882	0.612664	0.525913	0.577488	0.498009	0.524249	0.862555	0.880514	0.80805	0.930654	0.986901	0.891676	0.574699	0.390059	0.631703	0.476456	0.498498
399.207	0.541567	0.535695	0.530891	0.570898	0.516818	0.477451	0.888374	0.889211	0.82777	0.976827	0.947635	0.921697	0.581131	0.447656	0.660939	0.4708	0.559847
401.21	0.623757	0.567238	0.554632	0.531824	0.487289	0.527394	0.948352	0.899388	0.821627	0.955048	0.926657	0.92175	0.577101	0.432656	0.620459	0.480753	0.580429		405.209	0.454312	0.416611	0.410235	0.391597	0.337458	0.386272	0.748751	0.745103	0.695685	0.764737	0.77072	0.797006	0.739755				0.474494	0.406262	0.342929	0.482689	0.420188	0.294424	0.355122	0.3411	0.416403	0.279372
403.213	0.566663	0.52187	0.677704	0.588133	0.616167	0.550184	0.907296	0.904459	0.79165	0.984484	0.94333	0.866622	0.585428	0.49366	0.564921	0.423007	0.554343
405.204	0.46905	0.487924	0.591994	0.510438	0.5605	0.582173	0.899021	0.90948	0.828216	0.991993	0.954945	0.956041	0.669296	0.458294	0.550682	0.482192	0.662754
407.208	0.500836	0.518142	0.636526	0.62473	0.541113	0.530339	0.876371	0.890895	0.82706	0.9917	0.956338	0.884392	0.64512	0.428521	0.636377	0.481921	0.540081
409.211	0.528464	0.544447	0.609277	0.628781	0.53695	0.541175	0.877637	0.899515	0.832828	0.913679	1.04403	0.888234	0.592785	0.420363	0.644429	0.476831	0.567052
411.214	0.514178	0.552227	0.571691	0.464897	0.611765	0.483183	0.895793	0.91049	0.811009	1.00975	0.96699	0.89859	0.650597	0.47315	0.619036	0.401989	0.47319		415.214	0.464944	0.464903	0.443449	0.403609	0.342418	0.388711	0.76006	0.772735	0.706912	0.77248	0.753091	0.783827	0.749757				0.487233	0.418581	0.327005	0.5207	0.434576	0.322432	0.33154	0.340695	0.431976	0.287136
413.218	0.592442	0.546799	0.591618	0.526345	0.584098	0.612318	0.916855	0.896889	0.820404	0.988347	0.928621	0.911794	0.568301	0.469202	0.641193	0.438015	0.603162
415.209	0.508631	0.592928	0.65698	0.582549	0.59776	0.660102	0.944379	0.893627	0.812724	0.954272	0.980887	0.936316	0.662501	0.458581	0.67023	0.455153	0.551312
417.212	0.519306	0.55245	0.619205	0.467563	0.620309	0.596208	0.889791	0.903387	0.840034	1.00519	0.88749	0.948558	0.562081	0.510187	0.700746	0.492563	0.560923
419.216	0.496656	0.560391	0.603871	0.580403	0.605562	0.627063	0.887623	0.957803	0.820992	0.882828	0.994693	0.946319	0.534756	0.483911	0.643768	0.54748	0.57733
421.22	0.557201	0.561642	0.565107	0.465054	0.5044	0.520921	0.895905	0.874877	0.83436	0.929346	1.0169	0.922016	0.581862	0.457213	0.629359	0.587697	0.510224		425.219	0.430229	0.469558	0.426987	0.385861	0.31011	0.385373	0.758138	0.770852	0.694253	0.76389	0.744634	0.80635	0.745667				0.489728	0.423798	0.375787	0.502375	0.402327	0.300994	0.330448	0.353615	0.407905	0.252134
423.223	0.535979	0.620528	0.559969	0.525625	0.589426	0.551415	0.904827	0.897171	0.81061	0.873311	0.926804	0.904296	0.599253	0.48729	0.732088	0.537378	0.529535
425.214	0.504091	0.621418	0.552887	0.561744	0.551967	0.56918	0.898163	0.920149	0.81874	0.910239	0.985975	0.93395	0.57636	0.478735	0.688662	0.566772	0.458222
427.218	0.56463	0.607636	0.630674	0.493658	0.640777	0.590827	0.952026	0.944805	0.834444	0.929244	0.992857	0.87782	0.638788	0.466979	0.644225	0.489525	0.595
429.221	0.527046	0.66138	0.627807	0.503735	0.567039	0.590897	0.926253	0.891674	0.833704	0.971581	0.961762	0.929473	0.576729	0.430779	0.638938	0.552078	0.464101
431.224	0.529896	0.6109	0.551566	0.634293	0.539988	0.584641	0.921032	0.937679	0.856569	0.933928	0.954592	0.902964	0.591174	0.540636	0.62105	0.381616	0.555427		435.224	0.421298	0.481395	0.445911	0.382672	0.338266	0.386129	0.768684	0.772	0.697152	0.772359	0.769148	0.782794	0.756455				0.507465	0.43363	0.371614	0.481531	0.400434	0.277473	0.319299	0.363561	0.405684	0.263282
433.228	0.557556	0.558507	0.629548	0.612578	0.568165	0.61363	0.928939	0.930511	0.837138	0.915736	0.979802	0.918284	0.626875	0.48626	0.618681	0.569331	0.557721
435.219	0.468873	0.579639	0.635187	0.496378	0.584612	0.553618	0.940052	0.9112	0.850096	0.926293	0.978778	0.959778	0.620354	0.477878	0.585214	0.436393	0.452374
437.222	0.628522	0.636584	0.629838	0.442676	0.566965	0.622138	0.889982	0.876323	0.826223	0.985764	0.964205	0.927031	0.583739	0.433768	0.67718	0.442541	0.548304
439.226	0.519404	0.614438	0.53698	0.517306	0.607811	0.602858	0.937473	0.912902	0.861526	0.991332	0.918543	0.913826	0.607028	0.450987	0.639154	0.471028	0.516633
441.229	0.536344	0.578789	0.653061	0.581574	0.568575	0.618261	0.9308	0.869447	0.862636	0.957895	0.95182	0.935929	0.619027	0.511234	0.604788	0.516337	0.609686		445.228	0.451118	0.431721	0.424036	0.415623	0.372186	0.397928	0.782076	0.777693	0.69828	0.764948	0.774607	0.811886	0.748339				0.463463	0.428524	0.372833	0.509569	0.386415	0.295259	0.345078	0.360595	0.449157	0.313026
443.232	0.643805	0.54099	0.565214	0.562929	0.555678	0.56668	0.941214	0.894779	0.814208	0.909288	0.982881	0.916563	0.56556	0.496548	0.615103	0.42041	0.502657
445.223	0.59997	0.544644	0.594538	0.678158	0.546606	0.635791	0.902664	0.911392	0.81437	0.998922	1.02266	0.882992	0.638631	0.484899	0.695142	0.531622	0.516356
447.227	0.560463	0.536376	0.550025	0.575833	0.601103	0.670575	0.88923	0.882636	0.812545	0.983587	0.946316	0.920021	0.594073	0.471743	0.594541	0.498916	0.572376
449.23	0.52282	0.53703	0.573084	0.467897	0.647529	0.638456	0.8975	0.890126	0.880674	0.98741	0.954663	0.899346	0.648565	0.431878	0.677982	0.516584	0.591337
451.233	0.624945	0.584202	0.658119	0.533277	0.552549	0.602898	0.922113	0.949413	0.848649	0.992707	1.00151	0.915068	0.66801	0.518678	0.665386	0.504394	0.560473		455.233	0.418506	0.445743	0.477602	0.40882	0.367743	0.367818	0.784654	0.772007	0.711763	0.750754	0.774183	0.811726	0.754759				0.511967	0.432263	0.397146	0.485378	0.417879	0.284933	0.326475	0.369866	0.448557	0.299953
453.238	0.611711	0.60359	0.633639	0.44913	0.568298	0.575039	0.937494	0.873263	0.813333	0.961661	0.999468	0.932556	0.62896	0.438989	0.693795	0.511454	0.455789
455.228	0.557056	0.644	0.632512	0.475484	0.641707	0.578953	0.922497	0.916724	0.828985	0.929297	1.02414	0.889811	0.611623	0.439497	0.653555	0.43866	0.573322
457.232	0.575044	0.662838	0.547414	0.534204	0.597673	0.561791	0.925274	0.894726	0.849895	0.993609	0.967912	0.922785	0.556333	0.528412	0.623538	0.514476	0.529429
459.236	0.566649	0.566614	0.592693	0.604696	0.575456	0.677934	0.936633	0.875731	0.83791	0.941748	0.999932	0.908755	0.615166	0.473906	0.628802	0.463481	0.608481
461.239	0.563788	0.673178	0.590608	0.515919	0.647735	0.658292	0.884558	0.93912	0.850957	1.04434	1.00746	0.933376	0.594242	0.415386	0.675086	0.49832	0.572685		465.241	0.411509	0.465949	0.444566	0.398882	0.310576	0.403412	0.793312	0.758606	0.723967	0.744355	0.761504	0.825972	0.748783				0.485386	0.444882	0.416076	0.482496	0.460195	0.289549	0.336178	0.398444	0.439548	0.277088
463.242	0.582899	0.536837	0.562173	0.526181	0.540937	0.580757	0.887957	0.894277	0.866936	1.00663	0.949446	0.910032	0.542189	0.495879	0.710987	0.463163	0.50665
465.246	0.642588	0.602356	0.634021	0.49553	0.591853	0.567151	0.877129	0.914924	0.813698	1.01255	0.93363	0.948739	0.613585	0.404038	0.739528	0.505994	0.489625
467.237	0.662769	0.513179	0.60454	0.562641	0.599722	0.588154	0.908018	0.933838	0.820145	0.927935	0.966861	0.939039	0.607735	0.528593	0.614905	0.523451	0.575118
469.24	0.520737	0.602369	0.61718	0.543939	0.555361	0.594183	0.918937	0.927881	0.84384	0.986863	0.995395	0.937406	0.590038	0.519112	0.640277	0.573953	0.532228
471.243	0.532274	0.575175	0.596942	0.500719	0.498589	0.573615	0.927235	0.954274	0.841895	0.951103	0.935989	0.945538	0.549331	0.540661	0.667897	0.552245	0.538966		475.243	0.436628	0.436334	0.442067	0.424345	0.330704	0.405868	0.787028	0.779546	0.740204	0.7705	0.776005	0.833403	0.76971				0.494112	0.412408	0.380909	0.522284	0.456553	0.298434	0.372179	0.380483	0.439223	0.253909
473.247	0.544604	0.597581	0.67016	0.527502	0.564883	0.677231	0.918076	0.934908	0.861019	1.02793	0.959506	0.978689	0.561833	0.425427	0.649216	0.454719	0.479972
475.238	0.567389	0.570412	0.647067	0.594863	0.520555	0.551405	0.901975	0.881984	0.838911	0.974334	0.996698	0.925768	0.58106	0.470088	0.707585	0.555298	0.382013
477.242	0.554565	0.556846	0.543768	0.462388	0.555445	0.674543	0.934769	0.899526	0.836484	1.01927	0.972442	0.966277	0.608181	0.484982	0.63678	0.516329	0.577183
479.245	0.559682	0.572558	0.598351	0.566936	0.617015	0.6439	0.982987	0.959219	0.826632	0.981237	0.961148	0.926176	0.561889	0.455325	0.730153	0.533377	0.528042
481.248	0.525657	0.645486	0.60106	0.556118	0.646785	0.639581	0.897332	0.898489	0.841745	1.02066	0.947677	0.950839	0.545838	0.497824	0.668119	0.556396	0.511266		485.248	0.374129	0.461262	0.456868	0.419239	0.350453	0.417266	0.797495	0.771816	0.740097	0.774172	0.776609	0.826142	0.782644				0.502228	0.453111	0.399497	0.541806	0.410211	0.291402	0.374036	0.382443	0.421695	0.307414
483.252	0.588799	0.628885	0.615112	0.620781	0.584249	0.608044	0.951928	0.939584	0.828605	0.907103	0.959715	0.926311	0.56812	0.523587	0.635521	0.518874	0.57912
485.243	0.549813	0.649431	0.68402	0.611368	0.55487	0.610056	0.941602	0.920943	0.85503	0.882629	0.988595	0.927464	0.604519	0.508403	0.583115	0.515341	0.559883
487.246	0.616833	0.557524	0.622543	0.541293	0.621148	0.585121	0.993269	0.924239	0.867418	0.939751	0.997468	0.94755	0.581684	0.465358	0.533254	0.525035	0.452992
489.25	0.567102	0.593198	0.488287	0.564663	0.58774	0.604966	0.953044	0.902973	0.872215	0.996458	0.957491	0.904636	0.559696	0.478896	0.703093	0.518694	0.549775
491.253	0.53389	0.577137	0.551505	0.572426	0.596394	0.615377	0.971186	0.905878	0.855659	0.942141	0.914516	0.94116	0.600426	0.563067	0.717118	0.507998	0.509783		495.252	0.395493	0.457832	0.413112	0.44066	0.368581	0.434061	0.793316	0.778907	0.742517	0.785247	0.763358	0.802345	0.781668				0.511598	0.437445	0.40332	0.505592	0.38842	0.270583	0.393429	0.393266	0.417843	0.304174
493.256	0.533841	0.574619	0.532487	0.575348	0.553061	0.686056	0.92718	0.894052	0.827556	1.00735	1.02401	0.9815	0.608159	0.535186	0.695791	0.623137	0.523826
495.248	0.554459	0.607412	0.618119	0.593238	0.556948	0.669817	0.929746	0.916673	0.881157	0.983177	0.913082	0.952631	0.567384	0.518347	0.597285	0.476998	0.591282
497.251	0.605651	0.630165	0.651193	0.656771	0.63557	0.617559	0.979664	0.902927	0.857944	0.977707	0.978339	0.94626	0.536938	0.45334	0.621456	0.522622	0.492171
499.254	0.517346	0.575114	0.655369	0.596264	0.578023	0.63729	0.919124	0.952375	0.875879	1.02059	0.887351	0.956489	0.556304	0.506885	0.684309	0.602732	0.465272
501.257	0.652736	0.668573	0.619981	0.49275	0.555993	0.739515	0.966235	0.910042	0.87356	0.986625	0.93831	0.952777	0.553587	0.526304	0.687858	0.621121	0.584997		505.257	0.461707	0.459183	0.476762	0.439138	0.412817	0.421793	0.799236	0.778565	0.728216	0.78121	0.79426	0.839137	0.77767				0.534857	0.457341	0.37827	0.533504	0.464748	0.312047	0.357261	0.38196	0.396996	0.298515
503.262	0.620254	0.602321	0.615062	0.560182	0.640765	0.612203	0.911068	0.922425	0.839841	1.0112	0.92668	0.950478	0.574031	0.515136	0.677936	0.505735	0.458867
505.252	0.757634	0.564086	0.63575	0.531972	0.632897	0.542153	0.92897	0.933982	0.870981	0.979469	0.901339	0.961783	0.634012	0.519309	0.654813	0.557371	0.485323
507.256	0.561378	0.564826	0.551577	0.662605	0.551737	0.599091	0.954663	0.867574	0.854001	1.00428	0.926366	0.969719	0.599256	0.498748	0.64778	0.517746	0.591957
509.26	0.53594	0.631374	0.62093	0.664293	0.725583	0.672411	0.941017	0.909631	0.887722	0.989599	0.972812	0.938913	0.646259	0.48127	0.675147	0.508342	0.545315
511.263	0.62837	0.539812	0.605107	0.613916	0.61707	0.540218	0.973098	0.90234	0.855225	0.98634	0.987217	0.92266	0.587358	0.545883	0.683697	0.520768	0.532525		515.265	0.439199	0.448753	0.439414	0.425	0.358013	0.465505	0.820445	0.789652	0.740109	0.778264	0.792073	0.843956	0.778198				0.490712	0.473033	0.40026	0.535536	0.504105	0.29265	0.37469	0.37394	0.421739	0.278853
513.266	0.562938	0.601723	0.659039	0.677577	0.639742	0.719173	0.969486	0.902279	0.873289	1.00646	1.00178	0.96445	0.622888	0.501755	0.605076	0.538204	0.605583
515.27	0.601906	0.631481	0.603769	0.649935	0.654761	0.598066	0.988004	0.892234	0.860672	0.960766	1.01873	0.941342	0.576757	0.435567	0.756021	0.507184	0.465795
517.261	0.668102	0.621327	0.702793	0.595405	0.715407	0.643491	0.94929	0.895658	0.836932	1.004	1.02452	0.917577	0.6172	0.485665	0.768367	0.591581	0.53883
519.264	0.5754	0.580822	0.680775	0.628821	0.615037	0.625607	0.944017	0.912212	0.828783	0.999205	1.0172	0.91297	0.610014	0.491804	0.669627	0.533981	0.57448
521.268	0.601816	0.528396	0.665193	0.483878	0.653145	0.664108	0.954453	0.916837	0.874557	1.06555	1.02813	0.921782	0.661176	0.4397	0.6285	0.577187	0.548273		525.264	0.437906	0.465716	0.474016	0.421965	0.397866	0.461174	0.827288	0.8117	0.730292	0.786626	0.804081	0.825186	0.772891				0.450309	0.48742	0.411385	0.518403	0.44216	0.305008	0.356517	0.373352	0.388718	0.311303
523.259	0.607488	0.6442	0.632777	0.596606	0.615755	0.727924	0.982005	0.910874	0.828559	1.04621	0.939556	0.960291	0.616472	0.463127	0.734087	0.567973	0.538445
525.262	0.550121	0.605216	0.688214	0.518547	0.630511	0.605639	0.94764	0.948648	0.872195	0.936306	0.985907	0.932955	0.596098	0.461806	0.733361	0.684861	0.558403
527.265	0.602639	0.673429	0.620611	0.662056	0.62331	0.600037	0.963248	0.871289	0.872425	1.00136	1.00481	0.936774	0.62534	0.488627	0.705904	0.62604	0.571233
529.269	0.609333	0.628842	0.655375	0.635109	0.706373	0.68572	0.935883	0.89833	0.878251	1.03925	1.07295	0.948489	0.638753	0.449806	0.676082	0.549723	0.533763
531.272	0.546006	0.692132	0.686681	0.678473	0.680648	0.662764	0.926683	0.906603	0.880353	0.950354	1.00823	0.945113	0.622678	0.539553	0.713665	0.586268	0.569278		535.274	0.462633	0.476126	0.426818	0.425811	0.358778	0.433622	0.817221	0.76862	0.716395	0.803483	0.752775	0.821397	0.774327				0.500437	0.465698	0.362867	0.526828	0.423111	0.302229	0.342698	0.400497	0.408985	0.31643
533.275	0.593817	0.692734	0.7022	0.628827	0.630252	0.624842	0.987965	0.933349	0.872414	0.995782	0.995358	1.00357	0.573429	0.449328	0.661408	0.557203	0.623731
535.279	0.602019	0.603564	0.601894	0.622262	0.599918	0.661927	0.969596	0.885454	0.877558	0.958035	1.00254	0.936262	0.589266	0.460733	0.726562	0.611202	0.480162
537.27	0.600001	0.604903	0.613567	0.619759	0.651973	0.580016	0.973806	0.929434	0.8402	0.931003	1.01902	0.931544	0.59738	0.482563	0.667325	0.561294	0.475461
539.274	0.518772	0.613445	0.638775	0.556136	0.645003	0.681416	1.00266	0.922332	0.870841	1.04582	0.969839	1.00456	0.63123	0.493759	0.67935	0.536247	0.566542
541.278	0.644141	0.59699	0.6647	0.576598	0.673137	0.636753	0.95174	0.895434	0.856995	0.985998	1.00798	0.946443	0.587338	0.544542	0.686164	0.557234	0.578387		545.277	0.46987	0.44262	0.397875	0.43248	0.282133	0.46919	0.805705	0.802203	0.704306	0.793553	0.785873	0.847964	0.763154				0.481703	0.499455	0.408393	0.495073	0.438722	0.334975	0.350127	0.377793	0.402674	0.292208
543.281	0.570938	0.677216	0.65208	0.67265	0.751899	0.616955	0.970034	0.874668	0.895215	0.928215	1.02043	1.0029	0.581969	0.497517	0.667857	0.436275	0.51864
545.272	0.613347	0.618135	0.652988	0.633603	0.643103	0.681601	0.939153	0.949298	0.878013	0.942244	1.02795	0.963726	0.658458	0.472486	0.768987	0.477675	0.597145
547.275	0.598716	0.662586	0.684851	0.636259	0.680815	0.664629	1.0105	0.902485	0.889722	0.986625	0.993695	0.917593	0.60889	0.497571	0.628381	0.563051	0.61708
549.279	0.578362	0.65085	0.69355	0.595175	0.703883	0.633127	0.98604	0.914252	0.895385	0.966363	1.05445	1.0205	0.605399	0.53055	0.780861	0.550839	0.579778
551.282	0.629521	0.618442	0.693166	0.609149	0.788785	0.602288	0.963255	0.917254	0.887744	0.983998	0.979008	0.925522	0.609059	0.453866	0.664894	0.528413	0.5159		555.284	0.534821	0.469476	0.423373	0.413464	0.325817	0.423405	0.80622	0.780526	0.726326	0.780467	0.787714	0.850921	0.786818				0.52712	0.445459	0.385396	0.533382	0.452768	0.310852	0.371244	0.370455	0.456059	0.328516
553.285	0.583092	0.625528	0.67429	0.650327	0.705948	0.649103	0.959537	0.873127	0.898036	1.00639	1.0069	0.904593	0.61484	0.521291	0.748231	0.511827	0.527536
555.289	0.559702	0.622805	0.698097	0.639837	0.618777	0.690099	0.95339	0.958909	0.894519	0.950715	0.977521	0.97419	0.595996	0.452485	0.623004	0.593871	0.589647
557.28	0.572624	0.547821	0.646698	0.628696	0.651706	0.554455	0.998431	0.885599	0.914341	0.921468	0.89829	0.967413	0.626439	0.485529	0.770968	0.562633	0.601389
559.283	0.575034	0.582233	0.762631	0.592908	0.746013	0.646726	0.950545	0.930416	0.887089	0.953989	0.986349	0.959194	0.609705	0.600444	0.755876	0.553422	0.515003
561.286	0.544473	0.518347	0.689995	0.655197	0.67988	0.627776	0.948315	0.969589	0.887644	0.991976	0.964322	0.950935	0.696248	0.555164	0.763384	0.592316	0.510758		565.286	0.476331	0.466514	0.421145	0.414478	0.3651	0.435034	0.837147	0.778715	0.742945	0.809334	0.772909	0.841959	0.814547				0.517965	0.465956	0.381125	0.54183	0.4223	0.316672	0.370051	0.406541	0.410428	0.28382
563.29	0.599466	0.682419	0.729866	0.593481	0.6376	0.69822	1.01434	0.911095	0.916972	0.963785	0.958753	0.948433	0.561812	0.483445	0.657533	0.629669	0.623616
565.281	0.527407	0.673324	0.666286	0.65023	0.637675	0.69137	1.02366	0.919559	0.863884	0.988246	0.960731	0.966223	0.56288	0.556082	0.716878	0.542428	0.566969
567.284	0.616914	0.599031	0.730554	0.556908	0.60484	0.659873	0.986161	0.957586	0.911027	0.965022	0.9805	0.897539	0.638341	0.474657	0.714043	0.579768	0.528023
569.288	0.550959	0.576126	0.668572	0.54597	0.663941	0.746267	0.999484	0.931161	0.891797	0.96927	0.962305	0.952159	0.600515	0.48553	0.696758	0.43315	0.555099
571.291	0.655544	0.59731	0.715998	0.699593	0.64113	0.683814	1.0402	0.928468	0.886448	0.954492	1.00309	0.917206	0.630821	0.425805	0.761943	0.662672	0.597316		575.294	0.477502	0.461005	0.42609	0.443231	0.3259	0.405264	0.845189	0.798949	0.734087	0.807775	0.777799	0.815001	0.80204				0.500107	0.487848	0.382046	0.576715	0.385786	0.287136	0.372266	0.409636	0.42388	0.275653
573.295	0.517106	0.615229	0.665251	0.682471	0.696529	0.712794	0.971067	0.924215	0.830282	1.00264	0.99244	0.972952	0.541013	0.459014	0.748749	0.626813	0.568963
575.299	0.551922	0.670014	0.722039	0.550555	0.645622	0.685527	0.964645	0.947845	0.906092	0.963241	0.986461	0.938076	0.639922	0.481918	0.758932	0.591578	0.552882
577.29	0.559553	0.659315	0.650579	0.663557	0.625199	0.676032	0.964996	0.881712	0.870588	0.916942	0.947684	0.914361	0.579658	0.476964	0.729594	0.618282	0.56914
579.293	0.572755	0.638883	0.773779	0.696782	0.697534	0.678333	0.999933	0.945417	0.865611	0.988636	1.02216	0.951338	0.632849	0.445571	0.704004	0.522142	0.503601
581.297	0.670745	0.6025	0.64772	0.574351	0.72406	0.687947	0.987097	0.902217	0.940291	0.96612	0.989287	0.914415	0.635211	0.472104	0.722327	0.565284	0.467786		585.293	0.474783	0.457769	0.451965	0.440666	0.343241	0.432211	0.840881	0.787494	0.720966	0.82251	0.770526	0.843418	0.821539				0.540795	0.44809	0.411255	0.568331	0.435957	0.320617	0.357775	0.404717	0.424911	0.299132
583.288	0.663418	0.673034	0.676001	0.617212	0.713396	0.663181	0.971143	0.906249	0.916319	1.03265	0.998274	0.911264	0.558257	0.492572	0.798033	0.464426	0.462861
585.291	0.616785	0.611628	0.701022	0.658235	0.725125	0.71514	0.981649	0.930218	0.918194	0.972728	1.0619	0.911528	0.646173	0.497596	0.744821	0.546508	0.553871
587.294	0.644827	0.648744	0.796507	0.632771	0.714776	0.704614	0.965102	0.914319	0.888944	0.945244	1.05483	0.936572	0.65303	0.529667	0.812298	0.580964	0.49837
589.298	0.601411	0.661494	0.771766	0.609482	0.644469	0.570484	0.994728	0.941735	0.878782	1.03767	0.981355	0.900954	0.647938	0.48222	0.685982	0.565922	0.583801
591.301	0.599802	0.732006	0.705312	0.63039	0.580381	0.614121	0.984055	0.943801	0.885059	0.966771	0.966383	0.966257	0.609418	0.492646	0.761969	0.537783	0.540049		594.297	0.520785	0.478845	0.464338	0.469708	0.360363	0.435143	0.852474	0.776343	0.762799	0.79498	0.777785	0.840291	0.838613				0.4985	0.477872	0.381425	0.523627	0.495596	0.307384	0.398002	0.43941	0.47846	0.323436
593.292	0.659919	0.680333	0.697302	0.598659	0.663072	0.655795	0.996797	0.896465	0.876475	0.996107	0.975208	0.966844	0.587262	0.517426	0.73669	0.5131	0.55499
595.295	0.638919	0.613029	0.683721	0.598696	0.710406	0.703191	1.02088	0.931577	0.889087	0.987128	1.07461	0.941556	0.656087	0.524672	0.783719	0.551531	0.582521
597.299	0.596556	0.680768	0.718705	0.609486	0.739183	0.676136	0.99904	0.936678	0.897039	0.967837	0.994366	0.933234	0.628484	0.502413	0.711904	0.582924	0.570067
