# Supplementary material for: ESCO1 and CTCF enable formation of long chromatin loops by protecting cohesinSTAG1 from WAPL
Source: eLife journal article supplement (doi:10.7554/elife.52091), 2020-02-17
Supplement: supp [file elife_poa_e52091_Figure_2_source_data_1.xlsx]

## Sheet: Sheet1
time (min)	CONTROL RNAi															WAPL RNAi																							STAG1 RNAi
0	1	1	1	1	1	1	1	1	1	1	1	1	1	1	1	1	1	1	1	1	1	1	1	1	1	1	1	1	1	1	1	1	1	1	1	1	1	1	1	1	1	1	1	1	1	1	1	1	1
0.02	0.997916	0.997868	0.998452	0.996591	0.998287	0.997973	0.998313	0.997713	0.998385	0.998293	0.998592	0.99759	0.997674	0.99769	0.997051	0.999553	0.998975	0.999255	0.999169	0.999124	0.998955	0.998755	0.998981	0.99844	0.999337	0.999407	0.999122	0.999178	0.999345	0.999271	0.999188	0.999005	0.99888	0.999118	0.999069	0.999269	0.999835	0.999295	0.997292	0.998347	0.998714	0.998813	0.998613	0.998697	0.998053	0.997331	0.997154	0.998083	0.998628
0.05	0.993747	0.993605	0.995357	0.989772	0.99486	0.993919	0.99494	0.99314	0.995154	0.99488	0.995776	0.99277	0.993023	0.993069	0.991153	0.99866	0.996925	0.997766	0.997506	0.997372	0.996866	0.996264	0.996942	0.995319	0.99801	0.998222	0.997367	0.997533	0.998034	0.997813	0.997564	0.997016	0.996641	0.997353	0.997206	0.997807	0.999506	0.997884	0.991875	0.995042	0.996141	0.996439	0.99584	0.99609	0.994159	0.991994	0.991461	0.994249	0.995884
0.12	0.985409	0.985078	0.989167	0.976136	0.988006	0.98581	0.988194	0.983994	0.988692	0.988054	0.990145	0.98313	0.983721	0.983828	0.979356	0.996874	0.992824	0.994788	0.99418	0.993868	0.992687	0.991282	0.992865	0.989078	0.995356	0.995852	0.993856	0.994245	0.995412	0.994897	0.994316	0.993036	0.992163	0.993825	0.993482	0.994883	0.998847	0.995062	0.981042	0.988431	0.990997	0.991691	0.990292	0.990877	0.986371	0.981318	0.980076	0.98658	0.990396
0.25	0.968734	0.968025	0.976787	0.948862	0.974299	0.969593	0.974702	0.965702	0.975768	0.9744	0.978881	0.963849	0.965116	0.965346	0.955764	0.993301	0.984624	0.988831	0.98753	0.986859	0.98433	0.981318	0.98471	0.976596	0.99005	0.991112	0.986835	0.987667	0.990169	0.989064	0.98782	0.985078	0.983206	0.986767	0.986032	0.989035	0.997529	0.989418	0.959375	0.97521	0.980707	0.982195	0.979198	0.98045	0.970796	0.959968	0.957306	0.971243	0.979421
0.52	0.935384	0.933919	0.952027	0.894316	0.946886	0.937159	0.947717	0.929117	0.949921	0.947094	0.956355	0.925288	0.927907	0.928383	0.908579	0.986155	0.968222	0.976918	0.974228	0.972842	0.967616	0.961392	0.968401	0.951633	0.979436	0.981631	0.972792	0.974512	0.979682	0.977399	0.974828	0.969161	0.965293	0.972652	0.971134	0.977339	0.994894	0.978131	0.916042	0.948768	0.960128	0.963202	0.957009	0.959597	0.939645	0.917266	0.911766	0.94057	0.95747
1.05	0.868685	0.865706	0.902506	0.785222	0.892058	0.87229	0.893748	0.855947	0.898227	0.892482	0.911301	0.848166	0.853488	0.854455	0.814208	0.971863	0.93542	0.953091	0.947624	0.944809	0.934187	0.921538	0.935782	0.901705	0.958208	0.962669	0.944707	0.948201	0.958709	0.954069	0.948844	0.937326	0.929467	0.944422	0.941336	0.953948	0.989623	0.955556	0.829375	0.895883	0.918969	0.925217	0.912632	0.917891	0.877343	0.831864	0.820686	0.879222	0.913568
2.12	0.735285	0.72928	0.803465	0.567035	0.782402	0.742553	0.78581	0.709607	0.794839	0.783257	0.821195	0.693921	0.704651	0.7066	0.625468	0.943279	0.869814	0.905438	0.894418	0.888742	0.86733	0.84183	0.870545	0.801849	0.915753	0.924745	0.888536	0.89558	0.916762	0.907409	0.896877	0.873658	0.857815	0.887961	0.881742	0.907165	0.979082	0.910407	0.656042	0.790113	0.836653	0.849247	0.823878	0.834479	0.752739	0.66106	0.638527	0.756528	0.825765
3.78	0.60047	0.581707	0.666092	0.497985	0.612291	0.650262	0.658133	0.509556	0.62557	0.654373	0.749174	0.558002	0.551417	0.742671	0.465785	0.890406	0.776846	0.833948	0.82134	0.797428	0.777203	0.736912	0.786954	0.678585	0.84973	0.853383	0.814696	0.811154	0.85828	0.825134	0.823695	0.797205	0.782606	0.812715	0.799208	0.839765	0.950825	0.8452	0.436377	0.632546	0.703492	0.738579	0.702535	0.704694	0.585821	0.424647	0.402941	0.589942	0.702102
5.45	0.502294	0.469475	0.539202	0.544846	0.45389	0.604521	0.552351	0.338107	0.461431	0.550729	0.705307	0.472692	0.43696	0.879218	0.395332	0.81642	0.709672	0.770089	0.775457	0.696085	0.72584	0.685057	0.75053	0.639561	0.784513	0.763086	0.763576	0.723128	0.811316	0.727572	0.763052	0.75677	0.764875	0.783462	0.754196	0.793805	0.880783	0.79892	0.378747	0.499357	0.556712	0.653353	0.636094	0.576638	0.502235	0.279643	0.314475	0.498732	0.623736
7.12	0.427044	0.427328	0.463154	0.442165	0.563337	0.459863	0.530254	0.359466	0.418302	0.50905	0.595681	0.372102	0.318599	0.602859	0.585068	0.757828	0.640968	0.715846	0.730544	0.61418	0.679931	0.62371	0.701308	0.588414	0.727789	0.714168	0.705901	0.652405	0.76544	0.675587	0.720117	0.713438	0.724105	0.746266	0.709817	0.7481	0.820846	0.753001	0.311303	0.369739	0.426986	0.546424	0.557011	0.468398	0.426231	0.179211	0.240707	0.419717	0.54816
8.78	0.376605	0.400131	0.406606	0.367817	0.543635	0.385667	0.485431	0.379372	0.337768	0.470503	0.549378	0.308516	0.259675	0.388289	0.625798	0.736925	0.56833	0.686325	0.688128	0.582255	0.647376	0.537956	0.620756	0.507587	0.691858	0.703447	0.642175	0.597027	0.720527	0.664019	0.692885	0.667538	0.662068	0.675204	0.668327	0.703561	0.806944	0.708729	0.211005	0.252081	0.354358	0.362543	0.43311	0.434705	0.378752	0.246453	0.22223	0.386573	0.484474
10.5	0.355292	0.391206	0.372949	0.32673	0.372326	0.397593	0.411682	0.39764	0.215054	0.435487	0.571676	0.285018	0.265142	0.243394	0.505106	0.713681	0.512697	0.654007	0.649774	0.559025	0.612603	0.466094	0.551384	0.442311	0.65574	0.675641	0.618327	0.536368	0.673166	0.63414	0.661425	0.626915	0.62389	0.612671	0.6258	0.657935	0.787928	0.667046	0.122211	0.158615	0.289488	0.232362	0.334894	0.404102	0.335702	0.28083	0.197381	0.350775	0.426952
12.1	0.357336	0.383297	0.36564	0.282046	0.251098	0.30463	0.360185	0.309664	0.237939	0.404604	0.529335	0.282998	0.375461	0.303315	0.463738	0.684977	0.496741	0.615163	0.620899	0.556083	0.572657	0.426645	0.508102	0.413321	0.619189	0.636912	0.619976	0.472473	0.624241	0.592553	0.626776	0.590273	0.603711	0.60721	0.575675	0.604328	0.731416	0.644347	0.0824573	0.168287	0.257696	0.331115	0.346184	0.387576	0.312827	0.175096	0.143499	0.302881	0.410681
13.8	0.35095	0.365417	0.346043	0.238353	0.190394	0.213493	0.326548	0.231118	0.279286	0.371311	0.469305	0.274819	0.425308	0.325804	0.419461	0.653698	0.471749	0.576533	0.593223	0.548275	0.537475	0.379694	0.474324	0.371624	0.593583	0.62133	0.570631	0.451596	0.597249	0.538351	0.589572	0.555694	0.586646	0.595228	0.52866	0.554795	0.678171	0.622249	0.060616	0.165191	0.222675	0.401764	0.35178	0.376684	0.288769	0.0805638	0.0936001	0.260191	0.392005
15.5	0.311491	0.320095	0.281622	0.19859	0.264358	0.173454	0.331406	0.214079	0.317054	0.33037	0.386454	0.244387	0.292099	0.188271	0.345519	0.616949	0.426644	0.538359	0.568216	0.529637	0.512418	0.316803	0.459845	0.304128	0.590195	0.615668	0.499432	0.448292	0.579658	0.478742	0.551325	0.521957	0.570915	0.517308	0.513079	0.546444	0.657949	0.606223	0.140276	0.0897428	0.170703	0.324876	0.325113	0.397723	0.258002	0.0448362	0.0662726	0.244827	0.351677
17.1	0.267303	0.31059	0.292891	0.155	0.218855	0.12935	0.344478	0.185406	0.274152	0.278184	0.399916	0.148617	0.160035	0.138479	0.268251	0.581088	0.388948	0.507584	0.542989	0.512348	0.486119	0.273674	0.441968	0.25959	0.573039	0.585073	0.49513	0.427733	0.561354	0.47585	0.561565	0.475228	0.554149	0.443526	0.497372	0.537214	0.637004	0.5896	0.189039	0.0243936	0.125962	0.242563	0.300381	0.403417	0.225993	0.0163484	0.0445739	0.234437	0.316197
18.8	0.224117	0.307908	0.328146	0.122504	0.138006	0.0807364	0.357409	0.144246	0.20065	0.226565	0.445491	0.0393332	0.0331746	0.132579	0.199423	0.54703	0.366295	0.492532	0.517293	0.497925	0.457179	0.272538	0.417192	0.261665	0.527926	0.549729	0.50357	0.404129	0.542923	0.482967	0.579698	0.426206	0.5372	0.448375	0.479276	0.506892	0.598674	0.558636	0.0480033	0.021083	0.122206	0.126932	0.287536	0.314847	0.186943	0.0258696	0.054771	0.25223	0.356657
20.5	0.207028	0.224066	0.282336	0.193666	0.222112	0.00797456	0.33586	0.0355672	0.162909	0.218528	0.432599	0.0366417	-0.0553717	0.191845	0.209873	0.522639	0.350041	0.484342	0.490938	0.480729	0.431682	0.270225	0.388772	0.252313	0.498369	0.53889	0.485098	0.406274	0.532554	0.459379	0.561357	0.439657	0.534066	0.452951	0.461127	0.476571	0.560666	0.527672	-0.0587961	0.0180405	0.116456	0.0316553	0.272768	0.23793	0.150485	0.0341441	0.0584627	0.266625	0.395489
22.1	0.176311	0.188846	0.265791	0.229531	0.209451	-0.0194191	0.330998	-0.0226481	0.146721	0.163506	0.423422	0.00623819	-0.108537	0.161193	0.175697	0.517871	0.346782	0.490086	0.46325	0.457903	0.413173	0.265524	0.352954	0.219762	0.500394	0.528601	0.466146	0.408829	0.522584	0.42563	0.544116	0.450811	0.526849	0.430481	0.437788	0.450587	0.554429	0.498033	0.0854709	0.0169629	0.0960957	0.0856396	0.243894	0.24647	0.131372	0.0340749	0.0186191	0.258273	0.354543
23.8	0.132502	0.200339	0.277364	0.231484	0.103819	-0.00322381	0.342823	-0.0303997	0.151243	0.063343	0.417815	-0.0497457	-0.129044	0.0441496	0.100327	0.505157	0.346561	0.480637	0.439123	0.442011	0.397392	0.252253	0.320837	0.198394	0.496234	0.51868	0.447701	0.410531	0.51433	0.32196	0.537645	0.440501	0.488662	0.408012	0.414449	0.424604	0.548192	0.468394	0.190995	0.0164951	0.0787146	0.138426	0.216536	0.253682	0.118146	0.0428174	-0.0184308	0.248229	0.313596
25.5	0.119889	0.19025	0.240603	0.0936495	0.135981	-0.0864389	0.339795	-0.0476906	0.124668	0.112268	0.33883	0.0486536	-0.251303	0.13368	0.0896804	0.477687	0.351982	0.442972	0.421613	0.439579	0.386909	0.222348	0.295593	0.197797	0.480066	0.500756	0.428511	0.404568	0.502427	0.249022	0.529409	0.416126	0.456335	0.400569	0.406058	0.404133	0.519283	0.458047	0.0124082	0.0209603	0.0854415	0.181523	0.201452	0.250143	0.15256	0.116179	-0.0349926	0.22577	0.279064
27.1	0.110048	0.181786	0.218585	0.0350777	0.180186	-0.147785	0.333519	-0.0577497	0.0891837	0.142826	0.300767	0.116742	-0.35013	0.203219	0.059329	0.458675	0.327928	0.412242	0.405737	0.434145	0.378464	0.205258	0.280008	0.191305	0.465995	0.457489	0.406962	0.374332	0.478968	0.268278	0.515881	0.349561	0.441589	0.393591	0.398129	0.383833	0.489672	0.448298	-0.150755	0.0212987	0.0891802	0.218892	0.189399	0.245116	0.182724	0.182001	-0.0515815	0.20478	0.244662
28.8	0.09954	0.181315	0.238051	0.174317	0.221021	-0.141766	0.323283	-0.052377	0.0403609	0.115944	0.351232	0.106959	-0.388606	0.203766	-0.0152891	0.455372	0.249134	0.394393	0.392899	0.423134	0.373804	0.211969	0.282362	0.173868	0.455818	0.430052	0.375659	0.330728	0.45838	0.266969	0.503054	0.298826	0.441466	0.363784	0.377893	0.356716	0.492674	0.433517	-0.157959	-0.02009	0.0627062	0.198353	0.207996	0.222977	0.169912	0.171581	-0.0684437	0.198643	0.243315
30.5	0.135301	0.161723	0.222418	0.217352	0.236275	-0.151631	0.304766	-0.0616358	-0.0299881	0.0654893	0.373014	0.104278	-0.343749	0.173569	-0.0256146	0.452908	0.193214	0.371772	0.385839	0.400632	0.369308	0.21808	0.266134	0.14837	0.442809	0.428442	0.329103	0.266212	0.442282	0.233495	0.491278	0.271838	0.463278	0.332519	0.35673	0.329086	0.498131	0.418357	-0.175306	-0.0552717	0.0382296	0.178707	0.222328	0.202954	0.158016	0.153113	-0.0831491	0.193374	0.244078
32.1	0.170611	0.142937	0.196317	0.219499	0.24702	-0.166992	0.283585	-0.0792576	-0.105995	0.0187265	0.368425	0.116949	-0.301378	0.114534	-0.0270662	0.451934	0.179777	0.340665	0.389051	0.356793	0.365105	0.223123	0.218267	0.109149	0.424764	0.430107	0.323373	0.237503	0.418737	0.24361	0.471493	0.281809	0.452111	0.334435	0.355059	0.316839	0.485282	0.391931	-0.327424	-0.00798776	0.0402916	0.170908	0.180012	0.216074	0.158286	0.0277115	-0.0691992	0.199635	0.245366
33.8	0.0980289	0.172536	0.18166	0.178111	0.287753	-0.181786	0.264054	-0.115138	-0.173402	0.0374153	0.27558	0.203202	-0.430499	-0.0498449	-0.0996738	0.443254	0.169268	0.321973	0.388263	0.326863	0.358918	0.223279	0.199341	0.0766059	0.410648	0.434675	0.353848	0.240548	0.388587	0.292379	0.444885	0.324556	0.4117	0.340452	0.355796	0.306493	0.47017	0.364112	-0.474127	0.0353465	0.0400345	0.160955	0.139954	0.228192	0.158439	-0.0962063	-0.0539364	0.205289	0.246712
35.5	0.10493	0.184877	0.192545	0.178629	0.242996	-0.210204	0.233549	-0.135104	-0.212869	0.0377245	0.266774	0.214416	-0.490632	-0.0668829	-0.0681371	0.421454	0.163745	0.324419	0.380667	0.321664	0.349204	0.214743	0.229693	0.0554321	0.403517	0.445235	0.36146	0.226714	0.376988	0.306102	0.432855	0.323916	0.387583	0.34646	0.344861	0.307787	0.458958	0.363835	-0.517948	0.00363828	-0.00428776	0.110044	0.142796	0.221293	0.156779	-0.196881	-0.0181064	0.201423	0.255868
37.1	0.179539	0.182517	0.225188	0.214843	0.12243	-0.250703	0.192913	-0.141513	-0.228536	0.0223771	0.329556	0.161709	-0.491997	0.0415912	0.0486084	0.404396	0.155055	0.325375	0.367705	0.321695	0.342956	0.203044	0.238941	0.0503026	0.396681	0.458746	0.357295	0.204567	0.374945	0.302564	0.427686	0.302859	0.371133	0.352467	0.331702	0.311298	0.448489	0.368804	-0.561432	-0.0331264	-0.048481	0.064461	0.145127	0.214978	0.155094	-0.287869	0.0148178	0.197157	0.266294
38.8	0.145291	0.121399	0.206052	0.084776	0.180726	-0.16231	0.251431	-0.14197	-0.142578	0.0177318	0.236324	0.19842	-0.51288	0.055071	-0.0533768	0.395075	0.1412	0.323896	0.34561	0.33063	0.34261	0.185959	0.212253	0.0713506	0.390325	0.454215	0.325288	0.191652	0.355359	0.329841	0.449127	0.279178	0.335103	0.347108	0.327464	0.303472	0.444336	0.375115	-0.596848	-0.191246	-0.0895782	0.191142	0.130909	0.227565	0.152817	-0.1948	-0.0219987	0.183311	0.252804
40.5	0.116876	0.116665	0.19632	-0.00773764	0.208301	-0.1025	0.279436	-0.158258	-0.102133	0.0448048	0.181098	0.215213	-0.458559	0.0328589	-0.157926	0.388939	0.133479	0.318166	0.320838	0.324916	0.345764	0.170246	0.195306	0.0717473	0.383787	0.445722	0.28717	0.180764	0.331922	0.363882	0.476018	0.25496	0.295062	0.338906	0.325597	0.292449	0.441964	0.381805	-0.628055	-0.342136	-0.128696	0.316657	0.116889	0.238907	0.150072	-0.104335	-0.0560762	0.169029	0.233704
42.1	0.112202	0.224857	0.210191	-0.0107989	0.157619	-0.114146	0.23902	-0.204525	-0.152108	0.127265	0.208038	0.190081	-0.274436	-0.041613	-0.251322	0.387783	0.135768	0.305498	0.291699	0.295301	0.354392	0.156679	0.193593	0.0384499	0.376951	0.456161	0.315856	0.171171	0.334993	0.301935	0.444559	0.225729	0.303272	0.347673	0.312299	0.271309	0.436103	0.373281	-0.453059	-0.13879	-0.0708316	0.385073	0.122347	0.189227	0.124383	-0.0980742	-0.00159255	0.140658	0.228596
43.8	0.0647774	0.156206	0.192704	0.0411183	0.17754	-0.0999671	0.19484	-0.224406	-0.110294	0.0687058	0.161013	0.164014	-0.236893	-0.00973029	-0.223028	0.38597	0.127601	0.3065	0.267058	0.271039	0.346064	0.141998	0.194074	0.00619605	0.370519	0.469226	0.343691	0.162086	0.337362	0.240875	0.412145	0.200837	0.311985	0.361797	0.29519	0.246797	0.429079	0.359687	-0.278064	0.0645564	-0.012967	0.453489	0.127805	0.139546	0.098694	-0.0918136	0.0528911	0.112286	0.227908
45.5	0.0141909	0.0510312	0.172667	0.0935257	0.222717	-0.0873029	0.155297	-0.219802	-0.0663056	-0.00328345	0.114056	0.129451	-0.213891	0.0406847	-0.157589	0.383127	0.103082	0.328881	0.249453	0.25551	0.311214	0.125573	0.197987	-0.0244256	0.364718	0.50103	0.329735	0.15822	0.318949	0.23602	0.394654	0.221918	0.300114	0.36037	0.295108	0.23184	0.426988	0.329998	-0.288799	0.0479824	-0.0309917	0.351406	0.122452	0.164233	0.0923373	-0.137743	0.00776306	0.11036	0.212241
47.1	0.0140748	0.0401914	0.186118	0.0690741	0.281375	-0.121849	0.144201	-0.134144	-0.145558	0.0648133	0.16245	0.0573887	-0.0600349	0.0264765	-0.0792851	0.381034	0.0721127	0.32786	0.235638	0.241813	0.29048	0.115961	0.195261	-0.0279635	0.356053	0.517617	0.314526	0.160966	0.299156	0.239063	0.382229	0.244671	0.28976	0.352895	0.301646	0.220598	0.426817	0.294051	-0.299535	0.0314083	-0.0490165	0.249322	0.116989	0.189671	0.0859806	-0.183672	-0.037365	0.108433	0.191035
48.8	0.051736	0.0848807	0.206034	0.0388696	0.281034	-0.0474624	0.156202	-0.122576	-0.188281	0.0450659	0.219717	0.0159499	0.0164831	0.0489997	-0.0771132	0.380067	0.0314683	0.290235	0.22775	0.230982	0.292775	0.117464	0.181705	0.012688	0.342713	0.47696	0.294603	0.188587	0.274169	0.270109	0.386762	0.273351	0.284784	0.350306	0.298443	0.21568	0.409216	0.295055	-0.413929	-0.0841	-0.0162444	0.204376	0.101706	0.187661	0.114434	-0.0775715	-0.0461141	0.107771	0.192494
50.5	0.116753	0.169781	0.230375	0.00575468	0.240746	0.10277	0.183488	-0.164661	-0.204552	-0.0382927	0.28315	-0.00331326	0.0369977	0.0981215	-0.130071	0.372241	0.00497028	0.250461	0.214785	0.217987	0.291241	0.111262	0.184767	0.0287512	0.330781	0.445887	0.279894	0.170265	0.258607	0.283201	0.383815	0.279585	0.270735	0.349914	0.290656	0.213738	0.383414	0.313449	-0.530437	-0.202668	0.0180987	0.161197	0.0861195	0.184802	0.143964	0.0332311	-0.053738	0.107147	0.204136
52.1	0.0616662	0.133987	0.229188	0.0802871	0.304638	-0.0476805	0.135053	-0.148816	-0.165203	-0.0996035	0.264261	0.0328235	0.0642319	0.177128	-0.0475955	0.353223	0.00155297	0.207183	0.193536	0.201464	0.28346	0.0930071	0.213823	0.00469675	0.321148	0.434271	0.275304	0.0627608	0.262178	0.261439	0.366348	0.242245	0.239074	0.332334	0.29755	0.21618	0.378949	0.313981	-0.540965	-0.219185	0.067044	0.22618	0.0912278	0.18266	0.115682	0.00621265	-0.0475513	0.142348	0.190716
53.8	0.0139067	0.123628	0.214355	0.0959831	0.311381	-0.117276	0.0928482	-0.166229	-0.14903	-0.117852	0.229769	0.0647327	0.0644735	0.26089	0.0111037	0.354889	-0.0101296	0.201299	0.192999	0.195289	0.275	0.0848485	0.219126	-0.00690801	0.318393	0.417972	0.281198	0.0115278	0.262432	0.24127	0.3648	0.222688	0.216326	0.305087	0.312702	0.221195	0.386486	0.304024	-0.545914	-0.229188	0.116758	0.296856	0.0974254	0.180555	0.0849911	-0.0265484	-0.0407891	0.179041	0.163801
55.5	-0.0237341	0.14987	0.18068	0.0304287	0.235884	-0.0705195	0.0599902	-0.239836	-0.172523	-0.0662036	0.172173	0.0888314	0.0205636	0.351917	0.0304746	0.387581	-0.0342099	0.251506	0.223529	0.2053	0.26552	0.0918343	0.1888	0.000162	0.325956	0.39639	0.298916	0.0237495	0.258944	0.222896	0.380497	0.223184	0.203628	0.291037	0.310887	0.216781	0.380349	0.304524	-0.539752	-0.209116	0.0821072	0.249722	0.0945791	0.162398	0.122875	-0.0155034	0.0198038	0.160113	0.167417
57.1	-0.032521	0.097765	0.185661	0.0388725	0.311679	-0.0726408	0.124877	-0.177718	-0.156652	-0.103234	0.147248	0.0769283	-0.0371214	0.29805	-0.123145	0.402887	-0.0343971	0.282866	0.238473	0.210511	0.270941	0.108694	0.172306	0.00348037	0.320973	0.387004	0.30727	0.0312612	0.243076	0.238773	0.403632	0.227465	0.206288	0.285785	0.297761	0.205815	0.364711	0.312292	-0.532881	-0.186781	0.0411064	0.19372	0.091052	0.143033	0.165136	-0.00166232	0.0838328	0.137636	0.190553
58.8	-0.0225887	0.0449459	0.2002	0.0446083	0.389979	-0.0839148	0.196856	-0.109406	-0.125808	-0.141094	0.126963	0.042861	-0.0682352	0.211157	-0.246245	0.394183	-0.0015888	0.2882	0.231896	0.209094	0.296941	0.139188	0.174917	0.00161865	0.29936	0.385415	0.309637	0.0358861	0.219292	0.275641	0.431136	0.233967	0.218361	0.285373	0.287508	0.192305	0.354853	0.314242	-0.575836	-0.233529	0.0159474	0.152936	0.0795116	0.144142	0.155894	-0.0770413	0.0545727	0.116392	0.195233
60.5	0.0288081	0.0512623	0.21833	-0.013102	0.357857	-0.0869897	0.21269	-0.153519	-0.0769291	-0.0879812	0.0925723	-0.0438616	0.0207113	0.13705	-0.0849568	0.38833	-5.11e-05	0.270978	0.210645	0.21117	0.301732	0.14648	0.161783	0.00357584	0.279086	0.392538	0.299326	0.00994652	0.218188	0.248148	0.433186	0.240556	0.233071	0.288612	0.279423	0.176798	0.349537	0.311802	-0.623125	-0.286284	-0.00764486	0.113656	0.0671786	0.147031	0.142775	-0.159136	0.0182908	0.0952564	0.186547
62.1	0.0528842	0.0580841	0.220291	-0.0766346	0.34442	-0.068975	0.201154	-0.190807	-0.0712985	-0.0535332	0.0557723	-0.0287933	0.0327081	0.160492	-0.025864	0.386106	-0.039965	0.225051	0.170717	0.217692	0.27953	0.124241	0.128612	0.0103934	0.260518	0.402565	0.284789	-0.0256449	0.224246	0.20033	0.427633	0.247172	0.248568	0.282064	0.274701	0.176991	0.350682	0.292208	-0.629791	-0.220941	0.0424469	0.101989	0.0853881	0.158034	0.167568	-0.0826882	0.0312398	0.114254	0.182729
63.8	0.0607072	0.0653227	0.21407	-0.137231	0.341954	-0.0431491	0.174996	-0.2228	-0.0946392	-0.0323641	0.0218124	0.0432324	-0.00460989	0.240123	-0.0292908	0.369893	-0.0629971	0.199061	0.164096	0.215293	0.263841	0.0956842	0.118706	0.00449251	0.251639	0.367874	0.280658	0.00133175	0.229042	0.136874	0.431265	0.262311	0.237341	0.266838	0.272962	0.191678	0.357792	0.256779	-0.632439	-0.143918	0.099826	0.0930521	0.106618	0.169839	0.196111	0.00943935	0.0490579	0.13722	0.183228
65.5	0.0517098	0.0757406	0.225179	-0.0487533	0.350557	-0.12712	0.183738	-0.2184	-0.124801	-0.077125	0.129477	-0.0603339	-0.111513	0.203343	-0.113563	0.335878	-0.0645433	0.199498	0.201627	0.201069	0.256441	0.0590862	0.137238	-0.0169533	0.254602	0.330596	0.276159	0.0343778	0.233965	0.074723	0.437353	0.273283	0.222913	0.26523	0.266294	0.191304	0.35507	0.229637	-0.497121	-0.181584	0.111947	0.0878807	0.111528	0.142641	0.162873	0.0057427	0.0317286	0.111132	0.173246
67.1	0.0403476	0.074273	0.24688	0.00647106	0.318239	-0.173703	0.207543	-0.20201	-0.114022	-0.106709	0.171224	-0.0895026	-0.167649	0.146152	-0.0946826	0.329476	-0.0727075	0.198283	0.230195	0.177689	0.242014	0.0512244	0.144507	-0.0117301	0.25665	0.338576	0.242702	0.0506537	0.243659	0.06675	0.469408	0.191001	0.191819	0.278376	0.254286	0.173946	0.341697	0.211838	-0.346473	-0.231994	0.118475	0.0831746	0.11442	0.110124	0.121999	-0.00979739	0.00960646	0.0783553	0.152354
68.8	0.026095	0.0582786	0.281015	0.0226593	0.233838	-0.172701	0.250518	-0.169064	-0.0467046	-0.115333	0.125592	-0.0200511	-0.15649	0.0629841	0.0554824	0.356824	-0.0889603	0.195047	0.247809	0.143118	0.218643	0.0799361	0.137442	0.0274353	0.257532	0.347119	0.218098	0.0558083	0.248351	0.0635159	0.487881	0.131537	0.169126	0.287223	0.252224	0.152053	0.333008	0.201536	-0.442365	-0.218068	0.108079	0.214784	0.0937575	0.139168	0.121425	-0.0232554	-0.0483659	0.0719511	0.145851
70.5	0.0331142	0.0230635	0.249449	0.0455618	0.351519	-0.25255	0.313008	-0.17744	-0.00614215	-0.120733	0.101898	-0.0753015	-0.0925966	0.0438791	0.0224666	0.363079	-0.0918403	0.197454	0.258165	0.138994	0.205299	0.103124	0.125852	0.0416962	0.25996	0.358067	0.233823	0.0135508	0.231718	0.0792375	0.452031	0.163347	0.180037	0.290371	0.263347	0.123897	0.330529	0.201171	-0.578391	-0.193669	0.0949281	0.368584	0.0692608	0.178234	0.126872	-0.0364295	-0.111695	0.0694876	0.157661
72.1	0.0510378	-0.0212316	0.216084	0.0534626	0.435248	-0.308887	0.353905	-0.194712	0.00323213	-0.122969	0.0900666	-0.14916	-0.0281784	0.0474001	0.00195219	0.343551	-0.0783755	0.206759	0.259283	0.17362	0.204209	0.119562	0.108732	0.0255179	0.264355	0.367681	0.241611	-0.011671	0.217813	0.10341	0.419762	0.188809	0.185538	0.28951	0.265561	0.109033	0.326562	0.190689	-0.506833	-0.142556	0.0752975	0.417641	0.0922055	0.156862	0.120703	-0.104706	-0.11776	0.100051	0.158604
73.8	0.0893134	-0.0817163	0.206769	0.0178481	0.330761	-0.263083	0.327111	-0.213435	-0.0734604	-0.116982	0.101575	-0.195262	0.00183894	0.082741	0.139836	0.337356	-0.067706	0.190019	0.259243	0.204974	0.213394	0.115532	0.102399	0.0282626	0.257301	0.374586	0.233284	-0.00230531	0.209449	0.144741	0.394446	0.201948	0.180537	0.282635	0.253844	0.114963	0.32027	0.164385	-0.401482	-0.0870931	0.0545234	0.448214	0.123522	0.12565	0.112642	-0.181952	-0.114503	0.135992	0.143245
75.5	0.0967094	-0.0810808	0.192785	0.0318305	0.337709	-0.158213	0.339729	-0.219879	-0.109029	-0.131795	0.133777	-0.15018	0.0394384	0.113559	0.127027	0.347457	-0.060453	0.142706	0.257788	0.232328	0.235137	0.0864862	0.109252	0.0541351	0.236254	0.393612	0.223507	0.00276261	0.206594	0.156622	0.390865	0.211191	0.201765	0.274347	0.245301	0.119903	0.313609	0.156502	-0.395438	-0.00991877	0.0612646	0.423737	0.107767	0.121216	0.100785	-0.228381	-0.0577134	0.107553	0.132012
77.1	0.0878217	-0.0570426	0.177577	0.0687076	0.400196	-0.0300042	0.366218	-0.219169	-0.120278	-0.155192	0.177407	-0.0687986	0.0689619	0.146154	0.031824	0.357586	-0.0733365	0.144905	0.248743	0.236512	0.253652	0.0816619	0.101449	0.0551221	0.228539	0.426307	0.212095	0.00317465	0.209709	0.136601	0.409906	0.216376	0.250293	0.263548	0.242402	0.123084	0.306294	0.181369	-0.408309	0.0713911	0.0732468	0.388773	0.0830457	0.122266	0.088149	-0.268941	0.0100411	0.0659292	0.127805
78.8	0.0621018	-0.137989	0.179234	0.0815594	0.433396	-0.0626846	0.291919	-0.219522	-0.128343	-0.129778	0.217746	-0.187944	-0.092	0.258787	-0.0871894	0.367745	-0.109859	0.205228	0.230786	0.213494	0.268379	0.105271	0.076441	0.0268957	0.235858	0.42354	0.195904	0.00251707	0.208523	0.171788	0.401297	0.25859	0.237698	0.248929	0.239945	0.126229	0.298172	0.205905	-0.474795	0.0648154	0.106086	0.202909	0.122635	0.114557	0.0745773	-0.295559	0.0475064	0.0715549	0.131559
80.5	0.0508386	-0.115059	0.186794	0.0799891	0.342612	-0.10054	0.246756	-0.231843	-0.168933	-0.120043	0.227888	-0.208733	-0.209786	0.278633	-0.134036	0.381603	-0.108336	0.206379	0.214476	0.194706	0.271431	0.0967072	0.0687332	-0.00681526	0.243069	0.399947	0.176906	0.0012313	0.204809	0.238029	0.377135	0.321632	0.190723	0.226559	0.238384	0.129298	0.288333	0.22974	-0.553049	0.0376246	0.143818	-0.0183516	0.177309	0.104792	0.0608	-0.319116	0.0783229	0.0875525	0.150766
82.1	0.0558774	0.0250074	0.20101	0.0627949	0.117512	-0.144001	0.233159	-0.259393	-0.250917	-0.130263	0.199599	-0.0991419	-0.270339	0.175482	-0.0852204	0.399467	-0.0655992	0.143425	0.19995	0.180501	0.261835	0.0532878	0.0797669	-0.0464679	0.250161	0.412752	0.18072	0.0020024	0.207542	0.256938	0.388106	0.327447	0.177886	0.213663	0.234009	0.126354	0.280659	0.233507	-0.426711	0.0586986	0.121334	0.00625652	0.181478	0.112479	0.0545593	-0.364085	0.0833515	0.0764073	0.171722
83.8	0.031917	-0.0252443	0.230615	0.11045	0.148545	-0.141911	0.216779									0.396694	-0.0490459	0.124727	0.197732	0.17951	0.257745	0.0417343	0.0835269	-0.0617774	0.244591	0.437689	0.192138	0.00345912	0.212424	0.260068	0.410172	0.316168	0.175246	0.223963	0.222739	0.10795	0.278286	0.188141	-0.249225	0.0926024	0.0828449	0.100212	0.171404	0.124804	0.050322	-0.414746	0.0815251	0.0580469	0.196958
85.5	0.00181465	-0.0624238	0.240826	0.16117	0.174636	-0.12787	0.210531									0.372442	-0.0597452	0.152089	0.208326	0.192272	0.259618	0.0633474	0.0797161	-0.0517503	0.22584	0.403984	0.219317	0.00782693	0.190493	0.227708	0.401485	0.281339	0.173115	0.230858	0.212854	0.0942791	0.277342	0.15213	-0.258077	0.104751	0.078337	0.140466	0.153089	0.126044	0.0454709	-0.379141	0.0723321	0.0579116	0.208267
87.1	-0.0339811	-0.0181507	0.203636	0.200871	0.119268	-0.0997608	0.2276									0.336908	-0.0826899	0.172221	0.213817	0.183267	0.254987	0.0627657	0.0582626	-0.0469419	0.216633	0.36303	0.247657	0.0126211	0.165248	0.191146	0.389066	0.244362	0.171377	0.227539	0.207122	0.094809	0.280685	0.144177	-0.322589	0.110401	0.0839793	0.16468	0.132313	0.123973	0.0404364	-0.317768	0.0609387	0.0632203	0.179938
88.8	-0.00933655	0.00614476	0.237873	0.193557	0.0955919	-0.10089	0.213188									0.290534	-0.11788	0.185124	0.214203	0.152494	0.244108	0.0408597	0.0198585	-0.0471476	0.216595	0.393084	0.198057	0.0240039	0.159702	0.17284	0.380046	0.244706	0.185494	0.225232	0.200939	0.0991139	0.282563	0.142913	-0.323587	0.020508	0.0941968	0.0607306	0.13169	0.0827647	0.0560484	-0.31597	0.0713365	0.0545627	0.166116
90.5	0.0381635	0.00823968	0.281611	0.175786	0.103556	-0.103285	0.192386									0.274435	-0.124728	0.195043	0.207167	0.133695	0.219668	0.0515492	0.0200163	-0.0353038	0.219538	0.420044	0.157528	0.0350691	0.15789	0.153032	0.370175	0.244027	0.196679	0.226516	0.193158	0.11762	0.279247	0.165357	-0.303413	-0.101232	0.106022	-0.0882484	0.138147	0.0278047	0.0789145	-0.335103	0.0893905	0.040998	0.200858
92.1	0.081677	-0.0783158	0.203027	0.206089	0.230168	-0.0380627	0.210757									0.28628	-0.105414	0.202209	0.193278	0.125948	0.182712	0.092327	0.0543705	-0.0127746	0.225124	0.429478	0.164628	0.0444663	0.175676	0.125347	0.356149	0.238355	0.192462	0.227843	0.186913	0.132315	0.278836	0.183879	-0.318809	-0.137975	0.0999599	-0.0549739	0.12372	0.0599201	0.0731039	-0.202578	0.0800222	0.0201017	0.224581
93.8	0.0887434	-0.118215	0.176913	0.217331	0.175841	-0.0390208	0.21377									0.271798	-0.0905384	0.18717	0.184095	0.122392	0.179336	0.0925172	0.0744223	-0.00741948	0.226314	0.439452	0.168	0.0511727	0.183571	0.102639	0.34751	0.239777	0.185539	0.229365	0.18767	0.128406	0.291657	0.18453	-0.348038	-0.141664	0.0869423	0.0491769	0.101171	0.125898	0.0561412	-0.0110762	0.0599896	-0.00364567	0.204228
95.5	0.0659893	-0.118371	0.193729	0.212979	-0.0265259	-0.0941266	0.204217									0.235775	-0.079444	0.153216	0.178921	0.122407	0.204566	0.0581328	0.0822906	-0.0166941	0.223757	0.450688	0.162674	0.0516001	0.168389	0.0910106	0.350858	0.256989	0.172595	0.22511	0.188982	0.123089	0.298812	0.18205	-0.459992	-0.0821891	0.123591	0.0838766	0.0846253	0.110985	0.0524858	-0.0201028	0.0417894	0.00686242	0.191592
97.1	0.0231351	-0.136332	0.176452	0.125092	0.0641674	-0.134339	0.143946									0.257625	-0.081395	0.142539	0.182005	0.128912	0.215366	0.0345284	0.0795493	-0.0171344	0.22025	0.452521	0.150895	0.0461041	0.162375	0.101819	0.346	0.267437	0.164788	0.188119	0.193437	0.109129	0.271161	0.160328	-0.607402	0.0043563	0.181526	0.0888114	0.0706519	0.0630317	0.0542658	-0.107113	0.0243017	0.0313622	0.219465
98.8	-0.00387555	-0.143699	0.165396	0.0447542	0.185742	-0.148286	0.105419									0.326826	-0.0940196	0.150908	0.191847	0.140726	0.213875	0.019744	0.0681274	-0.0103467	0.215931	0.442386	0.130906	0.0330692	0.168029	0.141184	0.331111	0.269618	0.163261	0.152536	0.197566	0.0969947	0.247097	0.14182	-0.600293	-0.0623075	0.141464	0.0760441	0.0797975	0.0776951	0.0592906	-0.104862	0.0302446	0.0906938	0.235227
100	-0.00285918	-0.134987	0.166821	-0.000181	0.297698	-0.125399	0.108977									0.359876	-0.110438	0.150958	0.195834	0.152808	0.205034	0.00697911	0.0573144	-0.00350358	0.21713	0.427015	0.121195	0.0191269	0.167225	0.146368	0.318292	0.260996	0.162012	0.134875	0.198659	0.0989278	0.250711	0.149423	-0.544426	-0.16122	0.080079	0.0609181	0.0940561	0.108936	0.0639738	-0.0752928	0.0419134	0.144903	0.181899
[truncated: 19 more columns]
