# Supplementary material for: ESCO1 and CTCF enable formation of long chromatin loops by protecting cohesinSTAG1 from WAPL
Source: eLife journal article supplement (doi:10.7554/elife.52091), 2020-02-17
Supplement: supp [file elife_poa_e52091_Figure_3_figure_supplement_1_source_data_2.xlsx]

## Sheet: Sheet1
-	control RNAi G2																					sororin RNAi G2
0	1	1	1	1	1	1	1	1	1	1	1	1	1	1	1	1	1	1	1	1	1	1	1	1	1	1	1	1	1	1	1	1	1	1	1	1	1	1	1
1	0.981009	0.983836	0.981229	0.976938	0.98167	0.986127	0.986498	0.979619	0.986206	0.997093	0.989413	0.957933	0.997499	0.991152	1.01763	0.96173	0.939791	0.977832	1.0013	1.00202	1.02326	1.01302	1.00234	0.939688	0.941215	0.962305	0.993102	0.935135	0.949272	1.00895	0.999839	1.02528	0.990188	1.00682	1.01112	0.924811	0.992251	0.902165	1.01352
2	0.866391	0.889767	0.902208	0.854919	0.922112	0.935376	0.88954	0.910895	0.87249	0.916311	0.86763	0.80321	0.895264	0.904367	0.911421	0.838803	0.928454	0.914551	0.897004	0.89969	0.904591	0.923957	0.863218	0.822905	0.813272	0.845444	0.924607	0.873431	0.884042	0.954754	0.922116	0.948134	0.931885	0.961194	0.928923	0.868174	0.949693	0.87229	0.960442
3	0.80781	0.840637	0.860837	0.830464	0.827389	0.895547	0.87657	0.899974	0.826637	0.871621	0.818217	0.77931	0.832627	0.869601	0.839318	0.777937	0.953798	0.885278	0.868901	0.8443	0.85431	0.885448	0.807356	0.773075	0.864932	0.76032	0.880514	0.854536	0.862272	0.865605	0.855202	0.979797	0.903001	0.920356	0.900157	0.839636	0.865517	0.911911	0.872687
4	0.777037	0.815423	0.822753	0.810134	0.834646	0.865912	0.813864	0.861702	0.778286	0.874416	0.78081	0.733577	0.801924	0.83421	0.787382	0.74612	0.85185	0.847095	0.852273	0.821654	0.827814	0.848954	0.729417	0.705401	0.803059	0.716588	0.86151	0.799783	0.818773	0.83481	0.85358	0.906078	0.847363	0.858933	0.902476	0.796459	0.799436	0.786272	0.821174
5	0.738936	0.798978	0.791899	0.79485	0.780678	0.827813	0.783274	0.838347	0.773857	0.830247	0.795431	0.719555	0.734409	0.814596	0.731498	0.687415	0.822809	0.810474	0.838867	0.774763	0.78609	0.802787	0.701326	0.713006	0.785818	0.656243	0.814108	0.802553	0.763619	0.83673	0.841136	0.875632	0.807361	0.871158	0.88177	0.73699	0.760522	0.818464	0.759151
6	0.709087	0.762829	0.763922	0.77884	0.761464	0.779626	0.767726	0.817444	0.787744	0.875136	0.747472	0.677044	0.710584	0.768662	0.72399	0.658089	0.737723	0.759747	0.80084	0.736735	0.72344	0.773068	0.673871	0.599704	0.768884	0.629138	0.771981	0.77647	0.726835	0.837159	0.810132	0.90586	0.803452	0.833712	0.840746	0.694566	0.760896	0.731088	0.762419
7	0.665582	0.734577	0.723072	0.740678	0.715031	0.761294	0.741953	0.782955	0.753763	0.827679	0.744893	0.659445	0.677863	0.723129	0.672449	0.646487	0.735933	0.720001	0.794575	0.714315	0.715737	0.727456	0.66672	0.596317	0.703891	0.581573	0.780468	0.723443	0.725118	0.831105	0.751919	0.826237	0.792175	0.83037	0.825239	0.659522	0.705406	0.745568	0.713152
8	0.652519	0.710631	0.691437	0.742089	0.669154	0.73522	0.700599	0.756238	0.73265	0.812706	0.71653	0.604313	0.671128	0.711852	0.647349	0.617437	0.722745	0.718032	0.757379	0.697663	0.675212	0.705691	0.617285	0.572285	0.708907	0.578272	0.708294	0.69861	0.703713	0.785315	0.755146	0.821827	0.779951	0.826926	0.772987	0.640807	0.636151	0.717895	0.697791
9	0.621277	0.710576	0.669139	0.719981	0.653345	0.699235	0.692911	0.760203	0.720976	0.800222	0.714183	0.632554	0.672969	0.691172	0.611136	0.564948	0.664468	0.71164	0.753738	0.668568	0.677881	0.668603	0.626623	0.558022	0.641884	0.53515	0.709721	0.694602	0.66039	0.757099	0.744328	0.843266	0.754761	0.818916	0.782872	0.584524	0.674014	0.683108	0.669254
10	0.597656	0.675684	0.665311	0.727176	0.637049	0.692963	0.651586	0.746487	0.703711	0.805439	0.693328	0.589475	0.663173	0.680344	0.615411	0.561279	0.686665	0.676377	0.759652	0.674412	0.663298	0.662234	0.57785	0.52918	0.602127	0.531169	0.693566	0.692835	0.646455	0.74482	0.714621	0.799234	0.736104	0.828118	0.738848	0.634583	0.633694	0.683827	0.669897
11	0.578273	0.651738	0.659345	0.708655	0.628948	0.65281	0.628371	0.703876	0.686156	0.836753	0.690386	0.567111	0.637663	0.663561	0.570124	0.540223	0.671594	0.633401	0.748538	0.678504	0.647404	0.628218	0.575824	0.48924	0.57165	0.489063	0.651774	0.66751	0.618666	0.75171	0.703355	0.761564	0.720118	0.797426	0.757927	0.532572	0.59129	0.637948	0.608933
12	0.584465	0.628381	0.616635	0.696966	0.599918	0.622044	0.634153	0.713152	0.68482	0.781199	0.690647	0.556201	0.635624	0.654771	0.54813	0.511194	0.634754	0.635842	0.74758	0.64263	0.618232	0.604858	0.5531	0.492951	0.545085	0.481131	0.643431	0.632254	0.586879	0.71988	0.717591	0.727308	0.703165	0.792885	0.747488	0.544548	0.594504	0.605051	0.61401
13	0.556931	0.628198	0.604505	0.713907	0.5783	0.594366	0.63641	0.684199	0.69212	0.78051	0.689864	0.533401	0.610232	0.651493	0.555543	0.487555	0.62157	0.65599	0.726588	0.641471	0.598028	0.577932	0.535364	0.451945	0.534067	0.481684	0.603214	0.636011	0.557737	0.70676	0.680398	0.721216	0.696774	0.745911	0.70993	0.490865	0.559889	0.582536	0.541979
14	0.521167	0.616211	0.58585	0.709569	0.561495	0.575812	0.607164	0.678098	0.674552	0.791113	0.696457	0.538661	0.579622	0.639548	0.549879	0.47418	0.630051	0.629978	0.706003	0.611494	0.568987	0.558733	0.532516	0.423923	0.52639	0.479812	0.62912	0.626816	0.535478	0.681508	0.710352	0.746882	0.687314	0.766292	0.71277	0.499703	0.579573	0.642409	0.571587
15	0.503737	0.587298	0.566183	0.680518	0.538772	0.557256	0.600559	0.668527	0.670992	0.77478	0.679227	0.542456	0.572772	0.632968	0.539493	0.455543	0.625786	0.6044	0.688601	0.583132	0.560002	0.547348	0.508056	0.467544	0.51299	0.439627	0.596153	0.632982	0.573698	0.723529	0.662551	0.7129	0.656797	0.713266	0.696195	0.417471	0.574372	0.589984	0.579606
16	0.477943	0.592347	0.569404	0.679196	0.521539	0.558845	0.580215	0.658347	0.655239	0.777669	0.69072	0.538879	0.5645	0.617715	0.513558	0.450646	0.637118	0.604403	0.678241	0.571128	0.527734	0.530579	0.503833	0.406448	0.495605	0.422452	0.610739	0.622045	0.554925	0.690443	0.664107	0.711018	0.631147	0.720359	0.660594	0.468842	0.55204	0.531192	0.554257
17	0.479814	0.57287	0.547583	0.67308	0.521889	0.541664	0.564622	0.656407	0.638771	0.797555	0.657939	0.535196	0.546494	0.602966	0.524373	0.433531	0.622361	0.546436	0.657448	0.528574	0.540555	0.529102	0.493041	0.37691	0.488194	0.408667	0.598385	0.603704	0.519593	0.694896	0.678037	0.694041	0.65871	0.717797	0.71866	0.419519	0.557304	0.609689	0.545352
18	0.497384	0.545072	0.52931	0.672103	0.506509	0.542946	0.53754	0.612657	0.625426	0.740033	0.639026	0.496788	0.560142	0.592917	0.493655	0.405835	0.673215	0.554042	0.63876	0.531472	0.519377	0.52693	0.470027	0.345655	0.455422	0.418398	0.545484	0.575529	0.488871	0.653483	0.612246	0.70427	0.607105	0.702027	0.707671	0.423653	0.490068	0.507427	0.545665
19	0.463742	0.54628	0.515167	0.660444	0.52023	0.549491	0.565533	0.610337	0.623247	0.736114	0.630443	0.4913	0.548732	0.588738	0.503932	0.362217	0.603624	0.528593	0.644172	0.530473	0.508678	0.503876	0.48947	0.33091	0.479706	0.392706	0.583269	0.539334	0.496908	0.62872	0.638875	0.73646	0.610107	0.713153	0.689424	0.383411	0.493104	0.429658	0.439874
20	0.456042	0.507349	0.516393	0.656122	0.509013	0.520386	0.522737	0.597332	0.6186	0.713081	0.641494	0.459133	0.517474	0.564975	0.466874	0.366272	0.589199	0.513486	0.635319	0.508497	0.491252	0.500888	0.470366	0.380643	0.483178	0.378573	0.552435	0.565551	0.505225	0.601046	0.597823	0.6352	0.624674	0.680476	0.680043	0.400392	0.483479	0.459015	0.442312
21	0.43711	0.498921	0.505059	0.648942	0.495052	0.50855	0.522741	0.586913	0.614736	0.714307	0.635091	0.457156	0.515618	0.567814	0.454732	0.365967	0.593624	0.492347	0.613073	0.468767	0.478039	0.508848	0.47189	0.339501	0.466141	0.375727	0.567882	0.534727	0.471991	0.617491	0.595641	0.688678	0.61367	0.674239	0.649127	0.392396	0.462191	0.497796	0.415222
22	0.427546	0.519006	0.495552	0.636518	0.470761	0.511669	0.520093	0.593855	0.571396	0.70428	0.630161	0.449306	0.489104	0.550647	0.431726	0.357392	0.613045	0.473732	0.604228	0.497338	0.468616	0.493817	0.456157	0.355591	0.41998	0.349357	0.525523	0.542584	0.452998	0.623314	0.545966	0.632351	0.608921	0.695282	0.650007	0.40793	0.428349	0.484899	0.4207
23	0.424369	0.502804	0.516045	0.625011	0.458733	0.48359	0.497759	0.584307	0.568759	0.694933	0.611571	0.427265	0.489346	0.544247	0.425321	0.35704	0.561786	0.477345	0.60808	0.469606	0.477669	0.497243	0.424086	0.389785	0.482503	0.343612	0.543972	0.539748	0.467655	0.593886	0.559776	0.64674	0.570893	0.691076	0.674706	0.333108	0.43992	0.440344	0.425079
24	0.415822	0.475424	0.496007	0.632956	0.446119	0.477063	0.487974	0.588746	0.580135	0.705131	0.616113	0.457872	0.482475	0.53233	0.413326	0.359679	0.578572	0.468591	0.602763	0.457932	0.456747	0.473004	0.441068	0.338037	0.437175	0.348207	0.527052	0.557575	0.469285	0.545461	0.58516	0.619298	0.588837	0.688946	0.693002	0.373021	0.429041	0.453468	0.37156
25	0.388004	0.469131	0.501956	0.607037	0.408456	0.476709	0.465655	0.565913	0.58948	0.723944	0.60851	0.45522	0.475549	0.536288	0.395602	0.336422	0.553125	0.453764	0.604874	0.446275	0.441163	0.481956	0.418952	0.341714	0.399886	0.360701	0.493061	0.52784	0.480047	0.580578	0.569979	0.629264	0.560225	0.693977	0.693965	0.367629	0.43047	0.443055	0.383428
26	0.379659	0.46344	0.499656	0.605163	0.423507	0.462175	0.470599	0.54101	0.559525	0.746827	0.619979	0.456841	0.468586	0.533255	0.392325	0.323808	0.532263	0.431611	0.5993	0.451798	0.462208	0.457357	0.419295	0.36278	0.421215	0.341953	0.486487	0.539136	0.467192	0.574945	0.556076	0.613046	0.56019	0.666073	0.641905	0.312912	0.425826	0.500748	0.416964
27	0.38303	0.453894	0.475075	0.600362	0.397275	0.491351	0.443844	0.563714	0.572122	0.734442	0.619319	0.43767	0.45351	0.520519	0.401613	0.333612	0.568979	0.46634	0.585125	0.445955	0.438119	0.456038	0.370081	0.327345	0.438326	0.319431	0.473918	0.508839	0.447281	0.557556	0.562034	0.61705	0.543802	0.667834	0.584709	0.323214	0.403069	0.490969	0.371192
28	0.375678	0.418588	0.469144	0.597735	0.39232	0.474762	0.413278	0.52714	0.546466	0.698551	0.582122	0.45125	0.44388	0.507325	0.39257	0.326656	0.518498	0.455854	0.556999	0.461307	0.435426	0.453809	0.3419	0.379079	0.380763	0.310336	0.453193	0.489604	0.463891	0.554835	0.572968	0.629529	0.547426	0.654465	0.63975	0.34503	0.356264	0.487933	0.387561
29	0.351929	0.419691	0.447764	0.605375	0.407071	0.453399	0.424633	0.514265	0.516325	0.658864	0.587346	0.428191	0.450702	0.509584	0.370921	0.317797	0.503199	0.408816	0.57709	0.42929	0.43251	0.462684	0.351238	0.340176	0.396933	0.325588	0.454797	0.471995	0.456189	0.553975	0.538438	0.600875	0.524921	0.645617	0.576919	0.293369	0.429632	0.495019	0.342265
30	0.344924	0.412461	0.460262	0.602289	0.381053	0.444188	0.439613	0.528525	0.515472	0.701305	0.596931	0.406118	0.441842	0.495372	0.37296	0.319325	0.511173	0.390085	0.567171	0.424525	0.411602	0.447145	0.34761	0.27616	0.39732	0.316634	0.427531	0.461348	0.427205	0.55861	0.556534	0.597798	0.512848	0.622946	0.531133	0.356059	0.403227	0.475757	0.372548
31	0.336571	0.422653	0.436124	0.607815	0.390643	0.445023	0.417112	0.522384	0.520157	0.683645	0.560276	0.401907	0.444219	0.496068	0.392185	0.283616	0.490853	0.396087	0.570016	0.421496	0.427905	0.442598	0.381521	0.265268	0.361516	0.307257	0.434217	0.450618	0.436906	0.572167	0.488948	0.571334	0.510975	0.624495	0.510005	0.327697	0.364132	0.492809	0.336106
32	0.344271	0.40222	0.425214	0.600918	0.392869	0.444503	0.387484	0.505834	0.510182	0.727216	0.59039	0.408776	0.44329	0.495014	0.388399	0.278676	0.542275	0.426295	0.566584	0.437175	0.417596	0.444979	0.356707	0.252034	0.399121	0.300442	0.421465	0.435091	0.396584	0.555668	0.544474	0.594097	0.512897	0.629794	0.484749	0.318711	0.340774	0.453941	0.324542
33	0.313182	0.394677	0.442034	0.572136	0.367849	0.424618	0.407848	0.483146	0.53607	0.699971	0.577536	0.399248	0.426908	0.499071	0.387049	0.271658	0.542859	0.426244	0.568985	0.424211	0.399218	0.428325	0.316726	0.304815	0.379203	0.280708	0.417117	0.437198	0.390575	0.552808	0.561655	0.560114	0.497118	0.630648	0.480673	0.346978	0.379343	0.445921	0.321203
34	0.276175	0.403135	0.429507	0.564608	0.359261	0.415438	0.404512	0.475133	0.500116	0.6922	0.565338	0.37294	0.427966	0.489532	0.357234	0.269927	0.511665	0.395962	0.544266	0.420591	0.402808	0.409228	0.364554	0.307	0.304406	0.264824	0.397022	0.45811	0.41163	0.549046	0.525364	0.587697	0.499802	0.614824	0.511679	0.373399	0.35372	0.43241	0.301123
35	0.276074	0.410257	0.424042	0.573094	0.353861	0.396838	0.394556	0.489739	0.485304	0.712298	0.56121	0.400149	0.415601	0.475446	0.360457	0.279162	0.520595	0.417664	0.553211	0.424318	0.387098	0.392869	0.336307	0.292716	0.362454	0.272315	0.414832	0.417183	0.403936	0.521316	0.528076	0.574501	0.493789	0.629221	0.470214	0.352207	0.397058	0.456913	0.257243
36	0.286788	0.39366	0.42034	0.577245	0.348913	0.386334	0.393923	0.437423	0.473639	0.708146	0.54491	0.371455	0.407214	0.480596	0.365095	0.28004	0.495527	0.435802	0.552608	0.422704	0.375862	0.386276	0.336402	0.272451	0.400114	0.261244	0.402091	0.412319	0.411542	0.528603	0.49564	0.567856	0.482813	0.629538	0.4749	0.331344	0.336662	0.416734	0.272722
37	0.279139	0.38897	0.40218	0.571431	0.333391	0.360174	0.388056	0.462937	0.468651	0.723476	0.55748	0.382699	0.407835	0.470339	0.375965	0.293126	0.511672	0.427598	0.538285	0.414052	0.375674	0.381202	0.306699	0.250017	0.350879	0.28334	0.387004	0.400737	0.376986	0.513979	0.484663	0.577846	0.478691	0.630378	0.487971	0.320509	0.361744	0.495857	0.300125
38	0.285257	0.383798	0.399568	0.567961	0.348304	0.359886	0.348619	0.42189	0.470283	0.694013	0.560348	0.37471	0.415272	0.471364	0.344181	0.296051	0.491352	0.411695	0.539334	0.396737	0.362157	0.380551	0.339983	0.238293	0.324531	0.256017	0.391629	0.407332	0.355642	0.511755	0.468547	0.574619	0.492832	0.593646	0.470382	0.296674	0.261396	0.432546	0.277229
39	0.283528	0.369586	0.391081	0.567678	0.344285	0.353255	0.345512	0.413127	0.448935	0.680165	0.542996	0.357874	0.395111	0.46708	0.332883	0.29088	0.537325	0.411951	0.531723	0.397453	0.373595	0.384061	0.323435	0.284509	0.337187	0.240408	0.376927	0.420848	0.36809	0.503809	0.483066	0.58234	0.493244	0.599023	0.458944	0.267627	0.319766	0.435398	0.293512
40	0.318425	0.362918	0.405617	0.563381	0.331079	0.334457	0.355601	0.41661	0.477992	0.663423	0.544735	0.358578	0.390862	0.465287	0.325017	0.277763	0.492742	0.390665	0.553919	0.402892	0.382107	0.38609	0.300858	0.237104	0.341515	0.233662	0.339596	0.422159	0.35616	0.521595	0.442321	0.56477	0.456466	0.579578	0.428903	0.230753	0.330141	0.446707	0.243402
41	0.309334	0.373129	0.396407	0.552413	0.357072	0.332834	0.333184	0.416362	0.483383	0.649353	0.525101	0.339149	0.389904	0.463508	0.354927	0.28796	0.495155	0.360715	0.54715	0.396023	0.377941	0.378451	0.316177	0.220394	0.341765	0.241056	0.364188	0.388667	0.324933	0.50955	0.471687	0.57299	0.446131	0.594957	0.426679	0.212435	0.312693	0.432158	0.245353
42	0.311651	0.349923	0.391778	0.553544	0.329706	0.316754	0.339899	0.409458	0.461428	0.624848	0.524659	0.364911	0.386739	0.458117	0.338231	0.271131	0.467177	0.370852	0.537912	0.391332	0.383856	0.375645	0.30153	0.273318	0.329426	0.215772	0.362182	0.376715	0.334765	0.485528	0.465286	0.584047	0.449639	0.579753	0.410823	0.211125	0.272769	0.450486	0.222161
43	0.300778	0.352239	0.371071	0.525567	0.343976	0.31561	0.362254	0.427423	0.44612	0.654672	0.515084	0.352279	0.385987	0.45339	0.329576	0.284091	0.504043	0.380471	0.538884	0.390332	0.380513	0.385927	0.286554	0.270483	0.338995	0.201964	0.34834	0.37508	0.35878	0.493224	0.466303	0.542126	0.445636	0.578012	0.400134	0.278875	0.275962	0.435058	0.243936
44	0.277821	0.335635	0.371483	0.531289	0.324971	0.308551	0.375673	0.424526	0.427058	0.666343	0.53505	0.342335	0.386261	0.46211	0.32154	0.286484	0.482432	0.364958	0.528071	0.399203	0.351852	0.383778	0.300161	0.252453	0.369082	0.208258	0.33317	0.368842	0.338078	0.489181	0.459466	0.544713	0.447483	0.557247	0.385489	0.229911	0.260262	0.376304	0.216226
45	0.2712	0.343316	0.374765	0.532383	0.331125	0.306371	0.35609	0.388662	0.446956	0.634565	0.532704	0.331883	0.375775	0.448892	0.314614	0.25222	0.508382	0.375244	0.529163	0.37746	0.352673	0.378285	0.279754	0.226768	0.348644	0.201071	0.345445	0.380335	0.328831	0.479628	0.444985	0.518466	0.435926	0.578262	0.387711	0.256678	0.305462	0.360319	0.228142
46	0.286138	0.355063	0.361746	0.538021	0.331614	0.317157	0.361461	0.390098	0.426552	0.645581	0.540037	0.343366	0.370906	0.442111	0.309149	0.252881	0.48721	0.345659	0.537867	0.388554	0.34808	0.374051	0.291002	0.240949	0.336062	0.171792	0.326899	0.37671	0.352369	0.463394	0.42993	0.56083	0.445804	0.563605	0.401186	0.223002	0.241785	0.35468	0.146596
47	0.283956	0.33608	0.357836	0.54767	0.311763	0.301683	0.351001	0.413536	0.425511	0.667079	0.532088	0.325078	0.377577	0.431629	0.313101	0.245028	0.461973	0.339442	0.523455	0.376993	0.35008	0.378009	0.290325	0.265046	0.337059	0.147718	0.348696	0.393824	0.357355	0.511738	0.41998	0.517621	0.426076	0.576891	0.356008	0.244025	0.270917	0.361752	0.232425
48	0.290257	0.337082	0.360148	0.539354	0.32685	0.334831	0.340491	0.424437	0.450708	0.639045	0.508165	0.322947	0.364546	0.427747	0.334691	0.241896	0.478421	0.332308	0.539969	0.372253	0.352762	0.356135	0.283444	0.25561	0.286501	0.161471	0.323777	0.398287	0.321287	0.484506	0.470898	0.505213	0.424773	0.578824	0.379613	0.19764	0.280224	0.317013	0.198581
49	0.295745	0.320262	0.363887	0.538202	0.296203	0.305699	0.3144	0.376913	0.441415	0.631991	0.519811	0.349248	0.369708	0.414955	0.307613	0.23214	0.449535	0.344515	0.534491	0.383878	0.347639	0.364559	0.287591	0.28067	0.28742	0.176791	0.309588	0.389015	0.305682	0.473607	0.413746	0.507098	0.428883	0.578192	0.357376	0.215045	0.293804	0.414238	0.150535
50	0.285326	0.342366	0.356483	0.554	0.292316	0.327785	0.326527	0.387193	0.46261	0.661048	0.533045	0.325934	0.359782	0.430797	0.312258	0.251246	0.431421	0.338316	0.557624	0.368765	0.351469	0.338369	0.254764	0.257767	0.290627	0.182417	0.309199	0.377992	0.31339	0.478063	0.398564	0.468415	0.401843	0.552216	0.339066	0.212727	0.277404	0.353971	0.179295
51	0.274512	0.328657	0.358242	0.563329	0.313619	0.309734	0.300653	0.397972	0.441444	0.645574	0.518451	0.324439	0.366603	0.412889	0.307541	0.232759	0.467064	0.334218	0.527905	0.394319	0.366817	0.313443	0.261754	0.271471	0.265707	0.172175	0.314347	0.377316	0.327543	0.476327	0.41961	0.5177	0.400077	0.545691	0.319428	0.160622	0.262975	0.330906	0.125978
52	0.280012	0.315271	0.345355	0.568247	0.31248	0.29674	0.313096	0.387438	0.432969	0.605308	0.511224	0.302287	0.355704	0.405515	0.320549	0.260907	0.435597	0.336834	0.517315	0.367159	0.344638	0.326736	0.27445	0.222619	0.288852	0.16729	0.321558	0.34825	0.288144	0.4782	0.426364	0.499858	0.402573	0.566686	0.365503	0.203847	0.29487	0.340774	0.137574
53	0.281661	0.303787	0.335209	0.554486	0.294706	0.289636	0.311926	0.390728	0.421981	0.642284	0.517289	0.318894	0.350395	0.41403	0.310603	0.220457	0.421756	0.312024	0.542471	0.38176	0.348163	0.33934	0.273951	0.224158	0.308369	0.158693	0.313668	0.377661	0.271713	0.4062	0.401926	0.478051	0.399774	0.558055	0.398957	0.227822	0.285921	0.333937	0.138777
54	0.267309	0.314007	0.332941	0.543095	0.29596	0.293517	0.304985	0.357854	0.453784	0.640346	0.496023	0.320993	0.342772	0.414041	0.339947	0.233924	0.464773	0.347601	0.531973	0.377185	0.360878	0.31765	0.24842	0.271426	0.302418	0.153095	0.295145	0.341823	0.274738	0.398208	0.404351	0.474557	0.40684	0.530806	0.341588	0.196641	0.212798	0.344558	0.119042
55	0.247348	0.314747	0.323014	0.54099	0.291223	0.288197	0.317241	0.368586	0.414626	0.642252	0.487386	0.310361	0.337851	0.407324	0.325669	0.211902	0.439794	0.328072	0.5425	0.386194	0.347206	0.316823	0.24357	0.285259	0.259492	0.136199	0.273967	0.318242	0.300873	0.419831	0.418472	0.461029	0.375957	0.534903	0.329292	0.180293	0.221932	0.366143	0.134881
56	0.240915	0.304421	0.332993	0.551813	0.293793	0.267297	0.306468	0.373125	0.420931	0.63744	0.493094	0.291767	0.335663	0.408443	0.34508	0.227214	0.40252	0.307447	0.523388	0.365438	0.341532	0.339186	0.271871	0.246786	0.292179	0.172905	0.270972	0.348945	0.300582	0.41145	0.412251	0.502129	0.385827	0.508011	0.350388	0.240032	0.22314	0.438868	0.120397
57	0.246667	0.304257	0.329249	0.556812	0.290201	0.275246	0.295669	0.365436	0.408711	0.606118	0.488791	0.28762	0.339156	0.409739	0.348998	0.205924	0.411475	0.295998	0.53159	0.375812	0.344799	0.301359	0.263762	0.284788	0.255516	0.156537	0.278306	0.365293	0.284233	0.419611	0.361725	0.48104	0.390461	0.503432	0.338346	0.257222	0.207309	0.302339	0.172904
58	0.25379	0.303139	0.330784	0.549488	0.283425	0.27996	0.299748	0.366804	0.404373	0.610206	0.481096	0.269202	0.340119	0.402963	0.33135	0.19869	0.394979	0.288551	0.514895	0.360096	0.339568	0.309588	0.230671	0.230855	0.28598	0.150816	0.278381	0.33589	0.272471	0.431052	0.355781	0.467858	0.363928	0.497968	0.361963	0.234697	0.22512	0.413976	0.124883
59	0.255138	0.316575	0.333631	0.535241	0.276464	0.252637	0.283256	0.353658	0.403801	0.617362	0.485114	0.277076	0.336339	0.405334	0.323743	0.216995	0.395626	0.287913	0.524052	0.356271	0.335096	0.318018	0.246838	0.221385	0.251774	0.147304	0.285418	0.322537	0.268098	0.377539	0.389542	0.471488	0.402977	0.463077	0.350175	0.21901	0.213236	0.325365	0.107596
60	0.278856	0.288206	0.334994	0.541287	0.282961	0.272038	0.2901	0.344462	0.37959	0.632745	0.480541	0.255114	0.318962	0.384786	0.318867	0.184102	0.453081	0.276112	0.502363	0.348771	0.322209	0.31828	0.224453	0.235357	0.266707	0.120966	0.221739	0.339483	0.265035	0.380978	0.347863	0.429174	0.385643	0.453989	0.348818	0.166612	0.22443	0.420252	0.142399
61	0.259594	0.293979	0.327881	0.577096	0.274767	0.27655	0.299685	0.327496	0.404134	0.643995	0.463456	0.249297	0.329888	0.386494	0.304147	0.170734	0.384225	0.265847	0.489328	0.382051	0.323641	0.294407	0.243414	0.262366	0.253255	0.156799	0.267767	0.325916	0.233551	0.401409	0.340566	0.459504	0.380253	0.453683	0.39514	0.228199	0.220889	0.368934	0.151113
62	0.256619	0.298047	0.32226	0.535669	0.274672	0.242942	0.300364	0.318912	0.406027	0.64686	0.46645	0.256787	0.317638	0.390434	0.31051	0.152048	0.377327	0.290773	0.491288	0.374821	0.321996	0.302394	0.21945	0.233058	0.266312	0.13983	0.25898	0.316158	0.266614	0.399704	0.324138	0.43434	0.369926	0.455338	0.324216	0.223491	0.203661	0.405542	0.114457
63	0.260361	0.290213	0.334805	0.532165	0.236038	0.259799	0.316523	0.309791	0.370333	0.623525	0.471635	0.277372	0.329043	0.400883	0.317527	0.165644	0.389792	0.270764	0.493891	0.343594	0.323625	0.285182	0.257914	0.243326	0.289451	0.133205	0.26677	0.30152	0.231577	0.402633	0.322909	0.414796	0.355984	0.43308	0.364961	0.203036	0.238573	0.374716	0.149637
64	0.259552	0.272074	0.335693	0.516405	0.250849	0.252318	0.299264	0.307209	0.364018	0.626651	0.464299	0.2866	0.325364	0.384392	0.300954	0.174679	0.411655	0.284638	0.500808	0.351102	0.306167	0.294724	0.23853	0.241335	0.297374	0.130734	0.239925	0.32434	0.225292	0.401523	0.354232	0.452321	0.346704	0.429946	0.392171	0.183097	0.210865	0.311853	0.134746
65	0.238469	0.264917	0.319529	0.497299	0.259002	0.255046	0.289345	0.276297	0.356273	0.641606	0.445568	0.286971	0.313422	0.37924	0.320276	0.176712	0.406657	0.275699	0.498753	0.344727	0.316503	0.279038	0.232498	0.233706	0.252883	0.178988	0.243284	0.311111	0.263689	0.388409	0.354175	0.453428	0.359998	0.432627	0.384872	0.188975	0.235498	0.324623	0.137154
66	0.248425	0.287368	0.327129	0.513335	0.259901	0.244321	0.285915	0.297586	0.338578	0.607076	0.453313	0.26335	0.329285	0.388992	0.305555	0.157411	0.432255	0.303639	0.481683	0.354573	0.32973	0.283688	0.213042	0.238226	0.282284	0.165828	0.264383	0.293615	0.231107	0.411302	0.346771	0.413714	0.375833	0.414423	0.366815	0.171578	0.188069	0.3415	0.124569
67	0.251404	0.273829	0.326685	0.500969	0.256046	0.233933	0.307362	0.297807	0.348745	0.621643	0.460514	0.283129	0.316728	0.387172	0.318374	0.148257	0.395363	0.288136	0.472851	0.344768	0.299549	0.28571	0.224221	0.268422	0.253812	0.162596	0.242537	0.314943	0.237167	0.383854	0.345256	0.439347	0.362567	0.37255	0.371554	0.148993	0.221901	0.284581	0.0913779
68	0.257245	0.278998	0.32453	0.49287	0.247461	0.22303	0.31745	0.31677	0.34925	0.640944	0.443922	0.287294	0.307589	0.378088	0.310533	0.145166	0.408922	0.288268	0.472832	0.344288	0.307389	0.295898	0.199121	0.223253	0.258294	0.17653	0.237737	0.290468	0.251557	0.378596	0.336028	0.426933	0.362639	0.383453	0.370275	0.193589	0.245126	0.318412	0.116825
69	0.272517	0.295205	0.346559	0.529036	0.251064	0.234618	0.307459	0.307825	0.332135	0.585642	0.441962	0.269085	0.303243	0.373791	0.327527	0.129264	0.403143	0.291428	0.482035	0.359499	0.312138	0.285561	0.198586	0.205769	0.268235	0.167522	0.278948	0.307272	0.229937	0.366033	0.30453	0.434415	0.341536	0.372725	0.404944	0.199723	0.23697	0.250195	0.14104
70	0.268959	0.285053	0.326127	0.502908	0.231185	0.208421	0.306622	0.309723	0.360751	0.601189	0.444124	0.252658	0.310523	0.37531	0.290104	0.146087	0.415146	0.272216	0.507445	0.355467	0.301066	0.301702	0.188197	0.194652	0.26763	0.152861	0.223331	0.303025	0.242666	0.369418	0.315033	0.433798	0.337706	0.382653	0.369317	0.195067	0.229218	0.282157	0.0928825
71	0.255688	0.272962	0.323563	0.496313	0.241888	0.216741	0.320688	0.32637	0.371598	0.615004	0.431337	0.265053	0.302294	0.373703	0.304249	0.139202	0.36745	0.256333	0.494846	0.345569	0.304514	0.29082	0.188628	0.20185	0.240278	0.172012	0.2387	0.294829	0.232692	0.371216	0.340396	0.41699	0.322683	0.371148	0.336111	0.194875	0.233251	0.234624	0.118545
72	0.269727	0.262174	0.316257	0.512252	0.227025	0.198282	0.312958	0.277193	0.385969	0.638213	0.447154	0.265589	0.303758	0.369629	0.301482	0.177663	0.397717	0.270237	0.497438	0.359314	0.295464	0.283836	0.187233	0.185797	0.266527	0.163696	0.238171	0.28903	0.230594	0.361288	0.288651	0.41509	0.327233	0.385913	0.321973	0.153924	0.207299	0.340107	0.111232
73	0.246091	0.270208	0.306816	0.500435	0.243589	0.205455	0.312263	0.297381	0.371517	0.588288	0.431609	0.268432	0.300345	0.359502	0.291006	0.151717	0.409218	0.272732	0.496423	0.340798	0.296597	0.273303	0.172467	0.17785	0.282737	0.17668	0.218278	0.322582	0.229496	0.368499	0.308569	0.41356	0.335047	0.358011	0.341209	0.183548	0.19595	0.329634	0.140597
74	0.232079	0.27545	0.303515	0.48532	0.220169	0.181174	0.299986	0.294328	0.38245	0.597854	0.427794	0.244169	0.307676	0.357253	0.298398	0.17065	0.357594	0.254119	0.469178	0.34895	0.302812	0.275863	0.193547	0.188748	0.280316	0.155062	0.194697	0.288908	0.223763	0.347898	0.306529	0.391628	0.325496	0.358326	0.331222	0.179018	0.216876	0.287423	0.182669
75	0.211458	0.264795	0.28393	0.491723	0.255464	0.189288	0.296478	0.331397	0.365472	0.602147	0.425828	0.262613	0.296559	0.357898	0.293343	0.15964	0.350863	0.271507	0.479516	0.340876	0.277189	0.274527	0.165277	0.180512	0.274553	0.174206	0.185521	0.263808	0.227658	0.32981	0.303244	0.408648	0.309267	0.364403	0.35374	0.175505	0.212525	0.266982	0.144807
76	0.232483	0.279053	0.293717	0.487392	0.223114	0.181243	0.317826	0.313633	0.403685	0.587132	0.411448	0.273586	0.293621	0.353821	0.306473	0.176179	0.364905	0.303589	0.458203	0.328054	0.27044	0.290846	0.187654	0.170202	0.250303	0.15943	0.201808	0.308464	0.199364	0.32386	0.308929	0.396868	0.327254	0.373096	0.363669	0.141708	0.196453	0.278479	0.113181
77	0.203788	0.272242	0.305804	0.491759	0.230027	0.181653	0.316441	0.333727	0.370177	0.59977	0.412396	0.257378	0.287327	0.357984	0.298143	0.168713	0.361651	0.277636	0.472048	0.339636	0.286782	0.275811	0.196692	0.222727	0.267898	0.171491	0.18165	0.299214	0.199465	0.330914	0.309784	0.419882	0.297664	0.368955	0.356736	0.173408	0.212108	0.291286	0.125457
78	0.216573	0.263899	0.30677	0.472718	0.232512	0.174601	0.316367	0.321497	0.375009	0.591975	0.405654	0.269073	0.291878	0.36401	0.308668	0.161545	0.371558	0.300062	0.47619	0.344348	0.27864	0.264701	0.18125	0.203471	0.236614	0.166145	0.159518	0.270945	0.192558	0.311158	0.314702	0.39751	0.299132	0.386905	0.371783	0.168637	0.165069	0.313664	0.10417
79	0.224235	0.265784	0.300758	0.488278	0.235094	0.163567	0.30095	0.309763	0.368376	0.591451	0.405004	0.254304	0.293505	0.369375	0.302146	0.180078	0.371143	0.279631	0.482916	0.352177	0.284624	0.279012	0.165588	0.214912	0.203989	0.166129	0.177171	0.276698	0.212685	0.321683	0.306975	0.38381	0.304568	0.37101	0.328797	0.150969	0.191758	0.288414	0.12469
80	0.211674	0.256484	0.308843	0.481067	0.221085	0.162	0.308071	0.298137	0.327656	0.564164	0.407889	0.233925	0.284919	0.357729	0.305902	0.184702	0.369571	0.30917	0.478311	0.338917	0.292969	0.266902	0.192083	0.206695	0.206794	0.186245	0.167878	0.26281	0.215964	0.330966	0.275399	0.395326	0.304482	0.350081	0.342607	0.180042	0.168802	0.311667	0.0768304
81	0.22761	0.257949	0.303629	0.476649	0.236398	0.170191	0.301607	0.313852	0.335398	0.57363	0.42028	0.279794	0.272929	0.358387	0.289996	0.187677	0.363279	0.281141	0.465667	0.342719	0.276576	0.277308	0.172681	0.172858	0.238136	0.15603	0.19631	0.266262	0.205656	0.316321	0.295941	0.408689	0.299586	0.351698	0.351944	0.176265	0.179681	0.293113	0.0889509
82	0.240614	0.262513	0.299411	0.476739	0.220262	0.17403	0.273382	0.307674	0.340466	0.598536	0.421189	0.252318	0.264249	0.36095	0.293786	0.17665	0.32537	0.295303	0.465426	0.318037	0.284877	0.272567	0.189748	0.196776	0.257672	0.182874	0.154159	0.239849	0.176794	0.340793	0.299086	0.426408	0.30863	0.373473	0.298143	0.192631	0.18018	0.319833	0.0841409
83	0.237404	0.255173	0.296543	0.474512	0.207442	0.163771	0.301948	0.30269	0.354045	0.578983	0.412052	0.253815	0.275593	0.356826	0.278266	0.167031	0.35888	0.268419	0.470969	0.347916	0.291997	0.280919	0.182058	0.223872	0.237174	0.140789	0.176875	0.255482	0.19027	0.283334	0.298224	0.394687	0.293721	0.329934	0.285041	0.13757	0.184725	0.27901	0.0598423
84	0.21461	0.24802	0.292294	0.465955	0.199439	0.158964	0.284087	0.305951	0.354346	0.545102	0.424583	0.231731	0.262532	0.35103	0.263408	0.186714	0.399664	0.270976	0.466768	0.336383	0.28568	0.280404	0.185152	0.160264	0.18995	0.161718	0.171326	0.253641	0.19509	0.305914	0.270692	0.406295	0.273551	0.343389	0.265701	0.161472	0.186241	0.278926	0.0637999
85	0.224327	0.258942	0.27947	0.462227	0.198581	0.16775	0.291642	0.291634	0.32066	0.565047	0.423129	0.237027	0.267762	0.357655	0.249644	0.179774	0.36008	0.287596	0.460881	0.337292	0.287335	0.268967	0.161041	0.187955	0.223928	0.17559	0.176457	0.245568	0.227456	0.312374	0.320452	0.369651	0.271798	0.325205	0.318809	0.169045	0.139802	0.212058	0.0737333
86	0.216198	0.239782	0.289141	0.490185	0.213363	0.166797	0.283475	0.298467	0.357801	0.559514	0.417227	0.245789	0.269992	0.355052	0.271464	0.173167	0.363933	0.272569	0.445012	0.342167	0.2939	0.273733	0.177149	0.225558	0.234921	0.144697	0.179608	0.247684	0.211287	0.308787	0.30094	0.386275	0.285684	0.398758	0.311995	0.138502	0.144991	0.267559	0.125399
87	0.217858	0.24375	0.265973	0.482705	0.19985	0.140607	0.292622	0.285603	0.339343	0.546056	0.433155	0.217175	0.27293	0.36052	0.26803	0.161206	0.39112	0.272345	0.461739	0.347525	0.279282	0.277437	0.18002	0.176222	0.238169	0.0957193	0.149817	0.230509	0.181628	0.310152	0.292749	0.391295	0.244679	0.361748	0.238371	0.165264	0.132228	0.245118	0.0974935
88	0.228932	0.235039	0.249859	0.469049	0.20564	0.136187	0.310214	0.300166	0.319914	0.582595	0.42722	0.25886	0.268458	0.356349	0.295503	0.146815	0.367464	0.288425	0.474953	0.32922	0.297851	0.269306	0.1901	0.199977	0.259764	0.137232	0.157184	0.280171	0.180326	0.307482	0.29526	0.348019	0.268894	0.41006	0.319473	0.158164	0.164119	0.284273	0.0870162
89	0.204018	0.229981	0.26851	0.452583	0.190744	0.168763	0.307936	0.301913	0.336854	0.581558	0.404514	0.231716	0.262826	0.351481	0.272684	0.175882	0.329108	0.282511	0.440322	0.352603	0.273005	0.260368	0.200703	0.191348	0.311088	0.139416	0.143566	0.221045	0.189774	0.308228	0.240131	0.350974	0.260823	0.383598	0.302377	0.151054	0.107649	0.32894	0.0740618
90	0.225736	0.237837	0.266301	0.476315	0.198715	0.14763	0.316336	0.287712	0.341214	0.534018	0.378005	0.244621	0.265127	0.347649	0.265586	0.149884	0.319251	0.247718	0.46297	0.370299	0.274829	0.260496	0.174458	0.204838	0.245523	0.131105	0.147871	0.224232	0.195457	0.310789	0.286297	0.3696	0.278698	0.379931	0.28739	0.172078	0.154326	0.368092	0.0947691
91	0.195552	0.222157	0.260408	0.455144	0.186588	0.154717	0.306894	0.310973	0.337304	0.547295	0.389469	0.232963	0.277578	0.351206	0.252037	0.150151	0.355895	0.264726	0.448289	0.352883	0.2515	0.249654	0.225335	0.178766	0.263161	0.131006	0.156955	0.234434	0.196493	0.302196	0.3254	0.352453	0.268146	0.387805	0.255871	0.163975	0.150632	0.343541	0.0988974
92	0.205462	0.223346	0.275561	0.478156	0.186719	0.169289	0.298218	0.306778	0.342599	0.551327	0.386027	0.263304	0.266718	0.3478	0.252213	0.156992	0.357308	0.26435	0.452243	0.363021	0.274501	0.258039	0.175886	0.207282	0.25745	0.12198	0.155015	0.286339	0.2279	0.298287	0.291346	0.320693	0.268318	0.359035	0.233167	0.152446	0.160164	0.288426	0.10634
93	0.207418	0.215908	0.267427	0.473914	0.16297	0.163524	0.311183	0.281114	0.330528	0.542701	0.401058	0.242605	0.263949	0.346888	0.252714	0.142847	0.342251	0.251924	0.442907	0.352538	0.281471	0.247867	0.210385	0.215512	0.272212	0.0984248	0.168328	0.272716	0.184727	0.299873	0.321141	0.354807	0.269061	0.372696	0.276534	0.134818	0.178032	0.294238	0.0889219
94	0.208111	0.226961	0.285075	0.467025	0.199154	0.158119	0.321587	0.308184	0.308782	0.497961	0.375298	0.246395	0.251387	0.342473	0.25311	0.154453	0.372219	0.241795	0.462276	0.358706	0.273921	0.247352	0.177285	0.178196	0.254474	0.113352	0.15154	0.257673	0.174766	0.273117	0.274988	0.354862	0.273373	0.349641	0.251584	0.147588	0.137464	0.335438	0.106328
95	0.204522	0.222678	0.26322	0.4816	0.193948	0.168295	0.327008	0.297497	0.289499	0.534229	0.383521	0.232296	0.262382	0.346572	0.251242	0.149376	0.371883	0.255914	0.447743	0.348083	0.256426	0.259051	0.188812	0.172025	0.262404	0.0770499	0.138321	0.251586	0.206813	0.308374	0.299135	0.380963	0.280965	0.363311	0.243831	0.151983	0.145173	0.32056	0.0844777
96	0.214496	0.221998	0.262679	0.469825	0.174891	0.169975	0.326542	0.306425	0.276606	0.506089	0.377442	0.21649	0.261045	0.338818	0.266804	0.159062	0.332851	0.237711	0.450452	0.348414	0.24824	0.243031	0.207877	0.154928	0.238925	0.131757	0.151682	0.255208	0.234202	0.265685	0.240464	0.328211	0.263558	0.380858	0.267932	0.115118	0.153887	0.337354	0.102878
97	0.21593	0.220574	0.278537	0.458757	0.192783	0.153358	0.323398	0.290084	0.278289	0.535466	0.403707	0.218831	0.262425	0.350576	0.266121	0.153272	0.332178	0.256536	0.438587	0.34392	0.261256	0.246172	0.164978	0.173424	0.272551	0.0808921	0.151381	0.26785	0.223151	0.282792	0.270268	0.319943	0.267852	0.351172	0.231018	0.118032	0.142572	0.366476	0.129842
98	0.226578	0.211704	0.275564	0.460794	0.202628	0.159633	0.322561	0.298306	0.269481	0.501481	0.434889	0.23983	0.254526	0.337632	0.282325	0.173069	0.335376	0.254231	0.452844	0.344999	0.274004	0.247087	0.200188	0.174978	0.300193	0.138083	0.151902	0.239102	0.215079	0.259965	0.268629	0.341422	0.253556	0.349184	0.238698	0.0850394	0.145453	0.286562	0.0924658
99	0.232942	0.213523	0.285545	0.457313	0.213214	0.169832	0.325206	0.283749	0.291663	0.509454	0.407995	0.212583	0.26192	0.333672	0.266068	0.140876	0.31129	0.254951	0.44953	0.349541	0.258813	0.239109	0.180628	0.140083	0.266165	0.119047	0.131396	0.249701	0.168109	0.288369	0.247992	0.384611	0.266886	0.374838	0.27162	0.154793	0.118391	0.326387	0.0731262
100	0.229624	0.227596	0.283987	0.468818	0.196808	0.167909	0.324059	0.268146	0.301267	0.553999	0.410917	0.21232	0.2484	0.323539	0.274088	0.151088	0.321588	0.245647	0.433426	0.324954	0.244127	0.251396	0.186764	0.179103	0.274108	0.115095	0.185691	0.250731	0.204264	0.230974	0.250731	0.321371	0.240844	0.343123	0.237877	0.149521	0.106591	0.283511	0.114384
101	0.254023	0.236106	0.285493	0.469304	0.206235	0.160345	0.355027	0.244429	0.291301	0.538678	0.424973	0.209927	0.248458	0.339018	0.291557	0.142422	0.321703	0.244119	0.433858	0.347426	0.233795	0.235549	0.170576	0.195573	0.268612	0.121062	0.141509	0.25584	0.202837	0.254687	0.248186	0.329545	0.259711	0.378628	0.287277	0.189476	0.122157	0.278098	0.101715
102	0.262192	0.227719	0.279765	0.463845	0.210025	0.172327	0.324531	0.276961	0.295865	0.529826	0.395786	0.213351	0.251937	0.318632	0.281626	0.145039	0.289512	0.246698	0.43206	0.328913	0.22715	0.241705	0.1425	0.141868	0.263624	0.135048	0.16808	0.259855	0.156544	0.249986	0.228009	0.282017	0.24148	0.369324	0.222761	0.116261	0.146556	0.317724	0.121964
103	0.251039	0.223766	0.297327	0.472275	0.19228	0.162033	0.312214	0.310422	0.303621	0.519486	0.406512	0.215369	0.240513	0.327488	0.265751	0.158722	0.306434	0.262621	0.417589	0.340825	0.22946	0.227915	0.192946	0.174631	0.269252	0.134473	0.175908	0.280246	0.213135	0.246461	0.237716	0.317051	0.219524	0.371275	0.205507	0.192962	0.1211	0.302401	0.121932
104	0.250475	0.230856	0.288949	0.468725	0.185576	0.164579	0.338151	0.291063	0.302737	0.534165	0.396255	0.199392	0.250964	0.332883	0.275508	0.168212	0.278258	0.266257	0.435678	0.32172	0.227056	0.19688	0.166132	0.151936	0.254516	0.125164	0.16137	0.237385	0.165425	0.242589	0.271633	0.304414	0.237494	0.370369	0.202485	0.15049	0.109705	0.297376	0.098369
105	0.231925	0.226439	0.296786	0.467677	0.198692	0.147639	0.318316	0.284226	0.315848	0.525033	0.370537	0.225295	0.247043	0.331319	0.287604	0.165982	0.276805	0.259618	0.412214	0.327202	0.220844	0.19708	0.151759	0.0969805	0.224708	0.138965	0.129212	0.242257	0.15882	0.276849	0.262237	0.287649	0.246907	0.354132	0.220642	0.141598	0.119355	0.303253	0.187857
106	0.225469	0.243329	0.274834	0.483332	0.20279	0.162908	0.327374	0.272574	0.315168	0.504207	0.384646	0.20009	0.253831	0.316791	0.284868	0.165916	0.276548	0.251206	0.4277	0.341157	0.219466	0.198826	0.184262	0.148091	0.1955	0.116166	0.140239	0.23128	0.158605	0.232504	0.243576	0.296925	0.249495	0.332475	0.193237	0.0782847	0.15525	0.279292	0.141333
107	0.2449	0.225382	0.28731	0.46605	0.201884	0.136821	0.328398	0.277416	0.286308	0.532725	0.405167	0.21504	0.24814	0.327508	0.283807	0.163608	0.295783	0.248802	0.43778	0.314828	0.219435	0.198042	0.163529	0.141925	0.255699	0.145776	0.180946	0.259857	0.111974	0.255977	0.207115	0.305258	0.246851	0.337914	0.203519	0.098407	0.129257	0.236214	0.137066
108	0.241871	0.222284	0.262307	0.468223	0.181337	0.168323	0.302279	0.248348	0.262591	0.482187	0.370842	0.214893	0.254113	0.332118	0.270528	0.163881	0.284153	0.241935	0.42798	0.328929	0.227623	0.211322	0.154671	0.154003	0.243274	0.133799	0.139899	0.241871	0.147168	0.229648	0.228276	0.272511	0.23527	0.324497	0.180289	0.123287	0.124271	0.255922	0.0951409
109	0.224628	0.232139	0.284459	0.472672	0.193619	0.145679	0.296774	0.286502	0.282492	0.492733	0.392958	0.217753	0.241313	0.320109	0.270337	0.166139	0.31675	0.246173	0.424667	0.335585	0.233108	0.214526	0.183328	0.198574	0.260562	0.138897	0.091633	0.254165	0.139335	0.240438	0.247138	0.294055	0.228172	0.328226	0.234204	0.0983542	0.139329	0.271152	0.145354
110	0.217763	0.231107	0.267735	0.457169	0.21147	0.16421	0.318443	0.290457	0.277391	0.514667	0.400114	0.21636	0.236205	0.313869	0.250783	0.145406	0.298222	0.245706	0.430999	0.311279	0.255071	0.21735	0.165931	0.188118	0.204205	0.107363	0.122965	0.262747	0.140529	0.240249	0.19409	0.288992	0.24443	0.3099	0.186513	0.0900258	0.133332	0.286208	0.133198
111	0.232398	0.217232	0.268178	0.448198	0.190768	0.162024	0.306269	0.284723	0.261705	0.552048	0.377884	0.222564	0.233992	0.312227	0.281736	0.159375	0.295712	0.242223	0.411885	0.3143	0.239339	0.197211	0.14719	0.145138	0.183326	0.118982	0.0822616	0.231043	0.12585	0.237265	0.220578	0.297859	0.230934	0.32058	0.205689	0.107674	0.121441	0.248622	0.0937389
112	0.222086	0.204793	0.246526	0.453232	0.20432	0.137586	0.297656	0.28622	0.255035	0.534111	0.374421	0.193839	0.253131	0.334258	0.262081	0.161756	0.28775	0.249586	0.408291	0.335242	0.235665	0.206794	0.133791	0.126972	0.182635	0.129287	0.103874	0.251096	0.145173	0.229207	0.226301	0.272274	0.229164	0.31441	0.171163	0.0782771	0.0882196	0.229084	0.129867
113	0.210015	0.221011	0.257574	0.443412	0.194729	0.109811	0.274504	0.294737	0.271059	0.569114	0.386923	0.21378	0.242468	0.326578	0.269869	0.139496	0.276636	0.248392	0.418548	0.312512	0.229884	0.212761	0.120754	0.15715	0.172252	0.106793	0.108481	0.243795	0.105134	0.231169	0.180819	0.296651	0.221027	0.331311	0.169728	0.143454	0.110698	0.250569	0.117649
114	0.200109	0.230128	0.266344	0.43431	0.194963	0.119786	0.271088	0.29625	0.252718	0.593681	0.388912	0.218432	0.253472	0.329004	0.303293	0.161859	0.322371	0.234364	0.428518	0.303941	0.205933	0.209116	0.114377	0.154639	0.190976	0.118706	0.107624	0.256931	0.18226	0.226589	0.224864	0.27271	0.227152	0.304622	0.183322	0.0785362	0.108549	0.208201	0.0952389
115	0.209877	0.224378	0.283924	0.448675	0.205477	0.113574	0.288924	0.280231	0.25115	0.553343	0.38865	0.190444	0.235762	0.327793	0.279934	0.153634	0.308002	0.22632	0.418502	0.309618	0.221777	0.210018	0.137338	0.160394	0.252106	0.127235	0.115434	0.274607	0.138894	0.239623	0.256311	0.28405	0.214208	0.295439	0.153455	0.132087	0.105966	0.240324	0.110996
116	0.207807	0.21509	0.260703	0.431073	0.192983	0.112651	0.301406	0.309899	0.264173	0.54116	0.368731	0.194867	0.238408	0.331014	0.28431	0.165355	0.301411	0.224115	0.410077	0.294746	0.214783	0.188775	0.151105	0.18321	0.236645	0.119733	0.110855	0.245944	0.138582	0.222557	0.203848	0.307391	0.208149	0.302284	0.157612	0.108583	0.128601	0.221705	0.108235
117	0.193375	0.208486	0.275723	0.452758	0.1921	0.108842	0.289213	0.278719	0.240804	0.528527	0.390377	0.21074	0.228197	0.314046	0.281105	0.161054	0.279131	0.222806	0.405934	0.284368	0.225396	0.212143	0.162453	0.172864	0.241198	0.134263	0.101952	0.252846	0.109308	0.221699	0.232125	0.330273	0.212041	0.312354	0.153355	0.149153	0.139763	0.221958	0.0800819
118	0.192751	0.225247	0.26779	0.455995	0.206053	0.11403	0.286694	0.288132	0.2426	0.546665	0.402279	0.201652	0.229606	0.318653	0.306208	0.172759	0.313656	0.228611	0.417807	0.293187	0.241594	0.195688	0.159053	0.184095	0.250452	0.119975	0.0962454	0.244862	0.163318	0.249253	0.217619	0.298948	0.210641	0.331566	0.177168	0.0944619	0.133978	0.258591	0.109117
119	0.193796	0.205302	0.242623	0.436451	0.202607	0.110154	0.292409	0.300081	0.253304	0.562592	0.384215	0.183257	0.238553	0.320813	0.275947	0.164256	0.291679	0.249454	0.407623	0.295877	0.23627	0.190541	0.156545	0.169825	0.242539	0.0800358	0.092656	0.253782	0.114077	0.221787	0.205327	0.311848	0.220472	0.320969	0.137349	0.152226	0.119452	0.242792	0.121323
120	0.189348	0.193061	0.261088	0.433652	0.206624	0.111975	0.280353	0.272181	0.275348	0.583905	0.376458	0.218501	0.230499	0.326313	0.280465	0.156102	0.304592	0.21957	0.41021	0.29518	0.233383	0.190375	0.161937	0.169002	0.213634	0.108297	0.13719	0.269741	0.148588	0.262663	0.246824	0.290667	0.201929	0.286983	0.156782	0.111694	0.103621	0.196281	0.0809139
121	0.197483	0.186615	0.2651	0.450854	0.206914	0.11412	0.281332	0.27944	0.245222	0.581876	0.401051	0.193573	0.227219	0.323844	0.27551	0.163895	0.294572	0.241455	0.398065	0.280136	0.253133	0.18731	0.162896	0.186823	0.240464	0.10511	0.0851658	0.226433	0.14179	0.217651	0.222083	0.299709	0.215907	0.276626	0.155926	0.115759	0.0529089	0.188723	0.111637
122	0.21074	0.172099	0.263392	0.466796	0.200336	0.108124	0.296474	0.31898	0.307821	0.558013	0.396858	0.198489	0.237079	0.314176	0.267962	0.169943	0.29387	0.239763	0.42219	0.277126	0.238245	0.17738	0.143225	0.179942	0.239824	0.0999742	0.10851	0.221098	0.145098	0.245078	0.211865	0.294201	0.193728	0.283438	0.160593	0.120328	0.0920306	0.201052	0.0873198
123	0.201471	0.176644	0.246685	0.459426	0.197619	0.110465	0.315517	0.290955	0.269866	0.557015	0.39413	0.206024	0.234841	0.314728	0.269105	0.186874	0.273846	0.266136	0.42206	0.283482	0.22487	0.170588	0.149391	0.181132	0.263664	0.0908738	0.105876	0.235031	0.170173	0.263535	0.214242	0.283266	0.20338	0.315941	0.187934	0.0918316	0.0790812	0.201556	0.108644
124	0.194737	0.165378	0.230557	0.450083	0.222412	0.111331	0.317647	0.323221	0.26466	0.551378	0.382849	0.216546	0.226928	0.312147	0.271322	0.182797	0.298592	0.216636	0.411121	0.283362	0.221128	0.172831	0.15635	0.185579	0.264181	0.0949122	0.0918568	0.204056	0.146774	0.23428	0.222106	0.329655	0.206103	0.297876	0.19063	0.0978752	0.0852312	0.217821	0.0748194
125	0.21361	0.184216	0.223816	0.445424	0.197115	0.108633	0.307295	0.284282	0.268732	0.535961	0.369545	0.200105	0.226795	0.309619	0.287785	0.164425	0.293269	0.215503	0.39787	0.268914	0.222296	0.173529	0.126388	0.179832	0.217217	0.0976697	0.0780303	0.207856	0.141349	0.269609	0.242145	0.317469	0.207602	0.308806	0.155057	0.0587359	0.0992451	0.249726	0.0808085
126	0.214675	0.166834	0.226315	0.46028	0.190588	0.115983	0.328864	0.277855	0.273603	0.578602	0.367279	0.204105	0.224555	0.306249	0.273126	0.171021	0.292473	0.242123	0.398323	0.294028	0.21773	0.161057	0.151174	0.18991	0.259496	0.117778	0.0824066	0.198533	0.18879	0.275938	0.218912	0.305541	0.1997	0.281778	0.121026	0.0942348	0.0920147	0.144296	0.154712
127	0.219218	0.182401	0.239968	0.440629	0.192163	0.122753	0.286907	0.295732	0.254239	0.544394	0.351854	0.180075	0.222739	0.298271	0.266057	0.158734	0.305465	0.238939	0.400421	0.278132	0.21346	0.169762	0.152261	0.143204	0.186742	0.116272	0.119264	0.262357	0.150151	0.267914	0.194074	0.239075	0.180765	0.305176	0.0922109	0.0995169	0.135548	0.228366	0.0585823
128	0.203358	0.185418	0.228123	0.432885	0.192029	0.129331	0.283521	0.303798	0.240007	0.53007	0.347626	0.164377	0.225691	0.29826	0.26212	0.159062	0.311784	0.248588	0.397141	0.277434	0.233049	0.167445	0.159463	0.163986	0.222399	0.0823334	0.0799347	0.24757	0.197738	0.285172	0.205714	0.293612	0.18084	0.289707	0.103244	0.104994	0.0875571	0.213285	0.113263
129	0.195181	0.176242	0.23306	0.447313	0.194642	0.125599	0.272762	0.2816	0.238855	0.561549	0.349944	0.18879	0.221419	0.299792	0.256291	0.209623	0.269595	0.241877	0.408148	0.283287	0.210389	0.147695	0.150526	0.148354	0.229181	0.0864895	0.102578	0.225357	0.141194	0.279956	0.192113	0.307233	0.17652	0.302603	0.0912462	0.0867105	0.0602239	0.204041	0.0666579
130	0.195349	0.167848	0.215476	0.447235	0.199681	0.137643	0.25671	0.285446	0.228883	0.534108	0.351601	0.189571	0.212197	0.302704	0.272748	0.204007	0.301013	0.215668	0.41504	0.287975	0.221468	0.159435	0.16067	0.167573	0.243667	0.0974833	0.0731841	0.206298	0.16546	0.265196	0.23291	0.287662	0.190935	0.285623	0.107437	0.102507	0.0929291	0.230093	0.0417864
131	0.191379	0.156841	0.218381	0.442959	0.206655	0.111415	0.245122	0.311888	0.210727	0.562165	0.348824	0.190977	0.231576	0.287326	0.274861	0.18728	0.332844	0.249422	0.419269	0.282151	0.223351	0.149916	0.156736	0.153613	0.167275	0.0764214	0.0901328	0.223934	0.16877	0.276279	0.18489	0.269033	0.169058	0.295325	0.0874012	0.100207	0.0974047	0.232153	0.0536189
132	0.170768	0.177748	0.235902	0.442489	0.19698	0.138615	0.259374	0.285805	0.239787	0.590044	0.346722	0.198612	0.214483	0.290042	0.26339	0.191113	0.293495	0.233017	0.414247	0.290848	0.20683	0.162586	0.162211	0.179496	0.22717	0.0821643	0.0814535	0.205216	0.183042	0.296407	0.257964	0.288468	0.20247	0.313095	0.156489	0.0725422	0.113002	0.201257	0.0996476
133	0.191551	0.17828	0.224972	0.453374	0.189433	0.120832	0.256164	0.297142	0.240065	0.559073	0.341452	0.199194	0.215399	0.28818	0.231724	0.204789	0.289692	0.2229	0.394885	0.281178	0.208827	0.150875	0.157374	0.171595	0.248673	0.0680189	0.088219	0.22282	0.163755	0.283394	0.177233	0.34241	0.165228	0.318645	0.171219	0.0955918	0.130695	0.162221	0.0809339
134	0.195765	0.167005	0.217953	0.441388	0.17351	0.125753	0.245056	0.283936	0.239814	0.568563	0.343092	0.20384	0.223639	0.289742	0.248109	0.20092	0.258908	0.235348	0.385746	0.275942	0.224983	0.138363	0.131986	0.15305	0.245238	0.0682551	0.0958942	0.22881	0.153306	0.247855	0.199413	0.291637	0.18128	0.292763	0.144953	0.054081	0.0948659	0.209426	0.0998499
135	0.211327	0.163616	0.21092	0.43388	0.194357	0.153986	0.245719	0.276311	0.232321	0.562257	0.341135	0.181255	0.214944	0.288991	0.237897	0.160094	0.280878	0.220731	0.39846	0.285073	0.218208	0.138543	0.113096	0.15503	0.205036	0.0576933	0.0759151	0.197702	0.17205	0.259621	0.193716	0.31582	0.178957	0.317959	0.124535	0.0714135	0.127884	0.217098	0.0207413
136	0.197497	0.151196	0.185345	0.431881	0.184047	0.12737	0.229286	0.282985	0.261931	0.553611	0.340162	0.181996	0.227568	0.286953	0.245313	0.171992	0.283987	0.209293	0.38937	0.311576	0.221353	0.139605	0.131287	0.140937	0.243638	0.0817975	0.0834557	0.206245	0.142958	0.231512	0.196844	0.285527	0.170629	0.290912	0.134252	0.0298592	0.108182	0.255174	0.0670772
137	0.201426	0.154746	0.222804	0.418938	0.199877	0.154881	0.221906	0.252097	0.230257	0.560486	0.320673	0.189599	0.225026	0.288404	0.222983	0.156786	0.330993	0.234824	0.397966	0.291818	0.217425	0.137825	0.151548	0.169236	0.234222	0.110514	0.0879505	0.218988	0.154976	0.237799	0.175433	0.244928	0.176691	0.289673	0.197712	0.0895289	0.0553875	0.216331	0.066977
138	0.21621	0.165985	0.207829	0.420971	0.191708	0.15701	0.238325	0.26167	0.225577	0.543749	0.310309	0.227008	0.211063	0.275477	0.23548	0.160009	0.278064	0.198702	0.395074	0.29573	0.218767	0.134649	0.141424	0.18424	0.221284	0.0982289	0.0770787	0.19615	0.159957	0.23797	0.166495	0.302592	0.182731	0.288569	0.180111	0.10366	0.102028	0.268647	0.0255929
139	0.224819	0.176358	0.189736	0.443848	0.19808	0.161727	0.245847	0.285022	0.252545	0.513186	0.322476	0.176503	0.224455	0.282307	0.244883	0.181804	0.330705	0.204179	0.405273	0.316875	0.21812	0.124527	0.135125	0.16112	0.291361	0.0551677	0.0972515	0.199529	0.157183	0.250053	0.163459	0.235962	0.182076	0.261938	0.171212	0.0742671	0.126262	0.230273	0.0367598
140	0.216107	0.175899	0.195614	0.445259	0.201452	0.162737	0.268187	0.29008	0.239739	0.551089	0.331711	0.209697	0.226957	0.275068	0.226875	0.169663	0.293329	0.223711	0.39641	0.29402	0.212626	0.118383	0.141883	0.162546	0.321394	0.105751	0.0831573	0.215891	0.140913	0.244578	0.185056	0.25156	0.18716	0.291104	0.160736	0.105965	0.0895663	0.189169	0.0526087
141	0.197598	0.161564	0.202228	0.432162	0.19766	0.16417	0.281612	0.255835	0.254676	0.533564	0.328634	0.173891	0.216031	0.28119	0.235507	0.176239	0.332676	0.223183	0.421156	0.311492	0.213827	0.101547	0.128335	0.127444	0.274726	0.0960009	0.108287	0.240454	0.151852	0.250138	0.164681	0.258615	0.177936	0.289454	0.169177	0.081919	0.0973347	0.246928	0.0703399
142	0.195382	0.170155	0.207989	0.444004	0.181407	0.185851	0.266114	0.25179	0.23252	0.55584	0.353052	0.167707	0.222063	0.286584	0.27501	0.190143	0.2747	0.21169	0.416963	0.310612	0.227112	0.113025	0.136226	0.118114	0.244892	0.063526	0.0802532	0.233761	0.130107	0.248822	0.168076	0.294712	0.198629	0.294473	0.113016	0.0769896	0.113953	0.235818	0.0725154
143	0.18994	0.151545	0.222265	0.44536	0.190357	0.187682	0.247496	0.282524	0.237039	0.56666	0.362808	0.181106	0.212195	0.269797	0.233385	0.184533	0.238876	0.223761	0.401651	0.318203	0.211715	0.104858	0.139878	0.118215	0.238865	0.0660176	0.0891971	0.238285	0.117337	0.244885	0.210424	0.219817	0.190588	0.304623	0.13706	0.0602271	0.061095	0.230979	0.0712749
144	0.193156	0.166786	0.216487	0.4407	0.187529	0.179027	0.254775	0.262696	0.236456	0.5498	0.362592	0.188238	0.224224	0.279413	0.271432	0.189908	0.280596	0.249457	0.390628	0.302643	0.217748	0.103567	0.141352	0.146573	0.254455	0.0936944	0.0686229	0.220235	0.126514	0.23684	0.162209	0.24762	0.179688	0.293837	0.0931005	0.0801022	0.0639352	0.216769	0.0725367
145	0.198006	0.153194	0.209659	0.443342	0.200085	0.166679	0.260771	0.277528	0.235951	0.532308	0.327888	0.217306	0.204657	0.284841	0.231475	0.178609	0.296086	0.226123	0.382312	0.316423	0.20456	0.100217	0.142319	0.127337	0.227633	0.0958123	0.0792781	0.220643	0.141605	0.251033	0.120424	0.255537	0.160037	0.296248	0.0817309	0.051767	0.109125	0.213385	0.0880041
146	0.19115	0.179003	0.207467	0.439223	0.16862	0.175541	0.249138	0.273857	0.232699	0.490067	0.369553	0.198962	0.231197	0.274499	0.247417	0.167931	0.285791	0.232024	0.397995	0.299183	0.209278	0.103124	0.145095	0.126543	0.240648	0.0762312	0.0599609	0.257393	0.119475	0.220561	0.159557	0.23197	0.194222	0.288183	0.0729146	0.0998231	0.115694	0.138651	0.0500927
147	0.200731	0.179906	0.211411	0.437945	0.193302	0.16527	0.240909	0.262741	0.255324	0.496546	0.363791	0.197794	0.22386	0.291383	0.240659	0.177957	0.315833	0.231011	0.381964	0.292692	0.202661	0.102277	0.132999	0.143107	0.273583	0.0622181	0.0968099	0.237894	0.123643	0.253097	0.149829	0.257138	0.193385	0.286	0.0958611	0.0601269	0.100756	0.208023	0.0717291
148	0.203599	0.199147	0.20218	0.435262	0.168552	0.14543	0.236414	0.250532	0.221431	0.472535	0.367264	0.187519	0.218524	0.272016	0.249003	0.159312	0.290111	0.21855	0.388404	0.300128	0.225237	0.0766072	0.132162	0.155559	0.298394	0.0470226	0.0841137	0.23606	0.144041	0.223349	0.139822	0.250776	0.177413	0.311743	0.115914	0.0351217	0.0998534	0.194698	0.0554933
149	0.188052	0.189218	0.203328	0.433858	0.168499	0.165808	0.243554	0.292116	0.192012	0.474933	0.356841	0.196589	0.224837	0.283016	0.238188	0.175063	0.273308	0.21155	0.382963	0.305833	0.216188	0.0740977	0.132935	0.137568	0.314166	0.0630091	0.0785151	0.225181	0.117668	0.229233	0.158681	0.256929	0.173818	0.284951	0.114173	0.0183408	0.107578	0.189624	0.0885716
150	0.208935	0.197463	0.200971	0.435738	0.168747	0.142523	0.241129	0.270433	0.218846	0.471951	0.352322	0.165436	0.207512	0.272943	0.253672	0.202941	0.281305	0.208584	0.367008	0.292381	0.203743	0.0722219	0.146658	0.113557	0.295818	0.081474	0.101067	0.214588	0.132585	0.228075	0.140378	0.255921	0.181272	0.297654	0.0983991	0.0147212	0.0875813	0.198161	0.103836
151	0.210663	0.197383	0.210663	0.432032	0.165531	0.158581	0.234309	0.255153	0.189449	0.446932	0.335491	0.168602	0.204214	0.268415	0.261645	0.185343	0.305841	0.231208	0.388193	0.294112	0.196098	0.0774591	0.116756	0.123978	0.318415	0.0750845	0.090857	0.218606	0.118567	0.244375	0.11941	0.230713	0.179109	0.302215	0.145943	0.0656902	0.0992431	0.249061	0.0739359
152	0.199959	0.196589	0.197785	0.450569	0.184516	0.152658	0.23616	0.239744	0.194639	0.486774	0.341558	0.166758	0.214758	0.278823	0.253879	0.175551	0.322342	0.205235	0.385198	0.27713	0.205119	0.0779175	0.132445	0.0862291	0.266785	0.0603668	0.0836877	0.227897	0.103112	0.217103	0.137655	0.206784	0.181755	0.275128	0.153707	0.049011	0.128236	0.270355	0.0241354
153	0.207099	0.206356	0.198883	0.450472	0.163358	0.153614	0.226648	0.266222	0.222698	0.520182	0.324287	0.163153	0.209128	0.278032	0.253934	0.168041	0.291382	0.201824	0.371808	0.300002	0.201533	0.0992068	0.13508	0.0882698	0.269408	0.0502034	0.0802084	0.2448	0.111318	0.199117	0.14583	0.211157	0.182442	0.263989	0.120613	0.0278065	0.128406	0.239251	0.0734606
154	0.19587	0.214182	0.205279	0.413023	0.164063	0.173183	0.216617	0.259067	0.215408	0.500021	0.353198	0.168596	0.219685	0.276228	0.225903	0.184436	0.292144	0.237925	0.366101	0.294898	0.210219	0.0763915	0.142013	0.12448	0.274772	0.0652491	0.111571	0.181127	0.116035	0.198177	0.139739	0.197266	0.167895	0.276552	0.103574	0.0411519	0.0861323	0.151741	0.0500629
155	0.211945	0.194733	0.206294	0.428838	0.175665	0.17115	0.241053	0.30053	0.182289	0.511071	0.348739	0.167707	0.205666	0.278676	0.226455	0.201339	0.30507	0.222574	0.368153	0.311727	0.204126	0.089329	0.110637	0.165038	0.235228	0.0736666	0.0823844	0.207173	0.142873	0.183685	0.186237	0.206308	0.16774	0.289926	0.101493	0.0673695	0.0934568	0.225092	0.124401
156	0.217276	0.186105	0.197328	0.431552	0.152077	0.16795	0.249795	0.27172	0.172922	0.540098	0.356186	0.157232	0.212069	0.276138	0.237995	0.20246	0.279323	0.221908	0.364005	0.298228	0.210645	0.0772268	0.154548	0.120692	0.272605	0.0735957	0.0814412	0.185068	0.162625	0.208074	0.201013	0.201492	0.169172	0.280573	0.109859	0.023926	0.123429	0.257534	0.0363565
157	0.199357	0.18623	0.192841	0.447044	0.135404	0.163035	0.272792	0.308082	0.215446	0.535907	0.351328	0.159657	0.221665	0.281544	0.242554	0.212656	0.336117	0.224087	0.378192	0.299408	0.225832	0.0651269	0.141788	0.120038	0.313277	0.0599867	0.092793	0.209074	0.125825	0.211633	0.166192	0.222385	0.171257	0.263291	0.154331	0.0464553	0.108671	0.26079	0.0858182
158	0.197524	0.19666	0.205756	0.439374	0.146601	0.173518	0.279962	0.284645	0.213652	0.500017	0.364519	0.186839	0.211947	0.278176	0.241231	0.198034	0.314944	0.215644	0.375169	0.286749	0.21497	0.0815514	0.134227	0.11241	0.244303	0.0400338	0.078741	0.196515	0.104129	0.212441	0.159016	0.243885	0.163252	0.246656	0.0962113	0.0427255	0.0718196	0.179341	-0.00393043
159	0.189274	0.193938	0.193523	0.430159	0.177098	0.198872	0.254802	0.297756	0.225892	0.4847	0.362089	0.170459	0.201119	0.278709	0.260948	0.199439	0.276051	0.238392	0.395716	0.308764	0.225579	0.0778988	0.137266	0.133798	0.32493	0.0205671	0.0770313	0.237303	0.0795405	0.204287	0.14578	0.208252	0.156292	0.256624	0.121823	0.0514522	0.0918853	0.226919	0.0151794
160	0.195878	0.19195	0.193032	0.415047	0.156891	0.153148	0.254614	0.289734	0.228087	0.455068	0.373574	0.157414	0.211562	0.28835	0.270912	0.187255	0.285986	0.219273	0.386503	0.29024	0.20443	0.0848236	0.133778	0.127831	0.277695	0.0462089	0.053799	0.239737	0.0901757	0.191805	0.120162	0.231785	0.135473	0.24259	0.16229	0.0207379	0.0500223	0.14681	0.0205719
161	0.212087	0.181959	0.185995	0.421327	0.176727	0.177112	0.253111	0.280929	0.234094	0.50197	0.359111	0.17291	0.205842	0.283704	0.250397	0.213581	0.251437	0.204647	0.379578	0.297261	0.201981	0.0665382	0.125308	0.122617	0.287806	0.0482308	0.0788582	0.202372	0.0938309	0.161489	0.150515	0.246833	0.157563	0.250223	0.133641	0.00260606	0.0993726	0.210972	-0.0137039
162	0.20558	0.190012	0.195183	0.436775	0.181483	0.166583	0.247516	0.307325	0.240712	0.466239	0.327301	0.181425	0.205968	0.289179	0.250165	0.208082	0.293809	0.21335	0.390831	0.30141	0.212303	0.0801814	0.122328	0.12879	0.304247	0.0167227	0.0805341	0.207555	0.133795	0.186449	0.161292	0.203243	0.165602	0.258876	0.150813	0.0242496	0.100374	0.123438	0.00183107
163	0.188907	0.1869	0.194321	0.433281	0.147677	0.186825	0.253835	0.259765	0.243418	0.508833	0.367899	0.209819	0.219621	0.281232	0.258935	0.196478	0.28732	0.223954	0.386177	0.286342	0.198819	0.0847183	0.13633	0.143994	0.32454	0.047707	0.0776309	0.230376	0.076788	0.200436	0.14725	0.245663	0.170228	0.251987	0.102455	0.0779477	0.11671	0.156297	-0.0154466
164	0.193058	0.181116	0.183156	0.444989	0.142027	0.151648	0.273377	0.269108	0.232912	0.499362	0.366584	0.227422	0.212507	0.283271	0.246146	0.195503	0.314201	0.240801	0.376877	0.288464	0.219863	0.0948227	0.139609	0.114	0.342132	0.0199998	0.0839232	0.184817	0.133515	0.187844	0.136949	0.217452	0.157137	0.248316	0.114037	0.0419941	0.115479	0.204019	0.0079682
165	0.197869	0.171498	0.200213	0.418775	0.152036	0.160592	0.268481	0.252309	0.221895	0.497599	0.38923	0.180252	0.21162	0.289146	0.263445	0.202283	0.26156	0.214535	0.382852	0.280386	0.213371	0.0835599	0.13917	0.0878118	0.355916	0.0342076	0.0527557	0.191184	0.0981977	0.186011	0.161662	0.246246	0.156701	0.249227	0.13029	0.0341102	0.0907075	0.186313	0.00140325
166	0.200284	0.184042	0.209586	0.414136	0.154187	0.155292	0.255069	0.272887	0.237041	0.499588	0.356014	0.18383	0.201082	0.288867	0.239402	0.179534	0.272871	0.223647	0.371963	0.302083	0.216101	0.0714972	0.148887	0.1022	0.326012	0.0420966	0.0738207	0.210032	0.0506565	0.149154	0.168141	0.232379	0.154641	0.242959	0.143535	0.0582502	0.0565512	0.16052	0.0194862
167	0.211283	0.179802	0.211118	0.424288	0.150852	0.168263	0.272633	0.258293	0.258905	0.509795	0.373455	0.178647	0.191573	0.279928	0.251717	0.174451	0.224568	0.211485	0.356828	0.281995	0.207592	0.0748451	0.143972	0.0786484	0.289061	0.0391183	0.071858	0.196236	0.103212	0.187819	0.137233	0.191439	0.126164	0.256016	0.141692	0.00751303	0.0675218	0.108733	0.00345211
168	0.186317	0.18558	0.212892	0.434971	0.15822	0.129061	0.25742	0.244155	0.230089	0.525479	0.362795	0.171585	0.194407	0.283994	0.262838	0.177712	0.214323	0.221105	0.35605	0.257124	0.216033	0.0682318	0.126075	0.116844	0.32198	0.0260657	0.0650482	0.205714	0.127112	0.149764	0.161842	0.193904	0.13978	0.260531	0.09853	-0.00158878	0.0695628	0.111968	0.0583827
169	0.19785	0.182605	0.204026	0.432371	0.139203	0.160473	0.249815	0.260003	0.208733	0.557345	0.368626	0.178032	0.189391	0.276623	0.241915	0.175416	0.211862	0.207526	0.372835	0.278917	0.221095	0.0670499	0.160749	0.0950374	0.296717	0.04319	0.0685695	0.228336	0.108244	0.1605	0.146838	0.207285	0.171352	0.247456	0.120342	0.038241	0.0609748	0.151665	-0.0221669
170	0.200097	0.184363	0.190241	0.436527	0.156349	0.162958	0.244095	0.252769	0.222692	0.545168	0.338008	0.172097	0.205748	0.277064	0.230783	0.187975	0.215239	0.203738	0.361428	0.289516	0.202931	0.0723413	0.138362	0.112194	0.28289	0.0424154	0.0679613	0.186356	0.118484	0.188087	0.13278	0.215687	0.141487	0.267754	0.107541	0.0387718	0.0574711	0.176504	-0.04164
171	0.230218	0.186255	0.205807	0.435118	0.12859	0.16763	0.223399	0.260755	0.221041	0.579391	0.33562	0.156089	0.19318	0.283178	0.238947	0.183247	0.184195	0.195462	0.361921	0.262366	0.219897	0.089077	0.140629	0.0834234	0.303828	0.016964	0.0744884	0.170406	0.0903378	0.184651	0.128697	0.232679	0.15573	0.256865	0.110362	0.0256918	0.0934939	0.149899	-0.0177731
172	0.218913	0.201836	0.174808	0.435282	0.170375	0.180035	0.231478	0.255396	0.21699	0.555005	0.353402	0.151282	0.199585	0.288178	0.212863	0.195279	0.193914	0.227966	0.358633	0.267321	0.202139	0.0750556	0.136879	0.097664	0.277386	0.0198159	0.0545702	0.193385	0.096858	0.176267	0.139848	0.195225	0.142137	0.258108	0.149012	0.00571905	0.0826106	0.137653	-0.0617128
173	0.222688	0.197125	0.186191	0.413617	0.163375	0.187804	0.240338	0.238695	0.218039	0.567168	0.324984	0.130441	0.190445	0.27547	0.255892	0.177389	0.219302	0.202076	0.345744	0.271883	0.213398	0.0609431	0.142301	0.0788918	0.338933	0.0112977	0.0587076	0.194991	0.085932	0.183212	0.130081	0.208731	0.124091	0.250437	0.0737401	0.0902666	0.11659	0.0910049	0.0285778
174	0.227592	0.201728	0.206897	0.438942	0.144574	0.187364	0.218757	0.240281	0.269483	0.564612	0.344445	0.15052	0.199125	0.278445	0.233194	0.199729	0.249874	0.19899	0.356937	0.275519	0.224645	0.0564108	0.155142	0.0393644	0.310604	0.0248715	0.0813104	0.195671	0.128623	0.173921	0.15272	0.194066	0.121697	0.272017	0.081816	0.027619	0.106224	0.179431	0.0353056
175	0.220265	0.20122	0.182654	0.438241	0.155664	0.165868	0.208946	0.240918	0.253597	0.524998	0.338332	0.155472	0.212025	0.268372	0.235004	0.189156	0.24624	0.220247	0.359727	0.254377	0.213053	0.0483009	0.113587	0.0800816	0.323595	0.00109365	0.0658227	0.192517	0.0770861	0.184489	0.0916571	0.182734	0.136351	0.264825	0.0777377	0.0335039	0.0744545	0.199632	0.0210978
176	0.229113	0.191422	0.202113	0.445255	0.159966	0.190003	0.191044	0.243115	0.24791	0.560327	0.314364	0.163781	0.201003	0.26632	0.228622	0.205874	0.21591	0.20223	0.34214	0.245961	0.221008	0.0659102	0.125498	0.111693	0.330461	0.00656357	0.0455745	0.169953	0.0834891	0.204803	0.102199	0.212789	0.132049	0.258381	0.140187	0.0639176	0.0651217	0.112759	0.0382686
177	0.249327	0.178899	0.194775	0.421744	0.145882	0.17934	0.186695	0.265627	0.246065	0.556579	0.341225	0.163585	0.204183	0.277813	0.225107	0.173184	0.233472	0.200117	0.328153	0.263095	0.224585	0.0604601	0.126347	0.109007	0.329341	0.00177464	0.0572926	0.184656	0.0965455	0.158187	0.0990271	0.220156	0.138767	0.246667	0.105482	0.0417906	0.109827	0.069079	0.0438049
178	0.225673	0.185614	0.180672	0.399685	0.164808	0.184405	0.198753	0.278403	0.255032	0.553607	0.345567	0.183825	0.193403	0.275079	0.239361	0.182171	0.213859	0.198228	0.338739	0.257788	0.209276	0.0768021	0.141851	0.0845564	0.327056	0.0416835	0.0549486	0.19012	0.0695091	0.18271	0.0604701	0.179202	0.135944	0.268245	0.0968853	0.0395402	0.107575	0.128501	0.0606621
179	0.233695	0.189397	0.201048	0.397673	0.151185	0.176084	0.18784	0.255257	0.255028	0.557228	0.348031	0.176827	0.184878	0.271195	0.219832	0.200309	0.206032	0.20205	0.338119	0.267283	0.218526	0.0767412	0.155455	0.0703823	0.308468	0.0335079	0.0463354	0.193796	0.111048	0.173691	0.133474	0.225055	0.110789	0.268251	0.105909	0.0336093	0.10917	0.140782	0.0714706
180	0.23505	0.176235	0.204363	0.416801	0.141568	0.16657	0.212267	0.24548	0.213008	0.544128	0.350157	0.17333	0.196362	0.269874	0.233311	0.19337	0.209146	0.19805	0.33673	0.257994	0.201159	0.0850723	0.165897	0.0722153	0.296425	0.0133193	0.0519567	0.165992	0.054414	0.206625	0.148155	0.19945	0.143893	0.26147	0.0728873	0.0493076	0.122642	0.118728	0.0181819
181	0.249535	0.183232	0.182739	0.425587	0.140285	0.156551	0.216273	0.266957	0.224233	0.507739	0.355827	0.1702	0.196458	0.267272	0.227837	0.178147	0.176249	0.217587	0.330252	0.247942	0.210494	0.0762504	0.141646	0.0653529	0.301346	0.017026	0.0513532	0.174226	0.10689	0.172319	0.115684	0.201496	0.135367	0.265738	0.0862163	0.0546235	0.122841	0.120697	0.023965
182	0.241231	0.193325	0.210095	0.441484	0.1397	0.159865	0.183317	0.287715	0.243924	0.544508	0.325458	0.155989	0.194825	0.249305	0.241999	0.178063	0.214037	0.238342	0.343373	0.276549	0.209731	0.0767016	0.138255	0.133424	0.268268	0.0280029	0.0578249	0.200649	0.112402	0.209402	0.146798	0.219397	0.121016	0.270289	0.0923059	0.0232792	0.106659	0.0925028	0.0145899
183	0.245362	0.176547	0.197617	0.420221	0.134205	0.150587	0.19891	0.25281	0.248362	0.511038	0.33892	0.163477	0.184834	0.266258	0.234559	0.205907	0.184501	0.198937	0.322324	0.281646	0.197335	0.0869024	0.148718	0.08792	0.315834	0.00642711	0.060771	0.185109	0.0970236	0.188536	0.120225	0.236488	0.130358	0.23965	0.0944897	0.058322	0.0953904	0.121076	-0.0146533
184	0.254239	0.171775	0.189741	0.42785	0.125521	0.153256	0.185196	0.266752	0.242694	0.493254	0.345009	0.156697	0.181316	0.266743	0.259829	0.206724	0.231482	0.19683	0.337643	0.250153	0.195964	0.0811013	0.141886	0.144989	0.305767	0.0132909	0.0529409	0.156408	0.0778503	0.21446	0.129709	0.225368	0.132676	0.259475	0.0763222	0.0895471	0.09198	0.175471	0.0379824
185	0.241874	0.170894	0.187823	0.435909	0.142105	0.138507	0.198991	0.279091	0.271311	0.499241	0.373278	0.16617	0.181511	0.268714	0.241357	0.196856	0.228972	0.212245	0.324435	0.240028	0.203424	0.0923742	0.152609	0.14042	0.311909	0.0250982	0.0626074	0.177382	0.102149	0.228121	0.125269	0.180566	0.145194	0.255281	0.11287	0.058532	0.0729423	0.156767	0.0329604
186	0.219161	0.164525	0.195033	0.426285	0.134271	0.177915	0.21355	0.259096	0.222552	0.505172	0.363346	0.146873	0.205673	0.276216	0.281297	0.180543	0.244902	0.204293	0.318124	0.25939	0.207122	0.0832833	0.124711	0.125657	0.252272	0.00633062	0.0619734	0.148359	0.102941	0.214721	0.137115	0.225528	0.118688	0.251895	0.0542317	0.0502388	0.120827	0.136594	0.0553129
187	0.24085	0.164689	0.187936	0.422159	0.139778	0.150289	0.193311	0.237864	0.268416	0.527281	0.356715	0.147798	0.200189	0.286396	0.269773	0.185387	0.237537	0.206747	0.318085	0.279619	0.206272	0.069783	0.128772	0.14656	0.284679	-0.00129785	0.0464377	0.181495	0.0997951	0.203799	0.132978	0.221167	0.118423	0.231495	0.097842	0.0367847	0.125001	0.131379	0.0163111
188	0.235932	0.167249	0.201802	0.417292	0.139902	0.15249	0.213296	0.272164	0.223875	0.529297	0.340036	0.160102	0.186996	0.288913	0.264741	0.168333	0.254971	0.234111	0.330625	0.268012	0.199188	0.0858589	0.089531	0.0980206	0.302274	0.00694472	0.0486676	0.167171	0.119016	0.215626	0.111955	0.202389	0.120047	0.250438	0.078837	0.0716876	0.125767	0.156747	0.013489
189	0.22765	0.18104	0.202548	0.411363	0.135181	0.14025	0.246557	0.283534	0.225752	0.52182	0.350949	0.140133	0.186624	0.280484	0.262335	0.192549	0.218436	0.195604	0.332921	0.28978	0.197774	0.0898725	0.128668	0.141543	0.253644	-0.0117037	0.0458706	0.163798	0.131235	0.206727	0.112127	0.212508	0.123236	0.257325	0.0558828	0.0433653	0.107685	0.136037	0.076105
190	0.220391	0.172284	0.189193	0.43407	0.150734	0.136974	0.211498	0.258231	0.226602	0.533373	0.366906	0.180255	0.181116	0.279348	0.253408	0.165643	0.26647	0.209617	0.330472	0.250022	0.216377	0.0963103	0.131361	0.123972	0.274791	-0.0151873	0.0601564	0.167371	0.0889692	0.191759	0.127656	0.213129	0.129843	0.24165	0.0654016	0.0664704	0.084488	0.176382	0.0258545
191	0.203784	0.184251	0.200422	0.435615	0.155538	0.143908	0.18882	0.27181	0.258829	0.532682	0.361154	0.162286	0.188408	0.281036	0.274325	0.204428	0.189846	0.210654	0.32957	0.236663	0.202538	0.0814011	0.131464	0.142785	0.315127	0.0205225	0.0426693	0.164772	0.0997654	0.157344	0.12855	0.191578	0.139083	0.253851	0.0256007	0.069291	0.0860405	0.165493	0.0902385
192	0.222518	0.178552	0.194726	0.425144	0.150802	0.127509	0.187358	0.290263	0.237895	0.543111	0.340933	0.175884	0.175952	0.262727	0.258671	0.184727	0.210362	0.234195	0.336645	0.273037	0.214249	0.0868125	0.119242	0.144144	0.274638	-0.0228916	0.0578717	0.168256	0.109026	0.213183	0.10262	0.235264	0.12611	0.273987	0.04068	0.033673	0.140204	0.113622	0.0921939
193	0.216549	0.17782	0.183694	0.413419	0.12527	0.118291	0.187192	0.242256	0.237863	0.510559	0.339747	0.164945	0.184802	0.279617	0.278114	0.2104	0.229126	0.216373	0.331628	0.26501	0.199938	0.0805092	0.140925	0.132066	0.282623	-0.0134535	0.045183	0.152884	0.0959347	0.216158	0.120037	0.220397	0.126431	0.291728	0.0347267	0.0639849	0.086577	0.134823	0.0487067
194	0.196145	0.1776	0.193131	0.413527	0.144193	0.105127	0.190625	0.266922	0.234791	0.516207	0.330036	0.16067	0.187128	0.283381	0.267303	0.202382	0.219778	0.223749	0.324632	0.257573	0.201004	0.105933	0.127548	0.139982	0.27384	-0.000205712	0.075469	0.17646	0.111161	0.208329	0.136449	0.226358	0.122809	0.280182	0.0263169	0.0599833	0.0912602	0.15471	0.01825
195	0.196577	0.181972	0.179235	0.391756	0.15238	0.122644	0.18052	0.222915	0.233904	0.508353	0.329017	0.15737	0.187263	0.27792	0.287335	0.202765	0.216847	0.235679	0.33895	0.264662	0.19776	0.0920824	0.143034	0.0951409	0.27879	-0.00461616	0.0645063	0.137123	0.0981626	0.20583	0.125687	0.209863	0.133067	0.277964	0.00875048	0.0296845	0.0995987	0.137416	0.091718
196	0.218875	0.189472	0.200647	0.390055	0.133512	0.141131	0.1756	0.247949	0.221713	0.492605	0.326519	0.172871	0.191901	0.290387	0.281166	0.226388	0.197781	0.213423	0.322843	0.266437	0.202541	0.0902394	0.121866	0.065673	0.258432	0.0175617	0.0668755	0.129451	0.0998884	0.221041	0.111548	0.225318	0.102459	0.30197	-0.0115302	0.0558686	0.0919226	0.123544	0.0223114
197	0.226338	0.195505	0.200119	0.402004	0.151561	0.130665	0.181581	0.268437	0.257167	0.54217	0.334865	0.1932	0.189915	0.282967	0.267394	0.219468	0.196463	0.233776	0.325682	0.261437	0.19443	0.0897113	0.152326	0.0694945	0.253682	0.00543499	0.0907856	0.16505	0.0923806	0.212387	0.131566	0.192229	0.14729	0.276517	0.0326711	-0.0139524	0.108532	0.125095	0.0383786
198	0.206038	0.179625	0.205604	0.415293	0.141031	0.128131	0.181638	0.221831	0.238641	0.515705	0.327802	0.161701	0.188982	0.278276	0.279968	0.202118	0.222616	0.207003	0.32987	0.267441	0.214698	0.0633446	0.112672	0.0745924	0.250513	0.0287719	0.0586406	0.147278	0.04938	0.20676	0.0879362	0.21929	0.144421	0.266983	0.0594916	0.0191004	0.0965675	0.116975	0.0844718
199	0.220432	0.185311	0.181512	0.407158	0.146957	0.118804	0.165612	0.2698	0.227094	0.527237	0.330395	0.171582	0.173801	0.270063	0.256356	0.226115	0.231314	0.19047	0.317504	0.250244	0.207192	0.0953969	0.112739	0.0813722	0.272537	0.0411747	0.0597856	0.160703	0.05838	0.203986	0.0874349	0.183174	0.134775	0.275186	-0.00123266	0.0351283	0.0793168	0.129857	-0.0145302
200	0.215749	0.179813	0.192938	0.391682	0.147841	0.0770115	0.157317	0.276581	0.219652	0.500159	0.331218	0.161381	0.189113	0.270384	0.261224	0.199015	0.208775	0.197629	0.313645	0.271	0.211458	0.0773337	0.135375	0.112647	0.267455	0.0504573	0.0725951	0.157717	0.0752865	0.183338	0.095691	0.152305	0.139071	0.290972	0.028558	0.0837895	0.0949736	0.129784	0.089315
201	0.218452	0.191219	0.188192	0.400794	0.143264	0.0905197	0.158155	0.271658	0.263338	0.49253	0.312898	0.169319	0.190572	0.273021	0.269651	0.215671	0.216635	0.199913	0.322756	0.279905	0.193552	0.0843239	0.164968	0.0983812	0.240471	0.0488643	0.0619227	0.144349	0.0844627	0.183019	0.131296	0.170385	0.111487	0.288182	-0.0075296	0.0595502	0.0642529	0.101734	0.0551714
202	0.226277	0.19281	0.187372	0.387153	0.14915	0.0941078	0.179845	0.255875	0.24566	0.534612	0.330913	0.139993	0.191166	0.28107	0.245884	0.207105	0.208472	0.203966	0.32308	0.261335	0.207188	0.0809243	0.124371	0.149252	0.231706	0.033573	0.0584489	0.139898	0.0429142	0.199059	0.103969	0.212833	0.135614	0.291124	0.0475618	0.0399868	0.101579	0.137791	0.0810992
203	0.223176	0.179141	0.206456	0.375617	0.137658	0.12727	0.162933	0.282998	0.262539	0.506934	0.369035	0.141271	0.19189	0.274221	0.230173	0.210327	0.215872	0.191008	0.304735	0.274083	0.211208	0.0932826	0.150072	0.145374	0.265753	0.0625134	0.0597636	0.141484	0.0952822	0.182054	0.0825727	0.20054	0.115584	0.284124	0.0480887	0.0671513	0.0895721	0.13618	0.034254
204	0.228726	0.193796	0.182883	0.365342	0.138663	0.118172	0.157658	0.239574	0.242951	0.502507	0.33381	0.16464	0.190831	0.267641	0.265097	0.228182	0.248394	0.192048	0.309689	0.270324	0.182594	0.108964	0.124611	0.165164	0.271482	0.0462765	0.058307	0.160142	0.0690153	0.157861	0.102151	0.14149	0.131382	0.280481	-0.00236783	0.0614643	0.13075	0.0681871	0.0632494
205	0.23235	0.189109	0.200965	0.372065	0.14133	0.125428	0.169521	0.2275	0.284849	0.515365	0.327975	0.163413	0.202173	0.284324	0.236174	0.216416	0.268681	0.194674	0.312459	0.255372	0.175125	0.0779459	0.126854	0.12369	0.264952	0.0469914	0.0487	0.147052	0.0698737	0.156016	0.136992	0.188026	0.0820556	0.281091	-0.0237544	-0.00302322	0.0927674	0.116481	0.0117349
206	0.241181	0.189165	0.187974	0.378464	0.109592	0.151703	0.176843	0.217032	0.246443	0.503389	0.316022	0.17008	0.189101	0.278642	0.244947	0.214728	0.231065	0.205431	0.298258	0.282378	0.195491	0.0908653	0.137023	0.113336	0.287791	0.0384395	0.0453749	0.1514	0.0832091	0.158811	0.143282	0.192425	0.12145	0.292682	0.00258699	0.0615893	0.0981773	0.204677	0.0420695
207	0.245566	0.194087	0.201047	0.369288	0.137557	0.147101	0.15674	0.18121	0.252692	0.505827	0.323165	0.178785	0.187961	0.2746	0.247712	0.212461	0.217838	0.183001	0.296718	0.255257	0.212387	0.0889913	0.158536	0.129436	0.263588	0.0601988	0.0658163	0.140018	0.0691394	0.164398	0.122721	0.205552	0.115084	0.291552	0.0442559	0.00753378	0.104682	0.0774824	0.0652889
208	0.260925	0.187867	0.182542	0.35685	0.111327	0.142155	0.131798	0.23659	0.244928	0.518379	0.308689	0.190082	0.196843	0.281278	0.25658	0.203631	0.195161	0.203909	0.324375	0.273819	0.205849	0.0785184	0.171354	0.132909	0.279573	0.0551781	0.0826411	0.131398	0.0890705	0.144794	0.105533	0.195738	0.0866447	0.321018	0.00584601	0.0679301	0.1255	0.0810678	0.0409734
209	0.244688	0.209738	0.182721	0.355823	0.13205	0.154804	0.139188	0.240185	0.309925	0.500387	0.326743	0.177423	0.20232	0.282609	0.261464	0.214956	0.199088	0.173363	0.30239	0.257723	0.205776	0.0732312	0.154347	0.112538	0.250148	0.065505	0.0493473	0.114576	0.0922543	0.150546	0.101201	0.186549	0.111898	0.326117	0.0344934	0.00679732	0.0860538	0.117187	0.0307368
210	0.255373	0.203807	0.211361	0.358747	0.13019	0.170786	0.120389	0.266558	0.2909	0.502896	0.331823	0.185253	0.192849	0.282184	0.259276	0.188306	0.19899	0.18259	0.327577	0.261092	0.203164	0.0785635	0.136572	0.17742	0.257602	0.0653714	0.0411418	0.138052	0.0863876	0.172364	0.118338	0.223788	0.108152	0.283754	0.0377493	-0.0293124	0.0831401	0.0992093	0.0440797
211	0.241818	0.199862	0.204513	0.371148	0.113777	0.164678	0.130063	0.215496	0.280042	0.486157	0.328358	0.188216	0.196959	0.274319	0.270625	0.217219	0.196037	0.184165	0.312588	0.241289	0.203455	0.0735024	0.151673	0.145973	0.231098	0.0642053	0.045383	0.167493	0.0614471	0.137317	0.143842	0.209497	0.0954247	0.280792	0.0674474	0.0402743	0.0704316	0.0752218	0.0443011
212	0.242269	0.209412	0.206613	0.362803	0.136043	0.14736	0.143997	0.217625	0.273859	0.50665	0.317937	0.186309	0.171128	0.279919	0.266004	0.206233	0.213427	0.170148	0.329869	0.244477	0.197183	0.0768215	0.122941	0.13099	0.260179	0.0567874	0.0699782	0.15109	0.093657	0.14749	0.117625	0.171157	0.109757	0.264533	0.00698402	0.0429673	0.0764368	0.0639195	0.0505929
213	0.245854	0.193883	0.19977	0.352401	0.13682	0.121352	0.139338	0.220697	0.276787	0.487103	0.311211	0.163825	0.192158	0.274616	0.254719	0.222607	0.227409	0.165309	0.323101	0.253094	0.197926	0.0920356	0.150177	0.163098	0.275148	0.0556907	0.0698845	0.158323	0.0856438	0.180429	0.0970959	0.166303	0.086911	0.281743	-2.38403e-05	0.0265461	0.0818523	0.127102	0.0550548
214	0.239817	0.186281	0.214384	0.361776	0.142048	0.122016	0.139352	0.224231	0.288237	0.48005	0.294915	0.143423	0.179697	0.265598	0.266724	0.209898	0.223847	0.178503	0.320506	0.245717	0.218666	0.0888903	0.173817	0.179277	0.283914	0.0795936	0.0495454	0.180507	0.0932518	0.166877	0.0738854	0.194541	0.0890583	0.280356	-0.0519977	0.0469552	0.0540674	0.0781799	0.0956614
215	0.240984	0.196112	0.207201	0.363423	0.12339	0.13932	0.164758	0.202016	0.253562	0.487778	0.318232	0.148448	0.186393	0.25753	0.255569	0.191974	0.206868	0.17661	0.305843	0.258661	0.203121	0.104873	0.178661	0.180415	0.313144	0.0718392	0.0414126	0.153384	0.119455	0.166294	0.107459	0.163289	0.0934971	0.268131	-0.0023082	0.073563	0.0828679	0.119041	0.0275301
216	0.22739	0.198093	0.2058	0.341351	0.120808	0.140225	0.151026	0.227595	0.269345	0.499194	0.317286	0.138097	0.174888	0.275921	0.268355	0.205862	0.190964	0.192794	0.325956	0.255364	0.212903	0.0863565	0.16238	0.167815	0.285193	0.0508712	0.0313622	0.130378	0.101522	0.132798	0.107699	0.190888	0.0755449	0.261648	0.0112202	0.049092	0.0945592	0.113667	0.036891
217	0.242221	0.210635	0.187253	0.343745	0.130982	0.127998	0.140428	0.222178	0.250254	0.498373	0.305872	0.130546	0.196785	0.26089	0.263355	0.187813	0.209215	0.168651	0.313649	0.250167	0.195771	0.093543	0.152622	0.174019	0.280077	0.0732582	0.0438047	0.146777	0.11052	0.138181	0.0658164	0.147245	0.0810936	0.243431	-0.00400479	0.0512788	0.0943987	0.132198	0.0400204
218	0.233095	0.192415	0.196479	0.331646	0.145706	0.125112	0.147726	0.224822	0.235796	0.465288	0.332364	0.128866	0.182496	0.273418	0.267762	0.201935	0.229114	0.178822	0.315901	0.266818	0.20858	0.0823454	0.110297	0.163029	0.277788	0.0474434	0.046401	0.149646	0.134273	0.142013	0.0906654	0.180971	0.0969947	0.239275	-0.0241631	0.0295004	0.0666592	0.153124	0.0671021
219	0.248921	0.197867	0.183931	0.338002	0.123509	0.116087	0.178455	0.213693	0.231057	0.460407	0.317571	0.126805	0.194436	0.268286	0.250601	0.206931	0.264573	0.193824	0.320643	0.247007	0.21502	0.085144	0.136089	0.152876	0.319689	0.0561179	0.0467626	0.163689	0.0951707	0.156421	0.0657509	0.164775	0.086377	0.226311	-0.0402365	0.0571079	0.069995	0.103635	0.0737178
220	0.229136	0.190698	0.187638	0.322987	0.150913	0.116822	0.1411	0.234985	0.259353	0.461008	0.325525	0.118898	0.179498	0.280457	0.234843	0.19049	0.245859	0.192336	0.309327	0.273685	0.208544	0.0933543	0.11359	0.129058	0.289164	0.0503481	0.0438668	0.153877	0.135124	0.126897	0.0778716	0.179536	0.0872926	0.266191	0.0171219	0.0217228	0.071951	0.101324	0.0941822
221	0.221161	0.208427	0.201295	0.31255	0.140934	0.130246	0.165543	0.226567	0.248653	0.443194	0.300816	0.135451	0.179058	0.276132	0.238289	0.189742	0.309314	0.178427	0.322144	0.249719	0.218144	0.110748	0.100922	0.166188	0.306517	0.0806101	0.0177649	0.176285	0.0618415	0.102904	0.0399128	0.152686	0.104168	0.243105	0.0186986	0.0456057	0.102368	0.109027	0.0968797
222	0.221367	0.210041	0.182622	0.335231	0.150106	0.154617	0.17241	0.25181	0.228211	0.47954	0.321015	0.143536	0.179894	0.262609	0.243375	0.194802	0.30956	0.179967	0.316043	0.264552	0.2225	0.104971	0.114474	0.160477	0.283395	0.0514858	0.0282617	0.148474	0.0983289	0.128647	0.055012	0.165579	0.122749	0.251755	-0.0217896	0.0184809	0.0775922	0.0898413	0.0703923
223	0.233364	0.205165	0.180384	0.351334	0.148905	0.147709	0.152409	0.229772	0.219637	0.475526	0.313778	0.137521	0.188214	0.264803	0.23836	0.167277	0.307451	0.189433	0.318745	0.262504	0.222685	0.111841	0.119773	0.176382	0.282896	0.0434959	0.042849	0.126981	0.0938544	0.152557	0.0835336	0.121265	0.100027	0.259299	0.00135734	0.0222815	0.0564688	0.113229	0.015097
224	0.245527	0.201475	0.192711	0.351116	0.130875	0.13344	0.179153	0.193233	0.183922	0.457379	0.290542	0.120111	0.173811	0.269126	0.243314	0.186405	0.278956	0.17401	0.317173	0.274831	0.222431	0.109962	0.136647	0.186876	0.288235	0.0395504	0.0548253	0.136694	0.0577537	0.144366	0.109425	0.173843	0.0743893	0.249181	-0.0152724	0.00812565	0.0944493	0.12443	0.0446744
225	0.250978	0.20137	0.189447	0.358823	0.132711	0.154264	0.170722	0.191211	0.194562	0.476975	0.322133	0.0925765	0.178593	0.263233	0.250413	0.193519	0.269028	0.181119	0.31662	0.258632	0.21228	0.112707	0.111331	0.175793	0.301115	0.0483989	0.0565356	0.13624	0.0627061	0.155557	0.0725419	0.14829	0.092364	0.258498	-0.0163138	0.0320932	0.0567634	0.158895	0.0378674
226	0.253261	0.193335	0.180395	0.379813	0.141768	0.156701	0.185557	0.193112	0.175353	0.480953	0.306243	0.0793721	0.172248	0.270855	0.247732	0.177811	0.279803	0.163854	0.301705	0.280341	0.204861	0.103888	0.128297	0.139928	0.322569	0.0789632	0.0901714	0.15536	0.0776413	0.156562	0.0807079	0.154907	0.106638	0.24881	-0.0531882	0.004516	0.0924307	0.136126	0.0354659
227	0.256425	0.206013	0.177774	0.357656	0.153197	0.160764	0.19532	0.208514	0.189773	0.469735	0.301791	0.125467	0.182119	0.264469	0.223458	0.180234	0.284712	0.183547	0.311518	0.261277	0.212864	0.107734	0.140522	0.155626	0.330382	0.0589925	0.0512872	0.137448	0.0410972	0.149591	0.0953406	0.115251	0.070868	0.275022	-0.00928312	0.00124341	0.0952622	0.0888031	0.0467918
228	0.235132	0.192181	0.190026	0.324621	0.114711	0.135014	0.187611	0.211669	0.185014	0.44606	0.290836	0.104553	0.184547	0.260999	0.227183	0.192201	0.266226	0.1861	0.315001	0.264273	0.206162	0.111723	0.140163	0.155485	0.314519	0.0433461	0.0696843	0.178781	0.0999028	0.145177	0.0654088	0.140591	0.107762	0.217701	0.000121132	-0.0551123	0.102981	0.175243	0.0650804
229	0.251419	0.187457	0.218532	0.327242	0.128987	0.174424	0.207406	0.184272	0.20694	0.463058	0.32805	0.120508	0.166428	0.268872	0.234649	0.192603	0.311851	0.202561	0.328103	0.266644	0.198607	0.118756	0.154295	0.167219	0.338467	0.0651434	0.094723	0.157414	0.0761666	0.159542	0.0798884	0.0733035	0.105965	0.255521	-0.0274112	-0.00413582	0.121761	0.157282	0.0757986
230	0.249633	0.193691	0.186514	0.326128	0.109406	0.184653	0.193879	0.203435	0.198586	0.441261	0.325313	0.120923	0.185855	0.26217	0.208569	0.163538	0.237726	0.170514	0.324995	0.255448	0.218016	0.10572	0.165951	0.117585	0.309489	0.0656476	0.057602	0.123047	0.0726645	0.15741	0.065601	0.087157	0.10289	0.232651	0.0278822	-0.0484188	0.139921	0.138316	0.0669605
231	0.229535	0.187572	0.201738	0.333846	0.114862	0.188662	0.205179	0.188628	0.183267	0.45576	0.313955	0.101736	0.165566	0.259168	0.209697	0.178305	0.237666	0.184773	0.310047	0.255815	0.214188	0.117309	0.180854	0.174741	0.311304	0.0545766	0.0731639	0.159415	0.0960629	0.155389	0.0718357	0.114331	0.0841381	0.268343	-0.0323035	0.00843891	0.058116	0.127065	0.108748
232	0.250697	0.201932	0.215231	0.316131	0.149116	0.180987	0.225607	0.178757	0.192036	0.477599	0.305594	0.116362	0.179663	0.258842	0.209878	0.195705	0.236598	0.19373	0.337149	0.252824	0.212562	0.113492	0.167209	0.16852	0.238063	0.0528221	0.0868672	0.144887	0.105879	0.160672	0.0831667	0.106025	0.0933527	0.251098	-0.0456865	0.0309823	0.123595	0.0907205	0.0626165
233	0.239923	0.180136	0.199778	0.312995	0.125759	0.210798	0.219938	0.182076	0.16123	0.486403	0.303157	0.129418	0.182605	0.257174	0.223502	0.162102	0.284367	0.211236	0.336584	0.237229	0.198361	0.106522	0.162099	0.192633	0.29869	0.0710823	0.0664378	0.149515	0.0647924	0.163062	0.094427	0.094393	0.0897957	0.246053	0.0135488	0.00128278	0.105804	0.13079	0.107058
234	0.255719	0.190936	0.205375	0.315343	0.10048	0.152342	0.228694	0.202524	0.16595	0.45548	0.326155	0.121955	0.173706	0.254293	0.212008	0.183572	0.232051	0.19626	0.355591	0.243558	0.234345	0.102835	0.171565	0.149782	0.307875	0.0782195	0.0925689	0.175956	0.045543	0.151512	0.0626625	0.126806	0.0812654	0.223119	-0.00936234	-0.031918	0.0929736	0.112662	0.068085
235	0.252833	0.195551	0.20168	0.316704	0.107886	0.174445	0.221384	0.215387	0.163827	0.461024	0.31065	0.130211	0.161489	0.258195	0.205699	0.169021	0.241446	0.212458	0.346879	0.244136	0.199082	0.105659	0.155405	0.167686	0.332132	0.0631457	0.0487863	0.17123	0.0623375	0.162388	0.0389212	0.0925302	0.0911069	0.218626	0.0076774	-0.0440854	0.0852832	0.182246	0.0643662
236	0.238494	0.195821	0.188276	0.298049	0.114009	0.193391	0.216771	0.224944	0.173621	0.472497	0.3143	0.131293	0.159326	0.265127	0.200576	0.151952	0.32621	0.213271	0.329775	0.22724	0.210411	0.0970954	0.120298	0.169585	0.281307	0.0429474	0.0619769	0.166309	0.0671441	0.147866	0.0414543	0.161896	0.104195	0.234658	-0.0185317	0.026676	0.0943968	0.135437	0.0155833
237	0.259703	0.184121	0.189882	0.299476	0.112495	0.21761	0.231521	0.217544	0.155194	0.478127	0.312791	0.133238	0.163905	0.254995	0.206983	0.152572	0.317461	0.220828	0.326792	0.23192	0.199811	0.0962831	0.14436	0.138165	0.220022	0.0828355	0.0482157	0.145959	0.0722973	0.140483	0.0895502	0.109395	0.0851679	0.23068	-0.0319686	0.0367612	0.0505236	0.185102	0.0799589
238	0.235146	0.201426	0.199873	0.317491	0.104147	0.181834	0.233257	0.224187	0.183325	0.465245	0.347173	0.11614	0.171524	0.258639	0.231673	0.194319	0.295519	0.198545	0.321225	0.248223	0.188993	0.0940239	0.129681	0.139146	0.270089	0.0435087	0.0801046	0.135072	0.0836681	0.143488	0.0957181	0.0983515	0.0852128	0.246582	-0.0595113	0.0199559	0.0634629	0.133596	0.100294
239	0.237833	0.190156	0.204413	0.306513	0.105156	0.213815	0.224583	0.209589	0.163029	0.472368	0.313056	0.130933	0.163364	0.251511	0.20518	0.187681	0.302156	0.183468	0.328503	0.239715	0.194939	0.0989349	0.156556	0.129768	0.227166	0.0320306	0.0690227	0.197684	0.0786986	0.176866	0.044174	0.103012	0.0949435	0.259577	-0.0236692	0.00903021	0.0970329	0.117653	-0.0111324
240	0.237006	0.185347	0.18764	0.302616	0.117126	0.20414	0.230164	0.222639	0.16954	0.503711	0.34399	0.123266	0.176745	0.249793	0.220281	0.195322	0.296468	0.216317	0.331593	0.213715	0.201361	0.100655	0.115105	0.15583	0.215322	0.0715792	0.0560554	0.199852	0.0624391	0.16725	0.0467513	0.0875774	0.0841023	0.239451	-0.0226543	0.00666786	0.0896881	0.103261	0.01306
