# Supplementary material for: ESCO1 and CTCF enable formation of long chromatin loops by protecting cohesinSTAG1 from WAPL
Source: eLife. 2020 Feb 17;9:e52091. doi: 10.7554/eLife.52091 (PMC7054000; doi:10.7554/eLife.52091)
Supplement: Supplementary file 1. — A. Number of the library. B. Condition used to generate the library. C. Number of the biological replicate. D. Restriction enzyme used to generate the Hi-C library. E. Raw number of read pairs from paired-end sequencing. F. Unique valid mapped read pairs from HiCUP v0.7.1. G. Number of unique valid read pairs that are inter-chromosomal. H. Percentage of unique valid read pairs that are inter-chromosomal. I. Log2 contact enrichment of A-A and B-B contacts for long-range (>10 Mb) intra-chromosomal contacts. J. Log2 contact enrichment of A-A and B-B contacts for inter-chromosomal contacts, K. Percentage of genome covered by TADs called by HOMER v4.7. L. Number of TADs called by HOMER v4.7. M. Number of loops called by the hiccups algorithm of Juicer tools v0.7.5. N. Average standardized insulation score at the corresponding G1 control TAD boundaries (hires or r1, r2 average) called by HOMER v4.7 in the respective conditions. O. Average standardized insulation score at the TAD boundaries called by HOMER v4.7 in the respective conditions. P. Number of loops called by the hiccups algorithm of Juicer tools v0.7.5; please note that the number of loops that can be called depends on the number of unique read pairs. This needs to be taken into consideration when comparing corner peaks between different experiments. [file elife-52091-supp1.xlsx]

## Sheet: Hi-C samples
	Table 1. Summary statistics for Hi-C data sets generated in this study
A. No.	B. Condition	C. Biological replicate	D. Restriction enzyme	E. Total read pairsa	F. Unique read pairsb	G. Trans read pairsc	H. % trans read pairsc	I. Cis comp.scored	J. Trans comp.scoree	K. TAD genome coveragef (%)	L. No. of TADsg	M. Median TAD length (kb)h	N. Average TADB strength (insulation score)i1	O. Average TADB strength (insulation score)i2	P.No of loopsj
1	control high resolution	1	MboI	1,474,037,625	916286586	82912240	0.0904872	0.43694	0.330512	71.82	4092	400000	1.03	1.03	24444
2	STAG1 RNAi high resolution	1	MboI	1,369,342,451	855693522	119697796	0.139884	0.375963	0.291374	72.0373	3702	440000	0.95	1.05	11545
3	STAG2 RNAi high resolution	1	MboI	1,334,974,287	840729828	115715018	0.137636	0.374576	0.267552	73.5234	3440	490000	0.84	1.03	14047
4	WAPL RNAi high resolution	1	MboI	880941188	407276964										15183
5	CTCF RNAi high resolution	1	MboI	655763875	341631638										4585
6	ESCO1 RNAi high resolution	1	MboI	693823141	314531452										6944
7	control R1	1	HindIII	199,688,663	98211144	5425643	0.0552447	0.555853	0.484769	58.9385	3144	445000	0.905	0.91	10,844
		2	HindIII	240,143,927	108271389	5783217	0.0534141	0.512804	0.4681	58.193	3089	450000	0.895	0.89
8	CTCF RNAi	1	HindIII	237,323,139	108135338	9664980	0.0893786	0.311899	0.189806	62.4006	2656	567500	0.625	0.87	4414
		2	HindIII	291,987,724	133761550	13171488	0.0984699	0.32265	0.219869	63.3295	2670	585000	0.595	0.86
9	ESCO1 RNAi	1	HindIII	215,477,899	94411272	13854484	0.146746	0.504762	0.427119	63.7612	2760	560000	0.755	0.96	3555
		2	HindIII	234,853,785	85463840	12859640	0.150469	0.509502	0.407186	63.2185	2730	565000	0.745	0.96
10	STAG1 siRNA	1	HindIII	189,078,810	95572782	9453126	0.0989102	0.486585	0.4004	60.9229	2832	530000	0.775	0.89	6834
		2	HindIII	288,779,039	121694728	10026275	0.0823887	0.449533	0.379391	59.4379	2767	540000	0.785	0.87
11	STAG2 siRNA	1	HindIII	225,983,542	111684868	9470061	0.0847927	0.467714	0.370404	62.1083	2704	565000	0.76	0.95	11,378
		2	HindIII	272,546,577	136916058	10711215	0.078232	0.434535	0.353037	61.8255	2671	570000	0.745	0.91
12	STAG1+CTCF	1	HindIII	293873827	137409357	15064145	0.10963	0.362521	0.275578	63.2622	2649	585000	0.545	0.83	2621
		2	HindIII	230498643	99063364	10530598	0.106302	0.381399	0.262617	62.9806	2666	575000	0.575	0.85
13	STAG2+CTCF	1	HindIII	202518989	91072235	11213070	0.123123	0.319727	0.12692	63.2625	2486	630000	0.565	0.89	3439
		2	HindIII	276301529	111224693	14928679	0.134221	0.313133	0.104646	62.1242	2388	655000	0.565	0.87
14	ESCO1 + STAg2 RNAi	1	HindIII	373623777	217034789	36025922	0.165991	0.422845	0.375412	66.1363	2555	654375	0.61	0.86	6834
		2	HindIII	248368126	126629139	19871331	0.156925	0.456078	0.39842	63.2458	2710	570000	0.67	0.92
15	STAG1-AID -auxin	1	MboI	452,586,603	253,727,285	45,461,704	17.9%								8241
16	STAG1-AID +auxin	1	MboI	583,939,355	325,983,331	70,693,000	21.7%								5253
17	STAG2-AID -auxin	1	MboI	502,741,150	273,195,939	47,387,898	17.3%								9926
18	STAG2-AID +auxin	1	MboI	485,224,663	260,192,023	53,385,027	20.5%								6540
