# Supplementary material for: ESCO1 and CTCF enable formation of long chromatin loops by protecting cohesinSTAG1 from WAPL
Source: eLife. 2020 Feb 17;9:e52091. doi: 10.7554/eLife.52091 (PMC7054000; doi:10.7554/eLife.52091)
Supplement: Supplementary file 2. — Number of cells analyzed by FISH in Figure 5—figure supplement 2 for control,CTCF, SCC1, STAG1, STAG2 and double STAG1/STAG2 RNAi. Statistical significance is measured by t-test relative to the control. [file elife-52091-supp2.xlsx]

## Sheet: Feuil1
Table 2: Number of cells analysed by FISH and statistical significance
Domain 1
condition	control	CTCF	SCC1	STAG1	STAG2	STAG1/2
n	648	382	681	561	533	516
t-test to control	1	<0.0001	<0.0001	<0.0001	0.8317	<0.0001
Domain 2
condition	control	CTCF	SCC1	STAG1	STAG2	STAG1/2
n	267	259	154	179	215	118
t-test to control	1	<0.0001	<0.0001	<0.0001	0.2478	<0.0001
Domain 3
condition	control	CTCF	SCC1	STAG1	STAG2	STAG1/2
n	432	382	842	698	605	603
t-test to control	1	<0.0001	<0.0001	<0.0001	<0.0001	<0.0001
Domain 4
condition	control	CTCF	SCC1	STAG1	STAG2	STAG1/2
n	108	127	141	131	173	176
t-test to control	1	<0.0001	<0.0001	<0.0001	0.5345	<0.0001
Domain 5
condition	control	CTCF	SCC1	STAG1	STAG2	STAG1/2
n	380	366	165	481	280	565
t-test to control	1	0.6979	<0.0001	<0.0001	<0.0001	<0.0001
Domain 6
condition	control	CTCF	SCC1	STAG1	STAG2	STAG1/2
n	201	295	368	311	256	387
t-test to control	1	<0.0001	<0.0001	<0.0001	0.0941	<0.0001
Negative control
condition	control	CTCF	SCC1	STAG1	STAG2	STAG1/2
n	354	124	124	142	130	139
t-test to control	1	0.5165	0.6555	0.6759	<0.0001	0.1996
